# Supplementary material for: A systematic mapping review of effective interventions for communicating with, supporting and providing information to parents of preterm infants
Source: PubMed Central journal article supplement — BMJ Open. 2011 Jun 2;1(1):e000023. doi: 10.1136/bmjopen-2010-000023 (PMC3191395; doi:10.1136/bmjopen-2010-000023), 2011-06-02

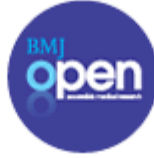

## A systematic review of effective interventions for communicating with, supporting and providing information to parents of pre-term infants

|                               |                                                                                                                                                                                                                                                                                                                                                                                                                                                                                                                                                                                                                                                                                                                                                                                                                                                                                                                                                                                                                                                                                                                                                                                                                                                                                                                                                              |
|-------------------------------|--------------------------------------------------------------------------------------------------------------------------------------------------------------------------------------------------------------------------------------------------------------------------------------------------------------------------------------------------------------------------------------------------------------------------------------------------------------------------------------------------------------------------------------------------------------------------------------------------------------------------------------------------------------------------------------------------------------------------------------------------------------------------------------------------------------------------------------------------------------------------------------------------------------------------------------------------------------------------------------------------------------------------------------------------------------------------------------------------------------------------------------------------------------------------------------------------------------------------------------------------------------------------------------------------------------------------------------------------------------|
| Journal:                      | <i>BMJ Open</i>                                                                                                                                                                                                                                                                                                                                                                                                                                                                                                                                                                                                                                                                                                                                                                                                                                                                                                                                                                                                                                                                                                                                                                                                                                                                                                                                              |
| Manuscript ID:                | BMJ Open-2010-000023                                                                                                                                                                                                                                                                                                                                                                                                                                                                                                                                                                                                                                                                                                                                                                                                                                                                                                                                                                                                                                                                                                                                                                                                                                                                                                                                         |
| Article Type:                 | Research                                                                                                                                                                                                                                                                                                                                                                                                                                                                                                                                                                                                                                                                                                                                                                                                                                                                                                                                                                                                                                                                                                                                                                                                                                                                                                                                                     |
| Date Submitted by the Author: | 15-Nov-2010                                                                                                                                                                                                                                                                                                                                                                                                                                                                                                                                                                                                                                                                                                                                                                                                                                                                                                                                                                                                                                                                                                                                                                                                                                                                                                                                                  |
| Complete List of Authors:     | Brett, Jo; Warwick University<br>Staniszewska, Sophie<br>Newburn, Mary; Warwick University<br>Jones, Nicola; Warwickshire NCT Pre-term Support Group<br>Taylor, Lesley; National Childbirth Trust                                                                                                                                                                                                                                                                                                                                                                                                                                                                                                                                                                                                                                                                                                                                                                                                                                                                                                                                                                                                                                                                                                                                                            |
| <b>Subject Heading</b>:       | Paediatrics                                                                                                                                                                                                                                                                                                                                                                                                                                                                                                                                                                                                                                                                                                                                                                                                                                                                                                                                                                                                                                                                                                                                                                                                                                                                                                                                                  |
| Keywords:                     | NEONATOLOGY, Community child health < PAEDIATRICS, Social Health                                                                                                                                                                                                                                                                                                                                                                                                                                                                                                                                                                                                                                                                                                                                                                                                                                                                                                                                                                                                                                                                                                                                                                                                                                                                                             |
| Abstract:                     | <p>Objective: To identify effective communication with, supporting and providing information for parents of pre-term infants</p> <p>Design: Systematic review</p> <p>Data sources: Medline, Embase, PsychINFO, the Cochrane library, CINHAL, MIDIRS, HMIC, and HELMIS. Hand-searching of journals.</p> <p>Studies reviewed: 74 papers identified, 20 papers were randomised controlled trials, 16 were cohort or quasi-experimental studies, 16 were qualitative studies and 22 were other descriptive studies.</p> <p>Results: Interventions for supporting, communicating with, and providing information to parents that have had a premature infant are reported. Parents report feeling supported through individualised developmental and behavioural care programmes, through being taught behavioural assessment scales, and through breast feeding, kangaroo care and baby massage programmes.</p> <p>Parents also felt supported through organised support groups and through provision of an environment where parents can meet and support each other. Parental stress may be reduced through individual developmental care programmes, through psychotherapy, through interventions that teach emotional coping skills and active problem solving, and journal writing.</p> <p>Evidence reports the importance of preparing parents for the</p> |

1  
2  
3  
4  
5  
6  
7  
8  
9  
10  
11  
12  
13  
14  
15  
16  
17  
18  
19  
20  
21  
22  
23  
24  
25  
26  
27  
28  
29  
30  
31  
32  
33  
34  
35  
36  
37  
38  
39  
40  
41  
42  
43  
44  
45  
46  
47  
48  
49  
50  
51  
52  
53  
54  
55  
56  
57  
58  
59  
60

|  |                                                                                                                                                                                                                                                                                                                                                                                                                                                                                                                                                                                                                                                                                                                                                                                                                        |
|--|------------------------------------------------------------------------------------------------------------------------------------------------------------------------------------------------------------------------------------------------------------------------------------------------------------------------------------------------------------------------------------------------------------------------------------------------------------------------------------------------------------------------------------------------------------------------------------------------------------------------------------------------------------------------------------------------------------------------------------------------------------------------------------------------------------------------|
|  | <p>neonatal unit through the neonatal tour, and the importance of good communication throughout the infant admission phase and after discharge home. Providing individual web-based information about the infant, recording doctor-patient consultations, and provision of an information binder may also improve communication with parents.</p> <p>The importance of thorough discharge planning throughout the infant's admission phase and the importance of home support programmes are also reported.</p> <p>Conclusion: The paper reports evidence of interventions that help support, communicate with and inform parents who have had a premature infant throughout the admission phase of the infant, discharge, and returning home. A summary of interventions from the available evidence is reported.</p> |
|  |                                                                                                                                                                                                                                                                                                                                                                                                                                                                                                                                                                                                                                                                                                                                                                                                                        |

peer review only

SCHOLARONE™  
Manuscripts

1  
2  
3  
4  
5  
6  
7  
8  
9  
10  
11  
12  
13  
14  
15  
16  
17  
18  
19  
20  
21  
22  
23  
24  
25  
26  
27  
28  
29  
30  
31  
32  
33  
34  
35  
36  
37  
38  
39  
40  
41  
42  
43  
44  
45  
46  
47  
48  
49  
50  
51  
52  
53  
54  
55  
56  
57  
58  
59  
60

## A systematic review of effective interventions for communicating with, supporting and providing information to parents of pre-term infants

Jo Brett\*, Sophie Staniszewska,\* Mary Newburn,\*\* Nicola Jones,\*\*\* Lesley Taylor \*\*

\* Royal College of Nursing Research Institute,  
School of Health and Social Studies,  
University of Warwick, Coventry, CV4 7AL  
Tel: 024761 50622

[J.Brett@warwick.ac.uk](mailto:J.Brett@warwick.ac.uk)

[Sophie.Staniszewska@warwick.ac.uk](mailto:Sophie.Staniszewska@warwick.ac.uk)

\*\* National Childbirth Trust

Alexandra House, Oldham Terrace, London  
W3 6NH

Tel: 0844 243 6000

[m\\_newburn@national-childbirth-trust.co.uk](mailto:m_newburn@national-childbirth-trust.co.uk)

[Lesley.taylor@automedia.ltd.uk](mailto:Lesley.taylor@automedia.ltd.uk)

\*\*\* Warwickshire NCT Pre-term Support Group

No fixed address

[nicola@scott-jones.net](mailto:nicola@scott-jones.net)

## Abstract

**Background and Objective:** The birth of a pre-term infant can be an overwhelming experience of guilt, fear, and helplessness for parents. Provision of interventions to support and engage parents in the care of their infant may improve outcomes for both the parents and the infant. The objective of this systematic review is to identify effective interventions for communication with, supporting and providing information for parents of pre-term infants.

**Design:** Systematic searches were conducted in the electronic databases Medline, Embase, PsychINFO, the Cochrane library, CINHALL, MIDIRS, HMIC, and HELMIS. Hand-searching of reference lists and journals was conducted. Studies were included if they provided parent-reported outcomes of interventions relating to information, communication, and/or support for parents of pre-term infants prior to the birth, during care at the NICU, and after going home with their pre-term infant.

**Studies reviewed:** 74 papers identified, 20 papers were randomised controlled trials, 16 were cohort or quasi-experimental studies, 16 were qualitative studies and 22 were other descriptive studies.

**Results:** Interventions for supporting, communicating with, and providing information to parents that have had a premature infant are reported. Parents report feeling supported through individualised developmental and behavioural care programmes, through being taught behavioural assessment scales, and through breast feeding, kangaroo care and baby massage programmes. Parents also felt supported through organised support groups and through provision of an environment where parents can meet and support each other. Parental stress may be reduced through individual developmental care

1  
2  
3  
4 programmes, through psychotherapy, through interventions that teach emotional coping  
5  
6 skills and active problem solving, and journal writing.  
7  
8  
9

10  
11 Evidence reports the importance of preparing parents for the neonatal unit through the  
12 neonatal tour, and the importance of good communication throughout the infant admission  
13 phase and after discharge home. Providing individual web-based information about the  
14 infant, recording doctor-patient consultations, and provision of an information binder may  
15 also improve communication with parents.  
16  
17  
18  
19  
20  
21  
22  
23

24  
25 The importance of thorough discharge planning throughout the infant's admission phase  
26 and the importance of home support programmes are also reported.  
27  
28  
29  
30  
31  
32

33 **Conclusion:** The paper reports evidence of interventions that help support, communicate  
34 with and inform parents who have had a premature infant throughout the admission phase  
35 of the infant, discharge, and returning home. A summary of interventions from the  
36 available evidence is reported.  
37  
38  
39  
40  
41  
42  
43

#### 44 **Article focus:**

45  
46 A systematic review to identify and synthesize evidence of effective interventions for  
47 communicating with, supporting and providing information for parents of pre-term infants.  
48  
49  
50  
51  
52

#### 53 **Key messages:**

- 54  
55  
56 • The review highlights the importance of encouraging and involving parents in the  
57 care of their pre-term infant at the neonatal unit to enhance their ability to cope with and  
58  
59  
60

1  
2  
3  
4 improve their confidence in caring for the infant, which may also lead to improved infant  
5  
6 outcomes and reduced length of stay at the neonatal unit.  
7  
8  
9

10  
11 • Interventions for supporting parents included: 1) involving parents in individualised  
12 developmental and behavioural care programmes (e.g. COPE, NIDCAP, MITP) and  
13 behavioural assessment programmes; 2) breastfeeding, kangaroo care and infant  
14 massage programmes; 3) support forums for parents; 4) interventions to alleviate parental  
15 stress; 5) preparation of parents for various stages, for example seeing their infant for the  
16 first time, preparing to go home; 6) home support programmes.  
17  
18  
19  
20  
21  
22  
23  
24  
25  
26  
27

28 • Involving parents in the exchange of information with and between health  
29 professionals is important, with various modes of providing this information reported, for  
30 example ward rounds with doctors, discussion around infant notes, websites, and hard  
31 copy information.  
32  
33  
34  
35  
36  
37  
38  
39

#### 40 **Strengths and limitations of study:**

##### 41 Strengths

42  
43 This is the first review to synthesize the evidence of interventions to support parents of  
44 pre-term infants through improved provision of information, improved communications  
45 between parents and health professionals and alleviation of stress at all stages of a  
46 parents journey through the neonatal unit. It highlights relatively inexpensive interventions  
47 that can be integrated into their pathway through the neonatal unit and going home,  
48 enhancing parental coping, and potentially improving infant outcomes and reducing the  
49 infants length of stay at the neonatal unit.  
50  
51  
52  
53  
54  
55  
56  
57  
58  
59  
60

1  
2  
3  
4  
5  
6  
7  
8  
9  
10  
11  
12  
13  
14  
15  
16  
17  
18  
19  
20  
21  
22  
23  
24  
25  
26  
27  
28  
29  
30  
31  
32  
33  
34  
35  
36  
37  
38  
39  
40  
41  
42  
43  
44  
45  
46  
47  
48  
49  
50  
51  
52  
53  
54  
55  
56  
57  
58  
59  
60

## Limitations

The quality of the evidence that this review reports is variable, and includes all types of study designs.

For peer review only

## Introduction

While medical advances mean that very premature neonates have an increasingly better chance of survival, the impact of this experience on the child and their parents cannot be underestimated. The birth of a pre-term infant can be an intensely stressful, confusing and difficult time for parents and families<sup>(1)</sup>. Approximately 80,000 pre-term infants are born in the UK each year, and 22,000 of these will be cared for in the neonatal intensive care (NICU)<sup>(2,3)</sup>. Evidence shows that family-centred care on the neonatal unit can reduce the length of the child's stay on the neonatal unit<sup>(4,5,6)</sup>, reduce the rate of readmittance to hospital<sup>(7)</sup>, and improve the outcomes of the baby with regards to morbidity<sup>(8)</sup>.

The Parents of Premature Babies (POPPY) study aims to develop a better understanding of the experiences of a range of parents with pre-term babies, particularly with regards to the communication, information and support they received on the NICU, ensuring that the perspectives of parents are at the heart of the study. This paper reports the results of the first phase of the POPPY study, which takes the form of a systematic review to identify effective interventions for communicating with, supporting and providing information for parents of pre-term babies.



## Methods

Systematic searches were undertaken for the period of January 1980 to October 2006 in the following databases: Medline, Embase, PsychINFO, the Cochrane library, CINHALL, MIDIRS, HMIC, and HELMIS. A combination of text terms and MeSH terms were used to maximise the volume of literature retrieved. Grey literature was sought from specialists in the field, and the following journals were hand-searched from 1990 onwards for all relevant English language articles: Neonatal Network Journal, Journal of Neonatal Nursing and Journal of Obstetric, Gynecologic, and Neonatal Nursing. Update searches were undertaken in October 2009.

Studies were included if they provided parent-reported outcomes of interventions relating to information, communication, and/or support for parents of pre-term infants prior to the birth, during care at the NICU, and after going home with their pre-term infant.

Furthermore, it was felt that the systematic review should be inclusive of all study designs as it is often not feasible or appropriate to conduct randomised control trials (RCTs) or other intervention studies on the outcomes for parents that were measured. It was deemed therefore that, despite the potential bias inherent in descriptive studies, the results of these studies nonetheless gave an important insight into parent-related interventions and should be included in this review.

The data extraction form and quality assessment for inclusion criteria were based on the guideline from the NHS Centre for Reviews and Dissemination (NHS CRD)<sup>(9)</sup> Initially, two reviewers extracted data (JB, SS) independently for 20% of papers and disagreements

1  
2  
3  
4 were resolved by discussion with a third reviewer. There was a high level of agreement  
5  
6 between reviewers, so the remaining data was extracted by one reviewer and checked by  
7  
8 a second. Any disagreements were resolved by discussion with a third reviewer. The  
9  
10 quantitative studies covered a wide range of interventions and different methods of  
11  
12 assessment so it was not possible to carry out a meta-analysis. A non-quantitative  
13  
14 synthesis was conducted based on the extracted data. In the summary figure (Figure 3),  
15  
16 the included evidence was assessed using the Scottish Intercollegiate Guidelines  
17  
18 Assessment (SIGN) <sup>(10)</sup>.  
19  
20  
21  
22  
23  
24  
25

## 26 Search Results

27  
28 **Figure 1: The results from the literature search.**  
29  
30  
31  
32  
33

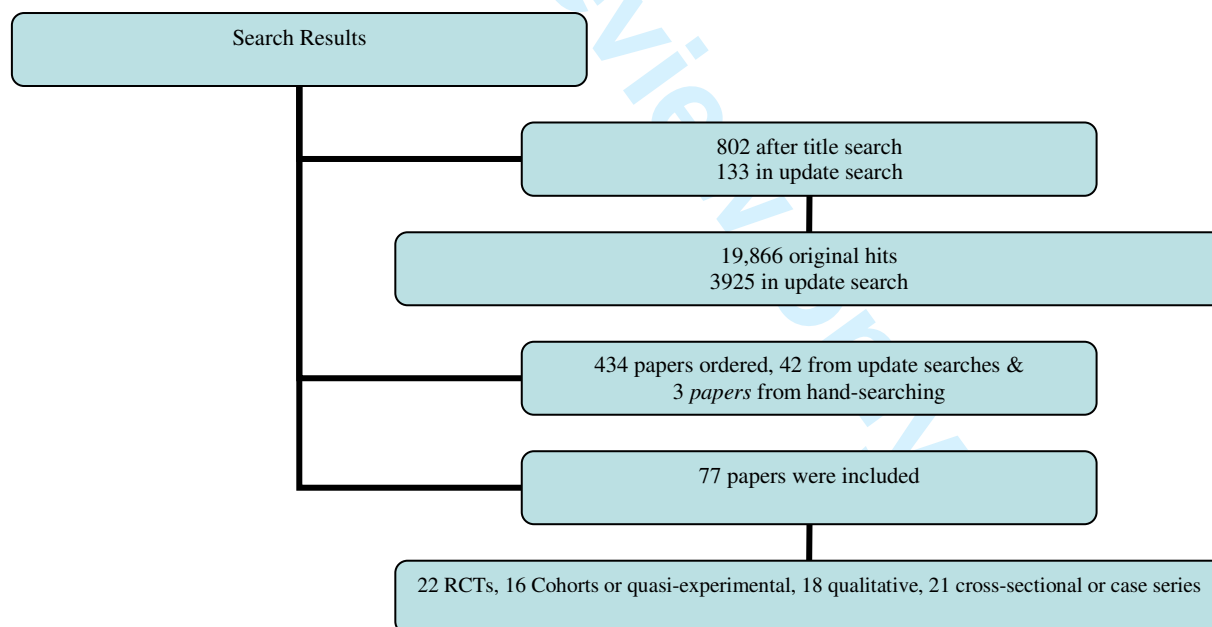

34  
35  
36  
37  
38  
39  
40  
41  
42  
43  
44  
45  
46  
47  
48  
49  
50  
51  
52  
53  
54  
55  
56  
57  
58  
59  
60  
Seventy seven papers were included (four were deemed relevant in two of the sections). Papers were excluded for a number of reasons including the fact that no parent

1  
2  
3  
4 outcome was identified, the study was irrelevant to neonatal services offered in developed  
5  
6 countries such as the UK (3), or the study was deemed to be inadequate after quality  
7  
8 assessment using NHS CRD guidance. (11)  
9  
10  
11  
12

13  
14 Tables 1a and 1b report the data from the randomised control trials, quasi  
15  
16 experimental studies and cohort studies. Other evidence is reported in summary format  
17  
18 within the text .  
19  
20  
21  
22  
23  
24  
25  
26  
27  
28  
29  
30  
31  
32  
33  
34  
35  
36  
37  
38  
39  
40  
41  
42  
43  
44  
45  
46  
47  
48  
49  
50  
51  
52  
53  
54  
55  
56  
57  
58  
59  
60

1  
2  
3  
4  
5  
6  
7  
8  
9  
10  
11  
12  
13  
14  
15  
16  
17  
18  
19  
20  
21  
22  
23  
24  
25  
26  
27  
28  
29  
30  
31  
32  
33  
34  
35  
36  
37  
38  
39  
40  
41  
42  
43  
44  
45  
46  
47

Table 1: Data extraction tables

1a. Randomised controlled trials:

| Author (Year Country) | Study design | Intervention                                                                                                                                                                  | Outcome measure                                                                       | No of cases              | No. of controls | Statistically significant                                                                                                                                                                                                                                                                                                                                                                  | Quality (SIGN) |
|-----------------------|--------------|-------------------------------------------------------------------------------------------------------------------------------------------------------------------------------|---------------------------------------------------------------------------------------|--------------------------|-----------------|--------------------------------------------------------------------------------------------------------------------------------------------------------------------------------------------------------------------------------------------------------------------------------------------------------------------------------------------------------------------------------------------|----------------|
| Als 2003 USA          | RCT          | NIDCAP (Neonatal individualised Developmental Care and Assessment Programme)                                                                                                  | PSI (Parental Stress Index)                                                           | 38                       | 38              | Hospital 1: I= 35.7 (sd 21.3)<br>C=44.9 (sd34.2)<br>Hospital 2: I=55.8 (sd28.8)<br>C=65.2 (sd27.5)<br>Hospital 3: I=49.0 (sd28.6)<br>C=55.9 (sd22.5)<br>Group score @ = .41, p<.001<br>Summary: MANOVA: F=2.41, df=5.66, p<0.05                                                                                                                                                            | 1++            |
| Barrera 1986 Canada   | RCT          | Teaching developmental care                                                                                                                                                   | HOME Parent-infant interaction                                                        | 40                       | 40              | At 4 mths and 16 mths, mothers in the Parent-Infant intervention group and full term control group were significantly better maternal responsiveness and mother-infant interaction compared to the term baby control group.<br><br>Manova:<br>Maternal responsiveness<br>I=7.32, FTC – 7.44, C- 6.41, f=6.78, p<0.001<br>Maternal involvement:<br>I=7.23, FTC-7.16, C-6.26, f=2.70, p<0.05 | 1-             |
| Browne 2005 USA       | RCT          | Family based intervention (Gp1: demonstration of pre-term baby behavioural cues; Gp2: viewed educational video and books about pre-term babies)                               | Nursing Child Assessment Scale (NCAFS) and Knowledge of Preterm Behavior Scale (KPIB) | Gp1: 28<br>Gp2:31        | 25              | Intervention group reported significantly greater sensitive interaction with pre-term babies, and significantly greater knowledge of pre-term babies than controls at 1 month after discharge<br><br>(NCAFS 45.65, 6.20 vs. 47.43, 7.36 vs. 48.88, 7.41, p<0.05; m KPIB 23.32, SD 5.88 in group 1 vs. 25.90, 5.30, in group 2 vs. 5.01 in group 3, p<0.001)                                | 1+             |
| Cobiella 1990 USA     | RCT          | Two stress reduction programmes:<br>a) Video-tape training in active problem-focussed coping strategies<br><br>b) Video-tape in emotion-focussed strategies to manage anxiety | State-Trait Anxiety Inventory (STAI), Depression Assessment Checklist (DACL)          | Gp. A – 10<br>Gp. B - 10 | 10              | On post-treatment follow-up both the problem-focused and emotion-focused treatment groups were significantly less anxious than controls and lower levels of depression were observed for the emotion-focused group<br><br>STAI: PF-t(11)=2.71 p<0.01<br>EF-t2.56 p<0.02<br>DACL: PF – NS                                                                                                   | 1-             |

|                          |     |                                                                                                                                                                                                                                                                                            |                                                                                                                                                           |                     |                       | EF-t(12)=2.36, p<0.03                                                                                                                                                                                                                                                                                                                                                                       |    |
|--------------------------|-----|--------------------------------------------------------------------------------------------------------------------------------------------------------------------------------------------------------------------------------------------------------------------------------------------|-----------------------------------------------------------------------------------------------------------------------------------------------------------|---------------------|-----------------------|---------------------------------------------------------------------------------------------------------------------------------------------------------------------------------------------------------------------------------------------------------------------------------------------------------------------------------------------------------------------------------------------|----|
| Ferber 2004 Israel       | RCT | Baby massage:<br>I= to receive 15 massages 3 times per day for<br>Gp1: mothers conduct massage<br>Gp2: Researchers conduct massage<br>Gp 3 controls                                                                                                                                        | Coding Interactive Bel<br>Assessment for newbo                                                                                                            | Gp 1: 18<br>Gp2: 18 | 19                    | At 3 months, mothers of massaged infants were less intrusive, interactions were more reciprocal.<br><br>Gp1: Dyadic reciprocity (DR) – 2.42+0.87<br>Maternal Intrusiveness(MI)-1.97+0.91<br>Gp2: DR – 2.46+0.99<br>MI – 1.68+0.63<br>Gp3: DR – 1.66+0.68<br>MI – 2.54+1.01<br>DR: F=4.69,p<0.01<br>MI: F=4.05,p<0.02<br><br>No significant difference in maternal sensitivity was reported. | 1+ |
| Glazebrook et al 2007 UK | RCT | Nursing Child Assessment Teaching Scale (N<br>at neonatal unit, with optional follow-up                                                                                                                                                                                                    | Parental Stress Index (P<br>Home Observation for<br>Measurement of the<br>Environment (HOME)                                                              | 99                  | 111                   | No significant differences reported at discharge or at 3 months discharge.                                                                                                                                                                                                                                                                                                                  | 1+ |
| Hall 2002 Canada         | RCT | Weighing infant before and after feeds to asse<br>maternal confidence in breast feeding                                                                                                                                                                                                    | Parental sense of comp<br>scale<br>Maternal confidence<br>questionnaire<br>Influence of specific re<br>scale                                              | 30                  | 30                    | No significant differences in maternal confidence or competen<br>between weighed or not-weighed infants                                                                                                                                                                                                                                                                                     | 1- |
| Huckaby 1999 USA         | RCT | Photograph of baby given to mother to take w<br>while baby on neonatal unit                                                                                                                                                                                                                | Bonding Observation<br>Checklist (BOCL)<br>Physical Examination<br>Observation Checklist<br>(PEOCL)                                                       | 20                  | 20                    | Mothers with picture had significantly better scores on bonding<br>measure than those without picture (p<0.001 for BOCL and p<<br>PEOCL)                                                                                                                                                                                                                                                    | 1+ |
| Kaarensen 2000           | RCT | Mother-Infant Transaction Program<br>The intervention consisted of 8 sessions short<br>discharge and 4 home visits by specially train<br>nurses focusing on the infant's unique charact<br>temperament, and developmental potential and<br>interaction between the infant and the parents. | PSI                                                                                                                                                       | 71                  | 69 preterm<br>75 term | Early-intervention program reduces parenting stress in both m<br>and fathers during the first year after a preterm birth to a level<br>comparable to their term peers<br><br>Mothers 6 mths - total stress: 16.9 (5.2 to 28.5) .005<br>Mothers 12mths – total stress: 13.7 (1.6 to 25.9) .03<br>Fathers 12 moths – total stress: 14.8 (2.1 to 27.6) .02                                     | 1+ |
| Koh 2007 Australia       | RCT | Recording doctors consultation                                                                                                                                                                                                                                                             | Information recall<br>10 days, 4 months, 1 y<br><br>91% of mothers in the<br>group listened to the ta<br>(once by day 10, twice<br>months, and three time | 93                  | 93                    | At 10 days and four months, mothers in the tape group recalled<br>significantly more information about diagnosis, treatment and<br>outcomes than control group.<br><br>10 days:1.35 (1.08 to 1.69) p<0.007, treatment 1.35 (1.00 to 1.8<br>outcome 1.24 (1.05 to 1.47), p<0.009 than mothers in the co<br>group.                                                                            | 1+ |

|                         |     |                                                                                                                                                                                                |                                                                                                                   |                           |                           |                                                                                                                                                                                                                                                                                                                                                                                                                                                                                                                                                                                                                                                           |     |
|-------------------------|-----|------------------------------------------------------------------------------------------------------------------------------------------------------------------------------------------------|-------------------------------------------------------------------------------------------------------------------|---------------------------|---------------------------|-----------------------------------------------------------------------------------------------------------------------------------------------------------------------------------------------------------------------------------------------------------------------------------------------------------------------------------------------------------------------------------------------------------------------------------------------------------------------------------------------------------------------------------------------------------------------------------------------------------------------------------------------------------|-----|
|                         |     |                                                                                                                                                                                                | months; range 1-10).                                                                                              |                           |                           | 4 months: diagnosis 1.27 (0.99 to 1.63) $p < 0.05$ , treatment 1.35 (1.00 to 1.70) $p < 0.045$ , and outcome 1.75 (1.27 to 2.4), $p < 0.004$                                                                                                                                                                                                                                                                                                                                                                                                                                                                                                              |     |
|                         |     |                                                                                                                                                                                                |                                                                                                                   |                           |                           | No statistically significant differences were found between the intervention and control groups in satisfaction with conversations (10 days), postnatal depression scores (10 days, four and 12 months), and stress about parenting (12 months).                                                                                                                                                                                                                                                                                                                                                                                                          |     |
| Lai<br>2006<br>Taiwan   | RCT | Effects of kangaroo care combined with music                                                                                                                                                   | State-Trait Anxiety Inventory (STAI)                                                                              | 15                        | 15                        | Music during KC also resulted in significantly lower maternal anxiety in the treatment group on day 3 of the intervention ( $t(19,6) = -2.1$ , $p < 0.05$ ). Maternal state anxiety improved daily, indicating a curvilinear dose effect ( $F(1,49,40.39) = 5.81$ , $p < 0.01$ ). Anxiety levels in the control group remained unchanged                                                                                                                                                                                                                                                                                                                  | 1+  |
| Melnyk<br>2006<br>USA   | RCT | Creating Opportunities for Parent Empowerment (COPE) - Information and behavioural activities about appearance and behavioural characteristics of preterm infants and how best to parent them. | Infant length of stay<br>Parental Stressor Scale<br>State-Trait Anxiety Scale (STAI)<br>Index of Parental Beliefs | 147 Mothers<br>81 Fathers | 113 Mothers<br>73 Fathers | Mothers in the intervention group reported significantly less stress, less depression and anxiety at 2 months after birth.<br>Anxiety: 28.72 (27.31-30.12) vs 30.83 (29.23-32.42) $p < 0.05$<br>Depression: 5.56 (4.66-6.45) vs 7.21 (6.20-8.23) $p < 0.02$<br>PSS: 3.29 (3.09-3.49) vs 3.58 (3.35-3.80), $p < 0.05$<br>Parental Knowledge: 32(31.63-33.01) vs 30.50 (29.73-31.27) $p < 0.05$<br><br>There were no differences found for Fathers anxiety or depression symptoms.<br>Infant length of stay at the NICU and at the hospital was significantly lower in the intervention group (3.8 days less in NICU, 3.9 days less in hospital) $p < 0.05$ | 1++ |
| Meyer 1994              | RCT | Family based intervention (Psychological intervention for family, teaching care and behavioural cues for baby, home discharge plan)                                                            | Parental Stressor scale<br>Maternal self esteem Inventory, Beck Depression Scale (BDS), Family Environment Scale  | 34                        | 34                        | Intervention group reported significantly less stress (PSS) and significantly less depression (BDS) at discharge.<br><br>BDI: Int: 11% vs. 44%, $p < 0.05$ ; 39% vs 31% NS.<br>PSS: Int: $2.4 \pm 1.0$ ; $2.0 \pm 0.8$ vs Con $2.4 \pm 0.9$ ; $2.6 \pm 0.8$ $p < 0.05$                                                                                                                                                                                                                                                                                                                                                                                    | 1+  |
| Nurcombe<br>1984<br>USA | RCT | Behavioural Assessment Scale: Mother-Infant Transaction Programme (MITP)                                                                                                                       | Hereford Parent Attitude Survey<br>Seashore Self Confidence Rating Paired Comparison Questionnaire                | 37                        | 36                        | Intervention group scored better on maternal adaptation (role satisfaction, attitudes to child-rearing, self confidence) than low birth weight controls ( $F(3, 87)$ , $p < 0.030$ ).<br>Univariate analysis:<br>Maternal satisfaction $F(2,89)$ , 4.55, $p < 0.013$<br>Maternal attitude (2,89), 4.05, $p < 0.021$<br>Maternal self confidence $F(1,89)$ , 7.44, $p < 0.008$<br><br>Full term controls scored better than combined low birth weight controls ( $F[3,87]$ , 3.27, $p = 0.025$ ).                                                                                                                                                          | 1+  |

|                                    |     |                                                                                                         |                                                                                                                                   |     |     |                                                                                                                                                                                                                                                                                                                                                                                                                                                                                                                                                                                                                                                                                                                                                                                                                                                                                                                                                                                                                                                                            |    |
|------------------------------------|-----|---------------------------------------------------------------------------------------------------------|-----------------------------------------------------------------------------------------------------------------------------------|-----|-----|----------------------------------------------------------------------------------------------------------------------------------------------------------------------------------------------------------------------------------------------------------------------------------------------------------------------------------------------------------------------------------------------------------------------------------------------------------------------------------------------------------------------------------------------------------------------------------------------------------------------------------------------------------------------------------------------------------------------------------------------------------------------------------------------------------------------------------------------------------------------------------------------------------------------------------------------------------------------------------------------------------------------------------------------------------------------------|----|
| Parker-Loewe<br>1987<br>Canada     | RCT | 8 X 40 minute interaction coaching to encourage sensitive responding by mothers                         | Satisfaction with Parenting Scale<br>Knowledge of Infant Development Scale<br>Life experiences survey<br>Interaction rating scale | 35  | 35  | No significant difference between treatment and control group on interaction or knowledge of infant development or satisfaction with parenting                                                                                                                                                                                                                                                                                                                                                                                                                                                                                                                                                                                                                                                                                                                                                                                                                                                                                                                             | 1- |
| Spiker<br>1993<br>USA              | RCT | Home Support (Infant Health and Development Program (IHDP) – Home visits from discharge up to 36 weeks) | Quality of assistance in parenting pre-term babies<br>Supportive presence for parents of pre-term infants                         | 271 | 412 | Intervention group reported significantly better quality of assistance ratings than control group (I: 3.6 [1.5], vs 3.3[1.5], p<0.05), but no significant difference on supportive presence was reported. Most outcomes in this study were baby outcomes.                                                                                                                                                                                                                                                                                                                                                                                                                                                                                                                                                                                                                                                                                                                                                                                                                  | 1- |
| Tessier<br>1998<br>Columbia        | RCT | Effects of Kangaroo care                                                                                | Mothers perception of premature babies questionnaires                                                                             | 246 | 246 | Kangaroo care significantly increased mother’s sense of competence in mothering their baby (F(1481) 10.36, P .001), and was significantly increased maternal sensitivity to their baby at the neonatal unit. ( F(1481) 3.71, P .05).<br>This improved perception of their baby effect is related to a subtle “bonding effect” that may be better understood readily by the empowering nature of the KMC intervention. The study also reported a negative effect on feelings of received support from health professionals of mothers practicing KMC (F 5.03, P .03).<br><br>Kangaroo care significantly reduced length of stay especially in low birth weight babies.<br>Two-way analysis of variance stratifying by birth weight show the savings in hospital stays were clearly related to weight at birth. The interaction effect ( F(3480) 4.06, P .01) shows that the maximum saving in the KMC group was observed in infants weighing 1500g (4.5 to 6.7 days), whereas in infants weighing 1500g, the length of hospital stay was virtually identical in both groups | 1+ |
| Van der Pal<br>2007<br>Netherlands | RCT | NIDCAP                                                                                                  | PSI<br>Parents of Mother and Infant Scale<br>Nurse Parent Support                                                                 | 94  | 84  | No significant differences were reported in Parental Stress Index, Confidence of parents, or perceived nursing support at 1 to 2 weeks after birth                                                                                                                                                                                                                                                                                                                                                                                                                                                                                                                                                                                                                                                                                                                                                                                                                                                                                                                         | 1+ |

**1b. Quasi- experimental and cohort Studies.**

| Author (Year Country) | Study design | Intervention                           | Outcome measure                                                   | No of cases | No. of controls | Statistically significant results | Quality (SIGN) |
|-----------------------|--------------|----------------------------------------|-------------------------------------------------------------------|-------------|-----------------|-----------------------------------|----------------|
| Byers<br>2003         | Cohort       | Co-bedding multiples in same incubator | NIDCAP infant behavior checklist<br>State-Trait Anxiety Inventory | 16          | 21              | No significant results reported   | 2-             |

|                           |        |                                                                                                                                |                                                                                                                      |                  |    |                                                                                                                                                                                                                                                                                                                                                                                                                                                                                                                                                                                                                                                                                                                                                                                                                                                                                                                                                                                                                  |    |
|---------------------------|--------|--------------------------------------------------------------------------------------------------------------------------------|----------------------------------------------------------------------------------------------------------------------|------------------|----|------------------------------------------------------------------------------------------------------------------------------------------------------------------------------------------------------------------------------------------------------------------------------------------------------------------------------------------------------------------------------------------------------------------------------------------------------------------------------------------------------------------------------------------------------------------------------------------------------------------------------------------------------------------------------------------------------------------------------------------------------------------------------------------------------------------------------------------------------------------------------------------------------------------------------------------------------------------------------------------------------------------|----|
| USA                       |        |                                                                                                                                | Maternal Attachment Inventory<br>Parental satisfaction to                                                            |                  |    |                                                                                                                                                                                                                                                                                                                                                                                                                                                                                                                                                                                                                                                                                                                                                                                                                                                                                                                                                                                                                  |    |
| Byers<br>2006<br>USA      | Cohort | Family-centred care/developmental supportive ca                                                                                | Questionnaire develop<br>study to measure paren<br>perceptions and satisf<br>Study mainly reports b<br>outcomes      | 57               | 57 | No differences in parent perception or satisfaction with the neonatal unit                                                                                                                                                                                                                                                                                                                                                                                                                                                                                                                                                                                                                                                                                                                                                                                                                                                                                                                                       | 2- |
| Feldman<br>2002<br>Israel | Cohort | Effects of Kangaroo care                                                                                                       | Mother-Infant interact<br>Maternal depression<br>Mothers perceptions<br>HOME                                         | 73               | 73 | At 37 weeks gestational age: After kangaroo care, interactions more positive, mot<br>showed more positive affect, touch, adaptation to infant cues, infants more alertne<br>less gaze aversion, mothers less depressed & viewed infants as less abnormal. Les<br>maternal depression [KC mean 6.68 (5.55) vs control 9.05 (4.27), F=5.68, p<0.05<br><br>At 3 months corrected age: mothers and fathers of kangaroo care infants more sen<br>and provided better home environment.<br><br>KC Mothers provided a better home environment Manova at 3 months – HOME:<br>(df=7,123), 2.99, p<0.01. KC fathers provided a better home environment – HOM<br>Wilks F (df=7,110), 2.45, p<0.05.<br><br>At 6 months corrected age: kangaroo care mothers more sensitive (maternal sensit<br>KC mean 4.20 (0.64) vs control mean 3.86 (0.76, univariate 5.36, p<0.05) & infar<br>scored higher on Bayley Mental Development Index (96.39 vs. 91.81, p<0.01) and<br>Psychomotor Development Index (85.47 vs. 80.53, p<0.05) | 2+ |
| Finello<br>1998<br>USA    | Cohort | Home Support<br>Gp1: Home healthcare and home visitng<br>Gp2: Home healthcare only<br>Gp3: Home visiting only                  | 1 week after discharge<br>HOME<br>CES-D<br>FACES II<br>6 mths after:<br>HOME<br>12 months:<br>CES-D, FACESII<br>HOME | ?<br>81 in total | ?  | Interventions improved the home environment (at 1 month, mean HOME 27.2, SI<br>group 1 vs. 24.2, 2.7 for group 2 vs. 30.0, 6.2 for group 3 vs. 22.7, 3.3 for group 4<br>p<0.001; at 6 months, 33.7, 5.9 vs. 30.2, 4.3 vs. 34.4, 4.3 vs. 28.9, 5.0, p=0.003; a<br>months, 35.2, 5.2 vs. 31.2, 3.8 vs. 35.6, 5.3 vs. 30.5, 5.0, p=0.005). No difference<br>groups on FACES II at 1 or 12 months, or on maternal parenting satisfaction. The<br>was more strongly associated with reports of support from husband (p<0.001), fri<br>support (p<0.001) and family support (p<0.001). Mean depression score at 1 mon<br>(SD 11.59, range 0-48 on a total scale range of 0-60; 16 considered cut-off for cli<br>depression (no differences between groups). Mean CES-D at 12 months 19.76, SI<br>range 2-42, still indicating clinically significant levels of depression.<br>No other significant results were reported.                                                                                              | 2+ |
| Jotzo<br>2005<br>Germany  | Cohort | Psychological intervention to reduce stress at neot<br>unit (One off psychological intervention to help p<br>cope with stress) | Questionnaire:<br>Impact of events scale<br>Trauma experiences m                                                     | 25               | 25 | Mothers in intervention group had significantly lower traumatic impact from prete<br>(lower overall symptoms: traumatic impact I 25.2 (SD 13.9), C 37.5 (SD 19.2), r<br>difference 12.28 (2.74-21.82, p=0.013; lower avoidance I 7.7 (SD 5.3), C 12.4 (\$<br>mean difference 4.65 (0.67-8.69), p=0.023 and hyperarousal, I 5.9 (SD 4.7), C9.<br>5.7), mean difference – 3.56 (0.61 – 6.51), p=0.019; lower intrusion symptoms bu<br>significant). Control group: 76% of mothers showed clinically significant psychol<br>trauma at discharge vs. 36% (p<0.01) in intervention group.                                                                                                                                                                                                                                                                                                                                                                                                                             | 2+ |
| Kurz 2002<br>Austria      | Cohort | Home support (Phone call and counselling of pare<br>returning home) for parents of babies with monit                           | Questionnaire about m<br>use, stress reported by                                                                     | 90               | 70 | Home monitoring considered reassuring for 60% of families. After intensive coun<br>introduced, parents liked the instruction better (74% vs. 44% very satisfied; 24%                                                                                                                                                                                                                                                                                                                                                                                                                                                                                                                                                                                                                                                                                                                                                                                                                                             | 2+ |



|                               |        |                                                                                                                                                                                                                                                                                                                                                                                                        |                                                                                                                                  |        |                      |                                                                                                                                                                                                                                                                                                                                                                                                                                                                                                                                                                                                                                                                                           |     |
|-------------------------------|--------|--------------------------------------------------------------------------------------------------------------------------------------------------------------------------------------------------------------------------------------------------------------------------------------------------------------------------------------------------------------------------------------------------------|----------------------------------------------------------------------------------------------------------------------------------|--------|----------------------|-------------------------------------------------------------------------------------------------------------------------------------------------------------------------------------------------------------------------------------------------------------------------------------------------------------------------------------------------------------------------------------------------------------------------------------------------------------------------------------------------------------------------------------------------------------------------------------------------------------------------------------------------------------------------------------------|-----|
|                               |        |                                                                                                                                                                                                                                                                                                                                                                                                        | use, and satisfaction                                                                                                            |        |                      | satisfied; 2% vs. 5% not satisfied, $p<0.005$ ), were less stressed by the monitor (4.63% stressed by false alarms, $p<0.05$ ) and reacted less aggressively to monitor alarms (8% vs. 24% reacted by vigorously shaking or lifting baby, $p<0.05$ ); used monitor during sleeping periods; used monitor for less time (6.1 months vs. 7.6 months, $p<0.05$ ); Counselling did not reduce anxiety.                                                                                                                                                                                                                                                                                        |     |
| Leonard<br>1989<br>USA        | Cohort | Educational support programme for infants on home monitors (Infant Apnea Evaluation Programmes (IAEP))<br>Gp1 – with home monitoring<br>Gp2- no home monitoring<br>Gp3 – healthy term babies                                                                                                                                                                                                           | Symptom checklist-90<br>schedule of recent events<br>satisfaction - all in interviews<br>wks after going home                    | Gp1-40 | Gp 2- 30<br>Gp3 - 32 | Psychological symptoms highest in parents of non-monitored premature infants (Mann-Whitney U test: $U=0.2845$ [0 – 0.82] vs , NM – 0.4507 [0-1.3], $p=0.037$ ); particularly fathers of non-monitored infants scoring high on depression (0.6846)).<br><br>Support highest in monitored infants ( $p=0.005$ )<br>NS on family satisfaction                                                                                                                                                                                                                                                                                                                                                | 2+  |
| Lindsay<br>1993<br>USA        | Cohort | Parent to Parent Peer support for parents with critically ill pre-term babies.                                                                                                                                                                                                                                                                                                                         | Parent report                                                                                                                    | ?      | ?                    | Numerical data not reported in paper<br>Reported benefit to parents: emotional support + Information support                                                                                                                                                                                                                                                                                                                                                                                                                                                                                                                                                                              | 2-  |
| Ortenstrand<br>2001<br>Sweden | Cohort | Early discharge with domiciliary nursing care<br>Domiciliary nurse made an individual care and discharge plan together with the parents. During these planning sessions, parent's knowledge of how to care for the term infant were checked and supplemented. The nurse was available for home visit/ telephone consultation Monday to Friday, and at weekends parents could contact the neonatal ward | STAI                                                                                                                             | 40     | 35                   | No differences in mothers' Trait anxiety at 1 <sup>st</sup> or 2 <sup>nd</sup> assessment. State (situational) anxiety lower for EDG mothers at 1 <sup>st</sup> assessment (EDG 30.9 [SD 6.2] vs. CG 36.6 [SD 6.2], $p<0.01$ ).<br><br>Fathers showed a significant difference in trait anxiety at both 1 <sup>st</sup> and 2 <sup>nd</sup> study time points (30.1 (5.8) vs 33.5 (7.7), $p<0.05$ , but only a significant difference in state anxiety at the 1 <sup>st</sup> assessment (29.5 [5.4] vs 32.8 [9.1], $p<0.08$ ).<br><br>At 1 yr, no difference in recollection of anxiety in caring for the infant or in experience of mental imbalance related to the birth of the infant | 2+  |
| Penticuff<br>2005<br>USA      | Cohort | Discussion around Infant progress chart                                                                                                                                                                                                                                                                                                                                                                | Comprehension of infant medical condition and satisfaction with collaboration with health professionals<br>baby at neonatal unit | 77     | 77                   | Intervention group had fewer unrealistic concerns (ANOVA): (4.32 (0.86) vs 8.56 (1.02), $p<0.018$ ; less uncertainty about the infant medical condition 1.92 (0.30) vs 3.52 (0.40), $p<0.003$ ; had less decision conflict 45.88 (2.33) vs 59.10 (2.32), $p<0.001$ ; more satisfaction with medical decisions process 120.20 (4.07), 104.95 (4.33), $p<0.012$ ; more satisfaction with decision input 33.44 (1.30) vs 30.05 (1.21), $p<0.058$ .<br><br>No significant difference was reported in satisfaction of care for the infant by HC and in satisfaction with decision made.                                                                                                        | 2++ |
| Piecuch<br>1983<br>USA        | Cohort | videophone                                                                                                                                                                                                                                                                                                                                                                                             | No. of calls made to neonatal unit while baby at unit                                                                            | 17     | 17                   | Mean number of telephone calls to NICU used as proxy for interest in newborns. Mothers with access to videophone made more calls: (1.0 vs. 0.2, $p<0.05$ ) when mothers hospitalized; (0.9 vs. 0.3, $p<0.05$ ) when mother discharged. Mothers appreciated videophone; relieved at being able to see infants; infant's condition not as bad as they imagined; many talked to infant even though only viewing an image; wanted to see baby's hands and feet as well as face.                                                                                                                                                                                                               | 2 - |
| Preyde<br>2003<br>Canada      | Cohort | Parent to Parent Peer Support                                                                                                                                                                                                                                                                                                                                                                          | Parental Stressor scale<br>State-Trait Anxiety Scale (Spielberger)                                                               | 32     | 28                   | Intervention group better scores on all measures at 4 or 16 weeks (groups were equal at baseline), e.g. mean PSS score 1.54 (1.3-1.7) in intervention group at 4 weeks vs 2.7-3.1 in controls, $p<0.001$                                                                                                                                                                                                                                                                                                                                                                                                                                                                                  | 2++ |

1  
2  
3  
4  
5  
6  
7  
8  
9  
10  
11  
12  
13  
14  
15  
16  
17  
18  
19  
20  
21  
22  
23  
24  
25  
26  
27  
28  
29  
30  
31  
32  
33  
34  
35  
36  
37  
38  
39  
40  
41  
42  
43  
44  
45  
46  
47

|               |                    |                                                                                                                                                                                                                                                                                                                                                               |                                                                                                                                       |                                     |    |                                                                                                                                                                                                                                                                                                                                                                                                                                                                                                                                  |    |
|---------------|--------------------|---------------------------------------------------------------------------------------------------------------------------------------------------------------------------------------------------------------------------------------------------------------------------------------------------------------------------------------------------------------|---------------------------------------------------------------------------------------------------------------------------------------|-------------------------------------|----|----------------------------------------------------------------------------------------------------------------------------------------------------------------------------------------------------------------------------------------------------------------------------------------------------------------------------------------------------------------------------------------------------------------------------------------------------------------------------------------------------------------------------------|----|
|               |                    |                                                                                                                                                                                                                                                                                                                                                               |                                                                                                                                       |                                     |    | At 4 weeks mean PSS score was significantly less in the intervention group – 1.54 (1.7) vs 2.93 (2.7-3.1), p<0.001.<br>At 16 weeks mean anxiety score, mean depression score, and perceived support were significantly less in the intervention group: anxiety - 31.4 (27.2-35.4) vs 38.6 (34.4-42.8), p<0.05; depression - 2.20 (0.89-3.60) vs 4.88 (3.51-6.17), p<0.01; perceived support - 6.49 (6.02-6.82) vs 5.48 (5.09-5.94), p<0.01.<br>There were no differences in trait anxiety between the groups at any time period. |    |
| Rauh 1990 USA | Cohort             | Vermont Mother-Infant Transaction Programme (teach parents to appreciate infants unique characteristics, behavioural cues, teach parents to respond to infant cues, enhance mothers enjoyment of baby).                                                                                                                                                       | Maternal Role Satisfaction questionnaire<br>Self-Confidence rating<br>Parent Attitude scale                                           | 40                                  | 41 | At 6 months: significantly better intervention effects for maternal role satisfaction, confidence and perception of infant temperament in intervention group; no differences in maternal attitudes to child-rearing. Data not given in paper.                                                                                                                                                                                                                                                                                    | 2- |
| Resnick 1988  | Cohort             | Educational developmental Intervention Programme home – teach parents to use: parent’s voice tape, infant’s passive range of motion, exercises) and twice-monthly interventions at home by child development specialist through 12 months adjusted age (e.g. language and skills enrichment exercises, cognitive development exercises, parenting activities) | Greenspan-Lieberman Observations System (to analyse infant-caregiver interactions at 6 and 12 months)                                 | 21                                  | 20 | Parent child positive verbal scores significantly higher in treatment than control group (2.91 vs. 2.08), p=0.02. Intervention group dyads had fewer negative verbal interactions (0.07 vs. 0.17, p=0.03).<br><br>The developmental intervention benefited the quality of the parent-infant interactions at home, as well as benefiting the infant development.                                                                                                                                                                  | 2- |
| Ross 1984 USA | Cohort             | Teaching developmental care at home to lower socioeconomic parents                                                                                                                                                                                                                                                                                            | HOME<br>Maternal Attitudes Scale<br>Maternal development Expectations and child attitudes survey<br>Baby outcomes (not reported here) | 44                                  | 40 | Intervention group reported significantly higher HOME scores (total score 38.4 vs 34.4, p<0.001). No other significant differences reported                                                                                                                                                                                                                                                                                                                                                                                      | 2+ |
| Brown 1994    | Quasi experimental | Booklet, videotape and practical session. for parents of broncho-pulmonary dysplasia discharged from tertiary care centre. Education on physical characteristics of infants on continuous low-flow oxygen & their care. Psychological development of infant, parental needs, oxygen equipment, CPR in NICU                                                    | Pre-test Post-test study<br>Pre-test of knowledge immediately before and after programme; post-test 6 weeks after discharge           | 18 primary caregivers of 10 infants |    | Post-test scores (immediate mean = 17.33 [SD 3.91]; delayed 17.17 [4.41]) significantly higher than pretest scores (14.38 [3.72], p<0.01)                                                                                                                                                                                                                                                                                                                                                                                        | 2+ |

## Results

Interventions for supporting parents included: 1) individualised developmental and behavioural care programmes<sup>(4,11,12,13,14,15,16,17)</sup> (e.g. COPE, NIDCAP, MITP – see below); 2) behavioural assessment scales; 3) breastfeeding, kangaroo care and infant massage programmes; 4) support forums for parents; 5) the alleviation of parental stress; 6) preparing parents for seeing their infant for the first time; 7) communication and information sharing; 8) discharge planning; and 9) home support programmes.

### 1) Supporting parents through individualised developmental and behavioural care programmes

#### *Figure 2: Individualised developmental and behavioural care programmes*

1) COPE<sup>(4)</sup> (Creating Opportunities for Parent Empowerment) provides an educational programme for parents at the neonatal unit on the appearance and behavioural characteristics of pre-term infants, how parents can participate in their infant's care, and how parents can make more positive interactions with their infant.

2) NIDCAP<sup>(11,12,13)</sup> (Neonatal Individualised Developmental Care and Assessment Programme) is an intervention that stimulates pre-term infants and improves the interaction between mothers and infants

3) MITP (Mother-Infant Transaction Programme)<sup>(14,15,16)</sup> helps to enable the parents to appreciate their infant's unique characteristics, temperament, and developmental potential.

1  
2  
3  
4 sensitising parents to their infant's cues so that they can respond appropriately.  
5  
6  
7  
8

9 **4) NCATS (Nursing Child Assessment Teaching Scale) NCATS (Nursing Child**  
10 **Assessment Teaching Scale)**<sup>(17)</sup> : Examines the mother-child relationship in conjuncti  
11  
12 with teaching mothers how to interact with the baby, teaching behavioural cues, how t  
13  
14 play etc  
15  
16  
17

18 **NB:** While the developmental care programmes are designed to improve the development of the baby,  
19 interventions give parents psychological support and practical guidance on how to care for their infants  
20  
21  
22

23  
24  
25  
26  
27  
28 Fourteen studies reported individualised developmental and behavioural care  
29 programmes, of which nine were RCTs (see Table 1a). The RCT evidence (1++ & 1+)  
30 suggested that the involvement of parents in an individualised developmental and  
31 behavioural care programme significantly reduced the maternal stress created by the  
32 NICU environment and the demands of their infant (Melnik 2006, 1++; Kaaresen 2006,  
33 1+; Browne 2005, 1+; Als 2003, 1++; Meyer 1994, 1+; Nurcombe 1984, 1+)<sup>(4,11,14,16,18,19)</sup>. This  
34 intervention also significantly improved the parental understanding of their infant and their  
35 interactions with their infant<sup>(4)</sup> (Melnik 2006).  
36  
37  
38  
39  
40  
41  
42  
43  
44  
45  
46  
47  
48

49 Recent RCT evidence suggested that the introduction of the NIDCAP intervention had not  
50 significantly changed levels of parental stress, confidence or nursing support. However,  
51 the outcomes were measured only 1-2 weeks after the baby was born (Van der Pal 2007,  
52 1+)<sup>(12)</sup>. The introduction of the NCATS programme in the NICU made no significant  
53 difference to parental stress levels and maternal-infant interactions when assessed at  
54 discharge and at three months after discharge (Glazebrook et al. 2007, 1+)<sup>(20)</sup>. One RCT  
55  
56  
57  
58  
59  
60

1  
2  
3  
4 found that coaching parents on how to interact with their pre-term infant made no  
5  
6 difference to knowledge of care, sensitivity to the infant or satisfaction in parenting  
7  
8 compared with the control group(Parker-Loewen 1987, 1-)<sup>(21)</sup>. However, this may have  
9  
10 been confounded by the amount of contact that the control mothers had with the  
11  
12 researchers, as these mothers reported that they enjoyed having someone show an  
13  
14 interest in them.  
15  
16  
17  
18  
19  
20

21 Evidence from a cohort reported that the Vermont Mother-Infant Transaction  
22  
23 Programme (MITP) significantly improved maternal satisfaction, maternal self-confidence,  
24  
25 and mothers' perception of their infant's temperament at six months<sup>(15)</sup>. One cohort study  
26  
27 reported that individualised developmental care programmes appeared to make no  
28  
29 difference to parents' perceptions of the neonatal unit or satisfaction with care, despite  
30  
31 significantly lowering stress cues in the pre-term infants<sup>(22)</sup>.  
32  
33  
34  
35  
36  
37

38 Evidence from qualitative studies provides an insight into the benefits of  
39  
40 individualised developmental and behavioural care programmes at the neonatal unit, such  
41  
42 as empowering parents to take care of their infants, teaching parents behavioural cues of  
43  
44 their infants, problem-solving, and learning how to interact with their infants, resulting in a  
45  
46 greater satisfaction with the care provided<sup>(13,23,24)</sup>. Furthermore, parents reported a reduction  
47  
48 in stress after such programmes and said that they felt more confident in caring for their  
49  
50 infants, which promoted parental self-reliance when returning home<sup>(24)</sup>.  
51  
52  
53  
54  
55  
56

## 57 **2) Supporting parents through use of Behavioural Assessment Scales**

58  
59  
60

1  
2  
3  
4  
5  
6  
7  
8  
9  
10  
11  
12  
13  
14  
15  
16  
17  
18  
19  
20  
21  
22  
23  
24  
25  
26  
27  
28  
29  
30  
31  
32  
33  
34  
35  
36  
37  
38  
39  
40  
41  
42  
43  
44  
45  
46  
47  
48  
49  
50  
51  
52  
53  
54  
55  
56  
57  
58  
59  
60

No RCT evidence was reported on this intervention. Three cross-sectional studies provided insights into how to teach parents assess and interpret the behaviour of their pre-term through using the Brazelton Behavioural Assessment scales. The studies reported this intervention may improve mother-infant bonding, reduce maternal anxiety, and help mothers foster a more realistic perception of their pre-term infants<sup>(25,26,27)</sup>.

### 3) Supporting parents through breast feeding, kangaroo care and infant massage

Four studies reported on parent outcomes of interventions around breast-feeding, of which one was a RCT, six studies reported on parent outcomes of interventions around kangaroo care (skin to skin contact with baby out of the incubator), of which 2 were RCTs, and two studies reported parent outcomes around baby massage, (see Table 1c). An RCT (1-) reported no significant difference in the mother's confidence and competence in carrying out breast feeding by weighing the infant before and after feeds<sup>(28)</sup>.

Three cross-sectional studies and one case series study reported on breast feeding interventions. The studies reported that parents receiving breastfeeding support at the neonatal unit were more likely to continue breastfeeding up to a month after discharge than comparable groups. Breast-feeding education and support at the neonatal unit in the form of counselling, information (handouts and videos), practical help and group breastfeeding clinics improved the confidence of mothers in breast-feeding. An individualised discharge plan for breast feeding mothers with follow-up telephone calls or home visits appeared to maintain mothers' confidence in breastfeeding, and provide reassurance<sup>(29,30,31)</sup>.

1  
2  
3  
4  
5 Six studies reported parent outcomes of using kangaroo care with their pre-term  
6 infants, of which two were RCTs. The RCT evidence suggests that use of kangaroo care  
7 significantly reduces maternal anxiety around her infant, gives the mother a significantly  
8 greater sense of competence with their infant, and a significantly greater sensitivity  
9 towards her infant (Tessier 1998, 1+)<sup>(32)</sup>. Furthermore, RCT evidence suggests that music  
10 during kangaroo care resulted in significantly lower maternal anxiety (Lai 2006, 1+)<sup>(33)</sup>.  
11  
12  
13  
14  
15  
16  
17  
18  
19  
20

21 One cohort study, which *assessed outcomes of mothers using kangaroo care at 37*  
22 *weeks, at 3 months, and at 6 months*, reported significantly better levels of mother-infant  
23 interaction, more touch, better adaptation to infant cues, and better perception of their  
24 infant at all time periods. Mothers also reported significantly less post-natal depression  
25 compared to the controls at 37 weeks<sup>(34)</sup>.  
26  
27  
28  
29  
30  
31  
32  
33  
34

35 One cross-sectional study reported that the majority of mothers preferred the  
36 kangaroo method, mainly because their baby was closer to them. Touch was important to  
37 mothers, as it induced feelings of well-being and fulfilment in parents<sup>(35)</sup>.  
38  
39  
40  
41  
42  
43

44 In the qualitative studies, parents described how kangaroo care helped them to get  
45 to know their infant, increased their confidence, and made them feel that their infant  
46 needed them<sup>(36)</sup>; parents reported that their mood was improved, that they perceived their  
47 infant differently and felt a stronger sense of identifying with their infant<sup>(37)</sup>.  
48  
49  
50  
51  
52  
53  
54

55 Two studies reported on parent outcomes of baby massage on pre-term infants, of  
56 which one was an RCT (see Table 1d). RCT evidence reported that at three months,  
57 mothers of massaged infants felt significantly less intrusive *towards caring for their baby*,  
58 interactions were more reciprocal, and treated infants were more socially involved  
59  
60

1  
2  
3  
4 compared to controls<sup>(38)</sup>. One cross-sectional study also reported improved maternal-infant  
5  
6 interactions<sup>(39)</sup>.  
7  
8  
9

#### 10 11 12 13 14 15 **4) Support forums for parents** 16

17  
18  
19  
20 No RCT evidence was reported for these interventions. Nine studies reported the  
21  
22 benefits of participating in support groups set up within the NICU, either run by staff at the  
23  
24 neonatal unit or by parents who have experienced having a pre-term infant themselves.  
25  
26 Evidence from cohort studies reported that parent-led peer support groups at the NICU led  
27  
28 to mothers in the intervention group having significantly less stress at four weeks and 16  
29  
30 weeks after support was initiated at the neonatal unit<sup>(40,41)</sup>. Mothers of critically ill pre-term  
31  
32 infants had significantly better maternal mood states, maternal-infant relationships, and  
33  
34 home environments in the intervention group compared to the control group<sup>(42)</sup>  
35  
36  
37  
38  
39  
40  
41  
42

43  
44 Evidence from a qualitative study gave insights into how a health professional led  
45  
46 support group assisted parents to gain perspective, feel supported, and learn practical  
47  
48 information about how to interact with their baby<sup>(43)</sup>. Qualitative evidence also reports that  
49  
50 parent-to-parent support groups provided parents with information, emotional support, and  
51  
52 strength<sup>(44)</sup>. Cross-sectional studies and case series studies reported on how health  
53  
54 professional led support groups also helped to relieve anxiety, gave an opportunity to  
55  
56 communicate with staff, and gain confidence in their parenting skills<sup>(45,46,47)</sup>. Another case  
57  
58 series study reported how a support programme run by parents gave parents space to  
59  
60



1  
2  
3  
4 express their worries and concerns and provided comfort in talking to 'experienced'  
5  
6 parents<sup>(48)</sup>.  
7  
8  
9

## 10 11 12 13 14 15 **5) Alleviating parent stress**

16  
17 Seven studies report interventions that attempt to alleviate the adverse psycho-  
18 social consequences of having a pre-term infant, of which four were RCTs. RCT evidence  
19 is reported in the individualised developmental behavioural programme section for the  
20 stress reduction benefits of COPE, NIDCAP, and MITP<sup>(4,11,14,16)</sup> (Melnyk 2006; Kaarsen  
21 2006; Ali 2003; Nurcombe 1984). Other RCT evidence reports that the use of videotape in  
22 strategies that focus on coping with emotions and active problem solving significantly  
23 reduced maternal stress (Cobiella 1990, 1-)<sup>(49)</sup>.  
24  
25  
26  
27  
28  
29  
30  
31  
32  
33  
34  
35

36 Evidence from a cohort study reported that the use of one-off psychological  
37 interventions to teach relaxation and coping mechanisms to normalise their experience, as  
38 well as emotional and practical support significantly reduced the traumatic impact for  
39 parents compared to controls<sup>(50)</sup>. Two case series studies gave insights into the use of  
40 journal writing for documenting feelings, thoughts, milestones and involvement in care; the  
41 use of psychotherapy to offer support and insight at a time of crisis was also found to  
42 reduce stress<sup>(51,52)</sup>.  
43  
44  
45  
46  
47  
48  
49  
50  
51  
52  
53

## 54 55 **6) Preparing parents for seeing their infant the neonatal unit for the first time**

56  
57 Two studies reported evidence for different ways of preparing parents for seeing  
58 their pre-term infant for the first time, of which one was an RCT<sup>(53,54)</sup>. The RCT evidence  
59  
60

1  
2  
3  
4 reported that giving parents a photograph of their pre-term infant provides a positive effect  
5  
6 by improving bonding with their infant (Huckabay 1999, 1+)<sup>(53)</sup>.  
7  
8  
9

10  
11 The qualitative study gave an insight into how a tour of the neonatal unit prior to  
12 having a pre-term infant (when a pregnancy at high risk of premature labour was  
13 diagnosed) may decrease parent's fears, inspire hope in their infant's prognosis, and give  
14 parents reassurance about the care offered at the NICU<sup>(54)</sup>. However, some parents found  
15 the appearance of the babies and the technology overwhelming, and some expressed  
16 concerns that the tour was not supported by staff on the neonatal unit.  
17  
18  
19  
20  
21  
22  
23  
24  
25  
26  
27  
28  
29  
30  
31  
32  
33  
34  
35  
36

### 37 **7) Interventions for communication and information sharing**

38  
39 Eight studies assessed interventions to improve the issues of communication at the  
40 neonatal unit, of which one was a RCT<sup>(55)</sup>. The RCT evidence reported that taping parent-  
41 doctor consultations improved the recall of parents of the consultation<sup>(55)</sup>. The trial found  
42 that mothers who received audiotapes of their consultation recalled significantly more  
43 information about the diagnosis, treatment, and outcome of their children than women in  
44 the control group at ten days and at four months.  
45  
46  
47  
48  
49  
50  
51  
52  
53  
54

55 Evidence from a cohort study reported that discussions between health professionals and  
56 parents around their infant's progress chart resulted in the intervention group having  
57 significantly fewer unrealistic concerns, less uncertainty about the medical condition of the  
58  
59  
60

1  
2  
3  
4 infant, less conflict and a greater satisfaction with regards to shared decision-making<sup>(56)</sup>.  
5  
6 Another cohort study reported that parents had significantly greater contact with the NICU  
7  
8 *during the infant's admission* and reported a sense of relief at seeing their infant when they  
9  
10 had access to the neonatal unit via a videophone<sup>(57)</sup>.  
11  
12  
13

14  
15  
16 Qualitative evidence investigated the perception of parents regarding the methods  
17  
18 of effective and ineffective communication at the NICU. Parents perceived that the most  
19  
20 effective communication with nurses was through discourse management (nurses asking  
21  
22 questions and encouraging parents to ask questions), caring and reassuring  
23  
24 communication, and communication as equal partners in the care of the infant. Ineffective  
25  
26 communication was perceived as when the information given was inconsistent, staff did  
27  
28 not check if parents understood the information, and if questions were not allowed<sup>(58)</sup>.  
29  
30  
31 Furthermore, qualitative evidence reported that 'chat' or 'social talk' between nurses and  
32  
33 parents had a positive influence on mothers' confidence, their sense of control, and their  
34  
35 feeling of connection with their baby<sup>(59)</sup>.  
36  
37  
38  
39  
40  
41

42  
43 Cross-sectional studies provided an insight into the methods of improving  
44  
45 communication between parents of pre-term infants and health professionals. The use of a  
46  
47 web-based programme (BabyLink ) to provide individualised information to parents helped  
48  
49 communicate complex issue, and parents reported that it helped to humanise the  
50  
51 experience of the neonatal unit<sup>(60)</sup>. Furthermore, a study reported that the use of BabyLink  
52  
53 improved the overall satisfaction of the family with care at the neonatal unit and actually  
54  
55 reduced the length of stay at the neonatal unit<sup>(6)</sup>. Parents reported that they found the tape-  
56  
57 recorded consultations with doctors helpful to process the information, as well as being  
58  
59 comforting and supportive<sup>(61)</sup>.  
60

1  
2  
3  
4  
5  
6  
7  
8  
9  
10  
11  
12  
13  
14  
15  
16  
17  
18  
19  
20  
21  
22  
23  
24  
25  
26  
27  
28  
29  
30  
31  
32  
33  
34  
35  
36  
37  
38  
39  
40  
41  
42  
43  
44  
45  
46  
47  
48  
49  
50  
51  
52  
53  
54  
55  
56  
57  
58  
59  
60

Five studies reported evidence on the information needs of parents, none of which provided RCT level evidence. One pre-test/post-test study concluded that information and training for specific practical care of their infant on oxygen therapy could significantly improve the relevant knowledge of parents, and reduced their distress when entering the transition period of returning home<sup>(62)</sup>.

Three qualitative studies described an information binder that provided relevant information about medical and practical issues relating to the NICU. Parents could add information to the folder. The information binder empowered parents to take an active interest in acquiring relevant information about their infant and improved parents understanding and ability to participate in decision-making. Furthermore, the information binder increased parent's confidence in caring for their infant, and gave them hope of progress for their infant<sup>(63, 64)</sup>. Prioritising information through a "card sort" (cards which state information topics for parents who have had a pre-term infant) was reported by a qualitative study as being a less intimidating way for parents to access important and timely information<sup>(65)</sup>. This study reported that parents' highest priorities were infant cardiopulmonary resuscitation (CPR), infant illness and development; information with a moderate priority were feeding, giving medication, and hygiene; and information topics that were given the lowest priority included getting help at home and the use of car seats. One cross-sectional study reported that the neonatal nurses were the best source of information at the NICU<sup>(66)</sup>.

## 8) Discharge planning

1  
2  
3  
4  
5  
6  
7  
8  
9  
10  
11  
12  
13  
14  
15  
16  
17  
18  
19  
20  
21  
22  
23  
24  
25  
26  
27  
28  
29  
30  
31  
32  
33  
34  
35  
36  
37  
38  
39  
40  
41  
42  
43  
44  
45  
46  
47  
48  
49  
50  
51  
52  
53  
54  
55  
56  
57  
58  
59  
60

Six studies reported on discharge programmes, of which one reported RCT level evidence (Barrera 1986, 1-)<sup>(67)</sup>. RCT evidence suggests that a parent-infant discharge programme within a therapeutic problem-solving model significantly improved parent interactions with their infants, and parents were significantly more engaged with their infants after returning home compared with the parents who did not go through a discharge programme<sup>(67)</sup>.

One cohort study assessed an early discharge programme with an individualised care and discharge plan, followed by domiciliary nursing care, and reported significantly less anxiety in mothers in the intervention group at discharge<sup>(68)</sup>. No significant differences in the experiences of parents with regards to their infant's emotional well-being and breast feeding issues were reported. The levels of anxiety did not appear to be different between groups of parents who did not receive a formal discharge programme at one year after discharge from the neonatal unit<sup>(68)</sup>.

The qualitative studies gave insights into how discharge planning provided support for parents. One study conducted a discharge programme that comprised of an educational programme during the period of hospitalisation for parents with pre-term infants, a visit and orientation about the neonatal unit by the family's health visitor, a multidisciplinary and cross-sector discharge conference, and the publication of relevant booklets for parents and health care providers<sup>(69)</sup>. The parents found that most of the intervention initiatives contributed to a feeling of overall increased support and met their needs, including improving their confidence in caring for their pre-term infant and ensuring the well-being of their child following discharge. Families valued the support and guidance they received from the co-ordinating health visitor, and valued having a named contact

1  
2  
3  
4 nurse throughout their stay at the neonatal unit and at home, which demonstrated the  
5 importance of continuity of care. All participants in this study felt secure when they  
6 returned home.  
7  
8  
9

10  
11  
12  
13 One qualitative study assessed the perceptions of parents of pre-term infants regarding  
14 an early discharge and home-care programme<sup>(70)</sup>. The study concluded that parents of  
15 children who were discharged early may feel more positive about coming home as early as  
16 possible from the hospital, as this may help parents to feel like a 'normal' family and not to  
17 have to share their infant with the nurses and other health professionals on the neonatal  
18 unit. However, parents in this study appreciated the 24 hour accessibility of the staff on the  
19 neonatal unit for support and knowledge.  
20  
21  
22  
23  
24  
25  
26  
27  
28  
29

30  
31  
32  
33 Two further qualitative studies reports a Care by Parent discharge programme and  
34 describes how the mother can stay in the same room or in a room close to her pre-term  
35 infant, assuming all of the aspects of care but with help at hand if needed <sup>(71,72)</sup>. Mothers  
36 reported that it gave them the opportunity to test reality and bridge the gap between  
37 hospital and home, so gaining confidence in taking their infant home, and it helped  
38 mothers to feel like a proper family, and promoted their "ownership" of the infant.  
39  
40  
41  
42  
43  
44  
45  
46  
47  
48

## 49 **9) Home support programmes**

50  
51  
52 Ten studies reported the outcomes of parents who participated in home intervention  
53 programmes, of which two were RCTs. RCT evidence reported that home support  
54 programmes, where parents are visited and given emotional and practical support  
55 regularly for the first year and for up to three years afterwards, lead to significantly reduced  
56 parental stress levels, a greater positive effect on maternal behaviour and greater  
57  
58  
59  
60

1  
2  
3  
4 interactions with their pre-term infant. However, the intervention was not significantly  
5 associated with improved maternal coping (Spiker 1993, 1-)<sup>(73)</sup>. RCT evidence also reports  
6 that regular home support programmes that last for up to a year made mothers  
7 significantly more responsive to their infant and meant that they were able to provide more  
8 appropriate and varied stimulations for the infant (Barrera 1986, 1-)<sup>(67)</sup>.  
9  
10  
11  
12  
13  
14  
15  
16  
17  
18

19 Evidence from a cohort study where parents were visited regularly and taught care-  
20 taking skills, games and exercises reported a significantly better home environment for the  
21 family. However, there was no difference found between the intervention group and the  
22 control group with regards to maternal coping<sup>(74)</sup>. Evidence from a cohort study also  
23 assessed the support and psychological impact of an Infants Apnea Evaluation  
24 Programme (IAEP) for infants on home monitors and reported that monitoring itself  
25 significantly reduced anxiety. The structured support programme was found to be  
26 supportive by parents<sup>(75)</sup>. A similar cohort study introduced a home counselling programme  
27 for parents who used home monitoring. Parents were significantly less stressed by the  
28 presence of the monitor and by false alarms, and reacted less aggressively to monitor  
29 alarms. Parents in the structured support programme used the monitor less, and mainly  
30 during sleeping periods<sup>(76)</sup>. One cohort conducted an educational developmental  
31 programme at home twice monthly using a parent's voice tape, baby massage, and a  
32 passive range of motion and exercise. The programme resulted in a significant  
33 improvement in parent-infant interaction at six months and 12 months after discharge, as  
34 well as benefiting the infant<sup>(77)</sup>.  
35  
36  
37  
38  
39  
40  
41  
42  
43  
44  
45  
46  
47  
48  
49  
50  
51  
52  
53  
54  
55  
56  
57  
58

59 Evidence from a cohort study reported that a home healthcare programme and  
60 home visiting programme significantly improved the home environment of the intervention

1  
2  
3  
4 groups compared to the control groups at one month and 12 months<sup>(5)</sup>. However, there  
5  
6 were no significant differences between groups with regard to family experiences and  
7  
8 parental satisfaction.  
9

10  
11  
12  
13  
14 Evidence from one cross-sectional study and two case series studies give insights  
15  
16 into the effect of home support programmes. Specific to the UK, the community neonatal  
17  
18 service (CNS) was valued positively in providing support and continuity of care for parents  
19  
20 who needed a high level of support (e.g. experiencing depression and bonding struggles  
21  
22 with their infant, infant sleeping issues and feeding problems)<sup>(78)</sup>. One study assessed the  
23  
24 impact of an intensive care co-ordinator who provided home visits for providing teaching,  
25  
26 guidance and support to parents<sup>(79)</sup>. The study reported that the intensive care co-ordinator  
27  
28 made families feel comfortable, offering emotional and practical support, and taught  
29  
30 parents the necessary skills for parenting the pre-term infant. Another similar study  
31  
32 assessed a neonatal integrated home care programme where neonatal nurses taught  
33  
34 specific infant care needs and provided emotional support to parents. Parents reported  
35  
36 that the programme helped them to bring their pre-term infants home earlier, provided  
37  
38 nurse help, support, instruction and encouragement<sup>(80)</sup>.  
39  
40  
41  
42  
43  
44  
45  
46

## 47 Discussion

48  
49  
50

51  
52 The aim of this systematic review focused on identifying interventions that were  
53  
54 effective in supporting, informing and communicating with parents who have had a pre-  
55  
56 term infant. The scope of this review was very broad, and the searches were therefore  
57  
58 developed to be inclusive. This resulted in the search being sensitive, but not specific.  
59  
60



1  
2  
3  
4  
5  
6  
7  
8  
9  
10  
11  
12  
13  
14  
15  
16  
17  
18  
19  
20  
21  
22  
23  
24  
25  
26  
27  
28  
29  
30  
31  
32  
33  
34  
35  
36  
37  
38  
39  
40  
41  
42  
43  
44  
45  
46  
47  
48  
49  
50  
51  
52  
53  
54  
55  
56  
57  
58  
59  
60

The majority of studies included in this review are from the USA, which may affect the generalisation of interventions in neonatal units today and the ability of such studies to be applied in a British practice setting would need to be considered. While this review identified a range of interventions that can help parents, certain groups were under-represented in the study samples, including amongst others minority ethnic groups, individuals from lower social classes and young parents. Further research on which interventions are helpful to these groups is needed.

Despite the limitations of the evidence-base, this systematic review highlights interventions for providing improved support, information and communication to parents of a pre-term infant. These interventions are summarised in Figure 2.

This study has identified a range of interventions that can produce beneficial outcomes for parents in relation to communication, information and support. Important messages have come through this research, which healthcare professionals and neonatal units should consider. Some units may have already utilised some of these interventions, but we would urge them to use the POPPY study results to review current practice and consider whether unit and professional practice requires adaptation or change. Changing practice can be difficult and a number of key elements are required, including evidence, an understanding of the context of care and a way of facilitating this evidence into practice<sup>(81)</sup>. We also acknowledge that part of the context is a complex range of workforce issues that limits what neonatal units can achieve, despite their best efforts. The focus on developing patient-centred care within the NHS in the UK also applies to neonatal units and should include parent-focused care as an extension of this concept<sup>(82)</sup>.

1  
2  
3  
4  
5 Many of the interventions that have been identified in this study could be described  
6  
7 as being building blocks for a family-centred model of care in the UK setting, which  
8  
9 embraces the mother and father or significant others in the medical care of their infant.  
10  
11 Such interventions act through establishing key actions and interventions that emphasise  
12  
13 the importance of communicating with, supporting and informing the family. Furthermore,  
14  
15 our review demonstrated that such family-centred interventions resulted in shorter stays at  
16  
17 the neonatal units, less re-hospitalisation of pre-term infants and better long-term outcome  
18  
19 with regards to morbidity in this group of infants<sup>(4)</sup>. This contributes to a strong argument  
20  
21 that highlights the potential for family-centred care to be made more cost-effective, more  
22  
23 acceptable to parents, and in some cases offer important clinical benefits.  
24  
25  
26  
27  
28  
29  
30  
31  
32  
33  
34  
35  
36  
37  
38  
39  
40  
41  
42  
43  
44  
45  
46  
47  
48  
49  
50  
51  
52  
53  
54  
55  
56  
57  
58  
59  
60

## Acknowledgements

The study was funded by the Big Lottery Fund, and the collaborating organisations included the Royal College of Nursing Institute, the National Childbirth Trust (NCT), the Warwickshire NCT Pre-term Support Group, and BLISS, the premature baby charity. The Parents of Premature Babies (POPPY) project was supported by an advisory group whose membership which consisted of the following people: Charlotte Bennett, Peter Beresford (Chair), Debbie Bick, Maggie Redshaw, Nicola Crichton, Phillipa Goodger, Gill Gyte, Merryl Harvey, Yana Richens, Claire Pimm. The searches for this review were conducted by Paul Miller, Senior Information Specialist, Royal College of Physicians.

### **Ethics Approval:**

Ethics approval was gained for the study through MREC, South East Ethics Research Unit (ref: 06/MRE 01/6)

**Funder:** This study was funded by the Big Lottery

**Guarantor:** The University of Warwick, Coventry, CV7 4AL is the guarantor of this study

#### WHAT IS ALREADY KNOWN ON THIS TOPIC

It has long been recognised that family-centred care at the neonatal unit is beneficial not just for parents of premature infants, but for the infants themselves. While the importance of family centred care is known, neonatal units are unsure which are the most effective family-centred care interventions to support, communicate with, and provide information to these parents

#### WHAT THIS STUDY ADDS

The evidence from the systematic review provides a summary pathway of family-centred care interventions to assist in providing support, information and communication with parents of premature infants throughout their stay at the neonatal unit and after discharge home.

### Copyright statement:

"the Corresponding Author (Jo Brett) has the right to grant on behalf of all authors and does grant on behalf of all authors, an exclusive licence (or non exclusive for government employees) on a worldwide basis to the BMJ Publishing Group Ltd to permit this article (if accepted) to be published in BMJ Open and any other BMJ PGL products and sublicences such use and exploit all subsidiary rights, as set out in our licence."

### Competing interest form:

Please answer the following questions

1. Have you in the past five years accepted the following from an organisation that may in any way gain or lose financially from the publication of this paper:  
 No\_ Reimbursement for attending a symposium?  
 No\_ A fee for speaking?  
 No\_ A fee for organising education?  
 No\_ Funds for research?  
 No\_ Funds for a member of staff?  
 No\_ Fees for consulting?
2. Have you in the past five years been employed by an organisation that may in any way gain or lose financially from the publication of this paper? No
3. Do you hold any stocks or shares in an organisation that may in any way gain or lose financially from the publication of this paper? No
4. Have you acted as an expert witness on the subject of your study, review, editorial, or letter? No
5. Do you have any other competing financial interests? If so, please specify. No

### Contributorship statement

JB conducted the systematic review, sat on the advisory group and steering group for the study, synthesized the evidence and wrote the drafts of the paper.

SS was the principal investigator of the study, obtaining funding for the study, sat on the advisory group and steering groups for the study, over saw all stages of the study, assisted in the identification and quality assessment of the evidence, and assisted in the writing of the first draft of the paper.

MN was the fund holder, sat on the advisory group and steering group of the study and commented on the synthesis of the evidence and draft papers.

1  
2  
3  
4 NJ was the patient representative on this study. She was integral in the development of this  
5 project, in the development of the proposal, sat on the advisory group and the steering group, and  
6 commented on the synthesis of the data and the drafts of the paper  
7

8  
9 LT was integral in the development of this project, in the development of the proposal, sat on the  
10 advisory group and the steering group, and commented on the synthesis of the data and the drafts  
11 of the paper  
12  
13

#### 14 15 **Funding statement**

16  
17 The work was supported by the Big Lottery, grant number: RG/1/01014958  
18  
19  
20  
21  
22  
23  
24  
25  
26  
27  
28  
29  
30  
31  
32  
33  
34  
35  
36  
37  
38  
39  
40  
41  
42  
43  
44  
45  
46  
47  
48  
49  
50  
51  
52  
53  
54  
55  
56  
57  
58  
59  
60

## References

### References

1. Lau R, Morse C. Experiences of parents with premature infants hospitalised in neonatal intensive care units: a literature review. *Journal of Neonatal Nursing* 1998;4: 23-9.
2. Directory of critical care, CMA medical data, 2008
3. BLISS, Information for health Professionals, 2009: <http://www.bliss.org.uk/>
4. Melnyk BM, Feinstein NE, Alpert-Gillis L, Fairbanks E, Crean HF, Sinkin RA, Stone PW, Small L, Tu X, Gross SJ Reducing premature infants' length of stay and improving parents' mental health outcomes with the Creating Opportunities for Parent Empowerment (COPE) neonatal intensive care unit program: a randomized, controlled trial. *Pediatrics*. 2006 Nov;118(5):e1414-27
5. Finello KM, Litton KM, deLemos R, Chan LS. Very low birth weight infants and their families during the first year of life: comparisons of medical outcomes based on after care services. *Journal of Perinatology* 1998;18:365-71.
6. Gray JE, Safron RB, Davis G, Pompilio-Weitzner JE, Zaccagnini L, Pursley D. Baby care link: Using the internet and telemedicine to improve care for high risk infants in pediatrics, 2000; 106:1318-1324
7. Perrault C, Coates AL, Collinge J, Pless IB, Outerbridge EW. Family support system in newborn medicine: does it work? Follow-up study of infants at risk. *Journal of Pediatrics* 1986;108:1025-30.
8. Harrison H. The Principles for family centred neonatal care. *Pediatrics*. 1993 Nov; 92 (5)
9. **Systematic reviews: CRD's guidance for undertaking reviews in health care**, NHS Centre for Reviews and Dissemination, University of York, 2008, <http://www.york.ac.uk/inst/crd/publications.htm>
10. Scottish Intercollegiate Guidelines Network (SIGN). Sign 50: A Guideline Developer's handbook, Jan 2008.
11. Als H, Gilkerson L, Duffy FH, McAnulty GB, Buehler DM, VandenBerg K *et al*. A three-center, randomized, controlled trial of individualized developmental care for very low birth weight preterm infants: Medical, neurodevelopmental, parenting, and caregiving effects. *Journal of Developmental and Behavioral Pediatrics* 2003;24:399-408.
12. Van der Pal S, Macguire C, Cessie S, Wit J, Waither F, Brull J. Parental experiences during the first phase at the neonatal intensive care unit after two developmental care interventions. *Acta Paediatrica* 2007; 96,1611-1616
13. Wielenga J, Smit B, Unk L. How satisfied are parents supported by nurses with the NIDCAP model of care for their preterm infant? *Journal of Nursing Care Quality* 2006; 21(1)41-48.

- 1  
2  
3  
4  
5  
6  
7  
8  
9  
10  
11  
12  
13  
14  
15  
16  
17  
18  
19  
20  
21  
22  
23  
24  
25  
26  
27  
28  
29  
30  
31  
32  
33  
34  
35  
36  
37  
38  
39  
40  
41  
42  
43  
44  
45  
46  
47  
48  
49  
50  
51  
52  
53  
54  
55  
56  
57  
58  
59  
60
14. Kaaresen P I, Rønning J A, Ulvund S E, Dahl L B. A randomized, controlled trial of the effectiveness of an early-intervention program in reducing parenting stress after preterm birth. *Pediatrics* 2006;**118**(1):e9-19.
  15. Rauh VA, Nurcombe B, Achenbach T, Howell C. The Mother-Infant Transaction Program. The content and implications of an intervention for the mothers of low-birthweight infants. *Clinics in Perinatology* 1990;**17**:31-45.
  16. Nurcombe B, Howell DC, Rauh VA, Teti DM, Ruoff P, Brennan J. An intervention program for mothers of low-birthweight infants: preliminary results. *Journal of the American Academy of Child Psychiatry* 1984;**23**:319-25.
  17. **Sumner G, Spietz A (1994). NCATS Caregiver/Parent-Child interaction teaching manual. Seattle, WA: NCATS Publications, University of Washington, School of Nursing.**
  18. Browne JV, Talmi A. Family-based intervention to enhance infant-parent relationships in the neonatal intensive care unit. *Journal of Pediatric Psychology* 2005;**30**:667-77.
  19. Meyer E, Coll C, Seifer R, Ramos A, et al. Psychological distress in mothers of preterm infants. *Journal of Developmental & Behavioral Pediatrics* 1995;**16**:412-7.
  20. Glazebrook C, Marlow N, Israel C, Croudace T, Johnson S, White I et al. Randomised trial of a parenting intervention during neonatal intensive care. *Archives of Disease in Childhood-Fetal and Neonatal Edition* 2007, 1-16
  21. Parker-Loewen DL. Effects of short-term interaction coaching with mothers of preterm infants. *Infant Mental Health Journal* 1987;**8**:277-87.
  22. Byers JF, Lowman LB, Francis J, Kaigle L, Lutz NH, Waddell T et al. A quasi-experimental trial on individualized, developmentally supportive family-centered care. *JOGNN - Journal of Obstetric, Gynecologic, & Neonatal Nursing* 2006; **35**:105-15.
  23. Lawhon G. Facilitation of parenting the premature infant within the newborn intensive care unit. *Journal of Perinatal and Neonatal Nursing* 2002;**16**:71-82.
  24. Prentice M, Stainton MC. The effects of developmental care of preterm infants on women's health and family life. *Neonatal, Paediatric & Child Health Nursing* 2004;**7**: 4-12.
  25. Hawthorne J. Using the Neonatal Behavioural Assessment Scale to support parent-infant relationships. *Infant* 2005;**1**:213-8.
  26. Culp RE, Culp AM, Harmon RJ. A tool for educating parents about their premature infants. *Birth* 1989;**16**:23-6.

- 1  
2  
3  
4  
5  
6  
7  
8 27. Szajnberg N, Ward MJ, Krauss A, Kessler DB. Low birth-weight prematures: preventive  
9 intervention and maternal attitude. *Child Psychiatry & Human Development* 1987;**17** :152-65.  
10  
11 28. Hall WA, Shearer K, Mogan J, Berkowitz J. Weighing preterm infants before & after  
12 breastfeeding: does it increase maternal confidence and competence? *MCN, American Journal*  
13 *of Maternal Child Nursing* 2002;**27**:318-26.  
14  
15 29. Meier PP, Engstrom JL, Mangurten HH, Estrada E, Zimmerman B, Kopparthi R. Breastfeeding  
16 support services in the neonatal intensive-care unit. *JOGNN - Journal of Obstetric, Gynecologic,*  
17 *& Neonatal Nursing* 1993;**22**:338-47.  
18  
19 30. White JC, Smith MM, Lowman DK, Reidy TG, Murphy SM, Lane SJ. Parent support of feeding  
20 in the neonatal intensive care unit: perspectives of parents and occupational therapists.  
21 *Physical and Occupational Therapy in Pediatrics* 2000;**19**:111-26.  
22  
23 31. Elliott S,.Reimer C. Postdischarge telephone follow-up program for breastfeeding preterm  
24 infants discharged from a special care nursery. *Neonatal Network - Journal of Neonatal Nursing*  
25 1998;**17**:41-5.  
26  
27 32. Tessier R, Cristo M, Velez S, Giron M, de Calume ZF, Ruiz-Palaez JG *et al.* Kangaroo mother  
28 care and the bonding hypothesis. *Pediatrics* 1998;**102**:e17.  
29  
30 33. Lai HL, Chen CJ, Peng TC, Chang FM, Hsieh ML, Huang HY *et al.* Randomized controlled trial  
31 of music during kangaroo care on maternal state anxiety and preterm infants' responses.  
32 *International Journal of Nursing Studies* 2006;**43**:139-46.  
33  
34 34. Feldman R, Eidelman AI, Sirota L, Weller A. Comparison of skin-to-skin (kangaroo) and  
35 traditional care: parenting outcomes and preterm infant development. *Pediatrics* 2002;**110**:16-  
36 26.  
37  
38 35. Legault M,.Goulet C. Comparison of kangaroo and traditional methods of removing preterm  
39 infants from incubators. *JOGNN - Journal of Obstetric, Gynecologic, & Neonatal Nursing*  
40 1995;**24**:501-6.  
41  
42 36. Affonso D, Bosque E, Wahlberg V, Brady JP. Reconciliation and healing for mothers through  
43 skin-to-skin contact provided in an American tertiary level intensive care nursery. *Neonatal*  
44 *Network: The Journal of Neonatal Nursing* 1993;**12**:25-32.  
45  
46 37. Gale G, Franck L, Lund C. Skin-to-skin (kangaroo) holding of the intubated premature infant.  
47 *Neonatal Network - Journal of Neonatal Nursing* 1993;**12**:49-57.  
48  
49 38. Ferber SG,.Makhoul IR. The effect of skin-to-skin contact (kangaroo care) shortly after birth on  
50 the neurobehavioral responses of the term newborn: a randomized, controlled trial. *Pediatrics*  
51 2004;**113**:858-65.  
52  
53  
54  
55  
56  
57  
58  
59  
60



- 1  
2  
3  
4  
5  
6  
7  
8 39. Remedios CM. Evaluation of massage programme for premature infants. *Physiotherapy Singapore* 2005 **8**:4-7.  
9  
10  
11 40. Roman R. Research in nursing and health, 1995, vol 18, no.5, pp 385-394  
12  
13 41. Preyde M, Ardal F. Effectiveness of a parent "buddy" program for mothers of very preterm  
14 infants in a neonatal intensive care unit. *CMAJ Canadian Medical Association Journal*  
15 2003;**168**:969-73.  
16  
17 42. Lindsay JK, Roman L, DeWys M, Eager M, Levick J, Quinn M. Creative caring in the NICU:  
18 parent-to-parent support. *Neonatal Network - Journal of Neonatal Nursing* 1993;**12**:37-44.  
19  
20  
21  
22 43. Pearson J, Andersen K. Evaluation of a program to promote positive parenting in the neonatal  
23 intensive care unit. *Neonatal Network - Journal of Neonatal Nursing* 2001;**20**:43-8.  
24  
25 44. Buarque V, de Carvaiho Lima M, Parry Scott R, Vasconcelos M, The influence of support  
26 groups on the family of risk newborns and on neonatal unit workers. *Jornal de pediatria* 2006;  
27 82 (4), 295-301  
28  
29  
30  
31 45. Hurst I. One size does not fit all: Parents evaluation of a support program in the neonatal  
32 intensive care nursery. *Journal of Perinatal and Neonatal Nursing* 2006; 20(3), 252-261  
33  
34 46. Bracht M, Ardal F, Bot A, Cheng CM. Initiation and maintenance of a hospital-based parent  
35 group for parents of premature infants: key factors for success. *Neonatal Network - Journal of*  
36 *Neonatal Nursing* 1998;**17**:33-7.  
37  
38  
39  
40 47. Dammers J, Harpin V. Parents' meetings in two neonatal units: a way of increasing support for  
41 parents. *British Medical Journal Clinical Research Ed.* 1982;**285**:863-5.  
42  
43 48. Jarrett MH. Family matters. Parent partners: a parent-to-parent support program in the NICU  
44 part II: program implementation. *Pediatric Nursing* 1996;**22**:142-4, 149.  
45  
46  
47  
48 49. Cobiella CW, Mabe PA, Forehand RL. A comparison of two stress-reduction treatments for  
49 mothers of neonates hospitalized in a neonatal intensive care unit. *Children's Health Care*  
50 1990;**19**:93-100.  
51  
52 50. Jotzo M, Poets CF. Helping parents cope with the trauma of premature birth: an evaluation of a  
53 trauma-preventive psychological intervention. *Pediatrics* 2005;**115**:915-9.  
54  
55  
56  
57 51. Macnab AJ, Beckett LY, Park CC, Sheckter L. Journal writing as a social support strategy for  
58 parents of premature infants: a pilot study. *Patient Education & Counseling* 1998;**33**:149-59.  
59  
60 52. Zeanah CH, Canger CI, Jones JD. Clinical approaches to traumatized parents: psychotherapy  
in the intensive-care nursery. *Child Psychiatry & Human Development* 1984;**14**:158-69.

- 1  
2  
3  
4  
5  
6  
7 53. Huckabay LM. The effect on bonding behavior of giving a mother her premature baby's picture. *Scholarly Inquiry for Nursing Practice* 1999;**13**:349-62.  
8  
9  
10 54. Griffin T, Kavanaugh K, Soto CF, White M. Parental evaluation of a tour of the neonatal  
11 intensive care unit during a high-risk pregnancy. *JOGNN - Journal of Obstetric, Gynecologic, &*  
12 *Neonatal Nursing* 1997;**26**:59-65.  
13  
14  
15 55. Koh T, Butow P, Coorey M, Budge D, Collie L, Whitehall J, Tattersal M. Provision of taped  
16 conversations with neonatologists to mothers of babies in intensive care: randomised controlled  
17 trial. *BMJ* 2007;**334**:28 (6 January).  
18  
19 56. Penticuff JH, Arheart KL. Effectiveness of an intervention to improve parent-professional  
20 collaboration in neonatal intensive care. *Journal of Perinatal & Neonatal Nursing* 2005;**19**:187-  
21 202.  
22  
23  
24  
25 57. Piecuch RE, Roth RS, Clyman RI, Sniderman SH, Riedel PA, Ballard RA. Videophone use  
26 improves maternal interest in transported infants. *Critical Care Medicine* 1983;**11**:655-6.  
27  
28 58. Jones L Woodhouse D, Rowe J. Effective nurse-parent communications: A study of parents  
29 perceptions in the NICU environment. *Patient Education and Counseling* 2007;**69**, 206-212  
30  
31  
32  
33 59. Fenwick J, Barclay L, Schmied V. "Chatting". An important tool for facilitating mothering in the  
34 neonatal nursery. *Journal of Advanced Nursing* 2001; **33**(5), 583-593.  
35  
36  
37 60. Freer Y, Lyon A,  
38 Stenson B, Coyle C. BabyLink – improving communication among clinicians and with parents  
39 with babies in intensive care *British Journal of Healthcare Computing and Information*  
40 *Management*. 2005, **22**(2): 34-36  
41  
42  
43  
44 61. Koh TH, Jarvis C. Promoting effective communication in neonatal intensive care units by  
45 audiotaping doctor-parent conversations. *International Journal of Clinical Practice* 1998;**52**:27-9.  
46  
47 62. Brown KA, Sauve RS. Evaluation of a caregiver education program: home oxygen therapy for  
48 infants. *JOGNN: Journal of Obstetric, Gynecologic, and Neonatal Nursing* 1994;**23**:429-35.  
49  
50  
51  
52 63. Costello A, Bracht M, Van Camp K, Carman L. Parent information binder: individualizing  
53 education for parents of preterm infants. *Neonatal Network - Journal of Neonatal Nursing*  
54 1996;**15**:43-6.  
55  
56 64. Gannon BA. Caring one day at a time. *Neonatal Network: The Journal of Neonatal Nursing*  
57 2000;**19**:25-32.  
58  
59  
60 65. Drake E. Discharge teaching needs of parents in the NICU. *Neonatal Network - Journal of*  
*Neonatal Nursing* 1995;**14**:49-53.

- 1  
2  
3  
4  
5  
6  
7  
8  
9  
10  
11  
12  
13  
14  
15  
16  
17  
18  
19  
20  
21  
22  
23  
24  
25  
26  
27  
28  
29  
30  
31  
32  
33  
34  
35  
36  
37  
38  
39  
40  
41  
42  
43  
44  
45  
46  
47  
48  
49  
50  
51  
52  
53  
54  
55  
56  
57  
58  
59  
60
66. Kowalski W, Leef K, Mackley L, Spear M, Locke R. Communicating with parents of premature infants: How is the informant. *Journal of perinatology* 2006, 26, 44-48.
67. Barrera ME, Rosenbaum PL, Cunningham CE. Early home intervention with low-birth-weight infants and their parents. *Child Development* 1986;**57**:20-33.
68. Ortenstrand A, Winbladh B, Nordstrom G, Waldenstrom U. Early discharge of preterm infants followed by domiciliary nursing care: parents' anxiety, assessment of infant health and breastfeeding.[see comment]. *Acta Paediatrica* 2001;**90**:1190-5.
69. Broedsgaard A, Wagner L. How to facilitate parents and their premature infant for the transition home. *International Nursing Review* 2005;**52**:196-203.
70. Jonsson L, Fridlund B. Parents' conceptions of participating in a home care programme from NICU: a qualitative analysis. *Vard I Norden***23**:35-9.
71. Costello A, Chapman J. Mothers' perceptions of the care-by-parent program prior to hospital discharge of their preterm infants. *Neonatal Network - Journal of Neonatal Nursing* 1998;**17**:37-42.
72. Bennett R, Sheridan C. Mothers' perceptions of 'rooming-in' on a neonatal intensive care unit. *Infant* 2005;**1**:171-4.
73. Spiker D, Ferguson J, Brooks G. Enhancing maternal interactive behavior and child social competence in low birth weight, premature infants. *Child development* 1993;**64**:754-68.
74. Ross GS. Home intervention for premature infants of low-income families. *American Journal of Orthopsychiatry* 1984;**54**:263-70.
75. Leonard BJ, Scott SA, Sootsman J. A home-monitoring program for parents of premature infants: a comparative study of the psychological effects. *Journal of Developmental & Behavioral Pediatrics* 1989;**10**:92-7.
76. Kurz H, Neunteufl R, Eichler F, Urschitz M, Tiefenthaler M. Does professional counseling improve infant home monitoring? Evaluation of an intensive instruction program for families using home monitoring on their babies. *Wiener Klinische Wochenschrift* 2002; **114**:801-6.
77. Resnick MB, Armstrong S, Carter RL. Developmental intervention program for high-risk premature infants: effects on development and parent-infant interactions. *Journal of Developmental & Behavioral Pediatrics* 1988;**9**:73-8.
78. Langley D, Hollis S, MacGregor D. Parents' perceptions of neonatal services within the community: a postal survey. *Journal of Neonatal Nursing* 1999;**5**:7-11.

- 1  
2  
3  
4  
5  
6  
7 79. Isaacs PC. Teaching parents with high-risk infants in the home. *Patient Counselling & Health Education* 1980;**2**:84-6.  
8  
9  
10 80. Swanson SC,.Naber MM. Neonatal integrated home care: nursing without walls. *Neonatal Network - Journal of Neonatal Nursing* 1997;**16**:33-8.  
11  
12  
13  
14  
15 81. Rycroft-Malone J, Seers K, Titchen A, Harvey G, Kitson A,  
16 McCormack B. What counts as evidence in evidence-based practice?  
17 *Journal of Advanced Nursing* 2004; **47**(1): 81–90  
18  
19 82. Staniszewska S, West Meeting the patient partnership agenda:the challenge for health care  
20 workers. *International Journal for Quality in Health Care* 2004; Volume 16, Number 1: pp. 3–5  
21  
22  
23  
24  
25  
26  
27  
28  
29  
30  
31  
32  
33  
34  
35  
36  
37  
38  
39  
40  
41  
42  
43  
44  
45  
46  
47  
48  
49  
50  
51  
52  
53  
54  
55  
56  
57  
58  
59  
60

1  
2  
3  
4  
5  
6  
7  
8  
9  
10  
11  
12  
13  
14  
15  
16  
17  
18  
19  
20  
21  
22  
23  
24  
25  
26  
27  
28  
29  
30  
31  
32  
33  
34  
35  
36  
37  
38  
39  
40  
41  
42  
43  
44  
45  
46  
47  
48  
49  
50  
51  
52  
53  
54  
55  
56  
57  
58  
59  
60

**Figures and Tables**

For peer review only

1  
2  
3  
4  
5  
6  
7  
8  
9  
10  
11  
12  
13  
14  
15  
16  
17  
18  
19  
20  
21  
22  
23  
24  
25  
26  
27  
28  
29  
30  
31  
32  
33  
34  
35  
36  
37  
38  
39  
40  
41  
42  
43  
44  
45  
46  
47  
48  
49  
50  
51  
52  
53  
54  
55  
56  
57  
58  
59  
60

Figure 1: The results from the literature search.

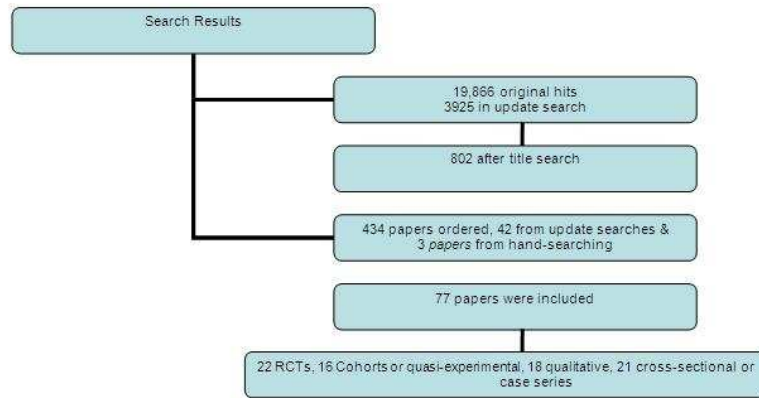

209x137mm (96 x 96 DPI)

Review only

Figure 2: Individualised developmental and behavioural care programmes

- 1) COPE<sup>(4)</sup> (Creating Opportunities for Parent Empowerment) provides an educational programme for parents at the neonatal unit on the appearance and behavioural characteristics of pre-term infants, how parents can participate in their infant's care, and how parents can make more positive interactions with their infant.
  - 2) NIDCAP<sup>(11,12,13)</sup> (Neonatal Individualised Developmental Care and Assessment Programme) is an intervention that stimulates pre-term infants and improves the interaction between mothers and infants
  - 3) MITP (Mother-Infant Transaction Programme)<sup>(14,15,16)</sup> helps to enable the parents to appreciate their infant's unique characteristics, temperament, and developmental potential, sensitising parents to their infant's cues so that they can respond appropriately.
  - 4) NCATS (Nursing Child Assessment Teaching Scale) NCATS (Nursing Child Assessment Teaching Scale)<sup>(17)</sup>: Examines the mother-child relationship in conjunction with teaching mothers how to interact with the baby, teaching behavioural cues, how to play etc
- NB:** While the developmental care programmes are designed to improve the development of the baby, these interventions give parents psychological support and practical guidance on how to care for their infants. |

Figure 2: Summary of POPPY Systematic Review - Pre neonatal

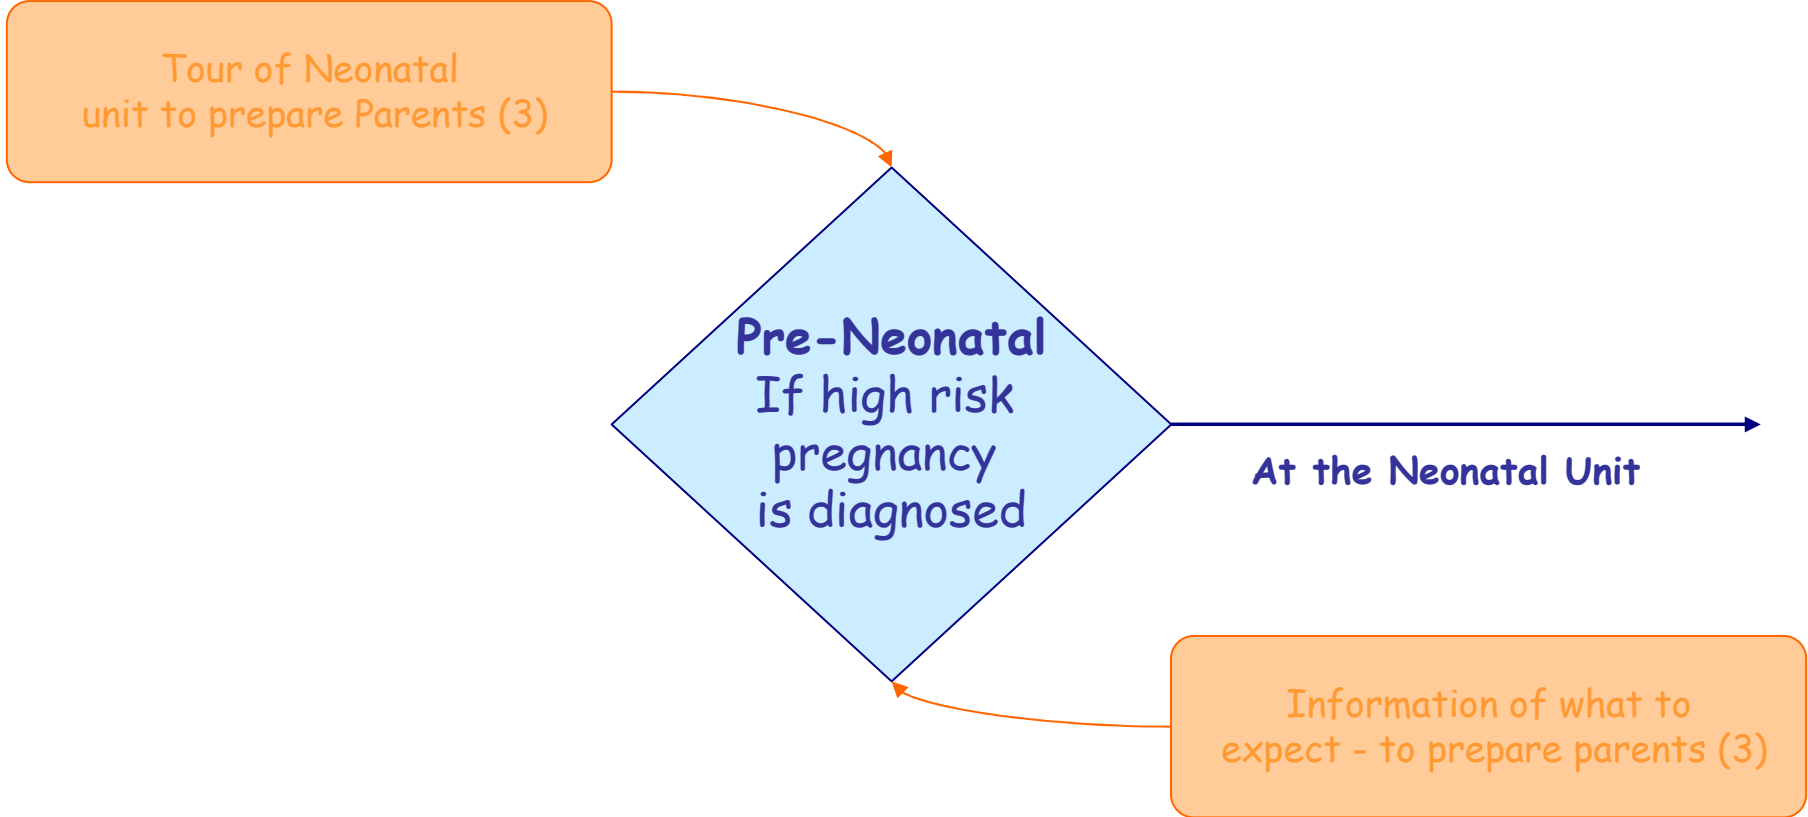

1  
2  
3  
4  
5  
6  
7  
8  
9  
10  
11  
12  
13  
14  
15  
16  
17  
18  
19  
20  
21  
22  
23  
24  
25  
26  
27  
28  
29  
30  
31  
32  
33  
34  
35  
36  
37  
38  
39  
40  
41  
42  
43  
44  
45  
46  
47  
48  
49



# Summary of POPPY Systematic Review - Interventions at the Neonatal Unit

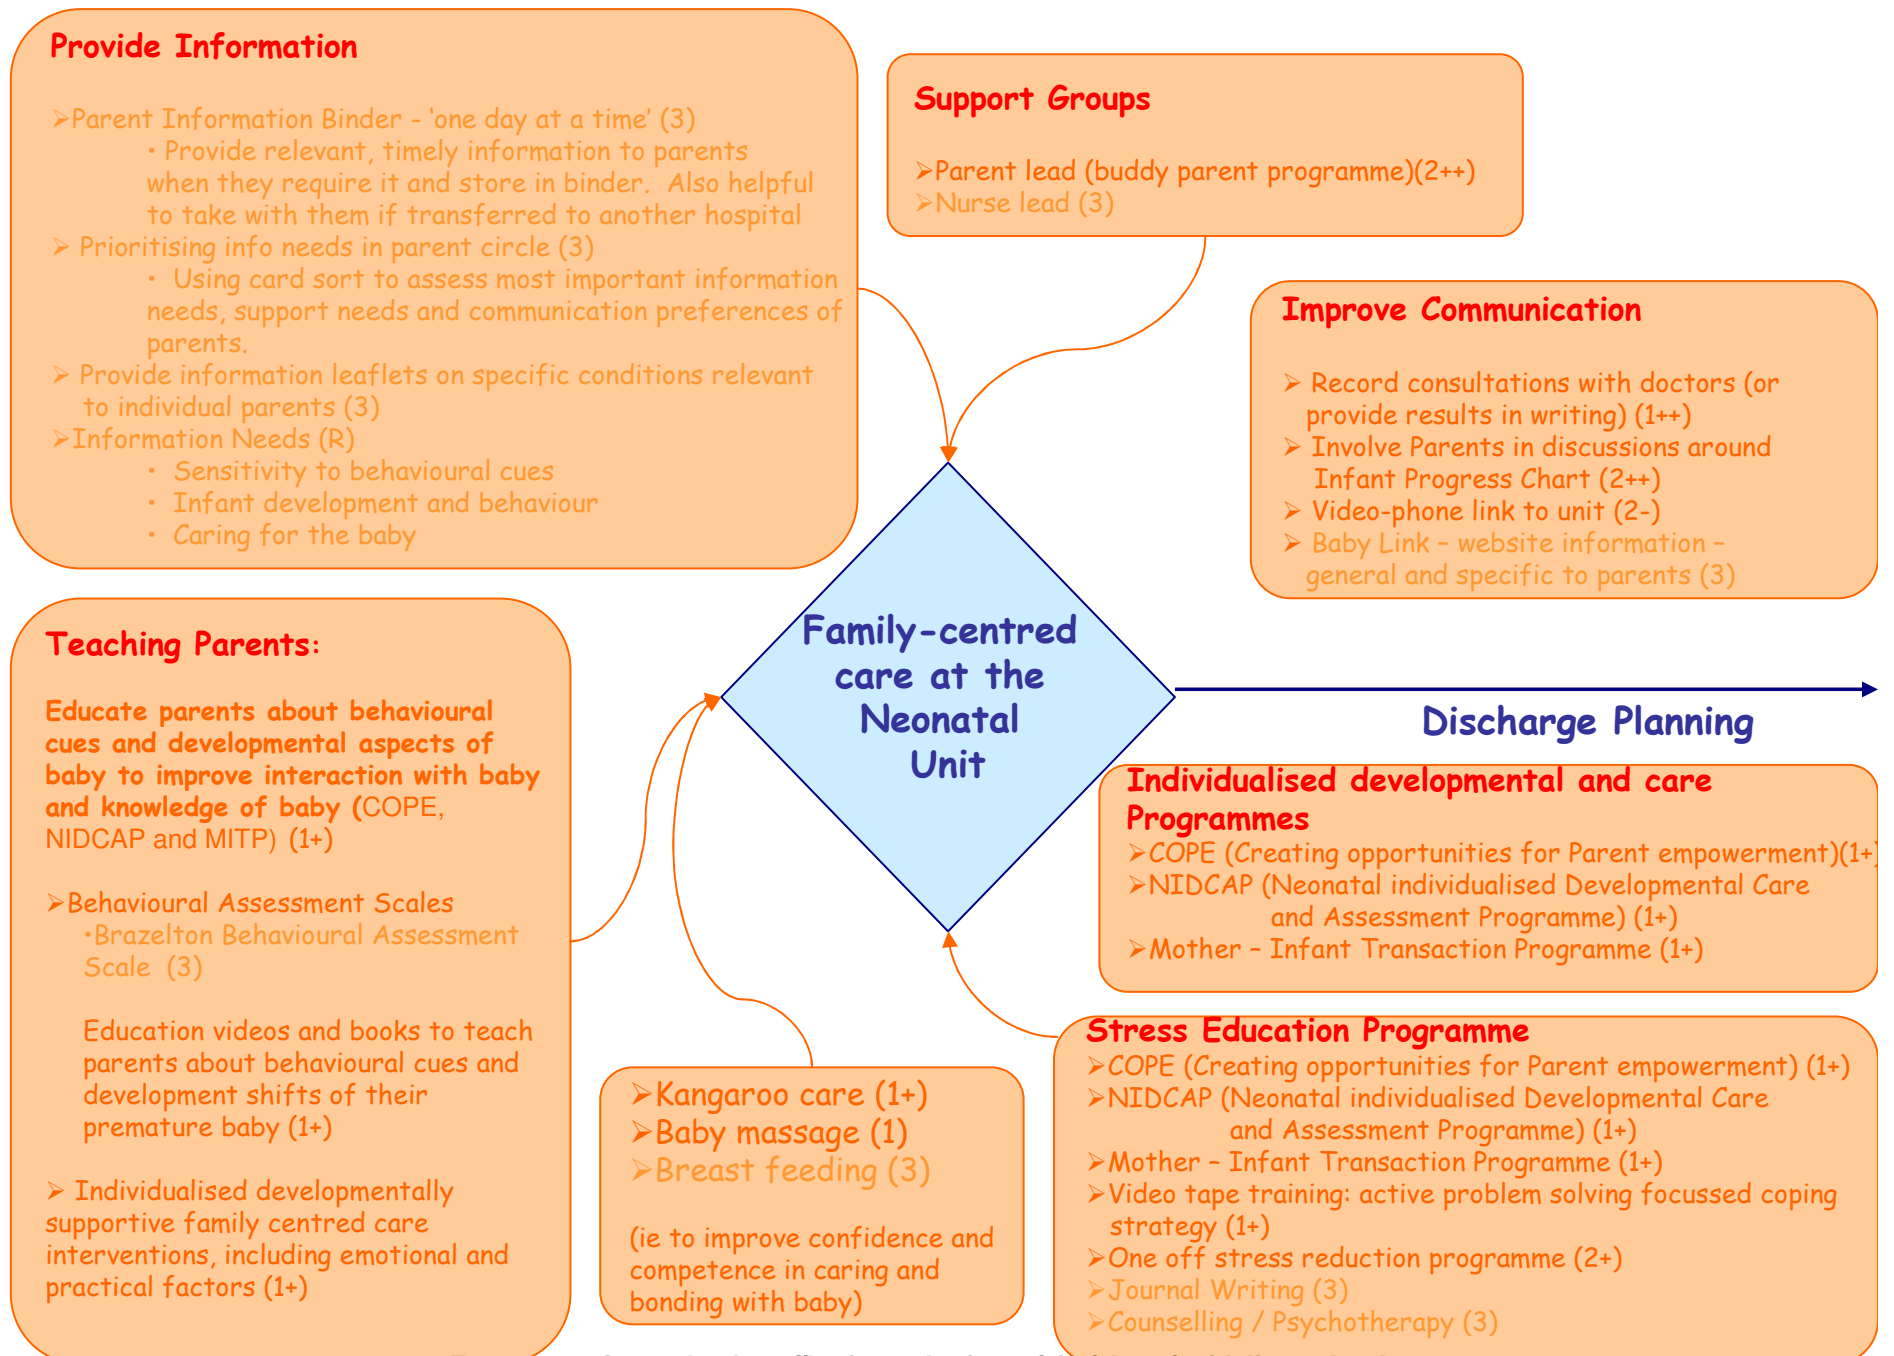

## Summary of POPPY Systematic Review - Interventions at Discharge

### Discharge Planning Programme

(Reduce stress of returning home, improve parent-baby interactions, improve home environment for baby)

1. Parent - Infant interventions (to improve parent - infant interactions and improve the home environment) (1+)
2. Early discharge with domiciliary nursing (2+)
3. Educational programme for Parents; visit and orientation from a Health Visitor linked to the unit; multidisciplinary and cross-sector discharge conference; provision of appropriate booklets / leaflets for Parents. (3)
4. Care by Parent discharge programme - mothers / parents stay overnight with their infant in the same room and assumes all care for the baby, but help is available if needed. (3)

Discharge

Home Care

## Summary of POPPY Systematic Review – Interventions for Home Care Programmes

### Community Neonatal Service

Community neonatal nurses assist parents in practical and emotional issues at home as required. Telephone Service available to parents to call when needed. Aimed at high risk parents (3)

### Structured home-visiting programme

(E.g. teaching caretaking skills, games and exercises to do with baby, coping skills for parents)

#### Examples:

*Spiker / Klebanov - 3 Visits per month in year 1; 1.5 visits per month in years 2 and 3 (1+)*

*Barrera: 1-2 visits a week for 4 months; then every other week for 5-8 months and monthly for last 3 months of the year (1+)*

*Ross: 2 visits a month for first 3 months, then 1 visit a month up to 12 months (2+)*

*Isaacs: 2 visits a month for first 3 months, then 1 visit a month up to 12 months (3)*

### Home Care

### Home-monitoring Programme (2+)

1  
2  
3  
4  
5  
6  
7  
8  
9  
10  
11  
12  
13  
14  
15  
16  
17  
18  
19  
20  
21  
22  
23  
24  
25  
26  
27  
28  
29  
30  
31  
32  
33  
34  
35  
36  
37  
38  
39  
40  
41  
42  
43  
44  
45  
46  
47  
48  
49

## SIGN Level of evidence

- 1++ = High-quality meta-analyses, systematic reviews of RCTs, or RCTs with a very low risk of bias
- 1+ = Well-conducted meta-analyses, systematic reviews of RCTs, or RCTs with a low risk of bias
- 1–Meta-analyses, systematic reviews of RCTs, or RCTs with a high risk of bias\*
- 2++ = High-quality systematic reviews of case–control or cohort studies High-quality case–control or cohort studies with a very low risk of confounding, bias, or chance and a high probability that the relationship is causal
- 2+ = Well-conducted case–control or cohort studies with a low risk of confounding, bias, or chance and a moderate probability that the relationship is causal
- 2– = Case–control or cohort studies with a high risk of confounding bias, or chance and a significant risk that the relationship is not causal\*
- 3 = Non-analytic studies (for example, case reports, case series)
- 4 = Expert opinion, formal consensus
- R= non-systematic review

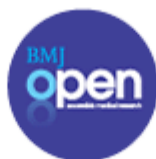

**A systematic review of interventions for communicating with, supporting and providing information to parents of pre-term infants**

|                               |                                                                                                                                                                                                   |
|-------------------------------|---------------------------------------------------------------------------------------------------------------------------------------------------------------------------------------------------|
| Journal:                      | <i>BMJ Open</i>                                                                                                                                                                                   |
| Manuscript ID:                | BMJ Open-2010-000023.R1                                                                                                                                                                           |
| Article Type:                 | Research                                                                                                                                                                                          |
| Date Submitted by the Author: | 07-Feb-2011                                                                                                                                                                                       |
| Complete List of Authors:     | Brett, Jo; Warwick University<br>Staniszewska, Sophie<br>Newburn, Mary; Warwick University<br>Jones, Nicola; Warwickshire NCT Pre-term Support Group<br>Taylor, Lesley; National Childbirth Trust |
| <b>Subject Heading</b>:       | Paediatrics                                                                                                                                                                                       |
| Keywords:                     | NEONATOLOGY, Community child health < PAEDIATRICS, Social Health                                                                                                                                  |
|                               |                                                                                                                                                                                                   |

SCHOLARONE™  
Manuscripts

only

1  
2  
3  
4  
5  
6  
7  
8  
9  
10  
11  
12  
13  
14  
15  
16  
17  
18  
19  
20  
21  
22  
23  
24  
25  
26  
27  
28  
29  
30  
31  
32  
33  
34  
35  
36  
37  
38  
39  
40  
41  
42  
43  
44  
45  
46  
47  
48  
49  
50  
51  
52  
53  
54  
55  
56  
57  
58  
59  
60

## **A systematic review of interventions for communicating with, supporting and providing information to parents of pre-term infants**

Jo Brett\*, Sophie Staniszewska,\* Mary Newburn,\*\* Nicola Jones,\*\*\* Lesley Taylor \*\*

\* Jo Brett

Royal College of Nursing Research Institute,

School of Health and Social Studies,

University of Warwick, Coventry, CV4 7AL

Tel: 024761 50622

[J.Brett@warwick.ac.uk](mailto:J.Brett@warwick.ac.uk)

POPPY website: <http://www.poppy-project.org.uk/>

Sophie Staniszewska

[Sophie.Staniszewska@warwick.ac.uk](mailto:Sophie.Staniszewska@warwick.ac.uk) – as above

\*\*Mary Newburn

National Childbirth Trust

Alexandra House, Oldham Terrace, London

W3 6NH

Tel: 0844 243 6000

[m\\_newburn@national-childbirth-trust.co.uk](mailto:m_newburn@national-childbirth-trust.co.uk)

1  
2  
3 Lesley Taylor  
4

5 [Lesley.taylor@automedia.ltd.uk](mailto:Lesley.taylor@automedia.ltd.uk) – as above  
6  
7  
8  
9

10 Nicola Jones  
11

12 Parent Representative  
13

14 \*\*\* Warwickshire NCT Pre-term Support Group  
15

16 No fixed address  
17  
18

19 nicola@scott-jones.net  
20  
21  
22  
23  
24  
25  
26  
27  
28  
29  
30  
31  
32  
33  
34  
35  
36  
37  
38  
39  
40  
41  
42  
43  
44  
45  
46  
47  
48  
49  
50  
51  
52  
53  
54  
55  
56  
57  
58  
59  
60

## Abstract

**Background and Objective:** The birth of a pre-term infant can be an overwhelming experience of guilt, fear, and helplessness for parents. Provision of interventions to support and engage parents in the care of their infant may improve outcomes for both the parents and the infant. The objective of this systematic review is to identify and map out effective interventions for communication with, supporting and providing information for parents of pre-term infants.

**Design:** Systematic searches were conducted in the electronic databases Medline, Embase, PsychINFO, the Cochrane library, CINHAL, MIDIRS, HMIC, and HELMIS. Hand-searching of reference lists and journals was conducted. Studies were included if they provided parent-reported outcomes of interventions relating to information, communication, and/or support for parents of pre-term infants prior to the birth, during care at the NICU, and after going home with their pre-term infant.

Titles and abstracts were read for relevance and papers judged to meet inclusion criteria were included. Papers were data extracted, quality assessed and a narrative summary was conducted in line with the York Centre for Reviews and Dissemination guidelines.

**Studies reviewed:** 72 papers identified, 19 papers were randomised controlled trials, 16 were cohort or quasi-experimental studies, 37 were non-intervention studies.

**Results:** Interventions for supporting, communicating with, and providing information to parents that have had a premature infant are reported. Parents report



1  
2  
3 feeling supported through individualised developmental and behavioural care  
4 programmes, through being taught behavioural assessment scales, and through  
5 breast feeding, kangaroo care and baby massage programmes. Parents also felt  
6 supported through organised support groups and through provision of an  
7 environment where parents can meet and support each other. Parental stress may  
8 be reduced through individual developmental care programmes, through  
9 psychotherapy, through interventions that teach emotional coping skills and active  
10 problem solving, and journal writing.  
11  
12  
13  
14  
15  
16  
17  
18  
19  
20  
21  
22  
23

24 Evidence reports the importance of preparing parents for the neonatal unit through  
25 the neonatal tour, and the importance of good communication throughout the infant  
26 admission phase and after discharge home. Providing individual web-based  
27 information about the infant, recording doctor-patient consultations, and provision of  
28 an information binder may also improve communication with parents.  
29  
30  
31  
32  
33  
34  
35  
36  
37  
38

39 The importance of thorough discharge planning throughout the infant's admission  
40 phase and the importance of home support programmes are also reported.  
41  
42  
43  
44  
45

46 **Conclusion:** The paper reports evidence of interventions that help support,  
47 communicate with and inform parents who have had a premature infant throughout  
48 the admission phase of the infant, discharge, and returning home. The level of  
49 evidence reported is mixed, and this should be taken into account when developing  
50 policy. A summary of interventions from the available evidence is reported.  
51  
52  
53  
54  
55  
56  
57  
58  
59  
60

**Article focus:**

1  
2  
3 A systematic mapping review to identify and synthesize evidence of effective  
4 interventions for communicating with, supporting and providing information for  
5  
6  
7  
8  
9  
10  
11  
12  
13  
14  
15  
16  
17  
18  
19  
20  
21  
22  
23  
24  
25  
26  
27  
28  
29  
30  
31  
32  
33  
34  
35  
36  
37  
38  
39  
40  
41  
42  
43  
44  
45  
46  
47  
48  
49  
50  
51  
52  
53  
54  
55  
56  
57  
58  
59  
60

A systematic mapping review to identify and synthesize evidence of effective interventions for communicating with, supporting and providing information for parents of pre-term infants.

### **Key messages:**

- The review highlights the importance of encouraging and involving parents in the care of their pre-term infant at the neonatal unit to enhance their ability to cope with and improve their confidence in caring for the infant, which may also lead to improved infant outcomes and reduced length of stay at the neonatal unit.
- Interventions for supporting parents included: 1) involving parents in individualised developmental and behavioural care programmes (e.g. COPE, NIDCAP, MITP) and behavioural assessment programmes; 2) breastfeeding, kangaroo care and infant massage programmes; 3) support forums for parents; 4) interventions to alleviate parental stress; 5) preparation of parents for various stages, for example seeing their infant for the first time, preparing to go home; 6) home support programmes.
- Involving parents in the exchange of information with and between health professionals is important, with various modes of providing this information reported, for example ward rounds with doctors, discussion around infant notes, websites, and hard copy information.

### **Strengths and limitations of study:**

Strengths

1  
2  
3 This is the first review to synthesize the evidence of interventions to support parents  
4 of pre-term infants through improved provision of information, improved  
5  
6 communications between parents and health professionals and alleviation of stress  
7  
8 at all stages of a parents journey through the neonatal unit. It highlights relatively  
9  
10 inexpensive interventions that can be integrated into their pathway through the  
11  
12 neonatal unit and going home, enhancing parental coping, and potentially improving  
13  
14 infant outcomes and reducing the infants length of stay at the neonatal unit.  
15  
16  
17  
18  
19  
20  
21

## 22 Limitations

23  
24 The quality of the evidence that this review reports is variable, and includes all types  
25  
26 of study designs.  
27  
28  
29  
30  
31  
32  
33  
34  
35  
36  
37  
38  
39  
40  
41  
42  
43  
44  
45  
46  
47  
48  
49  
50  
51  
52  
53  
54  
55  
56  
57  
58  
59  
60

## Introduction

While medical advances mean that very premature neonates have an increasingly better chance of survival, the impact of this experience on the child and their parents cannot be underestimated. The birth of a pre-term infant can be an intensely stressful, confusing and difficult time for parents and families<sup>(1)</sup>. Parents can have feelings of fear about their infant's condition or doubt in their ability to care for the child. Parents may also experience anger or grief, or they may blame themselves and experience intense guilt. Once mothers have returned home, hospital visits to see their baby can be difficult if coping with other siblings and travelling long distances to the neonatal unit<sup>(2)</sup>. It is therefore not surprising that mothers of pre-term babies experience significantly higher levels of post-natal depression than mothers of healthy full-term infants<sup>(3)</sup>. Fathers, who are often the main source of comfort and support for their wives, report feeling powerless to help, and often feel isolated from their infant as the health professionals focus on the infant and mother<sup>(4)</sup>.

Furthermore, while going home with their infant can be a time of joy and relief for these parents, bringing home a fragile infant and caring for them on your own for the first time can be a worrying time, causing additional stress for the parents.

Reducing parent stress and introducing interventions to improve parents confidence and ability to care for their premature infant at the neonatal unit and after

1  
2  
3  
4  
5  
6  
7  
8  
9  
10  
11  
12  
13  
14  
15  
16  
17  
18  
19  
20  
21  
22  
23  
24  
25  
26  
27  
28  
29  
30  
31  
32  
33  
34  
35  
36  
37  
38  
39  
40  
41  
42  
43  
44  
45  
46  
47  
48  
49  
50  
51  
52  
53  
54  
55  
56  
57  
58  
59  
60

returning home can improve outcomes for parents and their child, reduce the length of stay at the neonatal unit<sup>(5,6)</sup> and reduce the re-admittance to hospital<sup>(7)</sup>.

The Parents of Premature Babies (POPPY) study aims to develop a better understanding of the experiences of a range of parents with pre-term babies, particularly with regards to the communication, information and support they received on the NICU, ensuring that the perspectives of parents are at the heart of the study<sup>(8)</sup>. This paper reports the results of the first phase of the POPPY study, which takes the form of a systematic review to identify effective interventions for communicating with, supporting and providing information for parents of pre-term babies.

## Methods

Systematic searches were undertaken for the period of January 1980 to October 2006 in the following databases: Medline, Embase, PsychINFO, the Cochrane library, CINHALL, MIDIRS, HMIC, and HELMIS (see table 1 for search strategy). A combination of text terms and MeSH terms were used to maximise the volume of literature retrieved. Grey literature was sought from specialists in the field, and the following journals were hand-searched from 1990 onwards for all relevant English language articles: Neonatal Network Journal, Journal of Neonatal Nursing and Journal of Obstetric, Gynecologic, and Neonatal Nursing. Update searches were undertaken in October 2009.

Studies were included if they met the inclusion criteria:

- Outcomes reported by parents who have had a premature infant (i.e.  $\leq 36$  weeks gestation).
- Provided parent-reported outcomes of interventions relating to information provision at the neonatal unit and after discharge.
- Provided parent-reported outcomes of interventions relating to communication with health professionals at the neonatal unit and after discharge.
- Provided parent-reported outcomes of interventions relating to provision of support at the neonatal unit and after discharge.
- Design of study was: RCTs, Quasi experimental, cohort, case-control, cross-sectional, case series, case reports, or qualitative
- Studies were relevant to that of developed countries

- Passed quality assessment
- Published between January 1980 to October 2009
- English language

Studies were excluded in the met the exclusion criteria

- Reported parent-reported outcomes of parents who had a sick full-term infant at the neonatal unit.
- Outcomes were not reported by parents (e.g. evaluation of parent intervention by health professionals)
- Editorials or opinions
- Study was fatally flawed
- Not English Language
- Published before Jan 1980

It was felt that the systematic review should be inclusive of all study designs as it is often not feasible or appropriate to conduct randomised control trials (RCTs) or other intervention studies on the outcomes for parents that were measured. We therefore set out to conduct a more realist review. A realist review is not a method or formula, but a logic of enquiry that is inherently pluralist and flexible, encompassing all types of study types. It seeks not to judge but to explain, and is driven by the question 'What works for whom in what circumstances and in what respects?' We wanted to identify what works for parents who have had a premature infant and at what part of their experience at the neonatal unit and after returning home. In practical terms,

1  
2  
3 the realist reviewer identifies and evaluates the programme theories that  
4  
5 implicitly or explicitly underlie families of interventions.  
6  
7  
8

9  
10 It was deemed therefore that, despite the potential bias inherent in  
11  
12 descriptive studies, the results of these studies nonetheless gave an important  
13  
14 insight into parent-related interventions and should be included in this review.  
15  
16

17  
18 The data extraction form and quality assessment for inclusion criteria were based on  
19  
20 the guideline from the NHS Centre for Reviews and Dissemination (NHS CRD)<sup>(9)</sup>  
21  
22 Initially, two reviewers extracted data (JB, SS) independently for 20% of papers and  
23  
24 disagreements were resolved by discussion with a third reviewer. There was a high  
25  
26 level of agreement between reviewers, so the remaining data was extracted by one  
27  
28 reviewer and checked by a second. Any disagreements were resolved by discussion  
29  
30 with a third reviewer. The quantitative studies covered a wide range of interventions  
31  
32 and different methods of assessment so it was not possible to carry out a meta-  
33  
34 analysis. A non-quantitative synthesis was conducted based on the extracted data.  
35  
36 In the summary figure (Figure 2), the included evidence was assessed using the  
37  
38 Scottish Intercollegiate Guidelines Assessment (SIGN)<sup>(10)</sup>.  
39  
40  
41  
42  
43  
44  
45  
46  
47  
48  
49  
50  
51  
52  
53  
54  
55  
56  
57  
58  
59  
60



## Search Results

### Figure 1: The results from the literature search.

Seventy two papers were included (four were deemed relevant in two of the sections). Papers were excluded for a number of reasons including the fact that no parent outcome was identified, the study was irrelevant to neonatal services offered in developed countries such as the UK (3), or the study was deemed to be fatally flawed (11)

Tables 2a and 2b report the data from the randomised control trials, quasi experimental studies and cohort studies. Non-intervention studies are reported in table 2c.

## Results

Interventions for supporting parents included: 1) individualised developmental and behavioural care programmes<sup>(4,11,12,13,14,15,16,17)</sup> (e.g. COPE, NIDCAP, MITP – see below); 2) behavioural assessment scales; 3) breastfeeding, kangaroo care and infant massage programmes; 4) support forums for parents; 5) the alleviation of parental stress; 6) preparing parents for seeing their infant for the first time; 7) communication and information sharing; 8) discharge planning; and 9) home support programmes.

## 1) Supporting parents through individualised developmental and behavioural care programmes

### *Figure 2: Individualised developmental and behavioural care programmes*

Fourteen studies reported individualised developmental and behavioural care programmes, of which nine were RCTs (see Table 1a). The RCT evidence (1++ & 1+) suggested that the involvement of parents in an individualised developmental and behavioural care programme significantly reduced the maternal stress created by the NICU environment and the demands of their infant<sup>(4,11,14,16,18,19)</sup>. This intervention also significantly improved the parental understanding of their infant and their interactions with their infant<sup>(4)</sup>.

Recent RCT evidence suggested that the introduction of the NIDCAP intervention had not significantly changed levels of parental stress, confidence or nursing support. However, the outcomes were measured only 1-2 weeks after the baby was born (Van der Pal 2007, 1+)<sup>(12)</sup>. The introduction of the NCATS programme in the NICU made no significant difference to parental stress levels and maternal-infant interactions when assessed at discharge and at three months after discharge (Glazebrook et al. 2007, 1+)<sup>(20)</sup>. One RCT found that coaching parents on how to interact with their pre-term infant made no difference to knowledge of care, sensitivity to the infant or satisfaction in parenting compared with the control group (Parker-Loewen 1987, 1-)<sup>(21)</sup>. However, this may have been confounded by the amount of contact that the control mothers had with the researchers, as these mothers reported that they enjoyed having someone show an interest in them.

1  
2  
3  
4  
5  
6 Evidence from a cohort reported that the Vermont Mother-Infant Transaction  
7  
8 Programme (MITP) significantly improved maternal satisfaction, maternal self-  
9  
10 confidence, and mothers' perception of their infant's temperament at six months<sup>(15)</sup>.  
11  
12 One cohort study reported that individualised developmental care programmes  
13  
14 appeared to make no difference to parents' perceptions of the neonatal unit or  
15  
16 satisfaction with care, despite significantly lowering stress cues in the pre-term  
17  
18 infants<sup>(22)</sup>.  
19  
20  
21  
22  
23  
24

25 Evidence from qualitative studies provides an insight into the benefits of  
26  
27 individualised developmental and behavioural care programmes at the neonatal  
28  
29 unit, such as empowering parents to take care of their infants, teaching parents  
30  
31 behavioural cues of their infants, problem-solving, and learning how to interact with  
32  
33 their infants, resulting in a greater satisfaction with the care provided<sup>(13,23,24)</sup>.  
34  
35  
36 Furthermore, parents reported a reduction in stress after such programmes and said  
37  
38 that they felt more confident in caring for their infants, which promoted parental self-  
39  
40 reliance when returning home<sup>(24)</sup>.  
41  
42  
43  
44  
45

## 46 **2) Supporting parents through use of Behavioural Assessment Scales**

47  
48  
49

50  
51 No RCT evidence was reported on this intervention. Three cross-sectional  
52  
53 studies provided insights into how to teach parents assess and interpret the  
54  
55 behaviour of their pre-term through using the Brazelton Behavioural Assessment  
56  
57 scales. The studies reported this intervention may improve mother-infant bonding,  
58  
59  
60

1  
2  
3 reduce maternal anxiety, and help mothers foster a more realistic perception of their  
4  
5 pre-term infants<sup>(25,26,27)</sup>.  
6  
7

### 8 9 10 **3) Supporting parents through breast feeding, kangaroo care and infant** 11 **massage** 12 13

14  
15  
16  
17 Four studies reported on parent outcomes of interventions around breast-  
18 feeding, of which one was a RCT, six studies reported on parent outcomes of  
19 interventions around kangaroo care (skin to skin contact with baby out of the  
20 incubator), of which 2 were RCTs, and two studies reported parent outcomes  
21 around baby massage, (see Table 1c). An RCT (1-) reported no significant  
22 difference in the mother's confidence and competence in carrying out breast feeding  
23 by weighing the infant before and after feeds<sup>(28)</sup>.  
24  
25  
26  
27  
28  
29  
30  
31  
32  
33

34  
35  
36 Three cross-sectional studies and one case series study reported on breast  
37 feeding interventions. The studies reported that parents receiving breastfeeding  
38 support at the neonatal unit were more likely to continue breastfeeding up to a  
39 month after discharge than comparable groups. Breast-feeding education and  
40 support at the neonatal unit in the form of counselling, information (handouts and  
41 videos), practical help and group breast-feeding clinics improved the confidence of  
42 mothers in breast-feeding. An individualised discharge plan for breast feeding  
43 mothers with follow-up telephone calls or home visits appeared to maintain mothers'  
44 confidence in breastfeeding, and provide reassurance<sup>(29,30,31)</sup>  
45  
46  
47  
48  
49  
50  
51  
52  
53  
54  
55  
56  
57  
58  
59  
60

1  
2  
3 Six studies reported parent outcomes of using kangaroo care with their pre-  
4 term infants, of which two were RCTs. The RCT evidence (1+) suggests that use of  
5 kangaroo care significantly reduces maternal anxiety around her infant, gives the  
6 mother a significantly greater sense of competence with their infant, and a  
7 significantly greater sensitivity towards her infant<sup>(32)</sup>. Furthermore, RCT evidence (1+)  
8 suggests that music during kangaroo care resulted in significantly lower maternal  
9 anxiety<sup>(33)</sup>.

10  
11  
12  
13  
14  
15  
16  
17  
18  
19  
20  
21  
22 One cohort study, which assessed outcomes of mothers using kangaroo care  
23 at 37 weeks, at 3 months, and at 6 months, reported significantly better levels of  
24 mother-infant interaction, more touch, better adaptation to infant cues, and better  
25 perception of their infant at all time periods. Mothers also reported significantly less  
26 post-natal depression compared to the controls at 37 weeks<sup>(34)</sup>.

27  
28  
29  
30  
31  
32  
33  
34  
35  
36 One cross-sectional study reported that the majority of mothers preferred the  
37 kangaroo method, mainly because their baby was closer to them. Touch was  
38 important to mothers, as it induced feelings of well-being and fulfilment in parents<sup>(35)</sup>.

39  
40  
41  
42  
43  
44  
45  
46  
47  
48  
49  
50  
51  
52  
53  
54  
55  
56  
57  
58  
59  
60  
61  
62  
63  
64  
65  
66  
67  
68  
69  
70  
71  
72  
73  
74  
75  
76  
77  
78  
79  
80  
81  
82  
83  
84  
85  
86  
87  
88  
89  
90  
91  
92  
93  
94  
95  
96  
97  
98  
99  
100  
101  
102  
103  
104  
105  
106  
107  
108  
109  
110  
111  
112  
113  
114  
115  
116  
117  
118  
119  
120  
121  
122  
123  
124  
125  
126  
127  
128  
129  
130  
131  
132  
133  
134  
135  
136  
137  
138  
139  
140  
141  
142  
143  
144  
145  
146  
147  
148  
149  
150  
151  
152  
153  
154  
155  
156  
157  
158  
159  
160  
161  
162  
163  
164  
165  
166  
167  
168  
169  
170  
171  
172  
173  
174  
175  
176  
177  
178  
179  
180  
181  
182  
183  
184  
185  
186  
187  
188  
189  
190  
191  
192  
193  
194  
195  
196  
197  
198  
199  
200  
201  
202  
203  
204  
205  
206  
207  
208  
209  
210  
211  
212  
213  
214  
215  
216  
217  
218  
219  
220  
221  
222  
223  
224  
225  
226  
227  
228  
229  
230  
231  
232  
233  
234  
235  
236  
237  
238  
239  
240  
241  
242  
243  
244  
245  
246  
247  
248  
249  
250  
251  
252  
253  
254  
255  
256  
257  
258  
259  
260  
261  
262  
263  
264  
265  
266  
267  
268  
269  
270  
271  
272  
273  
274  
275  
276  
277  
278  
279  
280  
281  
282  
283  
284  
285  
286  
287  
288  
289  
290  
291  
292  
293  
294  
295  
296  
297  
298  
299  
300  
301  
302  
303  
304  
305  
306  
307  
308  
309  
310  
311  
312  
313  
314  
315  
316  
317  
318  
319  
320  
321  
322  
323  
324  
325  
326  
327  
328  
329  
330  
331  
332  
333  
334  
335  
336  
337  
338  
339  
340  
341  
342  
343  
344  
345  
346  
347  
348  
349  
350  
351  
352  
353  
354  
355  
356  
357  
358  
359  
360  
361  
362  
363  
364  
365  
366  
367  
368  
369  
370  
371  
372  
373  
374  
375  
376  
377  
378  
379  
380  
381  
382  
383  
384  
385  
386  
387  
388  
389  
390  
391  
392  
393  
394  
395  
396  
397  
398  
399  
400  
401  
402  
403  
404  
405  
406  
407  
408  
409  
410  
411  
412  
413  
414  
415  
416  
417  
418  
419  
420  
421  
422  
423  
424  
425  
426  
427  
428  
429  
430  
431  
432  
433  
434  
435  
436  
437  
438  
439  
440  
441  
442  
443  
444  
445  
446  
447  
448  
449  
450  
451  
452  
453  
454  
455  
456  
457  
458  
459  
460  
461  
462  
463  
464  
465  
466  
467  
468  
469  
470  
471  
472  
473  
474  
475  
476  
477  
478  
479  
480  
481  
482  
483  
484  
485  
486  
487  
488  
489  
490  
491  
492  
493  
494  
495  
496  
497  
498  
499  
500  
501  
502  
503  
504  
505  
506  
507  
508  
509  
510  
511  
512  
513  
514  
515  
516  
517  
518  
519  
520  
521  
522  
523  
524  
525  
526  
527  
528  
529  
530  
531  
532  
533  
534  
535  
536  
537  
538  
539  
540  
541  
542  
543  
544  
545  
546  
547  
548  
549  
550  
551  
552  
553  
554  
555  
556  
557  
558  
559  
560  
561  
562  
563  
564  
565  
566  
567  
568  
569  
570  
571  
572  
573  
574  
575  
576  
577  
578  
579  
580  
581  
582  
583  
584  
585  
586  
587  
588  
589  
590  
591  
592  
593  
594  
595  
596  
597  
598  
599  
600  
601  
602  
603  
604  
605  
606  
607  
608  
609  
610  
611  
612  
613  
614  
615  
616  
617  
618  
619  
620  
621  
622  
623  
624  
625  
626  
627  
628  
629  
630  
631  
632  
633  
634  
635  
636  
637  
638  
639  
640  
641  
642  
643  
644  
645  
646  
647  
648  
649  
650  
651  
652  
653  
654  
655  
656  
657  
658  
659  
660  
661  
662  
663  
664  
665  
666  
667  
668  
669  
670  
671  
672  
673  
674  
675  
676  
677  
678  
679  
680  
681  
682  
683  
684  
685  
686  
687  
688  
689  
690  
691  
692  
693  
694  
695  
696  
697  
698  
699  
700  
701  
702  
703  
704  
705  
706  
707  
708  
709  
710  
711  
712  
713  
714  
715  
716  
717  
718  
719  
720  
721  
722  
723  
724  
725  
726  
727  
728  
729  
730  
731  
732  
733  
734  
735  
736  
737  
738  
739  
740  
741  
742  
743  
744  
745  
746  
747  
748  
749  
750  
751  
752  
753  
754  
755  
756  
757  
758  
759  
760  
761  
762  
763  
764  
765  
766  
767  
768  
769  
770  
771  
772  
773  
774  
775  
776  
777  
778  
779  
780  
781  
782  
783  
784  
785  
786  
787  
788  
789  
790  
791  
792  
793  
794  
795  
796  
797  
798  
799  
800  
801  
802  
803  
804  
805  
806  
807  
808  
809  
810  
811  
812  
813  
814  
815  
816  
817  
818  
819  
820  
821  
822  
823  
824  
825  
826  
827  
828  
829  
830  
831  
832  
833  
834  
835  
836  
837  
838  
839  
840  
841  
842  
843  
844  
845  
846  
847  
848  
849  
850  
851  
852  
853  
854  
855  
856  
857  
858  
859  
860  
861  
862  
863  
864  
865  
866  
867  
868  
869  
870  
871  
872  
873  
874  
875  
876  
877  
878  
879  
880  
881  
882  
883  
884  
885  
886  
887  
888  
889  
890  
891  
892  
893  
894  
895  
896  
897  
898  
899  
900  
901  
902  
903  
904  
905  
906  
907  
908  
909  
910  
911  
912  
913  
914  
915  
916  
917  
918  
919  
920  
921  
922  
923  
924  
925  
926  
927  
928  
929  
930  
931  
932  
933  
934  
935  
936  
937  
938  
939  
940  
941  
942  
943  
944  
945  
946  
947  
948  
949  
950  
951  
952  
953  
954  
955  
956  
957  
958  
959  
960  
961  
962  
963  
964  
965  
966  
967  
968  
969  
970  
971  
972  
973  
974  
975  
976  
977  
978  
979  
980  
981  
982  
983  
984  
985  
986  
987  
988  
989  
990  
991  
992  
993  
994  
995  
996  
997  
998  
999  
1000

In the qualitative studies, parents described how kangaroo care helped them to get to know their infant, increased their confidence, and made them feel that their infant needed them<sup>(36)</sup>; parents reported that their mood was improved, that they perceived their infant differently and felt a stronger sense of identifying with their infant<sup>(37)</sup>.

Two studies reported on parent outcomes of baby massage on pre-term infants, of which one was an RCT (see Table 1d). RCT evidence (1+) reported that

1  
2  
3 at three months, mothers of massaged infants felt significantly less intrusive towards  
4 caring for their baby, interactions were more reciprocal, and treated infants were  
5 more socially involved compared to controls<sup>(38)</sup>. One cross-sectional study also  
6 reported improved maternal-infant interactions<sup>(39)</sup>.  
7  
8  
9  
10  
11  
12  
13  
14  
15  
16  
17  
18

#### 19 **4) Support forums for parents**

20  
21  
22  
23 No RCT evidence was reported for these interventions. Nine studies reported  
24 the benefits of participating in support groups set up within the NICU, either run by  
25 staff at the neonatal unit or by parents who have experienced having a pre-term  
26 infant themselves. Evidence from cohort studies reported that parent-led peer  
27 support groups at the NICU led to mothers in the intervention group having  
28 significantly less stress at four weeks and 16 weeks after support was initiated at the  
29 neonatal unit<sup>(40,41)</sup>. Mothers of critically ill pre-term infants had significantly better  
30 maternal mood states, maternal-infant relationships, and home environments in the  
31 intervention group compared to the control group<sup>(42)</sup>.  
32  
33  
34  
35  
36  
37  
38  
39  
40  
41  
42  
43  
44  
45  
46  
47  
48  
49

50 Evidence from a qualitative study gave insights into how a health professional  
51 led support group assisted parents to gain perspective, feel supported, and learn  
52 practical information about how to interact with their baby<sup>(43)</sup>. Qualitative evidence  
53 also reports that parent-to-parent support groups provided parents with information,  
54 emotional support, and strength<sup>(44)</sup>. Cross-sectional studies and case series studies  
55 reported on how health professional led support groups also helped to relieve  
56  
57  
58  
59  
60

1  
2  
3 anxiety, gave an opportunity to communicate with staff, and gain confidence in their  
4 parenting skills<sup>(45,46,47)</sup>. Another case series study reported how a support programme  
5 run by parents gave parents space to express their worries and concerns and  
6 provided comfort in talking to 'experienced' parents<sup>(48)</sup>.  
7  
8  
9  
10  
11  
12  
13  
14  
15  
16  
17

## 18 **5) Alleviating parent stress**

19  
20 Seven studies report interventions that attempt to alleviate the adverse  
21 psycho-social consequences of having a pre-term infant, of which four were RCTs.  
22 RCT evidence (1+ - 1++) is reported in the individualised developmental behavioural  
23 programme section for the stress reduction benefits of COPE, NIDCAP, and  
24 MITP<sup>(4,11,14,16)</sup>. Other RCT evidence (1-) reports that the use of videotape in  
25 strategies that focus on coping with emotions and active problem solving  
26 significantly reduced maternal stress<sup>(49)</sup>.  
27  
28  
29  
30  
31  
32  
33  
34  
35  
36  
37  
38

39 Evidence from a cohort study reported that the use of one-off psychological  
40 interventions to teach relaxation and coping mechanisms to normalise their  
41 experience, as well as emotional and practical support significantly reduced the  
42 traumatic impact for parents compared to controls<sup>(50)</sup>. Two case series studies gave  
43 insights into the use of journal writing for documenting feelings, thoughts, milestones  
44 and involvement in care; the use of psychotherapy to offer support and insight at a  
45 time of crisis was also found to reduce stress<sup>(51,52)</sup>.  
46  
47  
48  
49  
50  
51  
52  
53  
54  
55  
56  
57

## 58 **6) Preparing parents for seeing their infant the neonatal unit for the first time**

1  
2  
3 Two studies reported evidence for different ways of preparing parents for  
4 seeing their pre-term infant for the first time, of which one was an RCT<sup>(53,54)</sup>. The RCT  
5 evidence (1+) reported that giving parents a photograph of their pre-term infant  
6 provides a positive effect by improving bonding with their infant<sup>(53)</sup>.  
7  
8  
9  
10  
11  
12  
13  
14

15 The qualitative study gave an insight into how a tour of the neonatal unit prior  
16 to having a pre-term infant (when a pregnancy at high risk of premature labour was  
17 diagnosed) may decrease parent's fears, inspire hope in their infant's prognosis,  
18 and give parents reassurance about the care offered at the NICU<sup>(54)</sup>. However, some  
19 parents found the appearance of the babies and the technology overwhelming, and  
20 some expressed concerns that the tour was not supported by staff on the neonatal  
21 unit.  
22  
23  
24  
25  
26  
27  
28  
29  
30  
31  
32  
33  
34

### 35 **7) Interventions for communication and information sharing**

36 Eight studies assessed interventions to improve the issues of communication  
37 at the neonatal unit, of which one was a RCT<sup>(55)</sup>. The RCT evidence (1+) reported  
38 that taping parent-doctor consultations improved the recall of parents of the  
39 consultation<sup>(55)</sup>. The trial found that mothers who received audiotapes of their  
40 consultation recalled significantly more information about the diagnosis, treatment,  
41 and outcome of their children than women in the control group at ten days and at  
42 four months.  
43  
44  
45  
46  
47  
48  
49  
50  
51  
52  
53  
54  
55

56 Evidence from a cohort study reported that discussions between health  
57 professionals and parents around their infant's progress chart resulted in the  
58 intervention group having significantly fewer unrealistic concerns, less uncertainty  
59  
60



1  
2  
3 about the medical condition of the infant, less conflict and a greater satisfaction with  
4 regards to shared decision-making<sup>(56)</sup>. Another cohort study reported that parents  
5 had significantly greater contact with the NICU during the infant's admission and  
6 reported a sense of relief at seeing their infant when they had access to the  
7 neonatal unit via a videophone<sup>(57)</sup>.  
8  
9  
10  
11  
12  
13  
14  
15  
16

17  
18 Qualitative evidence investigated the perception of parents regarding the  
19 methods of effective and ineffective communication at the NICU. Parents perceived  
20 that the most effective communication with nurses was through discourse  
21 management (nurses asking questions and encouraging parents to ask questions),  
22 caring and reassuring communication, and communication as equal partners in the  
23 care of the infant. Ineffective communication was perceived as when the  
24 information given was inconsistent, staff did not check if parents understood the  
25 information, and if questions were not allowed<sup>(58)</sup>. Furthermore, qualitative evidence  
26 reported that 'chat' or 'social talk' between nurses and parents had a positive  
27 influence on mothers' confidence, their sense of control, and their feeling of  
28 connection with their baby<sup>(59)</sup>.  
29  
30  
31  
32  
33  
34  
35  
36  
37  
38  
39  
40  
41  
42  
43  
44  
45

46 Cross-sectional studies provided an insight into the methods of improving  
47 communication between parents of pre-term infants and health professionals. The  
48 use of a web-based programme (BabyLink ) to provide individualised information to  
49 parents helped communicate complex issue, and parents reported that it helped to  
50 humanise the experience of the neonatal unit<sup>(60)</sup>. Furthermore, a study reported that  
51 the use of BabyLink improved the overall satisfaction of the family with care at the  
52 neonatal unit and actually reduced the length of stay at the neonatal unit<sup>(6)</sup>. Parents  
53  
54  
55  
56  
57  
58  
59  
60

1  
2  
3 reported that they found the tape-recorded consultations with doctors helpful to  
4  
5 process the information, as well as being comforting and supportive<sup>(61)</sup>.  
6  
7  
8

9  
10 Five studies reported evidence on the information needs of parents, none of  
11  
12 which provided RCT level evidence. One pre-test/post-test study concluded that  
13  
14 information and training for specific practical care of their infant on oxygen therapy  
15  
16 could significantly improve the relevant knowledge of parents, and reduced their  
17  
18 distress when entering the transition period of returning home<sup>(62)</sup>.  
19  
20  
21

22  
23  
24 Three qualitative studies described an information binder that provided  
25  
26 relevant information about medical and practical issues relating to the NICU.  
27  
28 Parents could add information to the folder. The information binder empowered  
29  
30 parents to take an active interest in acquiring relevant information about their infant  
31  
32 and improved parents understanding and ability to participate in decision-making.  
33  
34 Furthermore, the information binder increased parent's confidence in caring for their  
35  
36 infant, and gave them hope of progress for their infant<sup>(63, 64)</sup>. Prioritising information  
37  
38 through a "card sort" (cards which state information topics for parents who have had  
39  
40 a pre-term infant) was reported by a qualitative study as being a less intimidating  
41  
42 way for parents to access important and timely information<sup>(65)</sup>. This study reported  
43  
44 that parents' highest priorities were infant cardiopulmonary resuscitation (CPR),  
45  
46 infant illness and development; information with a moderate priority were feeding,  
47  
48 giving medication, and hygiene; and information topics that were given the lowest  
49  
50 priority included getting help at home and the use of car seats. One cross-sectional  
51  
52 study reported that the neonatal nurses were the best source of information at the  
53  
54 NICU<sup>(66)</sup>.  
55  
56  
57  
58  
59  
60

## 8) Discharge planning

1  
2  
3  
4  
5  
6  
7  
8  
9  
10  
11  
12  
13  
14  
15  
16  
17  
18  
19  
20  
21  
22  
23  
24  
25  
26  
27  
28  
29  
30  
31  
32  
33  
34  
35  
36  
37  
38  
39  
40  
41  
42  
43  
44  
45  
46  
47  
48  
49  
50  
51  
52  
53  
54  
55  
56  
57  
58  
59  
60

Six studies reported on discharge programmes, of which one reported RCT level evidence<sup>(67)</sup>. RCT evidence (1-) suggests that a parent-infant discharge programme within a therapeutic problem-solving model significantly improved parent interactions with their infants, and parents were significantly more engaged with their infants after returning home compared with the parents who did not go through a discharge programme<sup>(67)</sup>.

One cohort study assessed an early discharge programme with an individualised care and discharge plan, followed by domiciliary nursing care, and reported significantly less anxiety in mothers in the intervention group at discharge<sup>(68)</sup>. No significant differences in the experiences of parents with regards to their infant's emotional well-being and breast feeding issues were reported. The levels of anxiety did not appear to be different between groups of parents who did not receive a formal discharge programme at one year after discharge from the neonatal unit<sup>(68)</sup>.

The qualitative studies gave insights into how discharge planning provided support for parents. One study conducted a discharge programme that comprised of an educational programme during the period of hospitalisation for parents with pre-term infants, a visit and orientation about the neonatal unit by the family's health visitor, a multidisciplinary and cross-sector discharge conference, and the publication of relevant booklets for parents and health care providers<sup>(69)</sup>. The

1  
2  
3 parents found that most of the intervention initiatives contributed to a feeling of  
4  
5 overall increased support and met their needs, including improving their confidence  
6  
7 in caring for their pre-term infant and ensuring the well-being of their child following  
8  
9 discharge. Families valued the support and guidance they received from the co-  
10  
11 ordinating health visitor, and valued having a named contact nurse throughout their  
12  
13 stay at the neonatal unit and at home, which demonstrated the importance of  
14  
15 continuity of care. All participants in this study felt secure when they returned home.  
16  
17  
18  
19  
20  
21

22 One qualitative study assessed the perceptions of parents of pre-term infants  
23  
24 regarding an early discharge and home-care programme<sup>(70)</sup>. The study concluded  
25  
26 that parents of children who were discharged early may feel more positive about  
27  
28 coming home as early as possible from the hospital, as this may help parents to feel  
29  
30 like a 'normal' family and not to have to share their infant with the nurses and other  
31  
32 health professionals on the neonatal unit. However, parents in this study  
33  
34 appreciated the 24 hour accessibility of the staff on the neonatal unit for support and  
35  
36 knowledge.  
37  
38  
39  
40  
41  
42

43 Two further qualitative studies reports a Care by Parent discharge  
44  
45 programme and describes how the mother can stay in the same room or in a room  
46  
47 close to her pre-term infant, assuming all of the aspects of care but with help at  
48  
49 hand if needed<sup>(71,72)</sup>. Mothers reported that it gave them the opportunity to test  
50  
51 reality and bridge the gap between hospital and home, so gaining confidence in  
52  
53 taking their infant home, and it helped mothers to feel like a proper family, and  
54  
55 promoted their "ownership" of the infant.  
56  
57  
58  
59  
60

## 9) Home support programmes

Ten studies reported the outcomes of parents who participated in home intervention programmes, of which two were RCTs. RCT evidence (1-) reported that home support programmes, where parents are visited and given emotional and practical support regularly for the first year and for up to three years afterwards, lead to significantly reduced parental stress levels, a greater positive effect on maternal behaviour and greater interactions with their pre-term infant. However, the intervention was not significantly associated with improved maternal coping<sup>(73)</sup>. RCT evidence also reports that regular home support programmes that last for up to a year made mothers significantly more responsive to their infant and meant that they were able to provide more appropriate and varied stimulations for the infant<sup>(67)</sup>.

Evidence from a cohort study where parents were visited regularly and taught care-taking skills, games and exercises reported a significantly better home environment for the family. However, there was no difference found between the intervention group and the control group with regards to maternal coping<sup>(74)</sup>.

Evidence from a cohort study also assessed the support and psychological impact of an Infants Apnea Evaluation Programme (IAEP) for infants on home monitors and reported that monitoring itself significantly reduced anxiety. The structured support programme was found to be supportive by parents<sup>(75)</sup>. A similar cohort study introduced a home counselling programme for parents who used home monitoring. Parents were significantly less stressed by the presence of the monitor and by false alarms, and reacted less aggressively to monitor alarms. Parents in the structured support programme used the monitor less, and mainly during sleeping periods<sup>(76)</sup>. One cohort conducted an educational developmental programme at home twice

1  
2  
3 monthly using a parent's voice tape, baby massage, and a passive range of motion  
4 and exercise. The programme resulted in a significant improvement in parent-infant  
5 interaction at six months and 12 months after discharge, as well as benefiting the  
6 infant<sup>(77)</sup>.  
7  
8  
9

10  
11  
12  
13  
14  
15 Evidence from a cohort study reported that a home healthcare programme  
16 and home visiting programme significantly improved the home environment of the  
17 intervention groups compared to the control groups at one month and 12 months<sup>(5)</sup>.  
18 However, there were no significant differences between groups with regard to family  
19 experiences and parental satisfaction.  
20  
21  
22  
23  
24  
25  
26  
27

28  
29 Evidence from one cross-sectional study and two case series studies give  
30 insights into the effect of home support programmes. Specific to the UK, the  
31 community neonatal service (CNS) was valued positively in providing support and  
32 continuity of care for parents who needed a high level of support (e.g. experiencing  
33 depression and bonding struggles with their infant, infant sleeping issues and  
34 feeding problems)<sup>(78)</sup>. One study assessed the impact of an intensive care co-  
35 ordinator who provided home visits for providing teaching, guidance and support to  
36 parents<sup>(79)</sup>. The study reported that the intensive care co-ordinator made families  
37 feel comfortable, offering emotional and practical support, and taught parents the  
38 necessary skills for parenting the pre-term infant. Another similar study assessed a  
39 neonatal integrated home care programme where neonatal nurses taught specific  
40 infant care needs and provided emotional support to parents. Parents reported that  
41 the programme helped them to bring their pre-term infants home earlier, provided  
42 nurse help, support, instruction and encouragement<sup>(80)</sup>.  
43  
44  
45  
46  
47  
48  
49  
50  
51  
52  
53  
54  
55  
56  
57  
58  
59  
60

## Discussion

The aim of this systematic review focused on identifying interventions that were effective in supporting, informing and communicating with parents who have had a pre-term infant. This study has identified a range of interventions that can produce beneficial outcomes for parents in relation to communication, information and support.

RCT evidence reports that developmental and behavioural care programmes such as COPE and MITP significantly reduce stress and depression in mothers of premature infants, significantly increase mothers' knowledge of her infant's condition and care (COPE) and significantly improved mothers attitude and confidence in caring for their infant (MITP). COPE and MITP performed better than other such programmes because they were developed to improve both mother and infant outcomes, whereas other developmental programmes focussed more on infant outcomes. Such interactive learning programmes appear to be more successful at reducing mother's stress and improving mother's knowledge than stand alone coaching sessions for parents.

Other RCT evidence reported that skin to skin care and baby massage significantly improved the mother-infant interaction and increased the mother's sense of competence in handling their infant. These are inexpensive interventions that can be introduced relatively easily to most NICUs.

1  
2  
3 Perhaps more controversial RCT evidence reports that recording parent's  
4 consultations with their doctors significantly improved the parent's recall of  
5 diagnosis, treatment and outcomes of their infant. However, in our growing  
6 litigious society, doctors may be reluctant to do this.  
7  
8  
9  
10  
11

12  
13  
14  
15 Cohort evidence reports the benefits of several interventions including  
16 discussions around the infant progress chart, parent support groups at the  
17 neonatal unit and home support programmes once the infant has been  
18 discharged. The non-intervention studies further added to the review by bring  
19 a wider breadth of information around the beneficial experiences of  
20 developmental care programmes, educational interventions, preparation for  
21 visiting the neonatal unit, and interventions to reduce parent's stress, that  
22 might not have been reported within an RCT design.  
23  
24  
25  
26  
27  
28  
29  
30  
31  
32  
33

34  
35  
36 Important messages have come through this research, which healthcare  
37 professionals and neonatal units should consider. Some neonatal units may have  
38 already utilised some of these interventions, but we would urge them to use the  
39 results of this systematic review to re-evaluate current practice around parents of  
40 premature infants and consider whether unit and professional practice requires  
41 adaptation or change. Changing practice can be difficult and a number of key  
42 elements are required, including evidence, an understanding of the context of care  
43 and a way of facilitating this evidence into practice<sup>(81)</sup>. We also acknowledge that  
44 part of the context is a complex range of workforce issues that limits what neonatal  
45 units can achieve, despite their best efforts. The focus on developing patient-  
46  
47  
48  
49  
50  
51  
52  
53  
54  
55  
56  
57  
58  
59  
60



1  
2  
3 centred care within the NHS in the UK also applies to neonatal units and should  
4  
5 include parent-focused care as an extension of this concept<sup>(82)</sup>.  
6  
7  
8  
9

10 Many of the interventions that have been identified in this study could be  
11 described as being building blocks for a family-centred model of care in the UK  
12 setting, which embraces the mother and father or significant others in the medical  
13 care of their infant. Such interventions act through establishing key actions and  
14 interventions that emphasise the importance of communicating with, supporting and  
15 informing the family. Furthermore, our review demonstrated that such family-centred  
16 interventions resulted in shorter stays at the neonatal units, less re-hospitalisation of  
17 pre-term infants and better long-term outcome with regards to morbidity in this group  
18 of infants<sup>(4)</sup>. This contributes to a strong argument that highlights the potential for  
19 family-centred care to be made more cost-effective, more acceptable to parents,  
20 and in some cases offer important clinical benefits.  
21  
22  
23  
24  
25  
26  
27  
28  
29  
30  
31  
32  
33  
34  
35  
36  
37

38 The scope of this review was very broad, and the searches were  
39 therefore developed to be inclusive. This resulted in the search being  
40 sensitive, but not specific. Furthermore, this systematic review includes  
41 intervention studies and non-intervention studies. It is implicit that the non-  
42 interventional studies will bring bias to the evidence base. We have therefore  
43 stratified the summary of results into RCTs and non RCTs, with the non-RCTs  
44 being stratified further within observational designs by study design (ie.,  
45 cohort, case-control, cross-sectional, etc). It was important to include the non-  
46 interventional studies as much of the literature around parents' views and  
47 experiences does not lend itself to the RCT design. Being inclusive of studies  
48  
49  
50  
51  
52  
53  
54  
55  
56  
57  
58  
59  
60

1  
2  
3 benefits the evidence base by bringing together 'experience' studies in a  
4 systematic way gaining a greater breadth of perspectives and a deeper  
5 understanding of issues from the point of view of those targeted by the  
6 interventions.  
7  
8  
9  
10  
11

12 The Scottish intercollegiate group network (SIGN) grading system used in  
13 this review is intended to place greater weight on the quality of evidence, and to  
14 emphasise that the body of evidence should be considered as a whole, and not rely  
15 on a single study. It is also intended to allow more weight to be given to  
16 recommendations supported by the good quality observational studies where RCTs  
17 are not available for practical or ethical reasons, as shown in figure 4.  
18  
19  
20  
21  
22  
23  
24  
25  
26  
27  
28

29 The majority of studies included in this review are from the USA, which may  
30 affect the generalisation of interventions in neonatal units today and the ability of  
31 such studies to be applied in a UK practice setting would need to be considered.  
32 While this review identified a range of interventions that can help parents, certain  
33 groups were under-represented in the study samples, including amongst others  
34 minority ethnic groups, individuals from lower social classes and young parents.  
35 Further good quality research within a UK setting, and research on under-  
36 represented groups of parents at the neonatal units is needed.  
37  
38  
39  
40  
41  
42  
43  
44  
45  
46  
47  
48  
49

50 Despite the limitations of the evidence-base, this systematic review highlights  
51 interventions for providing improved support, information and communication to  
52 parents of a pre-term infant. These interventions are summarised in Figure 3.  
53  
54  
55  
56  
57  
58  
59  
60

#### Figure 4 Scottish Intercollegiate Guideline Network (SIGN) Levels of Evidence

Table 1:

## Search terms:

|                                                                                     |                                                                                                                                                                                                                                                                                                                                                                                                                                                                                                                                                                                                                                                                                                                                                                                                                                                                                                                                                                                                                                                                                                                                                                                                                                                                                                                                                                                                                                                                                                                                                                                                                                                                                                                                                                                     |
|-------------------------------------------------------------------------------------|-------------------------------------------------------------------------------------------------------------------------------------------------------------------------------------------------------------------------------------------------------------------------------------------------------------------------------------------------------------------------------------------------------------------------------------------------------------------------------------------------------------------------------------------------------------------------------------------------------------------------------------------------------------------------------------------------------------------------------------------------------------------------------------------------------------------------------------------------------------------------------------------------------------------------------------------------------------------------------------------------------------------------------------------------------------------------------------------------------------------------------------------------------------------------------------------------------------------------------------------------------------------------------------------------------------------------------------------------------------------------------------------------------------------------------------------------------------------------------------------------------------------------------------------------------------------------------------------------------------------------------------------------------------------------------------------------------------------------------------------------------------------------------------|
| <p>INTERVENTION MEDLINE<br/>1951-2006</p> <p>Search carried out 23 JAN<br/>2006</p> |   <ol style="list-style-type: none"> <li>1. SEARCH: INFORMATION-DISSEMINATION#.DE.</li> <li>2. SEARCH: INFORMATION OR INFORM\$ OR INFORMATION ADJ SEEKING ADJ BEHAVIOUR OR INFORMATION ADJ NEEDS OR PATIENT ADJ INFORMATION OR (PARENT ADJ INFORMATION).AB.</li> <li>3. SEARCH: ACCESS-TO-INFORMATION#.DE.</li> <li>4. SEARCH: (INFORMATION ADJ RESOURCES).AB.</li> <li>5. SEARCH: PATIENT-EDUCATION#.DE. OR PATIENT-EDUCATION-HANDOUT-PUBLICATION-TYPE#.DE.</li> <li>6. SEARCH: PATIENT-CARE-TEAM#.DE.</li> <li>7. SEARCH: COLLABORATI\$ OR JOINT ADJ WORKING OR TEAM.AB.</li> <li>8. SEARCH: COMMUNICATION#.W..DE. OR COMMUNICATION-BARRIERS#.DE.</li> <li>9. SEARCH: COMMUNICATION.AB.</li> <li>10. SEARCH: (INFORMATION ADJ SERVICE).AB.</li> <li>11. SEARCH: EARLY-INTERVENTION-EDUCATION#.DE.</li> <li>12. SEARCH: SELF-HELP-GROUPS#.DE.</li> <li>13. SEARCH: SOCIAL-SUPPORT#.DE.</li> <li>14. SEARCH: HELPING-BEHAVIOR#.DE.</li> <li>15. SEARCH: HELP ADJ SEEKING ADJ BEHAVIOUR OR HELP.AB.</li> <li>16. SEARCH: SELF ADJ HELP OR (SELF ADJ HELP ADJ GROUPS).AB.</li> <li>17. SEARCH: ADVICE OR ADVISE OR ADVISORY.AB.</li> <li>18. SEARCH: INTERNET#.W..DE.</li> <li>19. SEARCH: COUNSELING#.W..DE. OR DIRECTIVE-COUNSELING#.DE.</li> <li>20. SEARCH: COGNITIVE-THERAPY#.DE. OR THERAPY-COMPUTER-ASSISTED#.DE. OR NONDIRECTIVE-THERAPY#.DE.</li> <li>21. SEARCH: PSYCHOTHERAPY#.W..DE. OR PSYCHOTHERAPY-BRIEF#.DE.</li> <li>22. SEARCH: INTERNET OR WEB OR COUNSELING OR THERAP\$ OR PYSCHOTHERAPY.AB.</li> <li>23. SEARCH: HEALTH-EDUCATION#.DE.</li> <li>24. SEARCH: HEALTH ADJ EDUCATION OR</li> </ol> |
|-------------------------------------------------------------------------------------|-------------------------------------------------------------------------------------------------------------------------------------------------------------------------------------------------------------------------------------------------------------------------------------------------------------------------------------------------------------------------------------------------------------------------------------------------------------------------------------------------------------------------------------------------------------------------------------------------------------------------------------------------------------------------------------------------------------------------------------------------------------------------------------------------------------------------------------------------------------------------------------------------------------------------------------------------------------------------------------------------------------------------------------------------------------------------------------------------------------------------------------------------------------------------------------------------------------------------------------------------------------------------------------------------------------------------------------------------------------------------------------------------------------------------------------------------------------------------------------------------------------------------------------------------------------------------------------------------------------------------------------------------------------------------------------------------------------------------------------------------------------------------------------|

1  
2  
3  
4  
5  
6  
7  
8  
9  
10  
11  
12  
13  
14  
15  
16  
17  
18  
19  
20  
21  
22  
23  
24  
25  
26  
27  
28  
29  
30  
31  
32  
33  
34  
35  
36  
37  
38  
39  
40  
41  
42  
43  
44  
45  
46  
47  
48  
49  
50  
51  
52  
53  
54  
55  
56  
57  
58  
59  
60

- PATIENT ADJ EDUCATION OR (PARENT\$ ADJ EDUCATION).AB.
25. SEARCH: HEALTH ADJ EDUCATION OR PATIENT ADJ EDUCATION OR PARENT ADJ EDUCATION OR PARENTAL ADJ EDUCATION OR (PARENTS ADJ EDUCATION).AB.
26. SEARCH: MEETING OR VISIT OR OUTREACH OR OUTPATIENT OR TALK OR TRAINING OR LECTURE OR GUIDE OR GUIDANCE.AB.
27. SEARCH: LEAFLET OR BOOKLET OR POSTER OR PAMPHLET OR INFORMATION ADJ SHEET OR FREQUENTLY ADJ ASKED ADJ QUESTIONS OR DVD OR CD OR VIDEO OR CDROM OR COMPUTER.AB.
28. SEARCH: RESOURCE-GUIDES-PUBLICATION-TYPE#.DE.
29. SEARCH: AUDIOVISUAL-AIDS#.DE.
30. SEARCH: EDUCATIONAL-TECHNOLOGY#.DE.
31. SEARCH: 1 OR 2 OR 3 OR 4 OR 5 OR 6 OR 7 OR 8 OR 9 OR 10 OR 11 OR 12 OR 13 OR 14 OR 15 OR 16 OR 17 OR 18 OR 19 OR 20 OR 21 OR 22 OR 23 OR 24 OR 25 OR 26 OR 27 OR 28 OR 29 OR 30
32. SEARCH: COMMUNITY-INSTITUTIONAL-RELATIONS#.DE.
33. SEARCH: (HOME ADJ VISIT).AB.
34. SEARCH: GUIDE OR GUIDANCE.AB.
35. SEARCH: 32 OR 33 OR 34
36. SEARCH: 31 OR 35
37. SEARCH: INFANT-PREMATURE#.DE.
38. SEARCH: INFANT-LOW-BIRTH-WEIGHT#.DE.
39. SEARCH: INFANT-VERY-LOW-BIRTH-WEIGHT#.DE.
40. SEARCH: INTENSIVE-CARE-NEONATAL#.DE.
41. SEARCH: INTENSIVE-CARE-UNITS-NEONATAL#.DE.
42. SEARCH: (SPECIAL ADJ CARE ADJ BABY ADJ UNIT).AB.
43. SEARCH: SPECIAL ADJ CARE NEAR BABY.AB.
44. SEARCH: (PRETERM OR PREMATURE) NEAR (BABY OR BIRTH OR INFANT OR CHILD).AB.
45. SEARCH: EARLY NEAR (BABY OR BIRTH OR INFANT OR CHILD).AB.
46. SEARCH: 37 OR 38 OR 39 OR 40 OR 41 OR 42 OR 43 OR 44 OR 45

- 1  
2  
3  
4  
5  
6  
7  
8  
9  
10  
11  
12  
13  
14  
15  
16  
17  
18  
19  
20  
21  
22  
23  
24  
25  
26  
27  
28  
29  
30  
31  
32  
33  
34  
35  
36  
37  
38  
39  
40  
41  
42  
43  
44  
45  
46  
47  
48  
49  
50  
51  
52  
53  
54  
55  
56  
57  
58  
59  
60
- |  |  |                                                                                                                                                                                                                                                                                                                                                                                                                                                                                                                                                                                                                                                                                                                                                                                                              |
|--|--|--------------------------------------------------------------------------------------------------------------------------------------------------------------------------------------------------------------------------------------------------------------------------------------------------------------------------------------------------------------------------------------------------------------------------------------------------------------------------------------------------------------------------------------------------------------------------------------------------------------------------------------------------------------------------------------------------------------------------------------------------------------------------------------------------------------|
|  |  | <p>47. SEARCH: 36 AND 46</p> <p>48. SEARCH: PARENTS#.W..DE.</p> <p>49. SEARCH: MOTHERS#.W..DE.</p> <p>50. SEARCH: FATHERS#.W..DE.</p> <p>51. SEARCH: CAREGIVERS#.W..DE.</p> <p>52. SEARCH: MATERNITY NEXT PATIENT</p> <p>53. SEARCH: FAMILY.AB.</p> <p>54. SEARCH: 48 OR 49 OR 50 OR 51 OR 52 OR 53</p> <p>55. SEARCH: 47 AND 54</p> <p>56. SEARCH: 48 OR 49 OR 50 OR 51 OR 52</p> <p>57. SEARCH: INFORMATION OR INFORM\$ OR INFORMATION ADJ SEEKING ADJ BEHAVIOUR OR INFORMATION ADJ NEEDS OR (PARENT ADJ INFORMATION).AB.</p> <p>58. SEARCH: INFORMATION OR INFORM.AB.</p> <p>59. SEARCH: 1 OR 3 OR 4 OR 5 OR 6 OR 7 OR 8 OR 9 OR 10 OR 11 OR 12 OR 13 OR 14 OR 15 OR 16 OR 17 OR 18 OR 19 OR 20 OR 21 OR 22 OR 23 OR 24 OR 25 OR 26 OR 27 OR 28 OR 29 OR 30 OR 58</p> <p>60. SEARCH: 46 AND 56 AND 59</p> |
|--|--|--------------------------------------------------------------------------------------------------------------------------------------------------------------------------------------------------------------------------------------------------------------------------------------------------------------------------------------------------------------------------------------------------------------------------------------------------------------------------------------------------------------------------------------------------------------------------------------------------------------------------------------------------------------------------------------------------------------------------------------------------------------------------------------------------------------|
- For peer review only

Table 2: Data extraction tables

## 2a. Randomised controlled trials:

| Author (Year) Country        | Study design | Intervention                                                                              | Outcome measure                                                                                                                                                   | No of cases | No. of controls | Statistically significant                                                                                                                                                                                                                                                                                                                                                                                                                                                                                                                                                                                                                                                                                             | Quality (SIGN) |
|------------------------------|--------------|-------------------------------------------------------------------------------------------|-------------------------------------------------------------------------------------------------------------------------------------------------------------------|-------------|-----------------|-----------------------------------------------------------------------------------------------------------------------------------------------------------------------------------------------------------------------------------------------------------------------------------------------------------------------------------------------------------------------------------------------------------------------------------------------------------------------------------------------------------------------------------------------------------------------------------------------------------------------------------------------------------------------------------------------------------------------|----------------|
| Glazebrook et al 2007 UK     | RCT          | Nursing Child Assessment Teaching Scale (NCATS) at neonatal unit, with optional follow-up | Parental Stress Index (PSI)<br>Home Observation for Measurement of the Environment (HOME)                                                                         | 99          | 111             | No significant differences reported at discharge or at 3 months after discharge.                                                                                                                                                                                                                                                                                                                                                                                                                                                                                                                                                                                                                                      | 1+             |
| Koh 2007 Australia           | RCT          | Recording doctors consultation                                                            | Information recall<br><br>91% of mothers in the tape group listened to the tape (once by day 10, twice by four months, and three times by 12 months; range 1-10). | 93          | 93              | At 10 days and four months, mothers in the tape group recalled significantly more information about diagnosis, treatment and outcomes than control group.<br><br>Recall at 10 days: 1.35 (1.08 to 1.69) p<0.007, treatment 1.35 (1.00 to 1.84) and outcome 1.24 (1.05 to 1.47), p<0.009 than mothers in the control group.<br><br>Recall at 4 months: diagnosis 1.27 (0.99 to 1.63) p<0.05, treatment 1.35 (1.00 to 1.84) p<0.045, and outcome 1.75 (1.27 to 2.4), p<0.004<br><br>No statistically significant differences were found between the groups in satisfaction with conversations (10 days), postnatal depression and anxiety scores (10 days, four and 12 months), and stress about parenting (12 months). | 1+             |
| Van der Pal 2007 Netherlands | RCT          | NIDCAP                                                                                    | PSI<br>Parents of Mother and Baby Scale<br>Nurse Parent Support Tool                                                                                              | 94          | 84              | No significant differences were reported in Parental Stress Index, Confidence of parents, or perceived nursing support at 1 to 2 weeks after birth                                                                                                                                                                                                                                                                                                                                                                                                                                                                                                                                                                    | 1+             |
| Kaareisen 2006               | RCT          | Mother-Infant Transaction Program<br>The intervention consisted of 8 sessions shortly     | PSI                                                                                                                                                               | 71          | 69 preterm      | Early-intervention program reduces parenting stress in both mothers and fathers during the first year after a preterm birth                                                                                                                                                                                                                                                                                                                                                                                                                                                                                                                                                                                           | 1+             |

|                          |     |                                                                                                                                                                                                                  |                                                                                                                              |                           |                           |                                                                                                                                                                                                                                                                                                                                                                                                                                                                                                                                                                                                                                                  |     |
|--------------------------|-----|------------------------------------------------------------------------------------------------------------------------------------------------------------------------------------------------------------------|------------------------------------------------------------------------------------------------------------------------------|---------------------------|---------------------------|--------------------------------------------------------------------------------------------------------------------------------------------------------------------------------------------------------------------------------------------------------------------------------------------------------------------------------------------------------------------------------------------------------------------------------------------------------------------------------------------------------------------------------------------------------------------------------------------------------------------------------------------------|-----|
|                          |     | before discharge and 4 home visits by specially trained nurses focusing on the infant's unique characteristics, temperament, and developmental potential and the interaction between the infant and the parents. |                                                                                                                              |                           | 75 term                   | to a level comparable to their term peers<br><br>Mothers 6 mths - total stress: 16.9 (5.2 to 28.5) .005<br>Mothers 12mths – total stress: 13.7 (1.6 to 25.9) .03<br>Fathers 12 moths – total stress: 14.8 (2.1 to 27.6) .02                                                                                                                                                                                                                                                                                                                                                                                                                      |     |
| Lai<br>2006<br>Taiwan    | RCT | Effects of kangaroo care combined with music                                                                                                                                                                     | State-Trait Anxiety Inventory (STAI)                                                                                         | 15                        | 15                        | Music during KC also resulted in significantly lower maternal anxiety in the treatment group on day 3 of the interention (t (19.6) =-2.14, p<.05). Maternal state anxiety improved daily, indicating a cumulative dose effect (F(1.49,40.39)=5.81, p<.01). Anxiety levels in the control remained unchanged                                                                                                                                                                                                                                                                                                                                      | 1+  |
| Melnyk<br>2006<br>USA    | RCT | Creating Opportunities for Parent Empowerment (COPE) - Information and behavioural activities about appearance and behavioural characteristics of preterm infants and how best to parent them.                   | Infant length of stay<br>Parental Stressor Scale (PSS)<br>State-Trait Anxiety Scale (STAI)<br>Index of Parental Belief Scale | 147 Mothers<br>81 Fathers | 113 Mothers<br>73 Fathers | Mothers in the intervention group reported significantly less stress and less depression and anxiety at 2 months after birth.<br>Anxiety: 28.72 (27.31-30.12) vs 30.83 (29.23-32.42)p<0.05<br>Depression: 5.56 (4.66-6.45) vs 7.21 (6.20-8.23)p<0.02<br>PSS: 3.29 (3.09-3.49) vs 3.58 (3.35-3.80), p<0.05<br>Parental Knowledge: 32(31.63-33.01)vs 30.50 (29.73-31.27)p<0.001<br><br>There were no significant differences found for Fathers anxiety or depressive symptoms.<br>Infant length of stay at the NICU and at the hospital was significantly lower in the intervention group (3.8 days less in NICU, 3.9 days less in hospital p<0.05 | 1++ |
| Browne<br>2005<br>USA    | RCT | Family based intervention (Gp1: demonstration of pre-term baby behavioural cues; Gp2: viewed educational video and books about pre-term babies                                                                   | Nursing Child Assessment Scale (NCAFS) and Knowledge of Preterm Infant Behavior Scale (KPIB)                                 | Gp1: 28<br>Gp2: 31        | 25                        | Intervention group reported significantly greater sensitive interactions with pre-term babies, and significantly greater knowledge of pre-term babies than controls at 1 month after discharge<br><br>(NCAFS 45.65, 6.20vs. 47.43, 7.36 vs. 48.88, 7.41, p<0.05; mean KPIB 23.32, SD 5.88 in group 1 vs. 25.90, 5.30, in group 2 vs. 19.58, 5.01 in group 3, p<0.001)                                                                                                                                                                                                                                                                            | 1+  |
| Ferber<br>2004<br>Israel | RCT | Baby massage:<br>I= to receive 15 massages 3 times per day for 5 days.<br>Gp1: mothers conduct massage<br>Gp2: Researchers conduct massage                                                                       | Coding Interactive Behaviour Assessment for newborn                                                                          | Gp 1: 18<br>Gp 2: 18      | 19                        | Significant results report that at 3 months, mothers of massaged infants were less intrusive, and interactions were more reciprocal.<br><br>Gp1: Dyadic reciprocity (DR) – 2.42+0.87                                                                                                                                                                                                                                                                                                                                                                                                                                                             | 1+  |

1  
2  
3  
4  
5  
6  
7  
8  
9  
10  
11  
12  
13  
14  
15  
16  
17  
18  
19  
20  
21  
22  
23  
24  
25  
26  
27  
28  
29  
30  
31  
32  
33  
34  
35  
36  
37  
38  
39  
40  
41  
42  
43  
44  
45  
46  
47

|                 |     |                                                                              |                                                                                |    |    |                                                                                                                                                                                                                                                                                                                                                                                                                                                                                                                                                                                                                                                                                                                                                                                                                                                                                                                                   |     |
|-----------------|-----|------------------------------------------------------------------------------|--------------------------------------------------------------------------------|----|----|-----------------------------------------------------------------------------------------------------------------------------------------------------------------------------------------------------------------------------------------------------------------------------------------------------------------------------------------------------------------------------------------------------------------------------------------------------------------------------------------------------------------------------------------------------------------------------------------------------------------------------------------------------------------------------------------------------------------------------------------------------------------------------------------------------------------------------------------------------------------------------------------------------------------------------------|-----|
|                 |     | Gp 3 controls                                                                |                                                                                |    |    | <p>Maternal Intrusiveness(MI)-1.97+0.91<br/> Gp2: DR – 2.46+0.99<br/> MI – 1.68+0.63<br/> Gp3: DR – 1.66+0.68<br/> MI – 2.54+1.01<br/> DR: F=4.69,p&lt;0.01<br/> MI: F=4.05,p&lt;0.02</p> <p>No significant difference in maternal sensitivity was reported.</p>                                                                                                                                                                                                                                                                                                                                                                                                                                                                                                                                                                                                                                                                  |     |
| Als 2003 USA    | RCT | NIDCAP (Neonatal individualised Developmental Care and Assessment Programme) | PSI (Parental Stress Index)                                                    | 38 | 38 | <p>Mothers in the intervention group reported significantly more favourable scores than the control group.</p> <p>Hospital 1: I= 35.7 (sd 21.3)<br/> C=44.9 (sd34.2)<br/> Hospital 2: I=55.8 (sd28.8)<br/> C=65.2 (sd27.5)<br/> Hospital 3: I=49.0 (sd28.6)<br/> C=55.9 (sd22.5)<br/> Group score @ = .41, p&lt;.001<br/> Summary: MANOVA: F=2.41, df=5.66, p&lt;0.05</p>                                                                                                                                                                                                                                                                                                                                                                                                                                                                                                                                                         | 1++ |
| Gray, 2000, USA | RCT | Babylink individual website information (CareLink)                           | The Picker Institute’s Neonatal Intensive Care Unit Family Satisfaction survey |    |    | <p>61% (31/51 parents completed the questionnaire)</p> <p>BabyLink families reported significantly higher scores in all other dimensions except in coordination of care. Within the dimension of overall quality, BabyLink families were 85% less likely to report problems with the duration of their child’s hospitalization (6.7% vs 43.8%; p&lt;04). Of those reporting problems most noted that their NICU stay was shorter than they felt necessary.</p> <p>Interestingly, even though the same visitation policies applied to both groups, BabyLink families were also less likely to report problems when asked if the unit’s visitation policy met the needs of their other family members (13.3% vs 50%; p&lt;02).</p> <p>BabyLink families also showed a trend toward fewer problems related to receiving practical support from the NICU (33.3% vs 68.7%; p&lt;08).</p> <p>CareLink significantly improves family</p> | 1+  |



|                          |     |                                                                                        |                                                                                                                  |     |     |                                                                                                                                                                                                                                                                                                                                                                                                                                                                                                                                                                                                                                                                                                                                                                                                                                                                                                                                                                                                                                                                                      |    |
|--------------------------|-----|----------------------------------------------------------------------------------------|------------------------------------------------------------------------------------------------------------------|-----|-----|--------------------------------------------------------------------------------------------------------------------------------------------------------------------------------------------------------------------------------------------------------------------------------------------------------------------------------------------------------------------------------------------------------------------------------------------------------------------------------------------------------------------------------------------------------------------------------------------------------------------------------------------------------------------------------------------------------------------------------------------------------------------------------------------------------------------------------------------------------------------------------------------------------------------------------------------------------------------------------------------------------------------------------------------------------------------------------------|----|
|                          |     |                                                                                        |                                                                                                                  |     |     | satisfaction with inpatient VLBW care                                                                                                                                                                                                                                                                                                                                                                                                                                                                                                                                                                                                                                                                                                                                                                                                                                                                                                                                                                                                                                                |    |
| Hall 2002<br>Canada      | RCT | Weighing infant before and after feeds to assess maternal confidence in breast feeding | Parental sense of competence scale<br>Maternal confidence questionnaire<br>Influence of specific referents scale | 30  | 30  | No significant differences in maternal confidence or competence between weighed or not-weighed infants                                                                                                                                                                                                                                                                                                                                                                                                                                                                                                                                                                                                                                                                                                                                                                                                                                                                                                                                                                               | 1- |
| Huckaby 1999<br>USA      | RCT | Photograph of baby given to mother to take with them while baby on neonatal unit       | Bonding Observation Checklist (BOCL)<br>Physical Examination Observation Checklist (PEOCL)                       | 20  | 20  | Mothers with picture had significantly better scores on bonding measure than those without picture ( $p < 0.001$ for BOCL and $p < 0.01$ on PEOCL)                                                                                                                                                                                                                                                                                                                                                                                                                                                                                                                                                                                                                                                                                                                                                                                                                                                                                                                                   | 1+ |
| Tessier 1998<br>Columbia | RCT | Effects of Kangaroo care                                                               | Mothers perception of premature babies questionnaire                                                             | 246 | 246 | Kangaroo care significantly increased mother's sense of competence in mothering their baby ( $F(1481) 10.36, P .001$ ), and was significantly increased maternal sensitivity to their baby at the neonatal unit. ( $F(1481) 3.71, P .05$ ). This improved perception of their baby effect is related to a subjective "bonding effect" that may be understood readily by the empowering nature of the KMC intervention. The study also reported a negative effect on the feelings of received support from health professionals of mothers practicing KMC ( $F 5.03, P .03$ ).<br><br>Kangaroo care significantly reduced length of stay especially in lighter babies.<br>Two-way analysis of variance stratifying by birth weight showed that the savings in hospital stays were clearly related to weight at birth: an interaction effect ( $F(3480) 4.06, P .01$ ) shows that the maximum saving in the KMC group was observed in infants weighing 1501 g (4.5 to 6.7 days), whereas in infants weighing 1500g, the length of hospital stay was virtually identical in both groups | 1+ |
| Meyer 1994<br>USA        | RCT | Family based intervention (Psychological intervention for family, teaching care and    | Parental Stressor scale                                                                                          | 34  | 34  | Intervention group reported significantly less stress (PSS) and reported significantly less depression (BDS) at                                                                                                                                                                                                                                                                                                                                                                                                                                                                                                                                                                                                                                                                                                                                                                                                                                                                                                                                                                      | 1+ |

1  
2  
3  
4  
5  
6  
7  
8  
9  
10  
11  
12  
13  
14  
15  
16  
17  
18  
19  
20  
21  
22  
23  
24  
25  
26  
27  
28  
29  
30  
31  
32  
33  
34  
35  
36  
37  
38  
39  
40  
41  
42  
43  
44  
45  
46  
47

|                                     |     |                                                                                                                                                                                       |                                                                                                                                                           |                          |     |                                                                                                                                                                                                                                                                                                                                |    |
|-------------------------------------|-----|---------------------------------------------------------------------------------------------------------------------------------------------------------------------------------------|-----------------------------------------------------------------------------------------------------------------------------------------------------------|--------------------------|-----|--------------------------------------------------------------------------------------------------------------------------------------------------------------------------------------------------------------------------------------------------------------------------------------------------------------------------------|----|
|                                     |     | behavioural cues of baby, home discharge plan)                                                                                                                                        | (PSS)<br>Maternal self esteem<br>Inventory,<br>Beck<br>Depression<br>Scale (BDS),<br>Family<br>Environment<br>Scale                                       |                          |     | discharge.<br><br>BDI: Int: 11% vs. 44%, p<0.05; 39% vs 31% NS.<br>PSS: Int:2.4 ± 1.0; 2.0 ± 0.8 vs Con 2.4 ± 0.9; 2.6 ± 0.8<br>p<0.05<br><br>No other significant results were reported.                                                                                                                                      |    |
| Spiker<br>1993<br>USA               | RCT | Home Support<br>(Infant Health and Development Program<br>(IHDP) – Home visits from discharge up to 36<br>months                                                                      | Quality of<br>assistance in<br>parenting pre-<br>term baby<br>Supportive<br>presence for<br>parents of pre-<br>term infants                               | 271                      | 412 | Intervention group reported significantly better quality of<br>assistance ratings than control group (I: 3.6 [1.5], vs<br>3.3[1.5], p<0.05), but no significant difference on supportive<br>presence was reported. Most outcomes in this study were<br>baby outcomes.                                                          | 1- |
| Cobiella<br>1990<br>USA             | RCT | Two stress reduction programmes:<br>a) Video-tape training in active problem –<br>focussed coping strategies<br><br>b) Video-tape in emotion-focussed strategies to<br>manage anxiety | State-Trait<br>Anxiety<br>Inventory<br>(STAI),<br>Depression<br>Adjective<br>Checklist<br>(DACL)                                                          | Gp. A – 10<br>Gp. B - 10 | 10  | On post-treatment follow-up both the problem-focused and<br>emotion-focused treatment groups were significantly less<br>anxious than the controls and lower levels of depression<br>were observed for the emotion-focused group<br><br>STAI: PF-t(11)=2 71 p<0.01<br>EF-t2 56 p<0.02<br>DACL: PF – NS<br>EF-t(12)=2 36, p<0.03 | 1- |
| Parker-<br>Loewen<br>1987<br>Canada | RCT | 8 X 40 minute interaction coaching to encourage<br>sensitive responding by mothers                                                                                                    | Satisfaction<br>with Parenting<br>Scale<br>Knowledge of<br>Infant<br>Development<br>Scale<br>Life<br>experiences<br>survey<br>Interaction<br>rating scale | 35                       | 35  | No significant difference between treatment and control<br>group on interaction or knowledge of infant development or<br>satisfaction with parenting                                                                                                                                                                           | 1- |
| Barrera<br>1986<br>Canada           | RCT | Teaching developmental care                                                                                                                                                           | HOME<br>Parent-infant<br>interactions                                                                                                                     | 40                       | 40  | At 4 mths and 16 mths, mothers in the Parent-Infant<br>intervention group and full term control group were<br>significantly better maternal responsiveness and mother-<br>infant interaction compared to the pre-term baby control                                                                                             | 1- |

1  
2  
3  
4  
5  
6  
7  
8  
9  
10  
11  
12  
13  
14  
15  
16  
17  
18  
19  
20  
21  
22  
23  
24  
25  
26  
27  
28  
29  
30  
31  
32  
33  
34  
35  
36  
37  
38  
39  
40  
41  
42  
43  
44  
45  
46  
47

|                         |     |                                                                          |                                                                                                    |    |    |                                                                                                                                                                                                                                                                                                                                                                                                                                                              |    |
|-------------------------|-----|--------------------------------------------------------------------------|----------------------------------------------------------------------------------------------------|----|----|--------------------------------------------------------------------------------------------------------------------------------------------------------------------------------------------------------------------------------------------------------------------------------------------------------------------------------------------------------------------------------------------------------------------------------------------------------------|----|
|                         |     |                                                                          |                                                                                                    |    |    | group.<br><br>Manova:<br>Maternal responsiveness<br>I=7.32, FTC – 7.44, C- 6.41, f=6.78, p<0.001<br>Maternal involvement:<br>I=7.23, FTC-7.16, C-6.26, f=2.70, p<0.05                                                                                                                                                                                                                                                                                        |    |
| Nurcombe<br>1984<br>USA | RCT | Behavioural Assessment Scale: Mother-Infant Transaction Programme (MITP) | Hereford Parent Attitude Survey<br>Seashore Self Confidence Rating Paired Comparison Questionnaire | 37 | 36 | Intervention group scored better on maternal adaptation (role satisfaction, attitudes to child-rearing, self confidence) than low birth weight controls (F(3, 87), p<0.030).<br>Univariate analysis:<br>Maternal satisfaction F (2,89), 4.55, p<0.013<br>Maternal attitude (2,89), 4.05, p<0.021<br>Maternal self confidence F (1,89), 7.44, p<0.008<br><br>Full term controls scored better than combined low birth weight group (F [3,87], 3.27, p=0.025). | 1+ |

**2b. Quasi- experimental and cohort studies.**

| Author (Year) Country | Study design | Intervention                                                                                                                       | Outcome measure                                                                                                       | No of cases | No. of controls | Statistically significant results                                                                                                                                                                                                                                                                                                                                                                                                                                                                                                                           | Quality (SIGN) |
|-----------------------|--------------|------------------------------------------------------------------------------------------------------------------------------------|-----------------------------------------------------------------------------------------------------------------------|-------------|-----------------|-------------------------------------------------------------------------------------------------------------------------------------------------------------------------------------------------------------------------------------------------------------------------------------------------------------------------------------------------------------------------------------------------------------------------------------------------------------------------------------------------------------------------------------------------------------|----------------|
| Byers 2006 USA        | Cohort       | Family-centred care/developmental supportive care                                                                                  | Questionnaire developed for study to measure parents perceptions and satisfaction. Study mainly reports baby outcomes | 57          | 57              | No differences in parent perception or satisfaction with the neonatal unit                                                                                                                                                                                                                                                                                                                                                                                                                                                                                  | 2-             |
| Jotzo 2005 Germany    | Cohort       | Psychological intervention to reduce stress at neonatal unit (One off psychological intervention to help parents cope with stress) | Questionnaire: Impact of events scale (IES)<br>Trauma experiences measure                                             | 25          | 25              | Mothers in intervention group had significantly lower traumatic impact from preterm birth (lower overall symptoms: traumatic impact I 25.2 (SD 13.9), C 37.5 (SD 19.2), mean difference 12.28 (2.74-21.82, p=0.013; lower avoidance I 7.7 (SD 5.3), C 12.4 (SD 8.4), mean difference 4.65 (0.67-8.69), p=0.023 and hyperarousal, I 5.9 (SD 4.7), C9.5 (SD 5.7), mean difference – 3.56 (0.61 – 6.51), p=0.019; lower intrusion symptoms but not significant). Control group: 76% of mothers showed clinically significant psychological trauma at discharge | 2+             |

|                           |        |                                         |                                                                                                                                     |    |    |                                                                                                                                                                                                                                                                                                                                                                                                                                                                                                                                                                                                                                                                                                                                                               |     |
|---------------------------|--------|-----------------------------------------|-------------------------------------------------------------------------------------------------------------------------------------|----|----|---------------------------------------------------------------------------------------------------------------------------------------------------------------------------------------------------------------------------------------------------------------------------------------------------------------------------------------------------------------------------------------------------------------------------------------------------------------------------------------------------------------------------------------------------------------------------------------------------------------------------------------------------------------------------------------------------------------------------------------------------------------|-----|
|                           |        |                                         |                                                                                                                                     |    |    | vs. 36% (p<0.01) in intervention group.                                                                                                                                                                                                                                                                                                                                                                                                                                                                                                                                                                                                                                                                                                                       |     |
| Penticuff<br>2005<br>USA  | Cohort | Discussion around Infant progress chart | Comprehension of infant medical condition and satisfaction with collaboration with health professionals while baby at neonatal unit | 77 | 77 | Intervention group had fewer unrealistic concerns (ANOVA): (4.32 (0.86) vs 8.56 (0.57), p<0.018; less uncertainty about the infant medical condition 1.92 (0.30) vs 3.52 (0.54), p< 0.003; had less decision conflict 45.88 (2.33) vs 59.10 (2.32), p<0.001; more satisfaction with medical decisions process 120.20 (4.07), 104.95 (4.33), p<0.012; more satisfaction with decision input 33.44 (1.30) vs 30.05 (1.21), p<0.058.<br><br>No significant difference was reported in satisfaction of care for the infant by HC staff, and in satisfaction with decision made.                                                                                                                                                                                   | 2++ |
| Byers<br>2003<br>USA      | Cohort | Co-bedding multiples in same incubator  | NIDCAP infant behaviour State-Trait Anxiety Inventory Maternal Attachment Inventory Parental satisfaction tool                      | 16 | 21 | No significant results reported                                                                                                                                                                                                                                                                                                                                                                                                                                                                                                                                                                                                                                                                                                                               | 2-  |
| Preyde<br>2003<br>Canada  | Cohort | Parent to Parent Peer Support           | Parental Stressor scale (x) State-Trait Anxiety Scale (Spielberger)                                                                 | 32 | 28 | Intervention group better scores on all measures at 4 or 16 weeks (groups were equivalent at baseline), e.g. mean PSS score 1.54 (1.3-1.7) in intervention group at 4 weeks vs. 2.93 (2.7-3.1) in controls, p<0.001<br><br>At 4 weeks mean PSS score was significantly less in the intervention group – 1.54 (1.3-1.7) vs 2.93 (2.7-3.1), p<0.001.<br>At 16 weeks mean anxiety score, mean depression score, and perceived support were significantly less in the intervention group: anxiety - 31.4 (27.2-35.4) vs 38.6 (34.6-42.7), p<0.05; depression - 2.20 (0.89-3.60) vs 4.88 (3.51-6.17), p<0.01; perceived support – 6.49 (6.02-6.82) vs 5.48 (5.09-5.94), p<0.01.<br>There were no different in trait anxiety between the groups at any time period. | 2++ |
| Feldman<br>2002<br>Israel | Cohort | Effects of Kangaroo care                | Mother-Infant interaction scale Maternal depression Mothers perceptions HOME                                                        | 73 | 73 | At 37 weeks gestational age: After kangaroo care, interactions more positive, mothers showed more positive affect, touch, adaptation to infant cues, infants more alertness and less gaze aversion, mothers less depressed & viewed infants as less abnormal. Less maternal depression [KC mean 6.68 (5.55) vs control 9.05 (4.27), F=5.68, p<0.05].<br><br>At 3 months corrected age: mothers and fathers of kangaroo care infants more sensitive and provided better home environment.<br><br>KC Mothers provided a better home environment Manova at 3 months – HOME: Wilks F (df=7,123), 2.99, p<0.01. KC fathers provided a better home                                                                                                                  | 2+  |

|                         |                    |                                                                                                                                                                                                                                                                                                                                                                                                                   |                                                                                                                       |                                     |              |                                                                                                                                                                                                                                                                                                                                                                                                                                                                                                                                                                                                                                                                                                                                                                                                                                                                                                                                         |    |
|-------------------------|--------------------|-------------------------------------------------------------------------------------------------------------------------------------------------------------------------------------------------------------------------------------------------------------------------------------------------------------------------------------------------------------------------------------------------------------------|-----------------------------------------------------------------------------------------------------------------------|-------------------------------------|--------------|-----------------------------------------------------------------------------------------------------------------------------------------------------------------------------------------------------------------------------------------------------------------------------------------------------------------------------------------------------------------------------------------------------------------------------------------------------------------------------------------------------------------------------------------------------------------------------------------------------------------------------------------------------------------------------------------------------------------------------------------------------------------------------------------------------------------------------------------------------------------------------------------------------------------------------------------|----|
|                         |                    |                                                                                                                                                                                                                                                                                                                                                                                                                   |                                                                                                                       |                                     |              | environment – HOME: Wilks F (df=7,110), 2.45, p<0.05.<br><br>At 6 months corrected age: kangaroo care mothers more sensitive (maternal sensitivity: KC mean 4.20 (0.64) vs control mean 3.86 (0.76, univariate 5.36, p<0.05) & infants scored higher on Bayley Mental Development Index (96.39 vs. 91.81, p<0.01) and Psychomotor Development Index (85.47 vs. 80.53, p<0.05)                                                                                                                                                                                                                                                                                                                                                                                                                                                                                                                                                           |    |
| Kurz 2002 Austria       | Cohort             | Home support (Phone call and counselling of parents after returning home) for parents of babies with monitors                                                                                                                                                                                                                                                                                                     | Questionnaire about monitor use, stress reported by monitor use, and satisfaction                                     | 90                                  | 70           | Home monitoring considered reassuring for 60% of families. After intensive counselling introduced, parents liked the instruction better (74% vs. 44% very satisfied; 24% vs. 51% satisfied; 2% vs. 5% not satisfied, p<0.005), were less stressed by the monitor (42% vs. 63% stressed by false alarms, p<0.05) and reacted less aggressively to monitor alarms (8% vs. 24% reacted by vigorously shaking or lifting baby, p<0.05); used monitor mainly during sleeping periods; used monitor for less time (6.1 months vs. 7.6 months, p<0.05). Counselling did not reduce anxiety.                                                                                                                                                                                                                                                                                                                                                    | 2+ |
| Ortenstrand 2001 Sweden | Cohort             | Early discharge with domiciliary nursing care<br>Domiciliary nurse made an individual care and discharge plan together with the parents. During these planning sessions, parent's knowledge of how to care for their pre-term infant were checked and supplemented. The nurse was available for home visit/ telephone consultation from Monday to Friday, and at weekends parents could contact the neonatal ward | STAI                                                                                                                  | 40                                  | 35           | No differences in mothers' Trait anxiety at 1 <sup>st</sup> or 2 <sup>nd</sup> assessment. State (situational) anxiety lower for EDG mothers at 1 <sup>st</sup> assessment (EDG 30.9 [SD 6.2] vs. CG 36.6 [8.4], p<0.01.<br><br>Fathers showed a significant difference in trait anxiety at both 1 <sup>st</sup> and 2 <sup>nd</sup> study time period (30.1 (5.8) vs 33.5 (7.7), p<0.05, but only a significant difference in state anxiety at the 1 <sup>st</sup> assessment (29.5 [5.4] vs 32.8 [9.1], p<0.08.<br><br>At 1 yr, no difference in recollection of anxiety in caring for the infant or in experiences of mental imbalance related to the birth of the infant                                                                                                                                                                                                                                                            | 2+ |
| Finello 1998 USA        | Cohort             | Home Support<br>Gp1: Home healthcare and home visiting<br>Gp2: Home healthcare only<br>Gp3: Home visiting only                                                                                                                                                                                                                                                                                                    | 1 week after discharge:<br>HOME<br>CES-D<br>FACES II<br>6 mths after:<br>HOME<br>12 months:<br>CES-D, FACESII<br>HOME | 81 in total                         | Not reported | Interventions improved the home environment (at 1 month, mean HOME 27.2, SD 6.0 for group 1 vs. 24.2, 2.7 for group 2 vs. 30.0, 6.2 for group 3 vs. 22.7, 3.3 for group 4, p<0.001; at 6 months, 33.7, 5.9 vs. 30.2, 4.3 vs. 34.4, 4.3 vs. 28.9, 5.0, p=0.003; at 12 months, 35.2, 5.2 vs. 31.2, 3.8 vs. 35.6, 5.3 vs. 30.5, 5.0, p=0.005). No difference between groups on FACES II at 1 or 12 months, or on maternal parenting satisfaction. The latter was more strongly associated with reports of support from husband (p<0.001), friend support (p<0.001) and family support (p<0.001). Mean depression score at 1 month 18.5 (SD 11.59, range 0-48 on a total scale range of 0-60; 16 considered cut-off for clinical depression (no differences between groups). Mean CES-D at 12 months 19.76, SD 10.21, range 2-42, still indicating clinically significant levels of depression. No other significant results were reported. | 2+ |
| Brown 1994 USA          | Quasi experimental | Booklet, videotape and practical session. for parents of broncho-pulmonary dysplasia discharged from tertiary care centre.                                                                                                                                                                                                                                                                                        | Pre-test Post-test study<br>Pre-test of                                                                               | 18 primary caregivers of 10 infants |              | Post-test scores (immediate mean = 17.33 [SD 3.91]; delayed 17.17 [4.41]) significantly higher than pretest scores (14.38 [3.72], p<0.01)                                                                                                                                                                                                                                                                                                                                                                                                                                                                                                                                                                                                                                                                                                                                                                                               | 2+ |

|                        |        |                                                                                                                                                                                                                                                                                                                                                                                 |                                                                                                                                  |         |                      |                                                                                                                                                                                                                                                                                                                                                                 |    |
|------------------------|--------|---------------------------------------------------------------------------------------------------------------------------------------------------------------------------------------------------------------------------------------------------------------------------------------------------------------------------------------------------------------------------------|----------------------------------------------------------------------------------------------------------------------------------|---------|----------------------|-----------------------------------------------------------------------------------------------------------------------------------------------------------------------------------------------------------------------------------------------------------------------------------------------------------------------------------------------------------------|----|
|                        |        | Education on physical characteristics of infants on continuous low-flow oxygen & their care. Psychosocial development of infant, parental needs, oxygen equipment, CPR in NICU                                                                                                                                                                                                  | knowledge immediately before and post-test immediately after programme; post-test repeated 6 weeks after discharge               |         |                      |                                                                                                                                                                                                                                                                                                                                                                 |    |
| Lindsay<br>1993<br>USA | Cohort | Parent to Parent Peer support for parents with critically ill pre-term babies.                                                                                                                                                                                                                                                                                                  | Parent report                                                                                                                    | NR      | NR                   | Numerical data not reported in paper<br>Reported benefit to parents: emotional support + Information support                                                                                                                                                                                                                                                    | 2- |
| Rauh<br>1990<br>USA    | Cohort | Vermont Mother-Infant Transaction Programme (teach parents to appreciate infants unique characteristics. teach behavioural cues, teach parents to respond to infant, enhance mothers enjoyment of baby).                                                                                                                                                                        | Maternal Role Satisfaction questionnaire<br>Self-Confidence rating<br>Parent Attitude scale                                      | 40      | 41                   | At 6 months: significantly better intervention effects for maternal role satisfaction, self-confidence and perception of infant temperament in intervention group; no difference on maternal attitudes to child-rearing. Data not given in paper.                                                                                                               | 2- |
| Leonard<br>1989<br>USA | Cohort | Educational support programme for infants on home monitors (Infant Apnea Evaluation Programmes (IAEP)L<br>Gp1 – with home monitoring<br>Gp2- no home monitoring<br>Gp3 – healthy term babies                                                                                                                                                                                    | Symptom checklist-90, schedule of recent events, satisfaction - all in interview 2 wks after going home                          | Gp1 -40 | Gp 2- 30<br>Gp3 - 32 | Psychological symptoms highest in parents of non-monitored premature infants (M - 0.2845 [0 – 0.82] vs , NM – 0.4507 [0-1.3], p=0.037 ); particularly fathers of non-monitored infants scoring high on depression (0.6846)).<br><br>Support highest in monitored infants (p=0.005)<br>NS on family satisfaction                                                 | 2+ |
| Resnick<br>1988 USA    | Cohort | Educational developmental Intervention Programme at home – teach parents to use: parent's voice tape, massage, passive range of motion, exercises) and twice-monthly interventions at home by child development specialists through 12 months adjusted age (e.g. language and social skills enrichment exercises, cognitive development, motor exercises, parenting activities) | Greenspan-Lieberman Observations System (GLOS) to analyse infant-caregiver interactions at 6 and 12 months                       | 21      | 20                   | Parent child positive verbal scores significantly higher in treatment than control groups (2.91 vs. 2.08), p=0.02. Intervention group dyads had fewer negative verbal interactions (0.07 vs. 0.17, p=0.03).<br><br>The developmental intervention benefited the quality of the parent-infant interaction at home, as well as benefiting the infant development. | 2- |
| Ross<br>1984<br>USA    | Cohort | Teaching developmental care at home to lower socio-economic parents                                                                                                                                                                                                                                                                                                             | HOME<br>Maternal Attitudes Scale<br>Maternal developmental Expectations and child rearing attitudes survey<br>Baby outcomes (not | 44      | 40                   | Intervention group reported significantly higher HOME scores (total score 38.4 vs. 34.9, p<0.001). No other significant differences reported                                                                                                                                                                                                                    | 2+ |

|                        |        |            |                                                       |    |    |                                                                                                                                                                                                                                                                                                                                                                                                                                                                                           |     |
|------------------------|--------|------------|-------------------------------------------------------|----|----|-------------------------------------------------------------------------------------------------------------------------------------------------------------------------------------------------------------------------------------------------------------------------------------------------------------------------------------------------------------------------------------------------------------------------------------------------------------------------------------------|-----|
|                        |        |            | reported here)                                        |    |    |                                                                                                                                                                                                                                                                                                                                                                                                                                                                                           |     |
| Piecuch<br>1983<br>USA | Cohort | videophone | No. of calls made to neonatal unit while baby at unit | 17 | 17 | Mean number of telephone calls to NICU used as proxy for interest in newborns. Mothers with access to videophone made more calls: (1.0 vs. 0.2, $p < 0.05$ ) when mothers hospitalised; (0.9 vs. 0.3, $p < 0.05$ ) when mother discharged. Mothers appreciated videophone; relieved at being able to see infants; infant's condition not as bad as they had imagined; many talked to infant even though only viewing an image; wanted to see close-ups of hands and feet as well as face. | 2 - |

### 2c. Non-controlled studies (e.g. case series, cross-sectional, qualitative)

| Author (Year) Country        | Study design | Objective                                                                                                                                               | Setting                                                                              | Study design/ outcome measures | Intervention | Results                                                                                                                                                                                                                                                                                                                                                                                                                                                                                                                                                                                     | Authors Conclusions                                                                                                                                                                                                                                                                                                         | Sign |
|------------------------------|--------------|---------------------------------------------------------------------------------------------------------------------------------------------------------|--------------------------------------------------------------------------------------|--------------------------------|--------------|---------------------------------------------------------------------------------------------------------------------------------------------------------------------------------------------------------------------------------------------------------------------------------------------------------------------------------------------------------------------------------------------------------------------------------------------------------------------------------------------------------------------------------------------------------------------------------------------|-----------------------------------------------------------------------------------------------------------------------------------------------------------------------------------------------------------------------------------------------------------------------------------------------------------------------------|------|
| Jones et al, 2007, Australia | Qualitative  | To report mothers' and fathers' perceptions of effective and ineffective communication by nurses in the neonatal intensive care unit (NICU) environment | NICU<br>20 mothers and 13 fathers                                                    | Semi-structured interviews     | None         | The most frequently mentioned strategies for effective communication were discourse management and emotional expression, highlighting the importance for parents of communication that is both nurturing and shares the exchange of information as equal partners.<br><br>Parents valued communication that was two-way and involved informal chatting as well as more formal discussions. Parents wanted provision of information in a reassuring and respectful way. The study highlights that not only do parents simply want lots of information they also want consistent information. | Strategies mentioned for effective communication were about shared management of the interaction and appropriate support and reassurance by nurses.<br><br>Mothers emphasised more being encouraged as equal partners in the care of their infant.                                                                          | 3    |
| Buarque, 2006                | Qualitative  | To investigate the influence of support groups on the family of risk newborn infants and                                                                | Neonatal unit<br>13 mothers, six fathers, two grandmothers and 16 healthcare workers | Semi-structured interviews     | None         | The analysis revealed that the support group to the family of risk newborns provided parents and family members with information, emotional support and strengthening so that they could come to terms with the birth of their child and his/her admission to the neonatal unit, in addition to enabling parents to take care                                                                                                                                                                                                                                                               | The support group to the family of risk newborns uses an approach that is based on family-centered care. These principles allow restoring parental competence, helping healthcare workers to respect values and feelings of family members, and establishing a collaborative work between parents and healthcare workers in | 3    |

1  
2  
3  
4  
5  
6  
7  
8  
9  
10  
11  
12  
13  
14  
15  
16  
17  
18  
19  
20  
21  
22  
23  
24  
25  
26  
27  
28  
29  
30  
31  
32  
33  
34  
35  
36  
37  
38  
39  
40  
41  
42  
43  
44  
45  
46  
47

|                            |                 |                                                                                                                                       |                                                                   |                                                                                                                                                                                             |                                                                                                                                        |                                                                                                                                                                                                                                                                                                                                                                                                                                                                   |                                                                                                                                                                                                                                                                         |   |
|----------------------------|-----------------|---------------------------------------------------------------------------------------------------------------------------------------|-------------------------------------------------------------------|---------------------------------------------------------------------------------------------------------------------------------------------------------------------------------------------|----------------------------------------------------------------------------------------------------------------------------------------|-------------------------------------------------------------------------------------------------------------------------------------------------------------------------------------------------------------------------------------------------------------------------------------------------------------------------------------------------------------------------------------------------------------------------------------------------------------------|-------------------------------------------------------------------------------------------------------------------------------------------------------------------------------------------------------------------------------------------------------------------------|---|
|                            |                 | on neonatal unit workers.                                                                                                             |                                                                   |                                                                                                                                                                                             |                                                                                                                                        | of the newborn infant. There was interpersonal growth in the interaction between parents, family members, and healthcare workers.                                                                                                                                                                                                                                                                                                                                 | the neonatal unit.                                                                                                                                                                                                                                                      |   |
| Hurst et al, 2006          | Qualitative     | To identify parents' utilization and evaluation of a support program based in a newborn intensive care unit (NICU)                    | NICU<br>477 parents utilised support service, 48 completed survey | Program records and a survey developed by the author documented parental use and evaluation of services. Data analysis consisted of descriptive statistics and qualitative content analysis | Support programme that offered a combination of formats for support services: group support, one-to-one support, and telephone support | 78% utilized 1 support service format exclusively. Eighteen percent utilized 2 support formats concurrently. A subsample of 48 parents completed an evaluation survey. Group support offered more opportunities for families to problem-solve communication issues with nursery personnel and provide information that assisted parents' involvement in their babies' care. Utilising more than one support format provided greater support for parents.          | Parent support programs that utilize only one type of format may not be optimal for providing the range of support needed by many NICU families. Parent support programs offer an important mechanism to assess provider approaches to facilitate family-centered care. | 3 |
| Kowalski 2006,             | Cross-sectional | To determine what information is wanted, who provides information and what expectations parents have regarding obtaining information. | Neonatal unit                                                     | A 19-item questionnaire was given to the parents of infants 32 weeks or younger prior to discharge from the NICU.                                                                           | None                                                                                                                                   | Out of the 101 parents who consented, almost all of the parents (96%) felt that 'the medical team gave them the information they needed about their baby' and that the 'neonatologist did a good job of communicating' with them (91%). However, the nurse was chosen as 'the person who spent the most time explaining the baby's condition', 'the best source of information,' and the person who told them 'about important changes in their baby's condition' | Although the neonatologist's role in parent education is satisfactory, the parents identified the nurses as the primary source of information.                                                                                                                          | 3 |
| Wielenga 2006, Netherlands | Qualitative     | Evaluation of NIDCAP                                                                                                                  | NICU                                                              | NICU-Parent Satisfaction Form and the Nurse Parent Support Tool                                                                                                                             | NIDCAP                                                                                                                                 | Parents were significantly more satisfied with care given according to NIDCAP principles than they were with the traditional care for their premature born babies.                                                                                                                                                                                                                                                                                                |                                                                                                                                                                                                                                                                         | 3 |
| Bennett 2005 UK            | Qualitative     | Evaluation of Rooming in (care by parent)                                                                                             | NICU                                                              | Interview                                                                                                                                                                                   | Rooming in (care by parent)                                                                                                            | Most found it an extremely positive experience (scared but realised the opportunity to know each other more, feel a bit more in charge; promoting breastfeeding, increased bonding & confidence to take baby home).                                                                                                                                                                                                                                               | Most mothers reported 'rooming in' to be a useful, informative time                                                                                                                                                                                                     | 3 |



|                                                                                                                                     |                                |                 |                                                                                                 |                                                        |                                                                      |                                                                                                                                                                                                                                                                                                                              |                                                                                                                                                                                                                                                                                                                                                                                                                                                                                                                                                                                                                                                                                                                                                                                                                                                                                                                                                         |                                                                                                                                            |   |
|-------------------------------------------------------------------------------------------------------------------------------------|--------------------------------|-----------------|-------------------------------------------------------------------------------------------------|--------------------------------------------------------|----------------------------------------------------------------------|------------------------------------------------------------------------------------------------------------------------------------------------------------------------------------------------------------------------------------------------------------------------------------------------------------------------------|---------------------------------------------------------------------------------------------------------------------------------------------------------------------------------------------------------------------------------------------------------------------------------------------------------------------------------------------------------------------------------------------------------------------------------------------------------------------------------------------------------------------------------------------------------------------------------------------------------------------------------------------------------------------------------------------------------------------------------------------------------------------------------------------------------------------------------------------------------------------------------------------------------------------------------------------------------|--------------------------------------------------------------------------------------------------------------------------------------------|---|
| 1<br>2<br>3<br>4<br>5<br>6<br>7<br>8<br>9<br>10<br>11<br>12<br>13<br>14<br>15<br>16<br>17<br>18<br>19<br>20<br>21<br>22<br>23<br>24 | Broedsgaard<br>2005<br>Denmark |                 | To present the parents' experiences of an educational programme                                 | NICU<br>37 families with premature infants (<34 weeks) | Descriptive study<br><br>Semi-structured interviews and focus groups | Educational programme (topic group discussions) for parents during hospitalisation; health visitor coordinator on NICU; visit and orientation about NICU for family's health visitor; multidisciplinary discharge conference; booklets for parents and health care providers; parents' evenings once a month after discharge | Families valued support and guidance from coordinator; having named contact nurse throughout child's stay; continuity of care; felt secure when they went home; NICU personnel and own health visitor collaborated well. They received extra visits from health visitor (most 4-6 extra but some >7 extra) in the first year and this was in accordance with their needs. Frustrated that mothers were on postnatal ward with mothers of full-term infants but they were separated from their infants (NICU on another floor). Felt that their needs not met in maternity unit. Felt assisted and reassured in NICU; the parents needed special care to tackle their situation and needed lots of information (repeated several times, plus written materials to reinforce). Discharge was time of anxiety; shock; needed to adjust; return home helped by meeting health visitor on NICU; 3-4 days rooming-in on NICU helped preparing to return home. | Intervention increased support, contributed to confidence in caring for infant and infant well-being after discharge.                      | 3 |
| 25<br>26<br>27<br>28<br>29<br>30<br>31                                                                                              | Freer, 2005,<br>Scotland       | Case study      | To report on Babylink (an individual website approach to sharing information with parents)      | NICU                                                   | Descriptive reports from parents                                     | Babylink individual website information                                                                                                                                                                                                                                                                                      | Parents reported the benefits of having access to information on their baby on a daily basis. BabyLink has been beneficial to families in communicating complex information and humanising the experience of neonatal intensive care.                                                                                                                                                                                                                                                                                                                                                                                                                                                                                                                                                                                                                                                                                                                   | An efficient means of keeping parents informed about the care and progress of their babies being cared for in the hospital's neonatal unit | 3 |
| 32<br>33<br>34<br>35<br>36<br>37<br>38                                                                                              | Hawthorne<br>2005<br>UK        | Cross-sectional | To evaluate Neonatal Behavioural Assessment Scale (NBAS) to support parent-infant relationship. | Neonatal unit<br>22 parents of premature infants       | 22 Questionnaire developed for study                                 | Behavioural assessment scale                                                                                                                                                                                                                                                                                                 | Parents reported: NBAS helped parents adjust to baby's behaviours, increased parents confidence in caring for their baby, satisfied their information needs about their baby.                                                                                                                                                                                                                                                                                                                                                                                                                                                                                                                                                                                                                                                                                                                                                                           | NBAS can improve parents knowledge and improve their confidence in caring for their infant.                                                | 3 |
| 39<br>40<br>41<br>42<br>43<br>44<br>45<br>46<br>47                                                                                  | Remedios                       | Qualitative     | To evaluate                                                                                     | Neonatal unit                                          | Semi-structured interviews                                           | Baby message                                                                                                                                                                                                                                                                                                                 | Parents reported feeling 'closer' to their                                                                                                                                                                                                                                                                                                                                                                                                                                                                                                                                                                                                                                                                                                                                                                                                                                                                                                              | For the parents of a premature baby, baby                                                                                                  | 3 |

|                               |             |                                                                |                                                                                                                                                                 |                                                                                                                                                               |                                                                                                     |                                                                                                                                                                                                                                                                                                                                                                                                                                                                                                                                                                                                                                                                                                                                                                                                                                                                                                                                                                                                                |                                                                                                                                                                                                           |   |
|-------------------------------|-------------|----------------------------------------------------------------|-----------------------------------------------------------------------------------------------------------------------------------------------------------------|---------------------------------------------------------------------------------------------------------------------------------------------------------------|-----------------------------------------------------------------------------------------------------|----------------------------------------------------------------------------------------------------------------------------------------------------------------------------------------------------------------------------------------------------------------------------------------------------------------------------------------------------------------------------------------------------------------------------------------------------------------------------------------------------------------------------------------------------------------------------------------------------------------------------------------------------------------------------------------------------------------------------------------------------------------------------------------------------------------------------------------------------------------------------------------------------------------------------------------------------------------------------------------------------------------|-----------------------------------------------------------------------------------------------------------------------------------------------------------------------------------------------------------|---|
| 2005, USA                     |             | the effect of baby massage on the parents of premature infants |                                                                                                                                                                 |                                                                                                                                                               |                                                                                                     | infants, and reported improved confidence in caring for their infant. Parents felt the baby massage was beneficial to the infant and themselves.                                                                                                                                                                                                                                                                                                                                                                                                                                                                                                                                                                                                                                                                                                                                                                                                                                                               | massage can help improve the sense of closeness to their infant and improve their confidence in caring for their infant.                                                                                  |   |
| Prentice<br>2004<br>Australia | Qualitative | To evaluate a developmental care                               | NICU – parents interviewed at home<br>9 parents in developmental care group compared with 8 historical controls before introduction of this programme into NICU | Retro-spective: Interviews: recall of mother's health and family functioning, particularly after discharge from NICU, review of family photos and memorabilia | Developmental care: forming partnerships with parents, Care by Parent programme                     | Developmental care group parents felt encouraged to be partners in infant's care (nervous of being hands-on but staff insisted which helped; fathers especially more than before); pre-DC parents were more onlookers than partners; inconsistency in amount of involvement they were allowed (depended on staff on duty); DC parents described comfort in reading infant cues and more confidence in responding; encouraged to dress baby (normalising experience). Sense of control & freedom when using Care by Parent area; felt more as though it was their baby. Pre-DC parents took time to develop confidence once at home; DC parents confident straight away. Partners also more confident, more congruent, both knew baby's personality, felt they knew baby really well. Both group maintained vigilance; DC group less anxious, more problem-solving, more self-reliant, whereas pre-DC parents found it difficult when there was no-one to tell them what to do. DC practices continued at home. | Developmental care seemed to help mitigate stress and provide new ways of coping to parents; encouraging an involving the parents in care & decision-making led to greater self-reliance after discharge. | 3 |
| Jonsson<br>2003<br>Sweden     | Qualitative | To report on an early discharge & home care programme          | NICU<br>23 parents (17 women + 6 men) of babies on home care programme                                                                                          | Interviews                                                                                                                                                    | Home care programme – home visits at parent request (1 day-1 week apart); counselling & supervision | Becoming a family: do not feel like a family in NICU; shared infant with staff; feeling gradually disappeared when they went home.<br>Being at home: nervous; less conflict between being with infant in hospital and being with other children at home<br>Being reunited as a family; not having to share baby with others<br>Feeling security: important for parents to have access to information and advice:                                                                                                                                                                                                                                                                                                                                                                                                                                                                                                                                                                                               | Parents wanted to come home earlier to feel like a family, but wanted security of access to staff knowledge & support                                                                                     | 3 |

1  
2  
3  
4  
5  
6  
7  
8  
9  
10  
11  
12  
13  
14  
15  
16  
17  
18  
19  
20  
21  
22  
23  
24  
25  
26  
27  
28  
29  
30  
31  
32  
33  
34  
35  
36  
37  
38  
39  
40  
41  
42  
43  
44  
45  
46  
47

|                                |             |                                                                                                                                                                           |                                                                                                                                                  |                                       |                                                                                                                                                                                            |                                                                                                                                                                                                                                                                                                                                                                                                                                                                                                                                                                                                                                                                                                                                                           |                                                                                                                                                                                                                                                                                                                                                                                                                                                                      |   |
|--------------------------------|-------------|---------------------------------------------------------------------------------------------------------------------------------------------------------------------------|--------------------------------------------------------------------------------------------------------------------------------------------------|---------------------------------------|--------------------------------------------------------------------------------------------------------------------------------------------------------------------------------------------|-----------------------------------------------------------------------------------------------------------------------------------------------------------------------------------------------------------------------------------------------------------------------------------------------------------------------------------------------------------------------------------------------------------------------------------------------------------------------------------------------------------------------------------------------------------------------------------------------------------------------------------------------------------------------------------------------------------------------------------------------------------|----------------------------------------------------------------------------------------------------------------------------------------------------------------------------------------------------------------------------------------------------------------------------------------------------------------------------------------------------------------------------------------------------------------------------------------------------------------------|---|
|                                |             |                                                                                                                                                                           |                                                                                                                                                  |                                       |                                                                                                                                                                                            | checked with checklist with the neonatal nurses; had questions when they got home<br>Needed accessibility, usually by telephone, with home care team<br>Needed support from health care professionals and relatives                                                                                                                                                                                                                                                                                                                                                                                                                                                                                                                                       |                                                                                                                                                                                                                                                                                                                                                                                                                                                                      |   |
| Lawhorn<br>2002 USA            | Case series | To report on a facilitating parent assessment of infant behaviour and supportive responses                                                                                | NICU Convenience sample of 10 infants ( $\leq 1500g$ , $\leq 32$ weeks, appropriate for gestational age, no congenital abnormality) + 18 parents | Videotaped parent-infant interactions | An individualised nursing intervention based on assumptions of parent and infant competence; discussion of videotaped interactions to discuss infant cues and promote supportive responses | The intervention enhanced the parents' ability to appraise the infant's behaviour and respond in a supportive manner (data not presented). Parents found it helpful in getting to know their infant and being more empowered in the infant's care.                                                                                                                                                                                                                                                                                                                                                                                                                                                                                                        | NICU staff should support parents in gaining greater understanding of infant and sensitive interactions; parents need to be active collaborators in infant care                                                                                                                                                                                                                                                                                                      | 3 |
| Fenwick,<br>2001,<br>Australia | Qualitative | To Gain a greater understanding of the woman's experience of mothering in the nursery and how nurses' social interaction and verbal exchanges impacted on this experience | Special care nursery<br>28 women<br>The average age of the women was 28 years (range 19-41)<br>15 gave birth at 30 weeks or less.                | Semi-structured interviews            | None                                                                                                                                                                                       | Nurses engaging in such 'chatting' resulted in the development of relationships that were reciprocal and interdependent rather than undesirable or difficult to achieve. Mothers described this as personal, and forming friendships.<br><br>While women commented that all the facilitative behaviours were important, nurses who 'chatted' in this way were singled out particularly as those that truly made a difference to their nursery experience.<br><br>It was these nurses that all the women in the study identified as the people who 'most' facilitated their efforts to learn and take up their role as mothers, feel in control of the situation and, ultimately, assisted them in developing a connected relationship with their infants. | The results of this study relate to the importance of the shared 'social' interactions between mother and nurse and the role these played in developing 'personal' and 'equal' relationships. This allowed the nurse to enter the woman's world and to facilitate their access to psychosocial information that assisted them in validating the woman's experiences, and helped them to plan individualized care that met the needs of the infant, mother and family | 3 |

|                     |             |                                                                                 |                                                                                                                                                            |                         |                                                                                                                                                                                                                                                                                                                                                                                              |                                                                                                                                                                                                                                                                                                                                                                                                                                                                                                 |                                                                                                                                                                                             |   |
|---------------------|-------------|---------------------------------------------------------------------------------|------------------------------------------------------------------------------------------------------------------------------------------------------------|-------------------------|----------------------------------------------------------------------------------------------------------------------------------------------------------------------------------------------------------------------------------------------------------------------------------------------------------------------------------------------------------------------------------------------|-------------------------------------------------------------------------------------------------------------------------------------------------------------------------------------------------------------------------------------------------------------------------------------------------------------------------------------------------------------------------------------------------------------------------------------------------------------------------------------------------|---------------------------------------------------------------------------------------------------------------------------------------------------------------------------------------------|---|
| Pearson<br>2001 USA | Qualitative | To evaluate a programme to promote positive parenting in NICU (Parent's Circle) | NICU (level III and special care (level II) nurseries 104 parents (59 mothers + 45 fathers) who attended Parent's Circle, + 44 NICU or special care nurses | Interviews              | Parent's Circle: 90-minute information session + support to parents as they cope with early birth – allows parents to tell their story; curriculum based on parents' needs, includes development, how parents can help baby, how baby responds to stimuli, learning to read subtle cues from infant & respond appropriately, getting parents involved in infant care plan, sharing resources | Parents learned that they: could still parent even when baby is in hospital; could receive support from people going through similar experiences. They helped normalise the experience, helped parents to interact with their baby. Book list and classes were available after discharge. Staff reported that attending the Parent's Circle instils confidence in parents, helps them read baby's signals, normalises, introduces concepts such as kangaroo care that parents then want to try. | Attending Parent's Circle helped families gain perspective, feel supported, learn key developmental concepts, locate hospital and community resources, and optimise interaction with infant | 3 |
| Gannon<br>2000 USA  | Case series | To evaluate 'Caring one day at a time' book                                     | NICU 5 pilot families                                                                                                                                      | Survey                  | 'Caring one day at a time' book – three-ring binder book to organise information about child's medical, developmental and financial records from birth until adolescence and beyond                                                                                                                                                                                                          | Allows parents to keep all information together, speeding up process when they have to see a new doctor for example & giving parents more confidence; allows parent to see child's progress (giving hope); allows new professionals to see history/ current status/ current medication etc written down                                                                                                                                                                                         | This family-centred approach with early involvement of families in child's care; enhances communication between families and professionals                                                  | 3 |
| White 2000<br>USA   | Case series | To evaluate feeding support by occupational therapists (OTs)                    | NICU 9 parents of premature infants receiving OT services for                                                                                              | Interview questionnaire | OTs involved in parent education in NICU (e.g. oral-facial stimulation, positioning, oral                                                                                                                                                                                                                                                                                                    | Parents reported receiving education about oral-facial stimulation and oral support techniques (9/9 reported), positioning, typical feeding development (8/9 reported); hands-on training and demonstration reported most frequently.                                                                                                                                                                                                                                                           | Parents perceived OTs were providing effective education & support in infant feeding techniques                                                                                             | 3 |

|                      |                       |                                                            |                                                        |                                                                                                        |                                                                                                                                                                  |                                                                                                                                                                                                                                                                                                                                                                                                                                                                    |                                                                                                                                                                                                          |   |
|----------------------|-----------------------|------------------------------------------------------------|--------------------------------------------------------|--------------------------------------------------------------------------------------------------------|------------------------------------------------------------------------------------------------------------------------------------------------------------------|--------------------------------------------------------------------------------------------------------------------------------------------------------------------------------------------------------------------------------------------------------------------------------------------------------------------------------------------------------------------------------------------------------------------------------------------------------------------|----------------------------------------------------------------------------------------------------------------------------------------------------------------------------------------------------------|---|
|                      |                       |                                                            | feeding issues                                         |                                                                                                        | support techniques, typical feeding development) using demonstration, discussion, hands-on training, handouts, videos etc.                                       | Overall, parents felt 'confident' or 'very confident' in their ability to understand topics. 5/9 indicated they thought they would not need additional help after discharge; 3/9 felt they would; 1 unsure.                                                                                                                                                                                                                                                        |                                                                                                                                                                                                          |   |
| Langley 1999 UK      | Cross-sectional study | To evaluate a home support - Community Neonatal Service    | Home                                                   | Questionnaire developed for this study                                                                 | Home support programme                                                                                                                                           | Families reported feeling supported, and appreciated continuity of care after discharge. This benefit was reported more in vulnerable parents (isolated mothers, mothers with babies who had sleeping, crying or feeding problems).                                                                                                                                                                                                                                | Community Neonatal Service provided important support to families where mothers are vulnerable, or where infant has difficulties.                                                                        | 3 |
| Bracht 1998b Canada  | Cross-sectional       | To report parent perceptions of NICU follow-up clinic      | NICU 16 families attending clinic                      | Satisfaction survey – methods not described                                                            | Integrated Neonatal Follow-Up Program: comprehensive, long-term developmental assessments, diagnosis & referral for children at high risk of developmental delay | All families reported that they were very satisfied with services provided by multidisciplinary team; they valued information & support re high risk infant; but needed more information re growth & development, nutrition needs, medical concerns (e.g. asthma).                                                                                                                                                                                                 | Continuity of care provided by clinic staff nurses provided: support, education, written information; maintenance of rapport developed during hospitalisation; and liaison with community resources      | 3 |
| Costello 1998 Canada |                       | To assess mothers' perceptions of Care by Parent programme | NICU and Level II nursery 6 mothers of preterm infants | Interviews the day after Care by Parent overnight stay in hospital, and when baby home at least 4 days | Care by Parent programme – mother stays with baby in room near NICU – assumes all care but help at hand if needed.                                               | Mothers found Care by Parent reassuring to confirm their own and the baby's readiness for discharge; builds confidence in mother's parenting abilities; feeling more comfortable about bringing baby home; feeling confident in taking responsibility, making the right decisions; feeling more secure that mother would wake when baby cried & be able to respond; reassured that baby medically ready to go home (e.g. not having apnoea spells). Helped mothers | Care by Parent gave mothers opportunity to assume full responsibility for baby's care knowing that staff available if necessary. It helped mothers learn caregiving and confirm readiness for discharge. | 3 |

|                        |                 |                                                                       |                                               |                                                                    |                                                                                                                                                                                                                |                                                                                                                                                                                                                                                                                                                                                                                                                                                                                                                                                 |                                                                                                                                                                                                            |   |
|------------------------|-----------------|-----------------------------------------------------------------------|-----------------------------------------------|--------------------------------------------------------------------|----------------------------------------------------------------------------------------------------------------------------------------------------------------------------------------------------------------|-------------------------------------------------------------------------------------------------------------------------------------------------------------------------------------------------------------------------------------------------------------------------------------------------------------------------------------------------------------------------------------------------------------------------------------------------------------------------------------------------------------------------------------------------|------------------------------------------------------------------------------------------------------------------------------------------------------------------------------------------------------------|---|
|                        |                 |                                                                       |                                               |                                                                    |                                                                                                                                                                                                                | learn about infant's pattern of behaviour & responses to infant's cues. Fail-safe opportunity; taking responsibility with a safety net. Opportunity to 'test reality' of parenting – feeling more as though the baby belonged to the mother not the nurses; facilitates transition to parenthood in reality; bridges gap between hospital and home.                                                                                                                                                                                             |                                                                                                                                                                                                            |   |
| Elliott 1998<br>Canada | Qualitative     | To evaluate a telephone follow up programme to support breast-feeding | Home<br>20 mothers                            | Structured interview                                               | Telephone call with structured questions to complete form (e.g. feeding patterns, any problems, plan to address problems, any referrals needed)                                                                | All mothers reported finding telephone call helpful and increasing their confidence in continuing to breast feed.                                                                                                                                                                                                                                                                                                                                                                                                                               | Telephone support can help mothers breastfeed premature infants at home                                                                                                                                    | 3 |
| Koh 1998<br>Australia  | Cross-sectional | To evaluate tape-recording doctor-patient communication               | NICU<br>80 parents of babies admitted to NICU | Questionnaire                                                      | Tape recording initial conversation between parents and neonatologist (covering baby's condition, management, likely progress and outcome) and subsequent important conversations and giving parents the tapes | Parent response rate=76% (75/99). Mothers listened to the tape on average 2.5 times, Fathers listened to the tape on average 1.8 times; tape usefulness rated as 9 (SD: 7-10) by parents. 85% (44/75) of parents who listened to the tapes again found it contained things they had forgotten – some mothers who had been sedated had forgotten the conversation had taken place. Relatives were also able to listen to tape & saved parents repeating what doctor had said. Parents found tapes comforting & supportive. No negative comments. | The tape recording of parent-doctor consultations was useful to parents, particularly in reminding them of information they had forgotten or not heard due to anxiety or sedation during the consultation. | 3 |
| Macnab 1998<br>Canada  | Cross-sectional | Evaluation of Journal writing                                         | Special care nursery (SCN)<br>73 parents      | Survey 6 weeks after giving information booklet on journal writing | Giving information about journal writing                                                                                                                                                                       | 32% kept a journal; 73% found it reduced their stress; 68% used it as a means to address the most stressful elements of the experience (most stressful elements were the feelings engendered by having a baby in special care & interactions with staff; the same                                                                                                                                                                                                                                                                               | Encouraging parents to keep a journal is a constructive way to deal with SCN-related stress.                                                                                                               | 3 |

|                            |             |                                                                                     |                                 |                                                                     |                                                                                                                                             |                                                                                                                                                                                                                                                                                                                                                                                                                                                                                                                                                                                                                                                  |                                                                                                                                         |   |
|----------------------------|-------------|-------------------------------------------------------------------------------------|---------------------------------|---------------------------------------------------------------------|---------------------------------------------------------------------------------------------------------------------------------------------|--------------------------------------------------------------------------------------------------------------------------------------------------------------------------------------------------------------------------------------------------------------------------------------------------------------------------------------------------------------------------------------------------------------------------------------------------------------------------------------------------------------------------------------------------------------------------------------------------------------------------------------------------|-----------------------------------------------------------------------------------------------------------------------------------------|---|
|                            |             |                                                                                     |                                 |                                                                     |                                                                                                                                             | percentage as those talking things through with a friend to reduce stress). Journals were used to document involvement in care (45%), record keeping (36%) and organising thoughts (27%). All those who kept a journal recommended it to others. Positive feelings were holding baby for the first time; meeting & speaking with other parents; openness and honesty of nursery staff; impression that infant was loved and cared for. Parents said the journal would be a record for the child for later; helped to record progress & show how well parents coped. Parents made suggestions that photos etc should be included in the journals. |                                                                                                                                         |   |
| Griffin<br>1997<br>USA     | Qualitative | To evaluate a tour of neonatal unit prior to birth if high risk pregnancy diagnosed | NICU<br>10 mothers<br>3 fathers | Interview                                                           | Tour of NICU                                                                                                                                | All parents recommended that parents diagnosed with a high-risk pregnancy be offered a prenatal tour of the NICU. The tour benefited parents and (a) decreased fears, (b) inspired hope for the infant's prognosis, (c) provided reassurance about the care in the NICU, and (d) prepared parents for their infant's hospitalization in the NICU                                                                                                                                                                                                                                                                                                 |                                                                                                                                         | 3 |
| Swanson<br>1997 USA        | Case series | Evaluation of neonatal integrated home care program                                 | NICU/ home                      | Descriptive                                                         | Neonatal integrated Home Care Program – follow up care to high risk neonates at home, teaching re specific infant care needs (e.g. feeding) | Program made it possible to bring home baby, nurse provided help, support, instruction & encouragement (e.g. with nasogastric feeding tube)                                                                                                                                                                                                                                                                                                                                                                                                                                                                                                      | Families supported to take high risk infants home sooner, ease transition from NICU to home & keep them home (i.e. reduce readmissions) | 3 |
| Costello<br>1996<br>Canada | Qualitative | To describe a parent information binder system of individualising info for          | NICU                            | 'Written and verbal feedback' on the binder – not formal assessment | Parent information binder<br><br>Includes relevant individualised information for                                                           | Binder facilitates organisation of information over time and therefore parents were empowered to be active in acquiring information relevant to their particular infant; and had improved understanding and ability to participate in decision-making. Helps ensure                                                                                                                                                                                                                                                                                                                                                                              | Facilitates collaboration between parents and health professionals, keeps parents informed, aids decision making.                       | 3 |

|                  |             |                                                                               |                                |                                                                                                                                         |                                                                                                                                                                                         |                                                                                                                                                                                                                                                                                                                                                                                                                                                                                                                                                                                                            |                                                                                                                                                                                           |   |
|------------------|-------------|-------------------------------------------------------------------------------|--------------------------------|-----------------------------------------------------------------------------------------------------------------------------------------|-----------------------------------------------------------------------------------------------------------------------------------------------------------------------------------------|------------------------------------------------------------------------------------------------------------------------------------------------------------------------------------------------------------------------------------------------------------------------------------------------------------------------------------------------------------------------------------------------------------------------------------------------------------------------------------------------------------------------------------------------------------------------------------------------------------|-------------------------------------------------------------------------------------------------------------------------------------------------------------------------------------------|---|
|                  |             | parents on NICU                                                               |                                |                                                                                                                                         | parents about their infants – e.g. admission, feeding, parent clinical, and discharge. Binder taken to weekly parent support group meetings where info can be added or questions asked. | consistent communication between health professionals and parents, and health professionals know what has already been shared with parents                                                                                                                                                                                                                                                                                                                                                                                                                                                                 |                                                                                                                                                                                           |   |
| Jarrett 1996 USA | Case series | Evaluation of parent support programme                                        | Neonatal unit                  | Reported discussion                                                                                                                     | Parents were trained to be parent partners – being taught factual information and to be active listeners. Trained parents matched with new parents by infant characteristics            | Parents reported feeling less anxious and less worried about their infant. The program was meeting its goal of support and programme provided a special relationship where parents in the NICU could take their worries and concerns. This relationship was most often nurtured through exchanges on the telephone, but parents also met in the parent lounge that was set up as part of the parent support effort in the hospital.<br><br>New parents unanimously reported that the most helpful thing about the program was the comfort in talking with someone who had experienced a similar situation. | The parent support programme has provided parents with trained partner parents reducing parents level of anxiety and improving their confidence with their infant.                        | 3 |
| Drake 1995 USA   |             | To assess a method of prioritising information needs of parents for discharge | NICU Pilot study of 10 parents | Q-sort – ranking of topics in order of priority to parents for learning prior to discharge; feedback on how easy Q-sort was to complete | Card sort method of prioritising teaching/learning topics that parents need prior to discharge                                                                                          | Parents sorted 14 topics into most important, important, and least important piles and had opportunity to add in 3 other topics they wanted. Parents' highest priorities were infant CPR, illness and development, with feeding, giving medication & hygiene issues medium priority and use of car seat & getting help at home low priorities. Parents and nurses found it helpful to assess what parents needed to know – better than closed questions to parents like 'Do you know how to give the baby a bath?' which can be threatening                                                                | Parents are the best sources to assess their learning needs, and addressing topics parents feel are important helps teaching and learning, especially if nurse does not know family well. |   |
| Legault          | Cross-      | Effects of                                                                    | NICU                           | Satisfaction questionnaire                                                                                                              | Kangaroo (skin to                                                                                                                                                                       | Kangaroo method was preferred by                                                                                                                                                                                                                                                                                                                                                                                                                                                                                                                                                                           | Kangaroo method encourages early contact                                                                                                                                                  | 3 |



|                        |                                                 |                                                              |                                                                                                 |                                                                                                                                                                 |                                                              |                                                                                                                                                                                                                                                                                                                            |                                                                                                                  |   |
|------------------------|-------------------------------------------------|--------------------------------------------------------------|-------------------------------------------------------------------------------------------------|-----------------------------------------------------------------------------------------------------------------------------------------------------------------|--------------------------------------------------------------|----------------------------------------------------------------------------------------------------------------------------------------------------------------------------------------------------------------------------------------------------------------------------------------------------------------------------|------------------------------------------------------------------------------------------------------------------|---|
| 1995<br>Canada         | sectional                                       | kangaroo (skin to skin) care                                 | 61 mother-infant dyads experiencing both traditional and kangaroo-type transfers from incubator | Maternal Satisfaction Question-naire                                                                                                                            | skin) care                                                   | 73.8% of mothers, mainly because the infant was closer to them and they could touch them more easily.                                                                                                                                                                                                                      | with infant& induces feelings of wellbeing & fulfilment in parents                                               |   |
| Affonso<br>1993, USA   | Qualitative                                     | Evaluation of Skin to skin care (SSC) for premature infants  | NICU Mothers                                                                                    | Interview                                                                                                                                                       | Kangaroo care                                                | SSC provided a way for mothers to know their infants, to develop strong positive feelings towards them, and to reconcile their feelings about having a premature birth, so that emotional healing could take place.                                                                                                        | Kangaroo care improved mother-infant interactions.                                                               | 3 |
| Gale 1993<br>USA       | Case series                                     | Effects of kangaroo (skin to skin) care                      | NICU 25 intubated infants and their parents                                                     | Interviews                                                                                                                                                      | Kangaroo (skin to skin) care                                 | Parents described kangaroo care as beneficial, giving stronger identity with and knowledge of infant; greater confidence in infant's need for them and their ability to need these needs; greater confidence in asking questions                                                                                           | Nurses can support parental attachment by supporting kangaroo holding                                            | 3 |
| Meier 1993<br>USA      | Cross-sectional                                 | Breast feeding support                                       | NICU 132 parents of premature infants                                                           | Survey                                                                                                                                                          | Breast feeding intervention record                           | Mothers more likely to be breast feeding than comparable populations                                                                                                                                                                                                                                                       | Breast feeding support encourages mothers in the NICU to breast feed and to continue to breast feed for longer.  | 3 |
| Culp 1989<br>USA       | Cohort                                          | Demonstrating assessment of Premature Infant Behavior (APIB) | NICU 14 couples + premature infants (<32 weeks)                                                 | Alternate allocation to demonstration of assessment (2 weeks before assessment of outcome) or not until afterwards<br><br>STAI<br>Neonatal Perception Inventory | Demonstrating assessment of Premature Infant Behavior (APIB) | Intervention fathers reported lower anxiety than non-intervention fathers ( $p<0.05$ ). Both mothers and fathers in intervention group had more realistic perception of newborns ( $p<0.04$ ). Intervention mothers more aware of newborn's abilities to shut out disturbing stimulation on repeated exposure ( $p<0.02$ ) | Intervention appeared to reduce paternal anxiety and fostered more realistic perceptions of the premature infant | 3 |
| Szajnberg<br>1987, USA | Qualitative (within cohort for infant outcomes) | Evaluation of Brazelton Newborn Behavioural Assessment Scale | Home                                                                                            | Structured interview                                                                                                                                            | BNBAS                                                        | At 6 months, mothers in the intervention group remembered more details from the BNBAS than control mothers did of the standard physical examinations. Intervention mothers tried more exam items at home and found more of the                                                                                             |                                                                                                                  | 3 |

1  
2  
3  
4  
5  
6  
7  
8  
9  
10  
11  
12  
13  
14  
15  
16  
17  
18  
19  
20  
21  
22  
23  
24  
25  
26  
27  
28  
29  
30  
31  
32  
33  
34  
35  
36  
37  
38  
39  
40  
41  
42  
43  
44  
45  
46  
47

|                 |              |                                                  |                                                            |                     |                                                |                                                                                                                                                                                                                                                                                                                                                                                                                                                                                                                                                                                                                                                                                                                                          |                                                                                                                                                      |   |
|-----------------|--------------|--------------------------------------------------|------------------------------------------------------------|---------------------|------------------------------------------------|------------------------------------------------------------------------------------------------------------------------------------------------------------------------------------------------------------------------------------------------------------------------------------------------------------------------------------------------------------------------------------------------------------------------------------------------------------------------------------------------------------------------------------------------------------------------------------------------------------------------------------------------------------------------------------------------------------------------------------------|------------------------------------------------------------------------------------------------------------------------------------------------------|---|
|                 |              | (BNBAS)                                          |                                                            |                     |                                                | items helpful. There was a trend for mothers to visit their infants more often after the intervention.                                                                                                                                                                                                                                                                                                                                                                                                                                                                                                                                                                                                                                   |                                                                                                                                                      |   |
| Zeanah 1984 USA | Case reports | Psychotherapy                                    | NICU                                                       | Interview           | Psychotherapy                                  | Psychotherapy helped parents accept their feelings and conflicts as common to many NICU parents; Case conferences helped clarify misconceptions that had arisen because of the large number of people involved in baby's care. When unable to travel to unit, calls kept parents informed, enhanced participation; consistency maintained in information given, questions encouraged. Parents were encouraged to make tape of themselves singing & talking to baby, telling stories so that they could 'be with' her even when they were at home; encouraged to discuss using photo of infant. Became able to discuss disappointment about babies many problems and anxiety about long-term effects & involvement with babies increased. | Psychotherapy as crisis intervention, supportive and insight-orientated (awareness that conflicts interfere with optimal parent-infant relationship) | 3 |
| Dammers 1982 UK | Case Series  | To report parents' perceptions of support group  | Neonatal unit                                              | Reported discussion |                                                | Parents reported having increased knowledge and greater confidence in caring for their infant                                                                                                                                                                                                                                                                                                                                                                                                                                                                                                                                                                                                                                            | Parents found the support group beneficial in increasing their knowledge and confidence                                                              | 3 |
| Isaacs 1980 USA | Case series  | Evaluation of newborn Intensive Care Coordinator | Home 40 families of high-risk infants discharged from NICU | Questionnaire       | Home visits for teaching, guidance and support | More than 2/3 parents felt concerned about infant discharge and had anxiety about caring for infant at home. All families strongly agreed that the coordinator made families feel completely comfortable, they had complete trust in her, she was available, she gave emotional support, felt they could discuss fear & worries with her, and helped them mother infant. Teaching gave support, confidence & necessary skills.                                                                                                                                                                                                                                                                                                           | Coordinator met the needs of parents                                                                                                                 | 3 |

## Acknowledgements

The study was funded by the Big Lottery Fund, and the collaborating organisations included the Royal College of Nursing Institute, the National Childbirth Trust (NCT), the Warwickshire NCT Pre-term Support Group, and BLISS, the premature baby charity. The Parents of Premature Babies (POPPY) project was supported by an advisory group whose membership which consisted of the following people: Charlotte Bennett, Peter Beresford (Chair), Debbie Bick, Maggie Redshaw, Nicola Crichton, Phillipa Goodger, Gill Gyte, Merryl Harvey, Yana Richens, Claire Pimm. The searches for this review were conducted by Paul Miller, Senior Information Specialist, Royal College of Physicians.

### **Ethics Approval:**

Ethics approval was gained for the study through MREC, South East Ethics Research Unit (ref: 06/MRE 01/6)

**Funder:** This study was funded by the Big Lottery

**Guarantor:** The University of Warwick, Coventry, CV7 4AL is the guarantor of this study

### **WHAT IS ALREADY KNOWN ON THIS TOPIC**

It has long been recognised that family-centred care at the neonatal unit is beneficial not only for the parents of premature infants, but for the infants themselves. While the importance of family-centred care is known, neonatal units are unsure which are the most effective family-centred care interventions to support, communicate with, and provide information to the parents

### WHAT THIS STUDY ADDS

The evidence from the systematic review provides a summary pathway of family-centred care interventions to assist in providing support, information and communication with parents of premature infants throughout their stay at the neonatal unit and after discharge home.

#### Copyright statement:

"the Corresponding Author (Jo Brett) has the right to grant on behalf of all authors and does grant on behalf of all authors, an exclusive licence (or non exclusive for government employees) on a worldwide basis to the BMJ Publishing Group Ltd to permit this article (if accepted) to be published in BMJ Open and any other BMJPG products and sublicences such use and exploit all subsidiary rights, as set out in our licence."

#### Competing interest form:

Please answer the following questions

1. Have you in the past five years accepted the following from an organisation that may in any way gain or lose financially from the publication of this paper:
  - No\_ Reimbursement for attending a symposium?
  - No\_ A fee for speaking?
  - No\_ A fee for organising education?
  - No\_ Funds for research?
  - No\_ Funds for a member of staff?
  - No\_ Fees for consulting?
2. Have you in the past five years been employed by an organisation that may in any way gain or lose financially from the publication of this paper? No
3. Do you hold any stocks or shares in an organisation that may in any way gain or lose financially from the publication of this paper? No
4. Have you acted as an expert witness on the subject of your study, review, editorial, or letter? No
5. Do you have any other competing financial interests? If so, please specify. No

#### Contributorship statement

JB conducted the systematic review, sat on the advisory group and steering group for the study, synthesized the evidence and wrote the drafts of the paper.

SS was the principal investigator of the study, obtaining funding for the study, sat on the advisory group and steering groups for the study, over saw all stages of the study, assisted in the identification and quality assessment of the evidence, and assisted in the writing of the first draft of the paper.

1  
2  
3 MN was the fund holder, sat on the advisory group and steering group of the study and  
4 commented on the synthesis of the evidence and draft papers.  
5

6  
7 NJ was the patient representative on this study. She was integral in the development of this  
8 project, in the development of the proposal, sat on the advisory group and the steering  
9 group, and commented on the synthesis of the data and the drafts of the paper  
10

11 LT was integral in the development of this project, in the development of the proposal, sat  
12 on the advisory group and the steering group, and commented on the synthesis of the data  
13 and the drafts of the paper  
14  
15

### 16 17 **Funding statement**

18  
19 The work was supported by the Big Lottery, grant number: RG/1/01014958  
20  
21  
22  
23  
24  
25  
26  
27  
28  
29  
30  
31  
32  
33  
34  
35  
36  
37  
38  
39  
40  
41  
42  
43  
44  
45  
46  
47  
48  
49  
50  
51  
52  
53  
54  
55  
56  
57  
58  
59  
60

## References

1. Lau R, Morse C. Experiences of parents with premature infants hospitalised in neonatal intensive care units: a literature review. *Journal of Neonatal Nursing* 1998; 4: 23-9.
2. Stjernqvist K. Extremely low birthweight infants. Development, behaviour and impact on the family. Academic dissertation, Department of Applied Psychology, Paediatrics and Child and Youth Psychiatry, University of Lund, Sweden 1992
3. Veddovi M, Kerry DI, Gibson F, Bowen J, Stante D. The relationship between depressive symptoms following premature birth, mothers' coping style, and knowledge of infant development. *Journal of Reproductive and Infant Psychology* 2001, 19 (4): 313-323.
4. Singh D, Newburn M. *Becoming a father – Mens' access to information and support about pregnancy, birth and life with a new baby*. London 2000: The National Childbirth Trust
5. Melnyk BM, Feinstein NF, Alpert-Gillis L, Fairbanks E, Crean HF, Sinkin RA, Stone PW, Small L, Tu X, Gross SJ. Reducing premature infants' length of stay and improving parents' mental health outcomes with the Creating Opportunities for Parent Empowerment (COPE) neonatal intensive care unit program: a randomized, controlled trial. *Pediatrics* 2006 Nov;118(5):e1414-27
6. Finello KM, Litton KM, de Lemos R, Chan LS. Very low birth weight infants and their families during the first year of life: comparisons of medical outcomes based on after care services. *Journal of Perinatology* 1998;18:365-71.
7. Gray JE, Safron RB, Davis G, Pompilio-Weitzner JE, Zaccagnini L, Pursley D. Baby care link: Using the internet and telemedicine to improve care for high risk infants in pediatrics 2000; 106:1318-1324
8. Harrison H. The Principles for family centred neonatal care. *Pediatrics* 1993 Nov; 92 (5)
9. Systematic reviews: CRD's guidance for undertaking reviews in health care, NHS Centre for Reviews and Dissemination, University of York, 2008, <http://www.york.ac.uk/inst/crd/publications.htm>
10. Scottish Intercollegiate Guidelines Network (SIGN). *Sign 50: A Guideline Developer's handbook*, Jan 2008.
11. Als H, Gilkerson L, Duffy FH, McAnulty GB, Buehler DM, VandenBerg K et al. A three-center, randomized, controlled trial of individualized developmental care for very low birth weight preterm infants: Medical, neurodevelopmental, parenting, and caregiving effects. *Journal of Developmental and Behavioral Pediatrics* 2003;24:399-408.
12. Van der Pal S, Macguire C, Cessie S, Wit J, Waither F, Brull J. Parental experiences during the first phase at the neonatal intensive care unit after two developmental care interventions. *Acta Paediatrica* 2007; 96,1611-1616

- 1  
2  
3 13. Wielenga J, Smit B, Unk L. How satisfied are parents supported by nurses with the  
4 NIDCAP model of care for their preterm infant? *Journal of Nursing Care Quality* 2006;  
5 21(1):41-48.  
6  
7
- 8  
9 14. Kaaresen P I, Rønning J A, Ulvund S E, Dahl L B. A randomized, controlled trial of the  
10 effectiveness of an early-intervention program in reducing parenting stress after preterm  
11 birth. *Pediatrics* 2006;118(1):e9-19.  
12
- 13 15. Rauh VA, Nurcombe B, Achenbach T, Howell C. The Mother-Infant Transaction  
14 Program. The content and implications of an intervention for the mothers of low-  
15 birthweight infants. *Clinics in Perinatology* 1990;17:31-45.  
16  
17
- 18 16. Nurcombe B, Howell DC, Rauh VA, Teti DM, Ruoff P, Brennan J. An intervention  
19 program for mothers of low-birthweight infants: preliminary results. *Journal of the*  
20 *American Academy of Child Psychiatry* 1984;23:319-25.  
21  
22
- 23 17. Sumner G, Spietz A. NCATS Caregiver/Parent-Child interaction teaching manual.  
24 Seattle, WA: NCATS Publications, University of Washington, School of Nursing 1994.  
25
- 26 18. Browne JV, Talmi A. Family-based intervention to enhance infant-parent relationships in  
27 the neonatal intensive care unit. *Journal of Pediatric Psychology* 2005;30:667-77.  
28
- 29 19. Meyer E, Coll C, Seifer R, Ramos A, et al. Psychological distress in mothers of preterm  
30 infants. *Journal of Developmental & Behavioral Pediatrics* 1995;16:412-7.  
31  
32
- 33 20. Glazebrook C, Marlow N, Israel C, Croudace T, Johnson S, White I et al. Randomised  
34 trila of a parenting intervention during neonatal intensive care. *Archives of Disease in*  
35 *childhood-Fetal and Neonatal Edition* 2007; 1-16  
36  
37
- 38 21. Parker-Loewen DL. Effects of short-term interaction coaching with mothers of preterm  
39 infants. *Infant Mental Health Journal* 1987; 8:277-87.  
40  
41
- 42 22. Byers JF, Lowman LB, Francis J, Kaigle L, Lutz NH, Waddell T et al. A quasi-  
43 experimental trial on individualized, developmentally supportive family-centered care.  
44 *JOGNN - Journal of Obstetric, Gynecologic, & Neonatal Nursing* 2006; 35:105-15.  
45  
46
- 47 23. Lawhon G. Facilitation of parenting the premature infant within the newborn intensive  
48 care unit. *Journal of Perinatal and Neonatal Nursing* 2002;16:71-82.  
49  
50
- 51 24. Prentice M, Stainton MC. The effects of developmental care of preterm infants on  
52 women's health and family life. *Neonatal, Paediatric & Child Health Nursing* 2004;7:4-  
53 12.  
54  
55
- 56 25. Hawthorne J. Using the Neonatal Behavioural Assessment Scale to support parent-  
57 infant relationships. *Infant* 2005;1:213-8.  
58  
59
- 60 26. Culp RE, Culp AM, Harmon RJ. A tool for educating parents about their premature  
infants. *Birth* 1989;16:23-6.

- 1  
2  
3  
4  
5  
6  
7  
8  
9  
10  
11  
12  
13  
14  
15  
16  
17  
18  
19  
20  
21  
22  
23  
24  
25  
26  
27  
28  
29  
30  
31  
32  
33  
34  
35  
36  
37  
38  
39  
40  
41  
42  
43  
44  
45  
46  
47  
48  
49  
50  
51  
52  
53  
54  
55  
56  
57  
58  
59  
60
27. Szajenberg N, Ward MJ, Krauss A, Kessler DB. Low birth-weight prematures: preventive intervention and maternal attitude. *Child Psychiatry & Human Development* 1987;17:152-65.
  28. Hall WA, Shearer K, Mogan J, Berkowitz J. Weighing preterm infants before & after breastfeeding: does it increase maternal confidence and competence? *MCN, American Journal of Maternal Child Nursing* 2002;27:318-26.
  29. Meier PP, Engstrom JL, Mangurten HH, Estrada E, Zimmerman B, Kopparthi R. Breastfeeding support services in the neonatal intensive-care unit. *JOGNN - Journal of Obstetric, Gynecologic, & Neonatal Nursing* 1993;22:338-47.
  30. White JC, Smith MM, Lowman DK, Reidy TG, Murphy SM, Lane SJ. Parent support of feeding in the neonatal intensive care unit: perspectives of parents and occupational therapists. *Physical and Occupational Therapy in Pediatrics* 2000;19:111-26.
  31. Elliott S, Reimer C. Postdischarge telephone follow-up program for breastfeeding preterm infants discharged from a special care nursery. *Neonatal Network - Journal of Neonatal Nursing* 1998;17:41-5.
  32. Tessier R, Cristo M, Velez S, Giron M, de Calume ZF, Ruiz-Palaez JG et al. Kangaroo mother care and the bonding hypothesis. *Pediatrics* 1998;102:e17.
  33. Lai HL, Chen CJ, Peng TC, Chang FM, Hsieh ML, Huang HY et al. Randomized controlled trial of music during kangaroo care on maternal state anxiety and preterm infants' responses. *International Journal of Nursing Studies* 2006;43:139-46.
  34. Feldman R, Eidelman AI, Sirota L, Weller A. Comparison of skin-to-skin (kangaroo) and traditional care: parenting outcomes and preterm infant development. *Pediatrics* 2002;110:16-26.
  35. Legault M, Goulet C. Comparison of kangaroo and traditional methods of removing preterm infants from incubators. *JOGNN - Journal of Obstetric, Gynecologic, & Neonatal Nursing* 1995;24:501-6.
  36. Affonso D, Bosque E, Wahlberg V, Brady JP. Reconciliation and healing for mothers through skin-to-skin contact provided in an American tertiary level intensive care nursery. *Neonatal Network: The Journal of Neonatal Nursing* 1993;12:25-32.
  37. Gale G, Franck L, Lund C. Skin-to-skin (kangaroo) holding of the intubated premature infant. *Neonatal Network - Journal of Neonatal Nursing* 1993;12:49-57.
  38. Ferber SG, Ruth Feldman, David Kohelet, Jacob Kuint, Shaul Dollberg, Eliana Arbel and Aron Weller. Massage therapy facilitates mother-infant interaction in premature infants *Infant Behavior and Development* 2005; 28 (1): 74-81.



- 1  
2  
3  
4  
5  
6  
7  
8  
9  
10  
11  
12  
13  
14  
15  
16  
17  
18  
19  
20  
21  
22  
23  
24  
25  
26  
27  
28  
29  
30  
31  
32  
33  
34  
35  
36  
37  
38  
39  
40  
41  
42  
43  
44  
45  
46  
47  
48  
49  
50  
51  
52  
53  
54  
55  
56  
57  
58  
59  
60
39. Remedios CM. Evaluation of massage programme for premature infants. *Physiotherapy Singapore* 2005; 8:4-7.
  40. Roman R. *Research in nursing and health* 1995;18 (5): 385-394
  41. Preyde M, Ardal F. Effectiveness of a parent "buddy" program for mothers of very preterm infants in a neonatal intensive care unit. *CMAJ Canadian Medical Association Journal* 2003;168:969-73.
  42. Lindsay JK, Roman L, DeWys M, Eager M, Levick J, Quinn M. Creative caring in the NICU: parent-to-parent support. *Neonatal Network - Journal of Neonatal Nursing* 1993;12:37-44.
  43. Pearson J, Andersen K. Evaluation of a program to promote positive parenting in the neonatal intensive care unit. *Neonatal Network - Journal of Neonatal Nursing* 2001;20:43-8.
  44. Buarque V, de Carvaiho Lima M, Parry Scott R, Vasconcelos M, The influence of support groups on the family of risk newborns and on neonatal unit workers. *Journal de pediatria* 2006; 82 (4): 295-301
  45. Hurst I. One size does not fit all: Parents evaluation of a support program in the neonatal intensive care nursery. *Journal of Perinatal and Neonatal Nursing* 2006; 20(3): 252-261
  46. Bracht M, Ardal F, Bot A, Cheng CM. Initiation and maintenance of a hospital-based parent group for parents of premature infants: key factors for success. *Neonatal Network - Journal of Neonatal Nursing* 1998;17:33-7.
  47. Dammers J, Harpin V. Parents' meetings in two neonatal units: a way of increasing support for parents. *British Medical Journal Clinical Research Ed.* 1982;285:863-5.
  48. Jarrett MH. Family matters. Parent partners: a parent-to-parent support program in the NICU part II: program implementation. *Pediatric Nursing* 1996;22:142-4.
  49. Cobiella CW, Mabe PA, Forehand RL. A comparison of two stress-reduction treatments for mothers of neonates hospitalized in a neonatal intensive care unit. *Children's Health Care* 1990;19:93-100.
  50. Jotzo M, Poets CF. Helping parents cope with the trauma of premature birth: an evaluation of a trauma-preventive psychological intervention. *Pediatrics* 2005;115:915-9.
  51. Macnab AJ, Beckett LY, Park CC, Sheckter L. Journal writing as a social support strategy for parents of premature infants: a pilot study. *Patient Education & Counseling* 1998;33:149-59.

- 1  
2  
3  
4  
5  
6  
7  
8  
9  
10  
11  
12  
13  
14  
15  
16  
17  
18  
19  
20  
21  
22  
23  
24  
25  
26  
27  
28  
29  
30  
31  
32  
33  
34  
35  
36  
37  
38  
39  
40  
41  
42  
43  
44  
45  
46  
47  
48  
49  
50  
51  
52  
53  
54  
55  
56  
57  
58  
59  
60
52. Zeanah CH, Canger CI, Jones JD. Clinical approaches to traumatized parents: psychotherapy in the intensive-care nursery. *Child Psychiatry & Human Development* 1984;14:158-69.
53. Huckabay LM. The effect on bonding behavior of giving a mother her premature baby's picture. *Scholarly Inquiry for Nursing Practice* 1999;13:349-62.
54. Griffin T, Kavanaugh K, Soto CF, White M. Parental evaluation of a tour of the neonatal intensive care unit during a high-risk pregnancy. *JOGNN - Journal of Obstetric, Gynecologic, & Neonatal Nursing* 1997;26:59-65.
55. Koh T, Butow P, Coorey M, Budge D, Collie L, Whitehall J, Tattersal M. Provision of taped conversations with neonatologists to mothers of babies in intensive care: randomised controlled trial. *BMJ* 2007;334:28.
56. Penticuff JH, Arheart KL. Effectiveness of an intervention to improve parent-professional collaboration in neonatal intensive care. *Journal of Perinatal & Neonatal Nursing* 2005;19:187-202.
57. Piecuch RE, Roth RS, Clyman RI, Sniderman SH, Riedel PA, Ballard RA. Videophone use improves maternal interest in transported infants. *Critical Care Medicine* 1983;11:655-6.
58. Jones L Woodhouse D, Rowe J. Effective nurse-parent communications: A study of parents perceptions in the NICU environment. *Patient Education and Counseling* 2007;69:206-212
59. Fenwick J, Barclay L, Schmied V. "Chatting". An important tool for facilitating mothering in the neonatal nursery. *Journal of Advanced Nursing* 2001; 33(5): 583-593.
60. Freer Y, Lyon A, Stenson B, Coyle C. BabyLink – improving communication among clinicians and with parents with babies in intensive care *British Journal of Healthcare Computing and Information Management*. 2005, 22(2): 34-36
61. Koh TH, Jarvis C. Promoting effective communication in neonatal intensive care units by audiotaping doctor-parent conversations. *International Journal of Clinical Practice* 1998;52:27-9.
62. Brown KA, Sauve RS. Evaluation of a caregiver education program: home oxygen therapy for infants. *JOGNN: Journal of Obstetric, Gynecologic, and Neonatal Nursing* 1994;23:429-35.
63. Costello A, Bracht M, Van Camp K, Carman L. Parent information binder: individualizing education for parents of preterm infants. *Neonatal Network - Journal of Neonatal Nursing* 1996;15:43-6.
64. Gannon BA. Caring one day at a time. *Neonatal Network: The Journal of Neonatal Nursing* 2000;19:25-32.

- 1  
2  
3  
4  
5  
6  
7  
8  
9  
10  
11  
12  
13  
14  
15  
16  
17  
18  
19  
20  
21  
22  
23  
24  
25  
26  
27  
28  
29  
30  
31  
32  
33  
34  
35  
36  
37  
38  
39  
40  
41  
42  
43  
44  
45  
46  
47  
48  
49  
50  
51  
52  
53  
54  
55  
56  
57  
58  
59  
60
65. Drake E. Discharge teaching needs of parents in the NICU. *Neonatal Network - Journal of Neonatal Nursing* 1995;14:49-53.
66. Kowalski W, Leef K, Mackley L, Spear M, Locke R. Communicating with parents of premature infants: How is the informant. *Journal of perinatology* 2006; 26:44-48.
67. Barrera ME, Rosenbaum PL, Cunningham CE. Early home intervention with low-birth-weight infants and their parents. *Child Development* 1986;57:20-33.
68. Ortenstrand A, Winbladh B, Nordstrom G, Waldenstrom U. Early discharge of preterm infants followed by domiciliary nursing care: parents' anxiety, assessment of infant health and breastfeeding.[see comment]. *Acta Paediatrica* 2001;90:1190-5.
69. Broedsgaard A, Wagner L. How to facilitate parents and their premature infant for the transition home. *International Nursing Review* 2005;52:196-203.
70. Jonsson L, Fridlund B. Parents' conceptions of participating in a home care programme from NICU: a qualitative analysis. *Vard I Norden* 2003 ;23:35-9.
71. Costello A, Chapman J. Mothers' perceptions of the care-by-parent program prior to hospital discharge of their preterm infants. *Neonatal Network - Journal of Neonatal Nursing* 1998;17:37-42.
72. Bennett R, Sheridan C. Mothers' perceptions of 'rooming-in' on a neonatal intensive care unit. *Infant* 2005;1:171-4.
73. Spiker D, Ferguson J, Brooks G. Enhancing maternal interactive behavior and child social competence in low birth weight, premature infants. *Child development* 1993;64:754-68.
74. Ross GS. Home intervention for premature infants of low-income families. *American Journal of Orthopsychiatry* 1984;54:263-70.
75. Leonard BJ, Scott SA, Sootsman J. A home-monitoring program for parents of premature infants: a comparative study of the psychological effects. *Journal of Developmental & Behavioral Pediatrics* 1989;10:92-7.
76. Kurz H, Neunteufl R, Eichler F, Urschitz M, Tiefenthaler M. Does professional counseling improve infant home monitoring? Evaluation of an intensive instruction program for families using home monitoring on their babies. *Wiener Klinische Wochenschrift* 2002; 114:801-6.

- 1  
2  
3  
4  
5  
6  
7  
8  
9  
10  
11  
12  
13  
14  
15  
16  
17  
18  
19  
20  
21  
22  
23  
24  
25  
26  
27  
28  
29  
30  
31  
32  
33  
34  
35  
36  
37  
38  
39  
40  
41  
42  
43  
44  
45  
46  
47  
48  
49  
50  
51  
52  
53  
54  
55  
56  
57  
58  
59  
60
77. Resnick MB, Armstrong S, Carter RL. Developmental intervention program for high-risk premature infants: effects on development and parent-infant interactions. *Journal of Developmental & Behavioral Pediatrics* 1988;9:73-8.
78. Langley D, Hollis S, MacGregor D. Parents' perceptions of neonatal services within the community: a postal survey. *Journal of Neonatal Nursing* 1999;5:7-11.
79. Isaacs PC. Teaching parents with high-risk infants in the home. *Patient Counselling & Health Education* 1980;2:84-6.
80. Swanson SC, Naber MM. Neonatal integrated home care: nursing without walls. *Neonatal Network - Journal of Neonatal Nursing* 1997;16:33-8.
81. Rycroft-Malone J, Seers K, Titchen A, Harvey G, Kitson A, McCormack B. What counts as evidence in evidence-based practice? *Journal of Advanced Nursing* 2004; 47(1): 81-90
82. Staniszewska S, West Meeting the patient partnership agenda: the challenge for health care workers. *International Journal for Quality in Health Care* 2004; 16 (1): 3-5

1  
2  
3  
4  
5  
6  
7  
8  
9  
10  
11  
12  
13  
14  
15  
16  
17  
18  
19  
20  
21  
22  
23  
24  
25  
26  
27  
28  
29  
30  
31  
32  
33  
34  
35  
36  
37  
38  
39  
40  
41  
42  
43  
44  
45  
46  
47  
48  
49  
50  
51  
52  
53  
54  
55  
56  
57  
58  
59  
60

Figure 1: The results from the literature search.

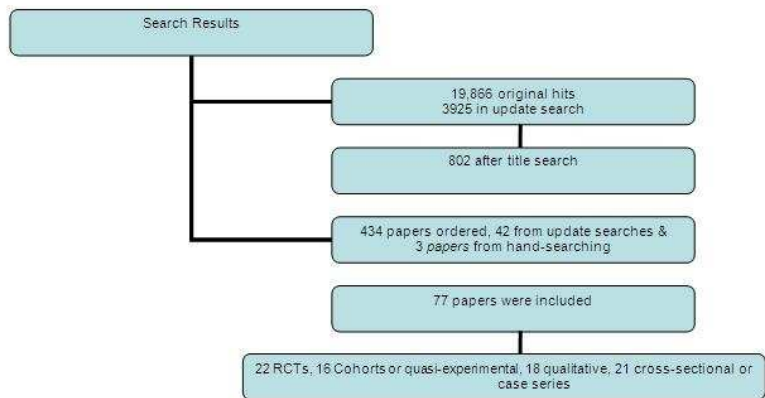

209x137mm (96 x 96 DPI)

Review only

Figure 2: Individualised developmental and behavioural care programmes

- 1) COPE<sup>(4)</sup> (Creating Opportunities for Parent Empowerment) provides an educational programme for parents at the neonatal unit on the appearance and behavioural characteristics of pre-term infants, how parents can participate in their infant's care, and how parents can make more positive interactions with their infant.
- 2) NIDCAP<sup>(11,12,13)</sup> (Neonatal Individualised Developmental Care and Assessment Programme) is an intervention that stimulates pre-term infants and improves the interaction between mothers and infants
- 3) MITP (Mother-Infant Transaction Programme)<sup>(14,15,16)</sup> helps to enable the parents to appreciate their infant's unique characteristics, temperament, and developmental potential, sensitising parents to their infant's cues so that they can respond appropriately.
- 4) NCATS (Nursing Child Assessment Teaching Scale) NCATS (Nursing Child Assessment Teaching Scale)<sup>(17)</sup>: Examines the mother-child relationship in conjunction with teaching mothers how to interact with the baby, teaching behavioural cues, how to play etc
- NB:** While the developmental care programmes are designed to improve the development of the baby, these interventions give parents psychological support and practical guidance on how to care for their infants. |

1  
2  
3  
4  
5  
6  
7  
8  
9  
10  
11  
12  
13  
14  
15  
16  
17  
18  
19  
20  
21  
22  
23  
24  
25  
26  
27  
28  
29  
30  
31  
32  
33  
34  
35  
36  
37  
38  
39  
40  
41  
42  
43  
44  
45  
46  
47  
48  
49  
50  
51  
52  
53  
54  
55  
56  
57  
58  
59  
60

**Figure 2: Summary of POPPY Systematic Review - Pre neonatal**

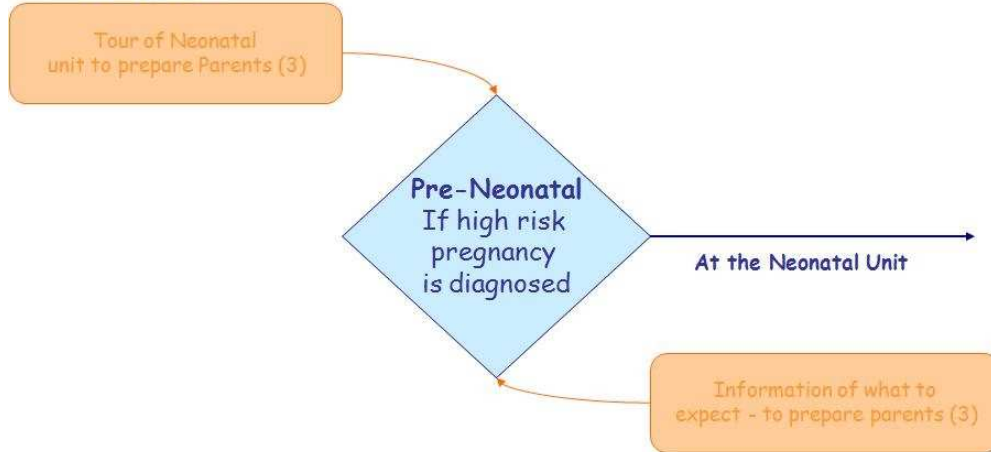

SIGN level of evidence used to grade evidence e.g. (3), or (1+) as described in SIGN table

240x182mm (96 x 96 DPI)

view only

Figure 4

## Scottish Intercollegiate Guideline Network (SIGN) Levels of Evidence

|     |                                                                                                                                                          |
|-----|----------------------------------------------------------------------------------------------------------------------------------------------------------|
| 1++ | High quality meta analysis, systematic reviews of RCTs, or RCTs with very low risk of bias                                                               |
| 1+  | Well conducted meta-analysis, systematic review of RCTs or RCTs with low risk of bias                                                                    |
| 1-  | Meta analyses, systematic reviews of RCTs, or RCTs with high risk of bias                                                                                |
| 2++ | High quality systematic reviews of case-control or cohort studies                                                                                        |
| 2+  | High quality case-control studies with a very low risk of confounding bias, or chance and a high probability that the relationship is causal             |
| 2-  | Well conducted case control or cohort studies with a low risk of confounding, bias, or chance and a moderate probability that the relationship is causal |
| 3   | Case control or cohort studies with high risk of confounding, bias, or chance and a significant risk that the relationship is not causal                 |
| 3   | Non-analytical studies, e.g. case series, case reports, qualitative                                                                                      |
| 4   | Expert opinion                                                                                                                                           |

173x186mm (96 x 96 DPI)

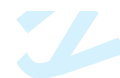



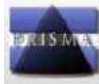

# PRISMA 2009 Checklist

| Section/topic                      | #  | Checklist item                                                                                                                                                                                                                                                                                              | Reported on page #           |
|------------------------------------|----|-------------------------------------------------------------------------------------------------------------------------------------------------------------------------------------------------------------------------------------------------------------------------------------------------------------|------------------------------|
| <b>TITLE</b>                       |    |                                                                                                                                                                                                                                                                                                             |                              |
| Title                              | 1  | Identify the report as a systematic review, meta-analysis, or both.                                                                                                                                                                                                                                         | 1                            |
| <b>ABSTRACT</b>                    |    |                                                                                                                                                                                                                                                                                                             |                              |
| Structured summary                 | 2  | Provide a structured summary including, as applicable: background; objectives; data sources; study eligibility criteria, participants, and interventions; study appraisal and synthesis methods; results; limitations; conclusions and implications of key findings; systematic review registration number. | 2,3,4,5                      |
| <b>INTRODUCTION</b>                |    |                                                                                                                                                                                                                                                                                                             |                              |
| Rationale                          | 3  | Describe the rationale for the review in the context of what is already known.                                                                                                                                                                                                                              | 6                            |
| Objectives                         | 4  | Provide an explicit statement of questions being addressed with reference to participants, interventions, comparisons, outcomes, and study design (PICOS).                                                                                                                                                  | 6                            |
| <b>METHODS</b>                     |    |                                                                                                                                                                                                                                                                                                             |                              |
| Protocol and registration          | 5  | Indicate if a review protocol exists, if and where it can be accessed (e.g., Web address), and, if available, provide registration information including registration number.                                                                                                                               | www.poppy-project.org.uk     |
| Eligibility criteria               | 6  | Specify study characteristics (e.g., PICOS, length of follow-up) and report characteristics (e.g., years considered, language, publication status) used as criteria for eligibility, giving rationale.                                                                                                      | 7                            |
| Information sources                | 7  | Describe all information sources (e.g., databases with dates of coverage, contact with study authors to identify additional studies) in the search and date last searched.                                                                                                                                  | 7                            |
| Search                             | 8  | Present full electronic search strategy for at least one database, including any limits used, such that it could be repeated.                                                                                                                                                                               | Appendix 1                   |
| Study selection                    | 9  | State the process for selecting studies (i.e., screening, eligibility, included in systematic review, and, if applicable, included in the meta-analysis).                                                                                                                                                   | 7                            |
| Data collection process            | 10 | Describe method of data extraction from reports (e.g., piloted forms, independently, in duplicate) and any processes for obtaining and confirming data from investigators.                                                                                                                                  | 7                            |
| Data items                         | 11 | List and define all variables for which data were sought (e.g., PICOS, funding sources) and any assumptions and simplifications made.                                                                                                                                                                       | 7                            |
| Risk of bias in individual studies | 12 | Describe methods used for assessing risk of bias of individual studies (including specification of whether this was done at the study or outcome level), and how this information is to be used in any data synthesis.                                                                                      | N/A Few quantitative studies |
| Summary measures                   | 13 | State the principal summary measures (e.g., risk ratio, difference in means).                                                                                                                                                                                                                               | N/A Few quantitative         |

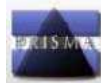

# PRISMA 2009 Checklist

|                      |    |                                                                                                                                                           |         |
|----------------------|----|-----------------------------------------------------------------------------------------------------------------------------------------------------------|---------|
|                      |    |                                                                                                                                                           | studies |
| Synthesis of results | 14 | Describe the methods of handling data and combining results of studies, if done, including measures of consistency (e.g., $I^2$ ) for each meta-analysis. | 7       |

Page 1 of 2

| Section/topic                 | #  | Checklist item                                                                                                                                                                                           | Reported on page #                      |
|-------------------------------|----|----------------------------------------------------------------------------------------------------------------------------------------------------------------------------------------------------------|-----------------------------------------|
| Risk of bias across studies   | 15 | Specify any assessment of risk of bias that may affect the cumulative evidence (e.g., publication bias, selective reporting within studies).                                                             |                                         |
| Additional analyses           | 16 | Describe methods of additional analyses (e.g., sensitivity or subgroup analyses, meta-regression), if done, indicating which were pre-specified.                                                         | Few quantitative studies                |
| <b>RESULTS</b>                |    |                                                                                                                                                                                                          |                                         |
| Study selection               | 17 | Give numbers of studies screened, assessed for eligibility, and included in the review, with reasons for exclusions at each stage, ideally with a flow diagram.                                          | 8                                       |
| Study characteristics         | 18 | For each study, present characteristics for which data were extracted (e.g., study size, PICOS, follow-up period) and provide the citations.                                                             | Table 1                                 |
| Risk of bias within studies   | 19 | Present data on risk of bias of each study and, if available, any outcome level assessment (see item 12).                                                                                                | Discussed in limitations                |
| Results of individual studies | 20 | For all outcomes considered (benefits or harms), present, for each study: (a) simple summary data for each intervention group (b) effect estimates and confidence intervals, ideally with a forest plot. | 18-31                                   |
| Synthesis of results          | 21 | Present results of each meta-analysis done, including confidence intervals and measures of consistency.                                                                                                  | N/A Non-quantitative analysis performed |
| Risk of bias across studies   | 22 | Present results of any assessment of risk of bias across studies (see Item 15).                                                                                                                          | N/A                                     |
| Additional analysis           | 23 | Give results of additional analyses, if done (e.g., sensitivity or subgroup analyses, meta-regression [see Item 16]).                                                                                    | N/A                                     |
| <b>DISCUSSION</b>             |    |                                                                                                                                                                                                          |                                         |
| Summary of evidence           | 24 | Summarize the main findings including the strength of evidence for each main outcome; consider their relevance to key groups (e.g., healthcare providers, users, and policy makers).                     | 30-32                                   |
| Limitations                   | 25 | Discuss limitations at study and outcome level (e.g., risk of bias), and at review-level (e.g., incomplete retrieval of identified research, reporting bias).                                            | 31                                      |

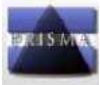

# PRISMA 2009 Checklist

|                |    |                                                                                                                                            |             |
|----------------|----|--------------------------------------------------------------------------------------------------------------------------------------------|-------------|
| Conclusions    | 26 | Provide a general interpretation of the results in the context of other evidence, and implications for future research.                    | 32          |
| <b>FUNDING</b> |    |                                                                                                                                            |             |
| Funding        | 27 | Describe sources of funding for the systematic review and other support (e.g., supply of data); role of funders for the systematic review. | Big Lottery |

From: Moher D, Liberati A, Tetzlaff J, Altman DG, The PRISMA Group (2009). Preferred Reporting Items for Systematic Reviews and Meta-Analyses: The PRISMA Statement. PLoS Med 6(6): e1000097. doi:10.1371/journal.pmed1000097

For more information, visit: [www.prisma-statement.org](http://www.prisma-statement.org).

Page 2 of 2

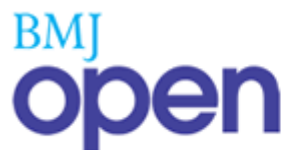

**A systematic mapping review of effective interventions for communicating with, supporting and providing information to parents of pre-term infants**

|                               |                                                                                                                                                                                                   |
|-------------------------------|---------------------------------------------------------------------------------------------------------------------------------------------------------------------------------------------------|
| Journal:                      | <i>BMJ Open</i>                                                                                                                                                                                   |
| Manuscript ID:                | BMJ Open-2010-000023.R2                                                                                                                                                                           |
| Article Type:                 | Research                                                                                                                                                                                          |
| Date Submitted by the Author: | 19-Apr-2011                                                                                                                                                                                       |
| Complete List of Authors:     | Brett, Jo; Warwick University<br>Staniszewska, Sophie<br>Newburn, Mary; Warwick University<br>Jones, Nicola; Warwickshire NCT Pre-term Support Group<br>Taylor, Lesley; National Childbirth Trust |
| <b>Subject Heading</b> :      | Paediatrics                                                                                                                                                                                       |
| Keywords:                     | NEONATOLOGY, Community child health < PAEDIATRICALS, Social Health                                                                                                                                |
|                               |                                                                                                                                                                                                   |

SCHOLARONE™  
Manuscripts

1  
2  
3  
4  
5  
6  
7  
8  
9  
10  
11  
12  
13  
14  
15  
16  
17  
18  
19  
20  
21  
22  
23  
24  
25  
26  
27  
28  
29  
30  
31  
32  
33  
34  
35  
36  
37  
38  
39  
40  
41  
42  
43  
44  
45  
46  
47  
48  
49  
50  
51  
52  
53  
54  
55  
56  
57  
58  
59  
60

# **A systematic mapping review of effective interventions for communicating with, supporting and providing information to parents of pre-term infants**

Jo Brett\*, Sophie Staniszewska,\* Mary Newburn,\*\* Nicola Jones,\*\*\* Lesley Taylor \*\*

\* Royal College of Nursing Research Institute,  
School of Health and Social Studies,  
University of Warwick, Coventry, CV4 7AL

Tel: 024761 50622

[J.Brett@warwick.ac.uk](mailto:J.Brett@warwick.ac.uk)

POPPY website: <http://www.poppy-project.org.uk/>

[Sophie.Staniszewska@warwick.ac.uk](mailto:Sophie.Staniszewska@warwick.ac.uk)

\*\* National Childbirth Trust

Alexandra House, Oldham Terrace, London  
W3 6NH

Tel: 0844 243 6000

[m\\_newburn@national-childbirth-trust.co.uk](mailto:m_newburn@national-childbirth-trust.co.uk)

[Lesley.taylor@automedialtd.co.uk](mailto:Lesley.taylor@automedialtd.co.uk)

\*\*\* Warwickshire NCT Pre-term Support Group

No fixed address

[nicola@scott-jones.net](mailto:nicola@scott-jones.net)

## Abstract

**Background and Objective:** The birth of a pre-term infant can be an overwhelming experience of guilt, fear, and helplessness for parents. Provision of interventions to support and engage parents in the care of their infant may improve outcomes for both the parents and the infant. The objective of this systematic review is to identify and map out effective interventions for communication with, supporting and providing information for parents of pre-term infants.

**Design:** Systematic searches were conducted in the electronic databases Medline, Embase, PsychINFO, the Cochrane library, CINHAL, MIDIRS, HMIC, and HELMIS. Hand-searching of reference lists and journals was conducted. Studies were included if they provided parent-reported outcomes of interventions relating to information, communication, and/or support for parents of pre-term infants prior to the birth, during care at the NICU, and after going home with their pre-term infant. Titles and abstracts were read for relevance and papers judged to meet inclusion criteria were included. Papers were data extracted, quality assessed and a narrative summary was conducted in line with the York Centre for Reviews and Dissemination guidelines.

**Studies reviewed:** 72 papers identified, 19 papers were randomised controlled trials, 16 were cohort or quasi-experimental studies, 37 were non-intervention studies.

1  
2  
3 **Results:** Interventions for supporting, communicating with, and providing  
4 information to parents that have had a premature infant are reported. Parents report  
5 feeling supported through individualised developmental and behavioural care  
6 programmes, through being taught behavioural assessment scales, and through  
7 breast feeding, kangaroo care and baby massage programmes. Parents also felt  
8 supported through organised support groups and through provision of an  
9 environment where parents can meet and support each other. Parental stress may  
10 be reduced through individual developmental care programmes, through  
11 psychotherapy, through interventions that teach emotional coping skills and active  
12 problem solving, and journal writing.  
13  
14  
15  
16  
17  
18  
19  
20  
21  
22  
23  
24  
25  
26  
27  
28

29 Evidence reports the importance of preparing parents for the neonatal unit through  
30 the neonatal tour, and the importance of good communication throughout the infant  
31 admission phase and after discharge home. Providing individual web-based  
32 information about the infant, recording doctor-patient consultations, and provision of  
33 an information binder may also improve communication with parents.  
34  
35  
36  
37  
38  
39  
40  
41  
42

43 The importance of thorough discharge planning throughout the infant's admission  
44 phase and the importance of home support programmes are also reported.  
45  
46  
47  
48  
49

50 **Conclusion:** The paper reports evidence of interventions that help support,  
51 communicate with and inform parents who have had a premature infant throughout  
52 the admission phase of the infant, discharge, and returning home. The level of  
53 evidence reported is mixed, and this should be taken into account when developing  
54 policy. A summary of interventions from the available evidence is reported.  
55  
56  
57  
58  
59  
60

**Article focus:**

A systematic mapping review to identify and synthesize evidence of effective interventions for communicating with, supporting and providing information for parents of pre-term infants.

**Key messages:**

- The review highlights the importance of encouraging and involving parents in the care of their pre-term infant at the neonatal unit to enhance their ability to cope with and improve their confidence in caring for the infant, which may also lead to improved infant outcomes and reduced length of stay at the neonatal unit.
- Interventions for supporting parents included: 1) involving parents in individualised developmental and behavioural care programmes (e.g. COPE, NIDCAP, MITP) and behavioural assessment programmes; 2) breastfeeding, kangaroo care and infant massage programmes; 3) support forums for parents; 4) interventions to alleviate parental stress; 5) preparation of parents for various stages, for example seeing their infant for the first time, preparing to go home; 6) home support programmes.
- Involving parents in the exchange of information with and between health professionals is important, with various modes of providing this information reported, for example ward rounds with doctors, discussion around infant notes, websites, and hard copy information.



## Strengths and limitations of study:

### Strengths

This is the first review to synthesize the evidence of interventions to support parents of pre-term infants through improved provision of information, improved communications between parents and health professionals and alleviation of stress at all stages of a parents journey through the neonatal unit. It highlights relatively inexpensive interventions that can be integrated into their pathway through the neonatal unit and going home, enhancing parental coping, and potentially improving infant outcomes and reducing the infants length of stay at the neonatal unit.

### Limitations

The quality of the evidence that this review reports is variable, and includes all types of study designs. It has been difficult to evaluate one piece of evidence over another because of the nature of the evidence. For example, whether RCTs are an appropriate method of evaluating the parents' experiences of interventions over and above, say, a qualitative study is debatable. While the RCT studies are more objective, they often fail to provide a more indepth empirical reality of parents' experiences of having a premature infant. A well conducted RCT may not provide a true reflection of improved self-esteem or empowerment, for example. Whereas a qualitative study, provides an understanding of the experiences. Furthermore, evaluation of such complex interventions is challenging because of the various interconnecting parts of the pathway reported in figure 2.

1  
2  
3  
4  
5  
6  
7  
8  
9  
10  
11  
12  
13  
14  
15  
16  
17  
18  
19  
20  
21  
22  
23  
24  
25  
26  
27  
28  
29  
30  
31  
32  
33  
34  
35  
36  
37  
38  
39  
40  
41  
42  
43  
44  
45  
46  
47  
48  
49  
50  
51  
52  
53  
54  
55  
56  
57  
58  
59  
60

It is therefore very difficult to evaluate the results to say that one study method is better than another. For this reason we have been inclusive in our selection of studies, resulting in a large number of studies selected for the review. Being inclusive of studies benefits the evidence base by bringing together 'experience' studies in a systematic way gaining a greater breadth of perspectives and a deeper understanding of issues from the point of view of those targeted by the interventions. However, if studies were fatally flawed they were excluded from the review.

## Introduction

While medical advances mean that very premature neonates have an increasingly better chance of survival, the impact of this experience on the child and their parents cannot be underestimated. The birth of a pre-term infant can be an intensely stressful, confusing and difficult time for parents and families<sup>(1)</sup>. Parents can have feelings of fear about their infant's condition or doubt in their ability to care for the child. Parents may also experience anger or grief, or they may blame themselves and experience intense guilt. Once mothers have returned home, hospital visits to see their baby can be difficult if coping with other siblings and travelling long distances to the neonatal unit<sup>(2)</sup>. It is therefore not surprising that mothers of pre-term babies experience significantly higher levels of post-natal depression than mothers of healthy full-term infants<sup>(3)</sup>. Fathers, who are often the main source of comfort and support for their wives, report feeling powerless to help, and often feel isolated from their infant as the health professionals focus on the infant and mother<sup>(4)</sup>.

Furthermore, while going home with their infant can be a time of joy and relief for these parents, bringing home a fragile infant and caring for them on your own for the first time can be a worrying time, causing additional stress for the parents.

Reducing parent stress and introducing interventions to improve parents confidence and ability to care for their premature infant at the neonatal unit and after

1  
2  
3  
4  
5  
6  
7  
8  
9  
10  
11  
12  
13  
14  
15  
16  
17  
18  
19  
20  
21  
22  
23  
24  
25  
26  
27  
28  
29  
30  
31  
32  
33  
34  
35  
36  
37  
38  
39  
40  
41  
42  
43  
44  
45  
46  
47  
48  
49  
50  
51  
52  
53  
54  
55  
56  
57  
58  
59  
60

returning home can improve outcomes for parents and their child, reduce the length of stay at the neonatal unit<sup>(5,6)</sup> and reduce the re-admittance to hospital<sup>(7)</sup>.

The Parents of Premature Babies (POPPY) study aims to develop a better understanding of the experiences of a range of parents with pre-term babies, particularly with regards to the communication, information and support they received on the NICU, ensuring that the perspectives of parents are at the heart of the study<sup>(8)</sup>. This paper reports the results of the first phase of the POPPY study, which takes the form of a systematic mapping review to identify effective interventions for communicating with, supporting and providing information for parents of pre-term babies.

## Methods

Systematic searches were undertaken for the period of January 1980 to October 2006 in the following databases: Medline, Embase, PsychINFO, the Cochrane library, CINHALL, MIDIRS, HMIC, and HELMIS (see table 1 for search strategy). A combination of text terms and MeSH terms were used to maximise the volume of literature retrieved. Grey literature was sought from specialists in the field, and the following journals were hand-searched from 1990 onwards for all relevant English language articles: Neonatal Network Journal, Journal of Neonatal Nursing and Journal of Obstetric, Gynecologic, and Neonatal Nursing. Update searches were undertaken in October 2009.

Studies were included if they met the inclusion criteria:

- Outcomes reported by parents who have had a premature infant (i.e.  $\leq 36$  weeks gestation).
- Provided parent-reported outcomes (i.e. outcomes were reported by the parent themselves, not reported by health professionals or others) of interventions relating to information provision at the neonatal unit and after discharge.
- Provided parent-reported outcomes of interventions relating to communication with health professionals at the neonatal unit and after discharge.
- Provided parent-reported outcomes of interventions relating to provision of support at the neonatal unit and after discharge.

- Design of study was: RCTs, Quasi experimental, cohort, case-control, cross-sectional, case series, case reports, or qualitative
- Studies were relevant to that of developed countries
- Passed quality assessment
- Published between January 1980 to October 2009
- English language

Studies were excluded in the met the exclusion criteria

- Reported parent-reported outcomes of parents who had a sick full-term infant at the neonatal unit.
- Outcomes were not reported by parents (e.g. evaluation of parent intervention by health professionals)
- Editorials or opinions
- Study was fatally flawed
- Not English Language
- Published before Jan 1980

It was felt that the systematic review should be inclusive of all study designs as it is often not feasible or appropriate to conduct randomised control trials (RCTs) or other intervention studies on the outcomes for parents that were measured. It was deemed therefore that, despite the potential bias inherent in descriptive studies, the results of these studies nonetheless gave an important insight into parent-related interventions and should be included in this review.

1  
2  
3 The data extraction form and quality assessment for inclusion criteria were based on  
4 the guideline from the NHS Centre for Reviews and Dissemination (NHS CRD)<sup>(9)</sup>  
5  
6 Initially, two reviewers extracted data (JB, SS) independently for 20% of papers and  
7  
8 disagreements were resolved by discussion with a third reviewer. There was a high  
9  
10 level of agreement between reviewers, so the remaining data was extracted by one  
11  
12 reviewer and checked by a second. Any disagreements were resolved by discussion  
13  
14 with a third reviewer. The quantitative studies covered a wide range of interventions  
15  
16 and different methods of assessment so it was not possible to carry out a meta-  
17  
18 analysis. A non-quantitative synthesis was conducted based on the extracted data.  
19  
20 In the summary figure (Figure 2), the included evidence was assessed using the  
21  
22 Scottish Intercollegiate Guidelines Assessment (SIGN)<sup>(10)</sup>.  
23  
24  
25  
26  
27  
28  
29  
30  
31

## 32 **Search Results**

### 33 **Figure 1: The results from the literature search.**

34  
35  
36  
37  
38  
39  
40  
41  
42  
43  
44  
45  
46  
47  
48  
49  
50  
51  
52  
53  
54  
55  
56  
57  
58  
59  
60  
Seventy two papers were included (four were deemed relevant in two of the sections). Papers were excluded for a number of reasons including the fact that no parent outcome was identified, the study was irrelevant to neonatal services offered in developed countries such as the UK (3), or the study was deemed to be fatally flawed (11)

Tables 2a to 2j report the data extraction by sections described below in the results section. Figure 2 below provides a summary of evidence for interventions at the neonatal unit and after discharge.

## Figure 2: Summary of evidence for interventions at the neonatal unit and after discharge

### Results

Interventions for supporting parents included: 1) individualised developmental and behavioural care programmes<sup>(4,11,12,13,14,15,16,17)</sup> (e.g. COPE, NIDCAP, MITP – see below); 2) behavioural assessment scales; 3) breastfeeding, kangaroo care and infant massage programmes; 4) support forums for parents; 5) the alleviation of parental stress; 6) preparing parents for seeing their infant for the first time; 7) communication and information sharing; 8) discharge planning; and 9) home support programmes.

#### 1) Supporting parents through individualised developmental and behavioural care programmes

### Figure 3: Individualised developmental and behavioural care programmes

Fourteen studies reported individualised developmental and behavioural care programmes, of which nine were RCTs. The RCT evidence (1++ & 1+) suggested that the involvement of parents in an individualised developmental and behavioural care programme significantly reduced the maternal stress created by the NICU environment and the demands of their infant<sup>(4,11,14,16,18,19)</sup>. This intervention also significantly improved the parental understanding of their infant and their interactions with their infant<sup>(4)</sup>.



1  
2  
3  
4  
5  
6 Recent RCT evidence suggested that the introduction of the NIDCAP intervention  
7  
8 had not significantly changed levels of parental stress, confidence or nursing  
9  
10 support. However, the outcomes were measured only 1-2 weeks after the baby was  
11  
12 born (Van der Pal 2007, 1+)<sup>(12)</sup>. The introduction of the NCATS programme in the  
13  
14 NICU made no significant difference to parental stress levels and maternal-infant  
15  
16 interactions when assessed at discharge and at three months after discharge  
17  
18 (Glazebrook et al. 2007, 1+)<sup>(20)</sup>. One RCT found that coaching parents on how to  
19  
20 interact with their pre-term infant made no difference to knowledge of care,  
21  
22 sensitivity to the infant or satisfaction in parenting compared with the control  
23  
24 group (Parker-Loewen 1987, 1-)<sup>(21)</sup>. However, this may have been confounded by the  
25  
26 amount of contact that the control mothers had with the researchers, as these  
27  
28 mothers reported that they enjoyed having someone show an interest in them.  
29  
30  
31  
32  
33  
34  
35

36 Evidence from a cohort reported that the Vermont Mother-Infant Transaction  
37  
38 Programme (MITP) significantly improved maternal satisfaction, maternal self-  
39  
40 confidence, and mothers' perception of their infant's temperament at six months<sup>(15)</sup>.  
41  
42 One cohort study reported that individualised developmental care programmes  
43  
44 appeared to make no difference to parents' perceptions of the neonatal unit or  
45  
46 satisfaction with care, despite significantly lowering stress cues in the pre-term  
47  
48 infants<sup>(22)</sup>.  
49  
50  
51  
52  
53  
54

55 Evidence from qualitative studies provides an insight into the benefits of  
56  
57 individualised developmental and behavioural care programmes at the neonatal  
58  
59 unit, such as empowering parents to take care of their infants, teaching parents  
60

1  
2  
3 behavioural cues of their infants, problem-solving, and learning how to interact with  
4 their infants, resulting in a greater satisfaction with the care provided<sup>(13,23,24)</sup>.

5  
6  
7  
8 Furthermore, parents reported a reduction in stress after such programmes and said  
9 that they felt more confident in caring for their infants, which promoted parental self-  
10 reliance when returning home<sup>(24)</sup>.

## 11 12 13 14 15 16 17 **2) Supporting parents through use of Behavioural Assessment Scales**

18  
19  
20  
21  
22 No RCT evidence was reported on this intervention. Three cross-sectional  
23 studies provided insights into how to teach parents assess and interpret the  
24 behaviour of their pre-term through using the Brazelton Behavioural Assessment  
25 scales. The studies reported this intervention may improve mother-infant bonding,  
26 reduce maternal anxiety, and help mothers foster a more realistic perception of their  
27 pre-term infants<sup>(25,26,27)</sup>.

## 28 29 30 31 32 33 34 35 36 37 38 **3) Supporting parents through breast feeding, kangaroo care and infant** 39 40 41 **massage**

42  
43  
44  
45  
46 Four studies reported on parent outcomes of interventions around breast-  
47 feeding, of which one was a RCT, six studies reported on parent outcomes of  
48 interventions around kangaroo care (skin to skin contact with baby out of the  
49 incubator), of which 2 were RCTs, and two studies reported parent outcomes  
50 around baby massage. An RCT (1-) reported no significant difference in the  
51 mother's confidence and competence in carrying out breast feeding by weighing the  
52 infant before and after feeds<sup>(28)</sup>.

1  
2  
3  
4  
5  
6 Three cross-sectional studies and one case series study reported on breast  
7  
8 feeding interventions. The studies reported that parents receiving breastfeeding  
9  
10 support at the neonatal unit were more likely to continue breastfeeding up to a  
11  
12 month after discharge than comparable groups. Breast-feeding education and  
13  
14 support at the neonatal unit in the form of counselling, information (handouts and  
15  
16 videos), practical help and group breast-feeding clinics improved the confidence of  
17  
18 mothers in breast-feeding. An individualised discharge plan for breast feeding  
19  
20 mothers with follow-up telephone calls or home visits appeared to maintain mothers'  
21  
22 confidence in breastfeeding, and provide reassurance<sup>(29,30,31)</sup>  
23  
24  
25  
26  
27  
28

29  
30 Six studies reported parent outcomes of using kangaroo care with their pre-  
31  
32 term infants, of which two were RCTs. The RCT evidence (1+) suggests that use of  
33  
34 kangaroo care significantly reduces maternal anxiety around her infant, gives the  
35  
36 mother a significantly greater sense of competence with their infant, and a  
37  
38 significantly greater sensitivity towards her infant<sup>(32)</sup>. Furthermore, RCT evidence (1+)  
39  
40 suggests that music during kangaroo care resulted in significantly lower maternal  
41  
42 anxiety<sup>(33)</sup>.  
43  
44  
45  
46  
47

48  
49 One cohort study, which assessed outcomes of mothers using kangaroo care  
50  
51 at 37 weeks, at 3 months, and at 6 months, reported significantly better levels of  
52  
53 mother-infant interaction, more touch, better adaptation to infant cues, and better  
54  
55 perception of their infant at all time periods. Mothers also reported significantly less  
56  
57 post-natal depression compared to the controls at 37 weeks<sup>(34)</sup>.  
58  
59  
60

1  
2  
3 One cross-sectional study reported that the majority of mothers preferred the  
4 kangaroo method, mainly because their baby was closer to them. Touch was  
5 important to mothers, as it induced feelings of well-being and fulfilment in parents<sup>(35)</sup>.  
6  
7  
8  
9

10  
11  
12 In the qualitative studies, parents described how kangaroo care helped them  
13 to get to know their infant, increased their confidence, and made them feel that their  
14 infant needed them<sup>(36)</sup>; parents reported that their mood was improved, that they  
15 perceived their infant differently and felt a stronger sense of identifying with their  
16 infant<sup>(37)</sup>.  
17  
18  
19  
20  
21  
22  
23  
24  
25

26 Two studies reported on parent outcomes of baby massage on pre-term  
27 infants, of which one was an RCT. RCT evidence (1+) reported that at three  
28 months, mothers of massaged infants felt significantly less intrusive towards caring  
29 for their baby, interactions were more reciprocal, and treated infants were more  
30 socially involved compared to controls<sup>(38)</sup>. One cross-sectional study also reported  
31 improved maternal-infant interactions<sup>(39)</sup>.  
32  
33  
34  
35  
36  
37  
38  
39  
40  
41  
42  
43  
44  
45

#### 46 **4) Support forums for parents**

47  
48  
49

50 No RCT evidence was reported for these interventions. Nine studies reported  
51 the benefits of participating in support groups set up within the NICU, either run by  
52 staff at the neonatal unit or by parents who have experienced having a pre-term  
53 infant themselves. Evidence from cohort studies reported that parent-led peer  
54 support groups at the NICU led to mothers in the intervention group having  
55  
56  
57  
58  
59  
60

1  
2  
3 significantly less stress at four weeks and 16 weeks after support was initiated at the  
4 neonatal unit<sup>(40,41)</sup>. Mothers of critically ill pre-term infants had significantly better  
5 maternal mood states, maternal-infant relationships, and home environments in the  
6 intervention group compared to the control group<sup>(42)</sup>  
7  
8  
9  
10  
11  
12  
13  
14  
15  
16

17 Evidence from a qualitative study gave insights into how a health professional  
18 led support group assisted parents to gain perspective, feel supported, and learn  
19 practical information about how to interact with their baby<sup>(43)</sup>. Qualitative evidence  
20 also reports that parent-to-parent support groups provided parents with information,  
21 emotional support, and strength<sup>(44)</sup>. Cross-sectional studies and case series studies  
22 reported on how health professional led support groups also helped to relieve  
23 anxiety, gave an opportunity to communicate with staff, and gain confidence in their  
24 parenting skills<sup>(45,46,47)</sup>. Another case series study reported how a support programme  
25 run by parents gave parents space to express their worries and concerns and  
26 provided comfort in talking to 'experienced' parents<sup>(48)</sup>.  
27  
28  
29  
30  
31  
32  
33  
34  
35  
36  
37  
38  
39  
40  
41  
42  
43  
44  
45

#### 46 **5) Alleviating parent stress**

47  
48 Seven studies report interventions that attempt to alleviate the adverse  
49 psycho-social consequences of having a pre-term infant, of which four were RCTs.  
50 RCT evidence (1+ - 1++) is reported in the individualised developmental behavioural  
51 programme section for the stress reduction benefits of COPE, NIDCAP, and  
52 MITP<sup>(4,11,14,16)</sup>. Other RCT evidence (1-) reports that the use of videotape in  
53  
54  
55  
56  
57  
58  
59  
60

1  
2  
3 strategies that focus on coping with emotions and active problem solving  
4  
5 significantly reduced maternal stress<sup>(49)</sup>.  
6  
7  
8  
9

10 Evidence from a cohort study reported that the use of one-off psychological  
11 interventions to teach relaxation and coping mechanisms to normalise their  
12 experience, as well as emotional and practical support significantly reduced the  
13 traumatic impact for parents compared to controls<sup>(50)</sup>. Two case series studies gave  
14 insights into the use of journal writing for documenting feelings, thoughts, milestones  
15 and involvement in care; the use of psychotherapy to offer support and insight at a  
16 time of crisis was also found to reduce stress<sup>(51,52)</sup>.  
17  
18  
19  
20  
21  
22  
23  
24  
25  
26  
27  
28

## 29 **6) Preparing parents for seeing their infant the neonatal unit for the first time**

30

31 Two studies reported evidence for different ways of preparing parents for  
32 seeing their pre-term infant for the first time, of which one was an RCT<sup>(53,54)</sup>. The RCT  
33 evidence (1+) reported that giving parents a photograph of their pre-term infant  
34 provides a positive effect by improving bonding with their infant<sup>(53)</sup>.  
35  
36  
37  
38  
39  
40  
41  
42

43 The qualitative study gave an insight into how a tour of the neonatal unit prior  
44 to having a pre-term infant (when a pregnancy at high risk of premature labour was  
45 diagnosed) may decrease parent's fears, inspire hope in their infant's prognosis,  
46 and give parents reassurance about the care offered at the NICU<sup>(54)</sup>. However, some  
47 parents found the appearance of the babies and the technology overwhelming, and  
48 some expressed concerns that the tour was not supported by staff on the neonatal  
49 unit.  
50  
51  
52  
53  
54  
55  
56  
57  
58  
59  
60

## 7) Interventions for communication and information sharing

Eight studies assessed interventions to improve the issues of communication at the neonatal unit, of which one was a RCT<sup>(55)</sup>. The RCT evidence (1+) reported that taping parent-doctor consultations improved the recall of parents of the consultation<sup>(55)</sup>. The trial found that mothers who received audiotapes of their consultation recalled significantly more information about the diagnosis, treatment, and outcome of their children than women in the control group at ten days and at four months.

Evidence from a cohort study reported that discussions between health professionals and parents around their infant's progress chart resulted in the intervention group having significantly fewer unrealistic concerns, less uncertainty about the medical condition of the infant, less conflict and a greater satisfaction with regards to shared decision-making<sup>(56)</sup>. Another cohort study reported that parents had significantly greater contact with the NICU during the infant's admission and reported a sense of relief at seeing their infant when they had access to the neonatal unit via a videophone<sup>(57)</sup>.

Qualitative evidence investigated the perception of parents regarding the methods of effective and ineffective communication at the NICU. Parents perceived that the most effective communication with nurses was through discourse management (nurses asking questions and encouraging parents to ask questions), caring and reassuring communication, and communication as equal partners in the care of the infant. Ineffective communication was perceived as when the information given was inconsistent, staff did not check if parents understood the

1  
2  
3 information, and if questions were not allowed<sup>(58)</sup>. Furthermore, qualitative evidence  
4 reported that 'chat' or 'social talk' between nurses and parents had a positive  
5  
6 influence on mothers' confidence, their sense of control, and their feeling of  
7  
8 connection with their baby<sup>(59)</sup>.  
9  
10  
11

12  
13  
14  
15 Cross-sectional studies provided an insight into the methods of improving  
16 communication between parents of pre-term infants and health professionals. The  
17 use of a web-based programme (BabyLink ) to provide individualised information to  
18 parents helped communicate complex issue, and parents reported that it helped to  
19 humanise the experience of the neonatal unit<sup>(60)</sup>. Furthermore, a study reported that  
20 the use of BabyLink improved the overall satisfaction of the family with care at the  
21 neonatal unit and actually reduced the length of stay at the neonatal unit<sup>(6)</sup>. Parents  
22 reported that they found the tape-recorded consultations with doctors helpful to  
23 process the information, as well as being comforting and supportive<sup>(61)</sup>.  
24  
25  
26  
27  
28  
29  
30  
31  
32  
33  
34  
35  
36  
37

38 Five studies reported evidence on the information needs of parents, none of  
39 which provided RCT level evidence. One pre-test/post-test study concluded that  
40 information and training for specific practical care of their infant on oxygen therapy  
41 could significantly improve the relevant knowledge of parents, and reduced their  
42 distress when entering the transition period of returning home<sup>(62)</sup>.  
43  
44  
45  
46  
47  
48  
49  
50  
51

52 Three qualitative studies described an information binder that provided  
53 relevant information about medical and practical issues relating to the NICU.  
54 Parents could add information to the folder. The information binder empowered  
55  
56  
57  
58  
59  
60 parents to take an active interest in acquiring relevant information about their infant



1  
2  
3 and improved parents understanding and ability to participate in decision-making.  
4  
5 Furthermore, the information binder increased parent's confidence in caring for their  
6  
7 infant, and gave them hope of progress for their infant<sup>(63, 64)</sup>. Prioritising information  
8  
9 through a "card sort" (cards which state information topics for parents who have had  
10  
11 a pre-term infant) was reported by a qualitative study as being a less intimidating  
12  
13 way for parents to access important and timely information <sup>(65)</sup>. This study reported  
14  
15 that parents' highest priorities were infant cardiopulmonary resuscitation (CPR),  
16  
17 infant illness and development; information with a moderate priority were feeding,  
18  
19 giving medication, and hygiene; and information topics that were given the lowest  
20  
21 priority included getting help at home and the use of car seats. One cross-sectional  
22  
23 study reported that the neonatal nurses were the best source of information at the  
24  
25 NICU<sup>(66)</sup>.  
26  
27  
28  
29  
30  
31  
32  
33

## 34 **8) Discharge planning**

35  
36  
37  
38 Six studies reported on discharge programmes, of which one reported RCT  
39  
40 level evidence<sup>(67)</sup>. RCT evidence (1-) suggests that a parent-infant discharge  
41  
42 programme within a therapeutic problem-solving model significantly improved parent  
43  
44 interactions with their infants, and parents were significantly more engaged with  
45  
46 their infants after returning home compared with the parents who did not go through  
47  
48 a discharge programme<sup>(67)</sup>.  
49  
50  
51  
52  
53  
54

55  
56 One cohort study assessed an early discharge programme with an  
57  
58 individualised care and discharge plan, followed by domiciliary nursing care, and  
59  
60 reported significantly less anxiety in mothers in the intervention group at

1  
2  
3 discharge<sup>(68)</sup>. No significant differences in the experiences of parents with regards to  
4 their infant's emotional well-being and breast feeding issues were reported. The  
5 levels of anxiety did not appear to be different between groups of parents who did  
6 not receive a formal discharge programme at one year after discharge from the  
7 neonatal unit<sup>(68)</sup>.  
8  
9  
10  
11  
12  
13  
14  
15  
16

17 The qualitative studies gave insights into how discharge planning provided  
18 support for parents. One study conducted a discharge programme that comprised of  
19 an educational programme during the period of hospitalisation for parents with pre-  
20 term infants, a visit and orientation about the neonatal unit by the family's health  
21 visitor, a multidisciplinary and cross-sector discharge conference, and the  
22 publication of relevant booklets for parents and health care providers<sup>(69)</sup>. The  
23 parents found that most of the intervention initiatives contributed to a feeling of  
24 overall increased support and met their needs, including improving their confidence  
25 in caring for their pre-term infant and ensuring the well-being of their child following  
26 discharge. Families valued the support and guidance they received from the co-  
27 ordinating health visitor, and valued having a named contact nurse throughout their  
28 stay at the neonatal unit and at home, which demonstrated the importance of  
29 continuity of care. All participants in this study felt secure when they returned home.  
30  
31  
32  
33  
34  
35  
36  
37  
38  
39  
40  
41  
42  
43  
44  
45  
46  
47  
48  
49

50 One qualitative study assessed the perceptions of parents of pre-term infants  
51 regarding an early discharge and home-care programme<sup>(70)</sup>. The study concluded  
52 that parents of children who were discharged early may feel more positive about  
53 coming home as early as possible from the hospital, as this may help parents to feel  
54 like a 'normal' family and not to have to share their infant with the nurses and other  
55  
56  
57  
58  
59  
60

1  
2  
3 health professionals on the neonatal unit. However, parents in this study  
4  
5 appreciated the 24 hour accessibility of the staff on the neonatal unit for support and  
6  
7 knowledge.  
8  
9

10  
11  
12 Two further qualitative studies reports a Care by Parent discharge  
13  
14 programme and describes how the mother can stay in the same room or in a room  
15  
16 close to her pre-term infant, assuming all of the aspects of care but with help at  
17  
18 hand if needed <sup>(71,72)</sup>. Mothers reported that it gave them the opportunity to test  
19  
20 reality and bridge the gap between hospital and home, so gaining confidence in  
21  
22 taking their infant home, and it helped mothers to feel like a proper family, and  
23  
24 promoted their “ownership” of the infant.  
25  
26  
27  
28  
29  
30

### 31 32 **9) Home support programmes**

33  
34 Ten studies reported the outcomes of parents who participated in home  
35  
36 intervention programmes, of which two were RCTs. RCT evidence (1-) reported that  
37  
38 home support programmes, where parents are visited and given emotional and  
39  
40 practical support regularly for the first year and for up to three years afterwards, lead  
41  
42 to significantly reduced parental stress levels, a greater positive effect on maternal  
43  
44 behaviour and greater interactions with their pre-term infant. However, the  
45  
46 intervention was not significantly associated with improved maternal coping<sup>(73)</sup>. RCT  
47  
48 evidence also reports that regular home support programmes that last for up to a  
49  
50 year made mothers significantly more responsive to their infant and meant that they  
51  
52 were able to provide more appropriate and varied stimulations for the infant<sup>(67)</sup>.  
53  
54  
55  
56  
57  
58  
59  
60

1  
2  
3 Evidence from a cohort study where parents were visited regularly and taught  
4 care-taking skills, games and exercises reported a significantly better home  
5 environment for the family. However, there was no difference found between the  
6 intervention group and the control group with regards to maternal coping<sup>(74)</sup>.  
7  
8

9  
10  
11  
12 Evidence from a cohort study also assessed the support and psychological impact  
13 of an Infants Apnea Evaluation Programme (IAEP) for infants on home monitors and  
14 reported that monitoring itself significantly reduced anxiety. The structured support  
15 programme was found to be supportive by parents<sup>(75)</sup>. A similar cohort study  
16 introduced a home counselling programme for parents who used home monitoring.  
17 Parents were significantly less stressed by the presence of the monitor and by false  
18 alarms, and reacted less aggressively to monitor alarms. Parents in the structured  
19 support programme used the monitor less, and mainly during sleeping periods<sup>(76)</sup>.  
20  
21

22 One cohort conducted an educational developmental programme at home twice  
23 monthly using a parent's voice tape, baby massage, and a passive range of motion  
24 and exercise. The programme resulted in a significant improvement in parent-infant  
25 interaction at six months and 12 months after discharge, as well as benefiting the  
26 infant<sup>(77)</sup>.  
27  
28  
29  
30  
31  
32  
33  
34  
35  
36  
37  
38  
39  
40  
41  
42

43  
44  
45 Evidence from a cohort study reported that a home healthcare programme  
46 and home visiting programme significantly improved the home environment of the  
47 intervention groups compared to the control groups at one month and 12 months<sup>(5)</sup>.  
48  
49 However, there were no significant differences between groups with regard to family  
50 experiences and parental satisfaction.  
51  
52  
53  
54  
55  
56  
57  
58  
59  
60

1  
2  
3  
4 Evidence from one cross-sectional study and two case series studies give  
5  
6 insights into the effect of home support programmes. Specific to the UK, the  
7  
8 community neonatal service (CNS) was valued positively in providing support and  
9  
10 continuity of care for parents who needed a high level of support (e.g. experiencing  
11  
12 depression and bonding struggles with their infant, infant sleeping issues and  
13  
14 feeding problems)<sup>(78)</sup>. One study assessed the impact of an intensive care co-  
15  
16 ordinator who provided home visits for providing teaching, guidance and support to  
17  
18 parents<sup>(79)</sup>. The study reported that the intensive care co-ordinator made families  
19  
20 feel comfortable, offering emotional and practical support, and taught parents the  
21  
22 necessary skills for parenting the pre-term infant. Another similar study assessed a  
23  
24 neonatal integrated home care programme where neonatal nurses taught specific  
25  
26 infant care needs and provided emotional support to parents. Parents reported that  
27  
28 the programme helped them to bring their pre-term infants home earlier, provided  
29  
30 nurse help, support, instruction and encouragement<sup>(80)</sup>.  
31  
32  
33  
34  
35  
36  
37  
38

## 39 Discussion

40  
41 The aim of this systematic review focused on identifying interventions that  
42  
43 were effective in supporting, informing and communicating with parents who have  
44  
45 had a pre-term infant. This study has identified a range of interventions that can  
46  
47 produce beneficial outcomes for parents in relation to communication, information  
48  
49 and support.  
50  
51  
52  
53  
54

55 RCT evidence reports that developmental and behavioural care  
56  
57 programmes such as COPE and MITP significantly reduce stress and  
58  
59 depression in mothers of premature infants, significantly increase mothers'  
60

1  
2  
3 knowledge of her infant's condition and care (COPE) and significantly  
4 improved mothers attitude and confidence in caring for their infant (MITP).  
5  
6 COPE and MITP performed better than other such programmes because they  
7  
8 were developed to improve both mother and infant outcomes, whereas other  
9  
10 developmental programmes focussed more on infant outcomes. Such  
11  
12 interactive learning programmes appear to be more successful at reducing  
13  
14 mother's stress and improving mother's knowledge than stand alone coaching  
15  
16 sessions for parents.  
17  
18  
19  
20  
21  
22  
23  
24

25 Other RCT evidence reported that skin to skin care and baby massage  
26 significantly improved the mother-infant interaction and increased the  
27 mother's sense of competence in handling their infant. These are inexpensive  
28 interventions that can be introduced relatively easily to most NICUs.  
29  
30 Perhaps more controversial RCT evidence reports that recording parent's  
31 consultations with their doctors significantly improved the parent's recall of  
32 diagnosis, treatment and outcomes of their infant. However, in our growing  
33 litigious society, doctors may be reluctant to do this.  
34  
35  
36  
37  
38  
39  
40  
41  
42  
43  
44  
45

46 Cohort evidence reports the benefits of several interventions including  
47 discussions around the infant progress chart, parent support groups at the  
48 neonatal unit and home support programmes once the infant has been  
49 discharged. The non-intervention studies further added to the review by bring  
50 a wider breadth of information around the beneficial experiences of  
51 developmental care programmes, educational interventions, preparation for  
52  
53  
54  
55  
56  
57  
58  
59  
60

1  
2  
3 visiting the neonatal unit, and interventions to reduce parent's stress, that  
4  
5 might not have been reported within an RCT design.  
6  
7  
8  
9

10  
11 Important messages have come through this research, which healthcare  
12  
13 professionals and neonatal units should consider. Some neonatal units may have  
14  
15 already utilised some of these interventions, but we would urge them to use the  
16  
17 results of this systematic review to re-evaluate current practice around parents of  
18  
19 premature infants and consider whether unit and professional practice requires  
20  
21 adaptation or change. Changing practice can be difficult and a number of key  
22  
23 elements are required, including evidence, an understanding of the context of care  
24  
25 and a way of facilitating this evidence into practice<sup>(81)</sup>. We also acknowledge that  
26  
27 part of the context is a complex range of workforce issues that limits what neonatal  
28  
29 units can achieve, despite their best efforts. The focus on developing patient-  
30  
31 centred care within the NHS in the UK also applies to neonatal units and should  
32  
33 include parent-focused care as an extension of this concept<sup>(82)</sup>.  
34  
35  
36  
37  
38  
39  
40

41  
42 Many of the interventions that have been identified in this study could be  
43  
44 described as being building blocks for a family-centred model of care in the UK  
45  
46 setting, which embraces the mother and father or significant others in the medical  
47  
48 care of their infant. Such interventions act through establishing key actions and  
49  
50 interventions that emphasise the importance of communicating with, supporting and  
51  
52 informing the family. Furthermore, our review demonstrated that such family-centred  
53  
54 interventions resulted in shorter stays at the neonatal units, less re-hospitalisation of  
55  
56 pre-term infants and better long-term outcome with regards to morbidity in this group  
57  
58 of infants<sup>(4)</sup>. This contributes to a strong argument that highlights the potential for  
59  
60

1  
2  
3 family-centred care to be made more cost-effective, more acceptable to parents,  
4  
5 and in some cases offer important clinical benefits.  
6  
7  
8  
9

10 The scope of this review was very broad, and the searches were  
11 therefore developed to be inclusive. This resulted in the search being  
12 sensitive, but not specific. Furthermore, this systematic review includes  
13 intervention studies and non-intervention studies. It is implicit that the non-  
14 interventional studies will bring bias to the evidence base. We have therefore  
15 stratified the summary of results into RCTs and non RCTs, with the non-RCTs  
16 being stratified further within observational designs by study design (ie.,  
17 cohort, case-control, cross-sectional, etc). It was important to include the non-  
18 interventional studies as much of the literature around parents' views and  
19 experiences does not lend itself to the RCT design. Being inclusive of studies  
20 benefits the evidence base by bringing together 'experience' studies in a  
21 systematic way gaining a greater breadth of perspectives and a deeper  
22 understanding of issues from the point of view of those targeted by the  
23 interventions.  
24  
25  
26  
27  
28  
29  
30  
31  
32  
33  
34  
35  
36  
37  
38  
39  
40  
41  
42

43 The Scottish intercollegiate group network (SIGN) grading system used in  
44 this review is intended to place greater weight on the quality of evidence, and to  
45 emphasise that the body of evidence should be considered as a whole, and not rely  
46 on a single study. It is also intended to allow more weight to be given to  
47 recommendations supported by the good quality observational studies where RCTs  
48 are not available for practical or ethical reasons, as shown in figure 4.  
49  
50  
51  
52  
53  
54  
55  
56  
57  
58  
59  
60



1  
2  
3 The majority of studies included in this review are from the USA, which may  
4 affect the generalisation of interventions in neonatal units today and the ability of  
5 such studies to be applied in a UK practice setting would need to be considered.  
6  
7 While this review identified a range of interventions that can help parents, certain  
8 groups were under-represented in the study samples, including amongst others  
9 minority ethnic groups, individuals from lower social classes and young parents.  
10  
11 Further good quality research within a UK setting, and research on under-  
12 represented groups of parents at the neonatal units is needed.  
13  
14  
15  
16  
17  
18  
19  
20  
21  
22  
23

24  
25 Despite the limitations of the evidence-base, this systematic review highlights  
26 interventions for providing improved support, information and communication to  
27 parents of a pre-term infant. These interventions are summarised in Figure 2.  
28  
29  
30  
31  
32  
33

34 **Figure 4: Scottish Intercollegiate Guideline Network (SIGN) Levels of**  
35 **Evidence**  
36  
37  
38  
39  
40  
41  
42  
43  
44  
45  
46  
47  
48  
49  
50  
51  
52  
53  
54  
55  
56  
57  
58  
59  
60

## Acknowledgements

The study was funded by the Big Lottery Fund, and the collaborating organisations included the Royal College of Nursing Institute, the National Childbirth Trust (NCT), the Warwickshire NCT Pre-term Support Group, and BLISS, the premature baby charity. The Parents of Premature Babies (POPPY) project was supported by an advisory group whose membership which consisted of the following people: Charlotte Bennett, Peter Beresford (Chair), Debbie Bick, Maggie Redshaw, Nicola Crichton, Phillipa Goodger, Gill Gyte, Merryl Harvey, Yana Richens, Claire Pimm. The searches for this review were conducted by Paul Miller, Senior Information Specialist, Royal College of Physicians.

### **Ethics Approval:**

Ethics approval was gained for the study through MREC, South East Ethics Research Unit (ref: 06/MRE 01/6)

**Funder:** This study was funded by the Big Lottery

**Guarantor:** The University of Warwick, Coventry, CV7 4AL is the guarantor of this study

### **WHAT IS ALREADY KNOWN ON THIS TOPIC**

It has long been recognised that family-centred care at the neonatal unit is beneficial not just for the parents of premature infants, but for the infants themselves. While the importance of family centred care is known, neonatal units are unsure which are the most effective family-centred care interventions to support, communicate with, and provide information to these parents

### WHAT THIS STUDY ADDS

The evidence from the systematic review provides a summary pathway of family-centred care interventions to assist in providing support, information and communication with parents of premature infants throughout their stay at the neonatal unit and after discharge home.

#### Copyright statement:

"the Corresponding Author (Jo Brett) has the right to grant on behalf of all authors and does grant on behalf of all authors, an exclusive licence (or non exclusive for government employees) on a worldwide basis to the BMJ Publishing Group Ltd to permit this article (if accepted) to be published in BMJ Open and any other BMJPGJL products and sublicences such use and exploit all subsidiary rights, as set out in our licence."

#### Contributors statement

JB made substantial contributions to the design, acquisition of data and analysis and interpretation of the data, and wrote the first draft of the paper. JB wrote the first amendments to the draft paper and the first draft of responses to the reviewers

SS was the principal investigator of the POPPY study, obtaining funding for the study, made substantial contributions to the conception and design of the study, assisting in the selection of papers and the quality assessment of papers, assisted with the interpretation of the data, assisted in the writing of the first draft of the paper, and approved the version for publication

MN was the fund holder, made substantial contributions to the conception and design of the study, assisted in the interpretation of the data, revised drafts of the paper, and approved the version for publication

NJ was the patient representative on this study, made substantial contributions to the conception and design of the study, assisted in the interpretation of the data, revised drafts of the paper, and approved the version for publication

LT was a representative of the National Childbirth Trust and a patient representative. She made substantial contributions to the conception and design of the study, assisted in the interpretation of the data, revised drafts of the paper, and approved the version for publication.

#### Funding statement

The work was supported by the Big Lottery, grant number: RG/1/01014958

## References

1. Lau R, Morse C. Experiences of parents with premature infants hospitalised in neonatal intensive care units: a literature review. *Journal of Neonatal Nursing* 1998; 4: 23-9.
2. Stjernqvist K. Extremely low birthweight infants. Development, behaviour and impact on the family. Academic dissertation, Department of Applied Psychology, Paediatrics and Child and Youth Psychiatry, University of Lund, Sweden 1992
3. Veddovi M, Kerry DI, Gibson F, Bowen J, Stante D. The relationship between depressive symptoms following premature birth, mothers' coping style, and knowledge of infant development. *Journal of Reproductive and Infant Psychology* 2001, 19 (4): 313-323.
4. Singh D, Newburn M. *Becoming a father – Mens' access to information and support about pregnancy, birth and life with a new baby*. London 2000: The National Childbirth Trust
5. Melnyk BM, Feinstein NF, Alpert-Gillis L, Fairbanks E, Crean HF, Sinkin RA, Stone PW, Small L, Tu X, Gross SJ. Reducing premature infants' length of stay and improving parents' mental health outcomes with the Creating Opportunities for Parent Empowerment (COPE) neonatal intensive care unit program: a randomized, controlled trial. *Pediatrics* 2006 Nov;118(5):e1414-27
6. Finello KM, Litton KM, de Lemos R, Chan LS. Very low birth weight infants and their families during the first year of life: comparisons of medical outcomes based on after care services. *Journal of Perinatology* 1998;18:365-71.
7. Gray JE, Safron RB, Davis G, Pompilio-Weitzner JE, Zaccagnini L, Pursley D. Baby care link: Using the internet and telemedicine to improve care for high risk infants in pediatrics 2000; 106:1318-1324
8. Harrison H. The Principles for family centred neonatal care. *Pediatrics* 1993 Nov; 92 (5)
9. Systematic reviews: CRD's guidance for undertaking reviews in health care, NHS Centre for Reviews and Dissemination, University of York, 2008, <http://www.york.ac.uk/inst/crd/publications.htm>
10. Scottish Intercollegiate Guidelines Network (SIGN). *Sign 50: A Guideline Developer's handbook*, Jan 2008.
11. Als H, Gilkerson L, Duffy FH, McAnulty GB, Buehler DM, VandenBerg K et al. A three-center, randomized, controlled trial of individualized developmental care for very low birth weight preterm infants: Medical, neurodevelopmental, parenting, and caregiving effects. *Journal of Developmental and Behavioral Pediatrics* 2003;24:399-408.
12. Van der Pal S, Macguire C, Cessie S, Wit J, Waither F, Brull J. Parental experiences during the first phase at the neonatal intensive care unit after two developmental care interventions. *Acta Paediatrica* 2007; 96,1611-1616

13. Wielenga J, Smit B, Unk L. How satisfied are parents supported by nurses with the NIDCAP model of care for their preterm infant? *Journal of Nursing Care Quality* 2006; 21(1):41-48.
14. Kaaresen P I, Rønning J A, Ulvund S E, Dahl L B. A randomized, controlled trial of the effectiveness of an early-intervention program in reducing parenting stress after preterm birth. *Pediatrics* 2006;118(1):e9-19.
15. Rauh VA, Nurcombe B, Achenbach T, Howell C. The Mother-Infant Transaction Program. The content and implications of an intervention for the mothers of low-birthweight infants. *Clinics in Perinatology* 1990;17:31-45.
16. Nurcombe B, Howell DC, Rauh VA, Teti DM, Ruoff P, Brennan J. An intervention program for mothers of low-birthweight infants: preliminary results. *Journal of the American Academy of Child Psychiatry* 1984;23:319-25.
17. Sumner G, Spietz A. NCATS Caregiver/Parent-Child interaction teaching manual. Seattle, WA: NCATS Publications, University of Washington, School of Nursing 1994.
18. Browne JV, Talmi A. Family-based intervention to enhance infant-parent relationships in the neonatal intensive care unit. *Journal of Pediatric Psychology* 2005;30:667-77.
19. Meyer E, Coll C, Seifer R, Ramos A, et al. Psychological distress in mothers of preterm infants. *Journal of Developmental & Behavioral Pediatrics* 1995;16:412-7.
20. Glazebrook C, Marlow N, Israel C, Croudace T, Johnson S, White I et al. Randomised trial of a parenting intervention during neonatal intensive care. *Archives of Disease in Childhood-Fetal and Neonatal Edition* 2007; 1-16
21. Parker-Loewen DL. Effects of short-term interaction coaching with mothers of preterm infants. *Infant Mental Health Journal* 1987; 8:277-87.
22. Byers JF, Lowman LB, Francis J, Kaigle L, Lutz NH, Waddell T et al. A quasi-experimental trial on individualized, developmentally supportive family-centered care. *JOGNN - Journal of Obstetric, Gynecologic, & Neonatal Nursing* 2006; 35:105-15.
23. Lawhon G. Facilitation of parenting the premature infant within the newborn intensive care unit. *Journal of Perinatal and Neonatal Nursing* 2002;16:71-82.
24. Prentice M, Stainton MC. The effects of developmental care of preterm infants on women's health and family life. *Neonatal, Paediatric & Child Health Nursing* 2004;7:4-12.
25. Hawthorne J. Using the Neonatal Behavioural Assessment Scale to support parent-infant relationships. *Infant* 2005;1:213-8.
26. Culp RE, Culp AM, Harmon RJ. A tool for educating parents about their premature infants. *Birth* 1989;16:23-6.

- 1  
2  
3  
4  
5  
6  
7  
8  
9  
10  
11  
12  
13  
14  
15  
16  
17  
18  
19  
20  
21  
22  
23  
24  
25  
26  
27  
28  
29  
30  
31  
32  
33  
34  
35  
36  
37  
38  
39  
40  
41  
42  
43  
44  
45  
46  
47  
48  
49  
50  
51  
52  
53  
54  
55  
56  
57  
58  
59  
60
27. Szajenberg N, Ward MJ, Krauss A, Kessler DB. Low birth-weight prematures: preventive intervention and maternal attitude. *Child Psychiatry & Human Development* 1987;17:152-65.
  28. Hall WA, Shearer K, Mogan J, Berkowitz J. Weighing preterm infants before & after breastfeeding: does it increase maternal confidence and competence? *MCN, American Journal of Maternal Child Nursing* 2002;27:318-26.
  29. Meier PP, Engstrom JL, Mangurten HH, Estrada E, Zimmerman B, Kopparthi R. Breastfeeding support services in the neonatal intensive-care unit. *JOGNN - Journal of Obstetric, Gynecologic, & Neonatal Nursing* 1993;22:338-47.
  30. White JC, Smith MM, Lowman DK, Reidy TG, Murphy SM, Lane SJ. Parent support of feeding in the neonatal intensive care unit: perspectives of parents and occupational therapists. *Physical and Occupational Therapy in Pediatrics* 2000;19:111-26.
  31. Elliott S, Reimer C. Postdischarge telephone follow-up program for breastfeeding preterm infants discharged from a special care nursery. *Neonatal Network - Journal of Neonatal Nursing* 1998;17:41-5.
  32. Tessier R, Cristo M, Velez S, Giron M, de Calume ZF, Ruiz-Palaez JG et al. Kangaroo mother care and the bonding hypothesis. *Pediatrics* 1998;102:e17.
  33. Lai HL, Chen CJ, Peng TC, Chang FM, Hsieh ML, Huang HY et al. Randomized controlled trial of music during kangaroo care on maternal state anxiety and preterm infants' responses. *International Journal of Nursing Studies* 2006;43:139-46.
  34. Feldman R, Eidelman AI, Sirota L, Weller A. Comparison of skin-to-skin (kangaroo) and traditional care: parenting outcomes and preterm infant development. *Pediatrics* 2002;110:16-26.
  35. Legault M, Goulet C. Comparison of kangaroo and traditional methods of removing preterm infants from incubators. *JOGNN - Journal of Obstetric, Gynecologic, & Neonatal Nursing* 1995;24:501-6.
  36. Affonso D, Bosque E, Wahlberg V, Brady JP. Reconciliation and healing for mothers through skin-to-skin contact provided in an American tertiary level intensive care nursery. *Neonatal Network: The Journal of Neonatal Nursing* 1993;12:25-32.
  37. Gale G, Franck L, Lund C. Skin-to-skin (kangaroo) holding of the intubated premature infant. *Neonatal Network - Journal of Neonatal Nursing* 1993;12:49-57.
  38. Ferber SG, Ruth Feldman, David Kohelet, Jacob Kuint, Shaul Dollberg, Eliana Arbel and Aron Weller. Massage therapy facilitates mother–infant interaction in premature infants [Infant Behavior and Development](#) 2005; **28 (1)**: 74-81.

- 1  
2  
3  
4  
5  
6  
7  
8  
9  
10  
11  
12  
13  
14  
15  
16  
17  
18  
19  
20  
21  
22  
23  
24  
25  
26  
27  
28  
29  
30  
31  
32  
33  
34  
35  
36  
37  
38  
39  
40  
41  
42  
43  
44  
45  
46  
47  
48  
49  
50  
51  
52  
53  
54  
55  
56  
57  
58  
59  
60
39. Remedios CM. Evaluation of massage programme for premature infants. *Physiotherapy Singapore* 2005; 8:4-7.
  40. Roman R. *Research in nursing and health* 1995;18 (5): 385-394
  41. Preyde M, Ardal F. Effectiveness of a parent "buddy" program for mothers of very preterm infants in a neonatal intensive care unit. *CMAJ Canadian Medical Association Journal* 2003;168:969-73.
  42. Lindsay JK, Roman L, DeWys M, Eager M, Levick J, Quinn M. Creative caring in the NICU: parent-to-parent support. *Neonatal Network - Journal of Neonatal Nursing* 1993;12:37-44.
  43. Pearson J, Andersen K. Evaluation of a program to promote positive parenting in the neonatal intensive care unit. *Neonatal Network - Journal of Neonatal Nursing* 2001;20:43-8.
  44. Buarque V, de Carvaiho Lima M, Parry Scott R, Vasconcelos M, The influence of support groups on the family of risk newborns and on neonatal unit workers. *Journal de pediatria* 2006; 82 (4): 295-301
  45. Hurst I. One size does not fit all: Parents evaluation of a support program in the neonatal intensive care nursery. *Journal of Perinatal and Neonatal Nursing* 2006; 20(3): 252-261
  46. Bracht M, Ardal F, Bot A, Cheng CM. Initiation and maintenance of a hospital-based parent group for parents of premature infants: key factors for success. *Neonatal Network - Journal of Neonatal Nursing* 1998;17:33-7.
  47. Dammers J, Harpin V. Parents' meetings in two neonatal units: a way of increasing support for parents. *British Medical Journal Clinical Research Ed.* 1982;285:863-5.
  48. Jarrett MH. Family matters. Parent partners: a parent-to-parent support program in the NICU part II: program implementation. *Pediatric Nursing* 1996;22:142-4.
  49. Cobiella CW, Mabe PA, Forehand RL. A comparison of two stress-reduction treatments for mothers of neonates hospitalized in a neonatal intensive care unit. *Children's Health Care* 1990;19:93-100.
  50. Jotzo M, Poets CF. Helping parents cope with the trauma of premature birth: an evaluation of a trauma-preventive psychological intervention. *Pediatrics* 2005;115:915-9.
  51. Macnab AJ, Beckett LY, Park CC, Sheckter L. Journal writing as a social support strategy for parents of premature infants: a pilot study. *Patient Education & Counseling* 1998;33:149-59.

- 1  
2  
3  
4  
5  
6  
7  
8  
9  
10  
11  
12  
13  
14  
15  
16  
17  
18  
19  
20  
21  
22  
23  
24  
25  
26  
27  
28  
29  
30  
31  
32  
33  
34  
35  
36  
37  
38  
39  
40  
41  
42  
43  
44  
45  
46  
47  
48  
49  
50  
51  
52  
53  
54  
55  
56  
57  
58  
59  
60
52. Zeanah CH, Canger CI, Jones JD. Clinical approaches to traumatized parents: psychotherapy in the intensive-care nursery. *Child Psychiatry & Human Development* 1984;14:158-69.
  53. Huckabay LM. The effect on bonding behavior of giving a mother her premature baby's picture. *Scholarly Inquiry for Nursing Practice* 1999;13:349-62.
  54. Griffin T, Kavanaugh K, Soto CF, White M. Parental evaluation of a tour of the neonatal intensive care unit during a high-risk pregnancy. *JOGNN - Journal of Obstetric, Gynecologic, & Neonatal Nursing* 1997;26:59-65.
  55. Koh T, Butow P, Coorey M, Budge D, Collie L, Whitehall J, Tattersal M. Provision of taped conversations with neonatologists to mothers of babies in intensive care: randomised controlled trial. *BMJ* 2007;334:28.
  56. Penticuff JH, Arheart KL. Effectiveness of an intervention to improve parent-professional collaboration in neonatal intensive care. *Journal of Perinatal & Neonatal Nursing* 2005;19:187-202.
  57. Piecuch RE, Roth RS, Clyman RI, Sniderman SH, Riedel PA, Ballard RA. Videophone use improves maternal interest in transported infants. *Critical Care Medicine* 1983;11:655-6.
  58. Jones L, Woodhouse D, Rowe J. Effective nurse-parent communications: A study of parents perceptions in the NICU environment. *Patient Education and Counseling* 2007;69:206-212.
  59. Fenwick J, Barclay L, Schmied V. "Chatting". An important tool for facilitating mothering in the neonatal nursery. *Journal of Advanced Nursing* 2001; 33(5): 583-593.
  60. Freer Y, Lyon A, Stenson B, Coyle C. BabyLink – improving communication among clinicians and with parents with babies in intensive care *British Journal of Healthcare Computing and Information Management*. 2005, 22(2): 34-36
  61. Koh TH, Jarvis C. Promoting effective communication in neonatal intensive care units by audiotaping doctor-parent conversations. *International Journal of Clinical Practice* 1998;52:27-9.
  62. Brown KA, Sauve RS. Evaluation of a caregiver education program: home oxygen therapy for infants. *JOGNN: Journal of Obstetric, Gynecologic, and Neonatal Nursing* 1994;23:429-35.
  63. Costello A, Bracht M, Van Camp K, Carman L. Parent information binder: individualizing education for parents of preterm infants. *Neonatal Network - Journal of Neonatal Nursing* 1996;15:43-6.
  64. Gannon BA. Caring one day at a time. *Neonatal Network: The Journal of Neonatal Nursing* 2000;19:25-32.



- 1  
2  
3  
4  
5  
6  
7 65. Drake E. Discharge teaching needs of parents in the NICU. *Neonatal Network - Journal of Neonatal Nursing* 1995;14:49-53.
- 8  
9  
10 66. Kowalski W, Leef K, Mackley L, Spear M, Locke R. Communicating with parents of  
11 premature infants: How is the informant. *Journal of perinatology* 2006; 26:44-48.
- 12  
13  
14  
15 67. Barrera ME, Rosenbaum PL, Cunningham CE. Early home intervention with low-birth-  
16 weight infants and their parents. *Child Development* 1986;57:20-33.
- 17  
18 68. Ortenstrand A, Winbladh B, Nordstrom G, Waldenstrom U. Early discharge of preterm  
19 infants followed by domiciliary nursing care: parents' anxiety, assessment of infant  
20 health and breastfeeding.[see comment]. *Acta Paediatrica* 2001;90:1190-5.
- 21  
22  
23  
24 69. Broedsgaard A, Wagner L. How to facilitate parents and their premature infant for the  
25 transition home. *International Nursing Review* 2005;52:196-203.
- 26  
27 70. Jonsson L, Fridlund B. Parents' conceptions of participating in a home care programme  
28 from NICU: a qualitative analysis. *Vard I Norden* 2003 ;23:35-9.
- 29  
30  
31  
32 71. Costello A, Chapman J. Mothers' perceptions of the care-by-parent program prior to  
33 hospital discharge of their preterm infants. *Neonatal Network - Journal of Neonatal  
34 Nursing* 1998;17:37-42.
- 35  
36 72. Bennett R, Sheridan C. Mothers' perceptions of 'rooming-in' on a neonatal intensive  
37 care unit. *Infant* 2005;1:171-4.
- 38  
39  
40  
41 73. Spiker D, Ferguson J, Brooks G. Enhancing maternal interactive behavior and child  
42 social competence in low birth weight, premature infants. *Child development*  
43 1993;64:754-68.
- 44  
45 74. Ross GS. Home intervention for premature infants of low-income families. *American  
46 Journal of Orthopsychiatry* 1984;54:263-70.
- 47  
48  
49  
50 75. Leonard BJ, Scott SA, Sootsman J. A home-monitoring program for parents of  
51 premature infants: a comparative study of the psychological effects. *Journal of  
52 Developmental & Behavioral Pediatrics* 1989;10:92-7.
- 53  
54 76. Kurz H, Neunteufl R, Eichler F, Urschitz M, Tiefenthaler M. Does professional  
55 counseling improve infant home monitoring? Evaluation of an intensive instruction  
56 program for families using home monitoring on their babies. *Wiener Klinische  
57 Wochenschrift* 2002; 114:801-6.
- 58  
59  
60

- 1  
2  
3  
4  
5  
6  
7  
8  
9  
10  
11  
12  
13  
14  
15  
16  
17  
18  
19  
20  
21  
22  
23  
24  
25  
26  
27  
28  
29  
30  
31  
32  
33  
34  
35  
36  
37  
38  
39  
40  
41  
42  
43  
44  
45  
46  
47  
48  
49  
50  
51  
52  
53  
54  
55  
56  
57  
58  
59  
60
77. Resnick MB, Armstrong S, Carter RL. Developmental intervention program for high-risk premature infants: effects on development and parent-infant interactions. *Journal of Developmental & Behavioral Pediatrics* 1988;9:73-8.
78. Langley D, Hollis S, MacGregor D. Parents' perceptions of neonatal services within the community: a postal survey. *Journal of Neonatal Nursing* 1999;5:7-11.
79. Isaacs PC. Teaching parents with high-risk infants in the home. *Patient Counselling & Health Education* 1980;2:84-6.
80. Swanson SC, Naber MM. Neonatal integrated home care: nursing without walls. *Neonatal Network - Journal of Neonatal Nursing* 1997;16:33-8.
81. Rycroft-Malone J, Seers K, Titchen A, Harvey G, Kitson A, McCormack B. What counts as evidence in evidence-based practice? *Journal of Advanced Nursing* 2004; 47(1): 81-90
82. Staniszewska S, West Meeting the patient partnership agenda: the challenge for health care workers. *International Journal for Quality in Health Care* 2004; 16 (1): 3-5

1  
2  
3  
4  
5  
6  
7  
8  
9  
10  
11  
12  
13  
14  
15  
16  
17  
18  
19  
20  
21  
22  
23  
24  
25  
26  
27  
28  
29  
30  
31  
32  
33  
34  
35  
36  
37  
38  
39  
40  
41  
42  
43  
44  
45  
46  
47

Table 2: Data extraction tables

2a) Supporting parents through individualised developmental and behavioural care programmes

| Author (Year) Country        | Study design | Intervention                                                                                                                                                                                                                                                                                           | Outcome measure                                                                           | No of cases | No. of controls       | Statistically significant                                                                                                                                                                                                                                                                                                                               | Quality (SIGN) |
|------------------------------|--------------|--------------------------------------------------------------------------------------------------------------------------------------------------------------------------------------------------------------------------------------------------------------------------------------------------------|-------------------------------------------------------------------------------------------|-------------|-----------------------|---------------------------------------------------------------------------------------------------------------------------------------------------------------------------------------------------------------------------------------------------------------------------------------------------------------------------------------------------------|----------------|
| Van der Pal 2007 Netherlands | RCT          | NIDCAP                                                                                                                                                                                                                                                                                                 | PSI<br>Parents of Mother and Baby Scale<br>Nurse Parent Support Tool                      | 94          | 84                    | No significant differences were reported in Parental Stress Index, Confidence of parents, or perceived nursing support at 1 to 2 weeks after birth                                                                                                                                                                                                      | 1+             |
| Glazebrook et al 2007 UK     | RCT          | Nursing Child Assessment Teaching Scale (NCATS) at neonatal unit, with optional follow-up                                                                                                                                                                                                              | Parental Stress Index (PSI)<br>Home Observation for Measurement of the Environment (HOME) | 99          | 111                   | No significant differences reported at discharge or at 3 months after discharge.                                                                                                                                                                                                                                                                        | 1+             |
| Kaarsen 2006                 | RCT          | Mother-Infant Transaction Program<br>The intervention consisted of 8 sessions shortly before discharge and 4 home visits by specially trained nurses focusing on the infant’s unique characteristics, temperament, and developmental potential and the interaction between the infant and the parents. | PSI                                                                                       | 71          | 69 preterm<br>75 term | Early-intervention program reduces parenting stress in both mothers and fathers during the first year after a preterm birth to a level comparable to their term peers<br><br>Mothers 6 mths - total stress: 16.9 (5.2 to 28.5) .005<br>Mothers 12mths – total stress: 13.7 (1.6 to 25.9) .03<br>Fathers 12 moths – total stress: 14.8 (2.1 to 27.6) .02 | 1+             |
| Byers 2006 USA               | Cohort       | Family-centred care/developmental supportive care                                                                                                                                                                                                                                                      | Questionnaire developed for study to measure parents perceptions and satisfaction.        | 57          | 57                    | No differences in parent perception or satisfaction with the neonatal unit                                                                                                                                                                                                                                                                              | 2-             |

|                 |        |                                                                                                                                                                                                          |                                                                                                                                             |                    |    |                                                                                                                                                                                                                                                                                                                                                                                  |     |
|-----------------|--------|----------------------------------------------------------------------------------------------------------------------------------------------------------------------------------------------------------|---------------------------------------------------------------------------------------------------------------------------------------------|--------------------|----|----------------------------------------------------------------------------------------------------------------------------------------------------------------------------------------------------------------------------------------------------------------------------------------------------------------------------------------------------------------------------------|-----|
|                 |        |                                                                                                                                                                                                          | Study mainly reports baby outcomes                                                                                                          |                    |    |                                                                                                                                                                                                                                                                                                                                                                                  |     |
| Browne 2005 USA | RCT    | Family based intervention (Gp1: demonstration of pre-term baby behavioural cues; Gp2: viewed educational video and books about pre-term babies)                                                          | Nursing Child Assessment Scale (NCAFS) and Knowledge of Preterm Infant Behavior Scale (KPIB)                                                | Gp1: 28<br>Gp2: 31 | 25 | Intervention group reported significantly greater sensitive interactions with pre-term babies, and significantly greater knowledge of pre-term babies than controls at 1 month after discharge<br><br>(NCAFS 45.65, 6.20 vs. 47.43, 7.36 vs. 48.88, 7.41, $p < 0.05$ ; mean KPIB 23.32, SD 5.88 in group 1 vs. 25.90, 5.30, in group 2 vs. 19.58, 5.01 in group 3, $p < 0.001$ ) | 1+  |
| Als 2003 USA    | RCT    | NIDCAP (Neonatal individualised Developmental Care and Assessment Programme)                                                                                                                             | PSI (Parental Stress Index)                                                                                                                 | 38                 | 38 | Mothers in the intervention group reported significantly more favourable scores than the control group.<br><br>Hospital 1: I= 35.7 (sd 21.3)<br>C=44.9 (sd34.2)<br>Hospital 2: I=55.8 (sd28.8)<br>C=65.2 (sd27.5)<br>Hospital 3: I=49.0 (sd28.6)<br>C=55.9 (sd22.5)<br>Group score $\bar{X}$ = .41, $p < .001$<br>Summary: MANOVA: $F=2.41$ , $df=5.66$ , $p < 0.05$             | 1++ |
| Meyer 1994 USA  | RCT    | Family based intervention (Psychological intervention for family, teaching care and behavioural cues of baby, home discharge plan)                                                                       | Parental Stressor scale (PSS)<br>Maternal self esteem<br>Inventory,<br>Beck<br>Depression<br>Scale (BDS),<br>Family<br>Environment<br>Scale | 34                 | 34 | Intervention group reported significantly less stress (PSS) and reported significantly less depression (BDS) at discharge.<br><br>BDI: Int: 11% vs. 44%, $p < 0.05$ ; 39% vs 31% NS.<br>PSS: Int: $2.4 \pm 1.0$ ; $2.0 \pm 0.8$ vs Con $2.4 \pm 0.9$ ; $2.6 \pm 0.8$<br>$p < 0.05$<br><br>No other significant results were reported.                                            | 1+  |
| Rauh 1990 USA   | Cohort | Vermont Mother-Infant Transaction Programme (teach parents to appreciate infants unique characteristics. teach behavioural cues, teach parents to respond to infant, enhance mothers enjoyment of baby). | Maternal Role Satisfaction<br>questionnaire<br>Self-<br>Confidence<br>rating                                                                | 40                 | 41 | At 6 months: significantly better intervention effects for maternal role satisfaction, self-confidence and perception of infant temperament in intervention group; no difference on maternal attitudes to child-rearing. Data not given in paper.                                                                                                                                | 2-  |

|                           |     |                                                                                 |                                                                                                                                   |    |    |                                                                                                                                                                                                                                                                                                                                                                                                                                                              |    |
|---------------------------|-----|---------------------------------------------------------------------------------|-----------------------------------------------------------------------------------------------------------------------------------|----|----|--------------------------------------------------------------------------------------------------------------------------------------------------------------------------------------------------------------------------------------------------------------------------------------------------------------------------------------------------------------------------------------------------------------------------------------------------------------|----|
|                           |     |                                                                                 | Parent Attitude scale                                                                                                             |    |    |                                                                                                                                                                                                                                                                                                                                                                                                                                                              |    |
| Parker-Loewen 1987 Canada | RCT | 8 X 40 minute interaction coaching to encourage sensitive responding by mothers | Satisfaction with Parenting Scale<br>Knowledge of Infant Development Scale<br>Life experiences survey<br>Interaction rating scale | 35 | 35 | No significant difference between treatment and control group on interaction or knowledge of infant development or satisfaction with parenting                                                                                                                                                                                                                                                                                                               | 1- |
| Nurcombe 1984 USA         | RCT | Behavioural Assessment Scale: Mother-Infant Transaction Programme (MITP)        | Hereford Parent Attitude Survey<br>Seashore Self Confidence Rating Paired Comparison Questionnaire                                | 37 | 36 | Intervention group scored better on maternal adaptation (role satisfaction, attitudes to child-rearing, self confidence) than low birth weight controls (F(3, 87), p<0.030).<br>Univariate analysis:<br>Maternal satisfaction F (2,89), 4.55, p<0.013<br>Maternal attitude (2,89), 4.05, p<0.021<br>Maternal self confidence F (1,89), 7.44, p<0.008<br><br>Full term controls scored better than combined low birth weight group (F [3,87], 3.27, p=0.025). | 1+ |

| Author (Year) Country      | Study design | Objective                                                         | Setting                                                   | Study design/ outcome measures                                  | Intervention                                                                                 | Results                                                                                                                                                                                                                                            | Authors Conclusions                                                                                                                                             | Sign |
|----------------------------|--------------|-------------------------------------------------------------------|-----------------------------------------------------------|-----------------------------------------------------------------|----------------------------------------------------------------------------------------------|----------------------------------------------------------------------------------------------------------------------------------------------------------------------------------------------------------------------------------------------------|-----------------------------------------------------------------------------------------------------------------------------------------------------------------|------|
| Wielenga 2006, Netherlands | Qualitative  | Evaluation of NIDCAP                                              | NICU                                                      | NICU-Parent Satisfaction Form and the Nurse Parent Support Tool | NIDCAP                                                                                       | Parents were significantly more satisfied with care given according to NIDCAP principles than they were with the traditional care for their premature born babies.                                                                                 |                                                                                                                                                                 | 3    |
| Lawhorn 2002 USA           | Case series  | To report on a facilitating parent assessment of infant behaviour | NICU Convenience sample of 10 infants (≤1500g, ≤32 weeks, | Videotaped parent-infant interactions                           | An individualised nursing intervention based on assumptions of parent and infant competence; | The intervention enhanced the parents' ability to appraise the infant's behaviour and respond in a supportive manner (data not presented). Parents found it helpful in getting to know their infant and being more empowered in the infant's care. | NICU staff should support parents in gaining greater understanding of infant and sensitive interactions; parents need to be active collaborators in infant care | 3    |

|  |  |                          |                                                                          |  |                                                                                               |  |  |  |
|--|--|--------------------------|--------------------------------------------------------------------------|--|-----------------------------------------------------------------------------------------------|--|--|--|
|  |  | and supportive responses | appropriate for gestational age, no congenital abnormality) + 18 parents |  | discussion of videotaped interactions to discuss infant cues and promote supportive responses |  |  |  |
|--|--|--------------------------|--------------------------------------------------------------------------|--|-----------------------------------------------------------------------------------------------|--|--|--|

## 2b) Supporting parents through use of Behavioural Assessment Scales

| Author (Year) Country | Study design                                    | Objective                                                                                       | Setting                                            | Study design/ outcome measures                                                                                                                                  | Intervention                                                 | Results                                                                                                                                                                                                                                                                                                                               | Authors Conclusions                                                                                              | Sign |
|-----------------------|-------------------------------------------------|-------------------------------------------------------------------------------------------------|----------------------------------------------------|-----------------------------------------------------------------------------------------------------------------------------------------------------------------|--------------------------------------------------------------|---------------------------------------------------------------------------------------------------------------------------------------------------------------------------------------------------------------------------------------------------------------------------------------------------------------------------------------|------------------------------------------------------------------------------------------------------------------|------|
| Hawthorne 2005 UK     | Cross-sectional                                 | To evaluate Neonatal Behavioural Assessment Scale (NBAS) to support parent-infant relationship. | Neonatal unit<br>22 parents of premature infants   | 22 Questionnaire developed for study                                                                                                                            | Behavioural assessment scale                                 | Parents reported: NBAS helped parents adjust to baby's behaviours, increased parents confidence in caring for their baby, satisfied their information needs about their baby.                                                                                                                                                         | NBAS can improve parents knowledge and improve their confidence in caring for their infant.                      | 3    |
| Culp 1989 USA         | Cohort                                          | Demonstrating assessment of Premature Infant Behavior (APIB)                                    | NICU<br>14 couples + premature infants (<32 weeks) | Alternate allocation to demonstration of assessment (2 weeks before assessment of outcome) or not until afterwards<br><br>STAI<br>Neonatal Perception Inventory | Demonstrating assessment of Premature Infant Behavior (APIB) | Intervention fathers reported lower anxiety than non-intervention fathers (p<0.05). Both mothers and fathers in intervention group had more realistic perception of newborns (p<0.04). Intervention mothers more aware of newborn's abilities to shut out disturbing stimulation on repeated exposure (p<0.02)                        | Intervention appeared to reduce paternal anxiety and fostered more realistic perceptions of the premature infant | 3    |
| Szajnberg 1987, USA   | Qualitative (within cohort for infant outcomes) | Evaluation of Brazelton Newborn Behavioural Assessment Scale (BNBAS)                            | Home                                               | Structured interview                                                                                                                                            | BNBAS                                                        | At 6 months, mothers in the intervention group remembered more details from the BNBAS than control mothers did of the standard physical examinations. Intervention mothers tried more exam items at home and found more of the items helpful. There was a trend for mothers to visit their infants more often after the intervention. |                                                                                                                  | 3    |

## 2c) Supporting parents through breast feeding, kangaroo care and infant massage

| Author (Year) Country     | Study design | Intervention                                                                                                                                                | Outcome measure                                                                       | No of cases          | No. of controls | Statistically significant                                                                                                                                                                                                                                                                                                                                                                                                                                                                     | Quality (SIGN) |
|---------------------------|--------------|-------------------------------------------------------------------------------------------------------------------------------------------------------------|---------------------------------------------------------------------------------------|----------------------|-----------------|-----------------------------------------------------------------------------------------------------------------------------------------------------------------------------------------------------------------------------------------------------------------------------------------------------------------------------------------------------------------------------------------------------------------------------------------------------------------------------------------------|----------------|
| Lai<br>2006<br>Taiwan     | RCT          | Effects of kangaroo care combined with music                                                                                                                | State-Trait Anxiety Inventory (STAI)                                                  | 15                   | 15              | Music during KC also resulted in significantly lower maternal anxiety in the treatment group on day 3 of the interention ( $t(19.6) = -2.14, p < .05$ ). Maternal state anxiety improved daily, indicating a cumulative dose effect ( $F(1.49,40.39) = 5.81, p < .01$ ). Anxiety levels in the control remained unchanged                                                                                                                                                                     | 1+             |
| Ferber<br>2004<br>Israel  | RCT          | Baby massage:<br>I= to receive 15 massages 3 times per day for 5 days.<br>Gp1: mothers conduct massage<br>Gp2: Researchers conduct massage<br>Gp 3 controls | Coding Interactive Behaviour Assessment for newborn                                   | Gp 1: 18<br>Gp 2: 18 | 19              | Significant results report that at 3 months, mothers of massaged infants were less intrusive, and interactions were more reciprocal.<br>Gp1: Dyadic reciprocity (DR) – 2.42+0.87<br>Maternal Intrusiveness(MI)-1.97+0.91<br>Gp2: DR – 2.46+0.99<br>MI – 1.68+0.63<br>Gp3: DR – 1.66+0.68<br>MI – 2.54+1.01<br>DR: $F=4.69, p < 0.01$<br>MI: $F=4.05, p < 0.02$<br><br>No significant difference in maternal sensitivity was reported.                                                         | 1+             |
| Feldman<br>2002<br>Israel | Cohort       | Effects of Kangaroo care                                                                                                                                    | Mother-Infant interaction scale<br>Maternal depression<br>Mothers perceptions<br>HOME | 73                   | 73              | At 37 weeks gestational age: After kangaroo care, interactions more positive, mothers showed more positive affect, touch, adaptation to infant cues, infants more alertness and less gaze aversion, mothers less depressed & viewed infants as less abnormal. Less maternal depression [KC mean 6.68 (5.55) vs control 9.05 (4.27), $F=5.68, p < 0.05$ ].<br><br>At 3 months corrected age: mothers and fathers of kangaroo care infants more sensitive and provided better home environment. | 2+             |

1  
2  
3  
4  
5  
6  
7  
8  
9  
10  
11  
12  
13  
14  
15  
16  
17  
18  
19  
20  
21  
22  
23  
24  
25  
26  
27  
28  
29  
30  
31  
32  
33  
34  
35  
36  
37  
38  
39  
40  
41  
42  
43  
44  
45  
46  
47

|                          |     |                                                                                        |                                                                                                                  |     |     |                                                                                                                                                                                                                                                                                                                                                                                                                                                                                                                                                                                                                                                                                                                                                                                                                                                                                                                                                                                                                                                                                |    |
|--------------------------|-----|----------------------------------------------------------------------------------------|------------------------------------------------------------------------------------------------------------------|-----|-----|--------------------------------------------------------------------------------------------------------------------------------------------------------------------------------------------------------------------------------------------------------------------------------------------------------------------------------------------------------------------------------------------------------------------------------------------------------------------------------------------------------------------------------------------------------------------------------------------------------------------------------------------------------------------------------------------------------------------------------------------------------------------------------------------------------------------------------------------------------------------------------------------------------------------------------------------------------------------------------------------------------------------------------------------------------------------------------|----|
|                          |     |                                                                                        |                                                                                                                  |     |     | <p>KC Mothers provided a better home environment Manova at 3 months – HOME: Wilks F (df=7,123), 2.99, p&lt;0.01. KC fathers provided a better home environment – HOME: Wilks F (df=7,110), 2.45, p&lt;0.05.</p> <p>At 6 months corrected age: kangaroo care mothers more sensitive (maternal sensitivity: KC mean 4.20 (0.64) vs control mean 3.86 (0.76, univariate 5.36, p&lt;0.05) &amp; infants scored higher on Bayley Mental Development Index (96.39 vs. 91.81, p&lt;0.01) and Psychomotor Development Index (85.47 vs. 80.53, p&lt;0.05)</p>                                                                                                                                                                                                                                                                                                                                                                                                                                                                                                                           |    |
| Hall 2002<br>Canada      | RCT | Weighing infant before and after feeds to assess maternal confidence in breast feeding | Parental sense of competence scale<br>Maternal confidence questionnaire<br>Influence of specific referents scale | 30  | 30  | No significant differences in maternal confidence or competence between weighed or not-weighed infants                                                                                                                                                                                                                                                                                                                                                                                                                                                                                                                                                                                                                                                                                                                                                                                                                                                                                                                                                                         | 1- |
| Tessier 1998<br>Columbia | RCT | Effects of Kangaroo care                                                               | Mothers perception of premature babies questionnaire                                                             | 246 | 246 | <p>Kangaroo care significantly increased mother’s sense of competence in mothering their baby (F(1481) 10.36, P .001), and was significantly increased maternal sensitivity to their baby at the neonatal unit. ( F(1481) 3.71, P .05). This improved perception of their baby effect is related to a subjective “bonding effect” that may be understood readily by the empowering nature of the KMC intervention. The study also reported a negative effect on the feelings of received support from health professionals of mothers practicing KMC (F 5.03, P .03).</p> <p>Kangaroo care significantly reduced length of stay especially in lighter babies.<br/>Two-way analysis of variance stratifying by birth weight showed that the savings in hospital stays were clearly related to weight at birth: an interaction effect ( F(3480) 4.06, P .01) shows that the maximum saving in the KMC group was observed in infants weighing 1501 g (4.5 to 6.7 days), whereas in infants weighing 1500g, the length of hospital stay was virtually identical in both groups</p> | 1+ |



1  
2  
3  
4  
5  
6  
7  
8  
9  
10  
11  
12  
13  
14  
15  
16  
17  
18  
19  
20  
21  
22  
23  
24  
25  
26  
27  
28  
29  
30  
31  
32  
33  
34  
35  
36  
37  
38  
39  
40  
41  
42  
43  
44  
45  
46  
47

| Author (Year) Country | Study design    | Objective                                                             | Setting                                                                                                 | Study design/ outcome measures                                         | Intervention                                                                                                                                                                                                         | Results                                                                                                                                                                                                                                                                                                                                                                                                                                           | Authors Conclusions                                                                                          | Sign |
|-----------------------|-----------------|-----------------------------------------------------------------------|---------------------------------------------------------------------------------------------------------|------------------------------------------------------------------------|----------------------------------------------------------------------------------------------------------------------------------------------------------------------------------------------------------------------|---------------------------------------------------------------------------------------------------------------------------------------------------------------------------------------------------------------------------------------------------------------------------------------------------------------------------------------------------------------------------------------------------------------------------------------------------|--------------------------------------------------------------------------------------------------------------|------|
| White 2000 USA        | Case series     | To evaluate feeding support by occupational therapists (OTs)          | NICU<br>9 parents of premature infants receiving OT services for feeding issues                         | Interview questionnaire                                                | OTs involved in parent education in NICU (e.g. oral-facial stimulation, positioning, oral support techniques, typical feeding development) using demonstration, discussion, hands-on training, handouts, videos etc. | Parents reported receiving education about oral-facial stimulation and oral support techniques (9/9 reported), positioning, typical feeding development (8/9 reported); hands-on training and demonstration reported most frequently. Overall, parents felt 'confident' or 'very confident' in their ability to understand topics. 5/9 indicated they thought they would not need additional help after discharge; 3/9 felt they would; 1 unsure. | Parents perceived OTs were providing effective education & support in infant feeding techniques              | 3    |
| Elliott 1998 Canada   | Qualitative     | To evaluate a telephone follow up programme to support breast-feeding | Home<br>20 mothers                                                                                      | Structured interview                                                   | Telephone call with structured questions to complete form (e.g. feeding patterns, any problems, plan to address problems, any referrals needed)                                                                      | All mothers reported finding telephone call helpful and increasing their confidence in continuing to breast feed.                                                                                                                                                                                                                                                                                                                                 | Telephone support can help mothers breastfeed premature infants at home                                      | 3    |
| Legault 1995 Canada   | Cross-sectional | Effects of kangaroo (skin to skin) care                               | NICU<br>61 mother-infant dyads experiencing both traditional and kangaroo-type transfers from incubator | Satisfaction questionnaire<br><br>Maternal Satisfaction Question-naire | Kangaroo (skin to skin) care                                                                                                                                                                                         | Kangaroo method was preferred by 73.8% of mothers, mainly because the infant was closer to them and they could touch them more easily.                                                                                                                                                                                                                                                                                                            | Kangaroo method encourages early contact with infant & induces feelings of wellbeing & fulfilment in parents | 3    |

|                    |                 |                                                                            |                                                |                            |                                    |                                                                                                                                                                                                                                  |                                                                                                                                                                    |   |
|--------------------|-----------------|----------------------------------------------------------------------------|------------------------------------------------|----------------------------|------------------------------------|----------------------------------------------------------------------------------------------------------------------------------------------------------------------------------------------------------------------------------|--------------------------------------------------------------------------------------------------------------------------------------------------------------------|---|
| Remedios 2005, USA | Qualitative     | To evaluate the effect of baby massage on the parents of premature infants | Neonatal unit                                  | Semi-structured interviews | Baby massage                       | Parents reported feeling 'closer' to their infants, and reported improved confidence in caring for their infant. Parents felt the baby massage was beneficial to the infant and themselves.                                      | For the parents of a premature baby, baby massage can help improve the sense of closeness to their infant and improve their confidence in caring for their infant. | 3 |
| Meier 1993 USA     | Cross-sectional | Breast feeding support                                                     | NICU<br>132 parents of premature infants       | Survey                     | Breast feeding intervention record | Mothers more likely to be breast feeding than comparable populations                                                                                                                                                             | Breast feeding support encourages mothers in the NICU to breast feed and to continue to breast feed for longer.                                                    | 3 |
| Affonso 1993, USA  | Qualitative     | Evaluation of Skin to skin care (SSC) for premature infants                | NICU<br>Mothers                                | Interview                  | Kangaroo care                      | SSC provided a way for mothers to know their infants, to develop strong positive feelings towards them, and to reconcile their feelings about having a premature birth, so that emotional healing could take place.              | Kangaroo care improved mother-infant interactions.                                                                                                                 | 3 |
| Gale 1993 USA      | Case series     | Effects of kangaroo (skin to skin) care                                    | NICU<br>25 intubated infants and their parents | Interviews                 | Kangaroo (skin to skin) care       | Parents described kangaroo care as beneficial, giving stronger identity with and knowledge of infant; greater confidence in infant's need for them and their ability to need these needs; greater confidence in asking questions | Nurses can support parental attachment by supporting kangaroo holding                                                                                              | 3 |

#### 2d) Support Forums for Parents:

| Author (Year) Country | Study design | Intervention                  | Outcome measure                                                        | No of cases | No. of controls | Statistically significant                                                                                                                                                                                                                                                                                                                                                                                                                                                                                                                                                                  | Quality (SIGN) |
|-----------------------|--------------|-------------------------------|------------------------------------------------------------------------|-------------|-----------------|--------------------------------------------------------------------------------------------------------------------------------------------------------------------------------------------------------------------------------------------------------------------------------------------------------------------------------------------------------------------------------------------------------------------------------------------------------------------------------------------------------------------------------------------------------------------------------------------|----------------|
| Preyde 2003 Canada    | Cohort       | Parent to Parent Peer Support | Parental Stressor scale (x)<br>State-Trait Anxiety Scale (Spielberger) | 32          | 28              | Intervention group better scores on all measures at 4 or 16 weeks (groups were equivalent at baseline), e.g. mean PSS score 1.54 (1.3-1.7) in intervention group at 4 weeks vs. 2.93 (2.7-3.1) in controls, p<0.001<br><br>At 4 weeks mean PSS score was significantly less in the intervention group – 1.54 (1.3-1.7) vs 2.93 (2.7-3.1), p<0.001.<br>At 16 weeks mean anxiety score, mean depression score, and perceived support were significantly less in the intervention group: anxiety - 31.4 (27.2-35.4) vs 38.6 (34.6-42.7), p<0.05; depression - 2.20 (0.89-3.60) vs 4.88 (3.51- | 2++            |

|                        |        |                                                                                |               |    |    |                                                                                                                                                                     |    |
|------------------------|--------|--------------------------------------------------------------------------------|---------------|----|----|---------------------------------------------------------------------------------------------------------------------------------------------------------------------|----|
|                        |        |                                                                                |               |    |    | 6.17), p<0.01; perceived support – 6.49 (6.02-6.82) vs 5.48 (5.09-5.94), p<0.01.<br>There were no different in trait anxiety between the groups at any time period. |    |
| Lindsay<br>1993<br>USA | Cohort | Parent to Parent Peer support for parents with critically ill pre-term babies. | Parent report | NR | NR | Numerical data not reported in paper<br>Reported benefit to parents: emotional support + Information support                                                        | 2- |

| Author (Year) Country | Study design | Objective                                                                                                          | Setting                                                                              | Study design/ outcome measures                                                                                                                                                              | Intervention                                                                                                                           | Results                                                                                                                                                                                                                                                                                                                                                                                                                                                         | Authors Conclusions                                                                                                                                                                                                                                                                                                                            | Sign |
|-----------------------|--------------|--------------------------------------------------------------------------------------------------------------------|--------------------------------------------------------------------------------------|---------------------------------------------------------------------------------------------------------------------------------------------------------------------------------------------|----------------------------------------------------------------------------------------------------------------------------------------|-----------------------------------------------------------------------------------------------------------------------------------------------------------------------------------------------------------------------------------------------------------------------------------------------------------------------------------------------------------------------------------------------------------------------------------------------------------------|------------------------------------------------------------------------------------------------------------------------------------------------------------------------------------------------------------------------------------------------------------------------------------------------------------------------------------------------|------|
| Buarque, 2006         | Qualitative  | To investigate the influence of support groups on the family of risk newborn infants and on neonatal unit workers. | Neonatal unit<br>13 mothers, six fathers, two grandmothers and 16 healthcare workers | Semi-structured interviews                                                                                                                                                                  | None                                                                                                                                   | The analysis revealed that the support group to the family of risk newborns provided parents and family members with information, emotional support and strengthening so that they could come to terms with the birth of their child and his/her admission to the neonatal unit, in addition to enabling parents to take care of the newborn infant. There was interpersonal growth in the interaction between parents, family members, and healthcare workers. | The support group to the family of risk newborns uses an approach that is based on family-centered care. These principles allow restoring parental competence, helping healthcare workers to respect values and feelings of family members, and establishing a collaborative work between parents and healthcare workers in the neonatal unit. | 3    |
| Hurst et al, 2006     | Qualitative  | To identify parents' utilization and evaluation of a support program based in a newborn intensive care unit (NICU) | NICU<br>477 parents utilised support service, 48 completed survey                    | Program records and a survey developed by the author documented parental use and evaluation of services. Data analysis consisted of descriptive statistics and qualitative content analysis | Support programme that offered a combination of formats for support services: group support, one-to-one support, and telephone support | 78% utilized 1 support service format exclusively. Eighteen percent utilized 2 support formats concurrently. A subsample of 48 parents completed an evaluation survey. Group support offered more opportunities for families to problem-solve communication issues with nursery personnel and provide information that assisted parents' involvement in their babies' care. Utilising more than one support format provided greater support for parents.        | Parent support programs that utilize only one type of format may not be optimal for providing the range of support needed by many NICU families. Parent support programs offer an important mechanism to assess provider approaches to facilitate family-centered care.                                                                        | 3    |
| Pearson 2001 USA      | Qualitative  | To evaluate a programme to promote positive parenting in NICU                                                      | NICU (level III and special care (level II) nurseries<br>104 parents (59 mothers +   | Interviews                                                                                                                                                                                  | Parent's Circle: 90-minute information session + support to parents as they cope with early                                            | Parents learned that they: could still parent even when baby is in hospital; could receive support from people going through similar experiences. They helped normalise the experience, helped parents to interact with their baby. Book                                                                                                                                                                                                                        | Attending Parent's Circle helped families gain perspective, feel supported, learn key developmental concepts, locate hospital and community resources, and optimise interaction with infant                                                                                                                                                    | 3    |

|                        |                 |                                                       |                                                                           |                                             |                                                                                                                                                                                                                                                                                                  |                                                                                                                                                                                                                                                                                                                                                                                          |                                                                                                                                                                                                     |   |
|------------------------|-----------------|-------------------------------------------------------|---------------------------------------------------------------------------|---------------------------------------------|--------------------------------------------------------------------------------------------------------------------------------------------------------------------------------------------------------------------------------------------------------------------------------------------------|------------------------------------------------------------------------------------------------------------------------------------------------------------------------------------------------------------------------------------------------------------------------------------------------------------------------------------------------------------------------------------------|-----------------------------------------------------------------------------------------------------------------------------------------------------------------------------------------------------|---|
|                        |                 | (Parent's Circle)                                     | 45 fathers who attended Parent's Circle, + 44 NICU or special care nurses |                                             | birth – allows parents to tell their story; curriculum based on parents' needs, includes development, how parents can help baby, how baby responds to stimuli, learning to read subtle cues from infant & respond appropriately, getting parents involved in infant care plan, sharing resources | list and classes were available after discharge. Staff reported that attending the Parent's Circle instils confidence in parents, helps them read baby's signals, normalises, introduces concepts such as kangaroo care that parents then want to try.                                                                                                                                   |                                                                                                                                                                                                     |   |
| Bracht 1998b<br>Canada | Cross-sectional | To report parent perceptions of NICU follow-up clinic | NICU 16 families attending clinic                                         | Satisfaction survey – methods not described | Integrated Neonatal Follow-Up Program: comprehensive, long-term developmental assessments, diagnosis & referral for children at high risk of developmental delay                                                                                                                                 | All families reported that they were very satisfied with services provided by multidisciplinary team; they valued information & support re high risk infant; but needed more information re growth & development, nutrition needs, medical concerns (e.g. asthma).                                                                                                                       | Continuity of care provided by clinic staff nurses provided: support, education, written information; maintenance of rapport developed during hospitalisation; and liaison with community resources | 3 |
| Jarrett 1996<br>USA    | Case series     | Evaluation of parent support programme                | Neonatal unit                                                             | Reported discussion                         | Parents were trained to be parent partners – being taught factual information and to be active listeners. Trained parents matched with new parents by infant                                                                                                                                     | Parents reported feeling less anxious and less worried about their infant. The program was meeting its goal of support and programme provided a special relationship where parents in the NICU could take their worries and concerns. This relationship was most often nurtured through exchanges on the telephone, but parents also met in the parent lounge that was set up as part of | The parent support programme has provided parents with trained partner parents reducing parents level of anxiety and improving their confidence with their infant.                                  | 3 |

|                 |             |                                                 |               |                     |                 |                                                                                                                                                                                                               |                                                                                         |   |
|-----------------|-------------|-------------------------------------------------|---------------|---------------------|-----------------|---------------------------------------------------------------------------------------------------------------------------------------------------------------------------------------------------------------|-----------------------------------------------------------------------------------------|---|
|                 |             |                                                 |               |                     | characteristics | the parent support effort in the hospital.<br>New parents unanimously reported that the most helpful thing about the program was the comfort in talking with someone who had experienced a similar situation. |                                                                                         |   |
| Dammers 1982 UK | Case Series | To report parents' perceptions of support group | Neonatal unit | Reported discussion |                 | Parents reported having increased knowledge and greater confidence in caring for their infant                                                                                                                 | Parents found the support group beneficial in increasing their knowledge and confidence | 3 |

## 2e) Alleviate parental stress

| Author (Year) Country | Study design | Intervention                                                                                                                                                                                                                                                                                           | Outcome measure                                                              | No of cases | No. of controls          | Statistically significant                                                                                                                                                                                                                                                                                                                                                                                                                                                                                                                                                                           | Quality (SIGN) |
|-----------------------|--------------|--------------------------------------------------------------------------------------------------------------------------------------------------------------------------------------------------------------------------------------------------------------------------------------------------------|------------------------------------------------------------------------------|-------------|--------------------------|-----------------------------------------------------------------------------------------------------------------------------------------------------------------------------------------------------------------------------------------------------------------------------------------------------------------------------------------------------------------------------------------------------------------------------------------------------------------------------------------------------------------------------------------------------------------------------------------------------|----------------|
| Kaarsen 2006          | RCT          | Mother-Infant Transaction Program<br>The intervention consisted of 8 sessions shortly before discharge and 4 home visits by specially trained nurses focusing on the infant's unique characteristics, temperament, and developmental potential and the interaction between the infant and the parents. | PSI                                                                          | 71          | 69<br>preterm<br>75 term | Early-intervention program reduces parenting stress in both mothers and fathers during the first year after a preterm birth to a level comparable to their term peers<br><br>Mothers 6 mths - total stress: 16.9 (5.2 to 28.5) .005<br>Mothers 12mths – total stress: 13.7 (1.6 to 25.9) .03<br>Fathers 12 moths – total stress: 14.8 (2.1 to 27.6) .02                                                                                                                                                                                                                                             | 1+             |
| Jotzo 2005 Germany    | Cohort       | Psychological intervention to reduce stress at neonatal unit (One off psychological intervention to help parents cope with stress)                                                                                                                                                                     | Questionnaire:<br>Impact of events scale (IES)<br>Trauma experiences measure | 25          | 25                       | Mothers in intervention group had significantly lower traumatic impact from preterm birth (lower overall symptoms: traumatic impact I 25.2 (SD 13.9), C 37.5 (SD 19.2), mean difference 12.28 (2.74-21.82, p=0.013; lower avoidance I 7.7 (SD 5.3), C 12.4 (SD 8.4), mean difference 4.65 (0.67-8.69), p=0.023 and hyperarousal, I 5.9 (SD 4.7), C9.5 (SD 5.7), mean difference – 3.56 (0.61 – 6.51), p=0.019; lower intrusion symptoms but not significant). Control group: 76% of mothers showed clinically significant psychological trauma at discharge vs. 36% (p<0.01) in intervention group. | 2+             |
| Als 2003 USA          | RCT          | NIDCAP (Neonatal individualised Developmental Care and Assessment Programme)                                                                                                                                                                                                                           | PSI (Parental Stress Index)                                                  | 38          | 38                       | Mothers in the intervention group reported significantly more favourable scores than the control group.<br><br>Hospital 1: I= 35.7 (sd 21.3)                                                                                                                                                                                                                                                                                                                                                                                                                                                        | 1++            |

1  
2  
3  
4  
5  
6  
7  
8  
9  
10  
11  
12  
13  
14  
15  
16  
17  
18  
19  
20  
21  
22  
23  
24  
25  
26  
27  
28  
29  
30  
31  
32  
33  
34  
35  
36  
37  
38  
39  
40  
41  
42  
43  
44  
45  
46  
47

|                         |     |                                                                                                                                                                                 |                                                                                                    |                          |    |                                                                                                                                                                                                                                                                                                                                                                                                                                                                                     |    |
|-------------------------|-----|---------------------------------------------------------------------------------------------------------------------------------------------------------------------------------|----------------------------------------------------------------------------------------------------|--------------------------|----|-------------------------------------------------------------------------------------------------------------------------------------------------------------------------------------------------------------------------------------------------------------------------------------------------------------------------------------------------------------------------------------------------------------------------------------------------------------------------------------|----|
|                         |     |                                                                                                                                                                                 |                                                                                                    |                          |    | <p>C=44.9 (sd34.2)<br/>Hospital 2: I=55.8 (sd28.8)<br/>C=65.2 (sd27.5)<br/>Hospital 3: I=49.0 (sd28.6)<br/>C=55.9 (sd22.5)<br/>Group score <math>\bar{x}</math> = .41, p&lt;.001<br/>Summary: MANOVA: F=2.41, df=5.66, p&lt;0.05</p>                                                                                                                                                                                                                                                |    |
| Cobiella<br>1990<br>USA | RCT | Two stress reduction programmes:<br>a) Video-tape training in active problem – focussed coping strategies<br><br>b) Video-tape in emotion-focussed strategies to manage anxiety | State-Trait Anxiety Inventory (STAI), Depression Adjective Checklist (DACL)                        | Gp. A – 10<br>Gp. B - 10 | 10 | <p>On post-treatment follow-up both the problem-focused and emotion-focused treatment groups were significantly less anxious than the controls and lower levels of depression were observed for the emotion-focused group</p> <p>STAI: PF-t(11)=2.71 p&lt;0.01<br/>EF-t(11)=2.56 p&lt;0.02<br/>DACL: PF – NS<br/>EF-t(12)=2.36, p&lt;0.03</p>                                                                                                                                       | 1- |
| Nurcombe<br>1984<br>USA | RCT | Behavioural Assessment Scale: Mother-Infant Transaction Programme (MITP)                                                                                                        | Hereford Parent Attitude Survey<br>Seashore Self Confidence Rating Paired Comparison Questionnaire | 37                       | 36 | <p>Intervention group scored better on maternal adaptation (role satisfaction, attitudes to child-rearing, self confidence) than low birth weight controls (F(3, 87), p&lt;0.030).<br/>Univariate analysis:<br/>Maternal satisfaction F (2,89), 4.55, p&lt;0.013<br/>Maternal attitude (2,89), 4.05, p&lt;0.021<br/>Maternal self confidence F (1,89), 7.44, p&lt;0.008</p> <p>Full term controls scored better than combined low birth weight group (F [3,87], 3.27, p=0.025).</p> | 1+ |

| Author (Year) Country    | Study design    | Objective                     | Setting                                  | Study design/ outcome measures                                     | Intervention                             | Results                                                                                                                                                                                                                                                                                                                                                                      | Authors Conclusions                                                                          | Sign |
|--------------------------|-----------------|-------------------------------|------------------------------------------|--------------------------------------------------------------------|------------------------------------------|------------------------------------------------------------------------------------------------------------------------------------------------------------------------------------------------------------------------------------------------------------------------------------------------------------------------------------------------------------------------------|----------------------------------------------------------------------------------------------|------|
| Macnab<br>1998<br>Canada | Cross-sectional | Evaluation of Journal writing | Special care nursery (SCN)<br>73 parents | Survey 6 weeks after giving information booklet on journal writing | Giving information about journal writing | 32% kept a journal; 73% found it reduced their stress; 68% used it as a means to address the most stressful elements of the experience (most stressful elements were the feelings engendered by having a baby in special care & interactions with staff; the same percentage as those talking things through with a friend to reduce stress). Journals were used to document | Encouraging parents to keep a journal is a constructive way to deal with SCN-related stress. | 3    |

1  
2  
3  
4  
5  
6  
7  
8  
9  
10  
11  
12  
13  
14  
15  
16  
17  
18  
19  
20  
21  
22  
23  
24  
25  
26  
27  
28  
29  
30  
31  
32  
33  
34  
35  
36  
37  
38  
39  
40  
41  
42  
43  
44  
45  
46  
47

|                    |              |               |      |           |               |                                                                                                                                                                                                                                                                                                                                                                                                                                                                                                                                                                                                                                                                                                                                          |                                                                                                                                                      |   |
|--------------------|--------------|---------------|------|-----------|---------------|------------------------------------------------------------------------------------------------------------------------------------------------------------------------------------------------------------------------------------------------------------------------------------------------------------------------------------------------------------------------------------------------------------------------------------------------------------------------------------------------------------------------------------------------------------------------------------------------------------------------------------------------------------------------------------------------------------------------------------------|------------------------------------------------------------------------------------------------------------------------------------------------------|---|
|                    |              |               |      |           |               | involvement in care (45%), record keeping (36%) and organising thoughts (27%). All those who kept a journal recommended it to others. Positive feelings were holding baby for the first time; meeting & speaking with other parents; openness and honesty of nursery staff; impression that infant was loved and cared for. Parents said the journal would be a record for the child for later; helped to record progress & show how well parents coped. Parents made suggestions that photos etc should be included in the journals.                                                                                                                                                                                                    |                                                                                                                                                      |   |
| Zeanah<br>1984 USA | Case reports | Psychotherapy | NICU | Interview | Psychotherapy | Psychotherapy helped parents accept their feelings and conflicts as common to many NICU parents; Case conferences helped clarify misconceptions that had arisen because of the large number of people involved in baby's care. When unable to travel to unit, calls kept parents informed, enhanced participation; consistency maintained in information given, questions encouraged. Parents were encouraged to make tape of themselves singing & talking to baby, telling stories so that they could 'be with' her even when they were at home; encouraged to discuss using photo of infant. Became able to discuss disappointment about babies many problems and anxiety about long-term effects & involvement with babies increased. | Psychotherapy as crisis intervention, supportive and insight-orientated (awareness that conflicts interfere with optimal parent-infant relationship) | 3 |

2f) Preparing parents for seeing their infant the neonatal unit for the first time

| Author (Year) Country | Study design | Intervention                                    | Outcome measure | No of cases | No. of controls | Statistically significant                               | Quality (SIGN) |
|-----------------------|--------------|-------------------------------------------------|-----------------|-------------|-----------------|---------------------------------------------------------|----------------|
| Huckaby               | RCT          | Photograph of baby given to mother to take with | Bonding         | 20          | 20              | Mothers with picture had significantly better scores on | 1+             |

1  
2  
3  
4  
5  
6  
7  
8  
9  
10  
11  
12  
13  
14  
15  
16  
17  
18  
19  
20  
21  
22  
23  
24  
25  
26  
27  
28  
29  
30  
31  
32  
33  
34  
35  
36  
37  
38  
39  
40  
41  
42  
43  
44  
45  
46  
47

|             |  |                                  |                                                                                    |  |  |                                                                                   |  |
|-------------|--|----------------------------------|------------------------------------------------------------------------------------|--|--|-----------------------------------------------------------------------------------|--|
| 1999<br>USA |  | them while baby on neonatal unit | Observation Checklist (BOCL)<br>Physical Examination Observation Checklist (PEOCL) |  |  | bonding measure than those without picture (p<0.001 for BOCL and p<0.01 on PEOCL) |  |
|-------------|--|----------------------------------|------------------------------------------------------------------------------------|--|--|-----------------------------------------------------------------------------------|--|

| Author (Year) Country | Study design | Objective                                                                           | Setting                         | Study design/ outcome measures | Intervention | Results                                                                                                                                                                                                                                                                                                                                          | Authors Conclusions | Sign |
|-----------------------|--------------|-------------------------------------------------------------------------------------|---------------------------------|--------------------------------|--------------|--------------------------------------------------------------------------------------------------------------------------------------------------------------------------------------------------------------------------------------------------------------------------------------------------------------------------------------------------|---------------------|------|
| Griffin 1997 USA      | Qualitative  | To evaluate a tour of neonatal unit prior to birth if high risk pregnancy diagnosed | NICU<br>10 mothers<br>3 fathers | Interview                      | Tour of NICU | All parents recommended that parents diagnosed with a high-risk pregnancy be offered a prenatal tour of the NICU. The tour benefited parents and (a) decreased fears, (b) inspired hope for the infant's prognosis, (c) provided reassurance about the care in the NICU, and (d) prepared parents for their infant's hospitalization in the NICU |                     | 3    |

2g) Interventions to improve communication at the neonatal unit

| Author (Year) Country | Study design | Intervention                   | Outcome measure                                                                                                                                      | No of cases | No. of controls | Statistically significant                                                                                                                                                                                                                                                                                                                                                                                                                                                                                                                     | Quality (SIGN) |
|-----------------------|--------------|--------------------------------|------------------------------------------------------------------------------------------------------------------------------------------------------|-------------|-----------------|-----------------------------------------------------------------------------------------------------------------------------------------------------------------------------------------------------------------------------------------------------------------------------------------------------------------------------------------------------------------------------------------------------------------------------------------------------------------------------------------------------------------------------------------------|----------------|
| Koh 2007 Australia    | RCT          | Recording doctors consultation | Information recall<br><br>91% of mothers in the tape group listened to the tape (once by day 10, twice by four months, and three times by 12 months; | 93          | 93              | At 10 days and four months, mothers in the tape group recalled significantly more information about diagnosis, treatment and outcomes than control group.<br><br>Recall at 10 days: 1.35 (1.08 to 1.69) p<0.007, treatment 1.35 (1.00 to 1.84) and outcome 1.24 (1.05 to 1.47), p<0.009 than mothers in the control group.<br><br>Recall at 4 months: diagnosis 1.27 (0.99 to 1.63) p<0.05, treatment 1.35 (1.00 to 1.84) p<0.045, and outcome 1.75 (1.27 to 2.4), p<0.004<br><br>No statistically significant differences were found between | 1+             |



1  
2  
3  
4  
5  
6  
7  
8  
9  
10  
11  
12  
13  
14  
15  
16  
17  
18  
19  
20  
21  
22  
23  
24  
25  
26  
27  
28  
29  
30  
31  
32  
33  
34  
35  
36  
37  
38  
39  
40  
41  
42  
43  
44  
45  
46  
47

|                          |        |                                         |                                                                                                                                     |    |    |                                                                                                                                                                                                                                                                                                                                                                                                                                                                                                                                                                             |     |
|--------------------------|--------|-----------------------------------------|-------------------------------------------------------------------------------------------------------------------------------------|----|----|-----------------------------------------------------------------------------------------------------------------------------------------------------------------------------------------------------------------------------------------------------------------------------------------------------------------------------------------------------------------------------------------------------------------------------------------------------------------------------------------------------------------------------------------------------------------------------|-----|
|                          |        |                                         | range 1-10).                                                                                                                        |    |    | the groups in satisfaction with conversations (10 days), postnatal depression and anxiety scores (10 days, four and 12 months), and stress about parenting (12 months).                                                                                                                                                                                                                                                                                                                                                                                                     |     |
| Penticuff<br>2005<br>USA | Cohort | Discussion around Infant progress chart | Comprehension of infant medical condition and satisfaction with collaboration with health professionals while baby at neonatal unit | 77 | 77 | Intervention group had fewer unrealistic concerns (ANOVA): (4.32 (0.86) vs 8.56 (0.57), p<0.018; less uncertainty about the infant medical condition 1.92 (0.30) vs 3.52 (0.54), p< 0.003; had less decision conflict 45.88 (2.33) vs 59.10 (2.32), p<0.001; more satisfaction with medical decisions process 120.20 (4.07), 104.95 (4.33), p<0.012; more satisfaction with decision input 33.44 (1.30) vs 30.05 (1.21), p<0.058.<br><br>No significant difference was reported in satisfaction of care for the infant by HC staff, and in satisfaction with decision made. | 2++ |
| Piecuch<br>1983<br>USA   | Cohort | videophone                              | No. of calls made to neonatal unit while baby at unit                                                                               | 17 | 17 | Mean number of telephone calls to NICU used as proxy for interest in newborns. Mothers with access to videophone made more calls: (1.0 vs. 0.2, p< 0.05) when mothers hospitalised; (0.9 vs. 0.3, p<0.05) when mother discharged. Mothers appreciated videophone; relieved at being able to see infants; infant's condition not as bad as they had imagined; many talked to infant even though only viewing an image; wanted to see close-ups of hands and feet as well as face.                                                                                            | 2 - |

| Author (Year) Country        | Study design | Objective                                                                                                                            | Setting                        | Study design/ outcome measures | Intervention | Results                                                                                                                                                                                                                                                                                                                                                                                                                                                                    | Authors Conclusions                                                                                                                                                                                                                                | Sign |
|------------------------------|--------------|--------------------------------------------------------------------------------------------------------------------------------------|--------------------------------|--------------------------------|--------------|----------------------------------------------------------------------------------------------------------------------------------------------------------------------------------------------------------------------------------------------------------------------------------------------------------------------------------------------------------------------------------------------------------------------------------------------------------------------------|----------------------------------------------------------------------------------------------------------------------------------------------------------------------------------------------------------------------------------------------------|------|
| Jones et al, 2007, Australia | Qualitative  | To report mothers' and fathers' perceptions of effective and ineffective communication by nurses in the neonatal intensive care unit | NICU 20 mothers and 13 fathers | Semi-structured interviews     | None         | The most frequently mentioned strategies for effective communication were discourse management and emotional expression, highlighting the importance for parents of communication that is both nurturing and shares the exchange of information as equal partners.<br><br>Parents valued communication that was two-way and involved informal chatting as well as more formal discussions. Parents wanted provision of information in a reassuring and respectful way. The | Strategies mentioned for effective communication were about shared management of the interaction and appropriate support and reassurance by nurses.<br><br>Mothers emphasised more being encouraged as equal partners in the care of their infant. | 3    |

|                          |                 |                                                                                                                                                                           |                                                                                                                                   |                                  |                                                                                                   |                                                                                                                                                                                                                                                                                                                                                                                                                                                                                                                                                                                                                                                                                                                                                           |                                                                                                                                                                                                                                                                                                                                                                                                                                                                      |   |
|--------------------------|-----------------|---------------------------------------------------------------------------------------------------------------------------------------------------------------------------|-----------------------------------------------------------------------------------------------------------------------------------|----------------------------------|---------------------------------------------------------------------------------------------------|-----------------------------------------------------------------------------------------------------------------------------------------------------------------------------------------------------------------------------------------------------------------------------------------------------------------------------------------------------------------------------------------------------------------------------------------------------------------------------------------------------------------------------------------------------------------------------------------------------------------------------------------------------------------------------------------------------------------------------------------------------------|----------------------------------------------------------------------------------------------------------------------------------------------------------------------------------------------------------------------------------------------------------------------------------------------------------------------------------------------------------------------------------------------------------------------------------------------------------------------|---|
|                          |                 | (NICU) environment                                                                                                                                                        |                                                                                                                                   |                                  |                                                                                                   | study highlights that not only do parents simply want lots of information they also want consistent information.                                                                                                                                                                                                                                                                                                                                                                                                                                                                                                                                                                                                                                          |                                                                                                                                                                                                                                                                                                                                                                                                                                                                      |   |
| Freer, 2005, Scotland    | Case study      | To report on Babylink (an individual website approach to sharing information with parents)                                                                                | NICU                                                                                                                              | Descriptive reports from parents | Babylink individual website information                                                           | Parents reported the benefits of having access to information on their baby on a daily basis. BabyLink has been beneficial to families in communicating complex information and humanising the experience of neonatal intensive care.                                                                                                                                                                                                                                                                                                                                                                                                                                                                                                                     | An efficient means of keeping parents informed about the care and progress of their babies being cared for in the hospital's neonatal unit                                                                                                                                                                                                                                                                                                                           | 3 |
| Fenwick, 2001, Australia | Qualitative     | To Gain a greater understanding of the woman's experience of mothering in the nursery and how nurses' social interaction and verbal exchanges impacted on this experience | Special care nursery<br>28 women<br>The average age of the women was 28 years (range 19±41)<br>15 gave birth at 30 weeks or less. | Semi-structured interviews       | None                                                                                              | Nurses engaging in such 'chatting' resulted in the development of relationships that were reciprocal and interdependent rather than undesirable or difficult to achieve. Mothers described this as personal, and forming friendships.<br><br>While women commented that all the facilitative behaviours were important, nurses who 'chatted' in this way were singled out particularly as those that truly made a difference to their nursery experience.<br><br>It was these nurses that all the women in the study identified as the people who 'most' facilitated their efforts to learn and take up their role as mothers, feel in control of the situation and, ultimately, assisted them in developing a connected relationship with their infants. | The results of this study relate to the importance of the shared 'social' interactions between mother and nurse and the role these played in developing 'personal' and 'equal' relationships. This allowed the nurse to enter the woman's world and to facilitate their access to psychosocial information that assisted them in validating the woman's experiences, and helped them to plan individualized care that met the needs of the infant, mother and family | 3 |
| Koh 1998 Australia       | Cross-sectional | To evaluate tape-recording doctor-patient communication                                                                                                                   | NICU<br>80 parents of babies admitted to NICU                                                                                     | Questionnaire                    | Tape recording initial conversation between parents and neonatologist (covering baby's condition, | Parent response rate=76% (75/99). Mothers listened to the tape on average 2.5 times, Fathers listened to the tape on average 1.8 times; tape usefulness rated as 9 (SD: 7-10) by parents. 85% (44/75) of parents who listened to the tapes again found it contained things they had                                                                                                                                                                                                                                                                                                                                                                                                                                                                       | The tape recording of parent-doctor consultations was useful to parents, particularly in reminding them of information they had forgotten or not heard due to anxiety or sedation during the consultation.                                                                                                                                                                                                                                                           | 3 |

1  
2  
3  
4  
5  
6  
7  
8  
9  
10  
11  
12  
13  
14  
15  
16  
17  
18  
19  
20  
21  
22  
23  
24  
25  
26  
27  
28  
29  
30  
31  
32  
33  
34  
35  
36  
37  
38  
39  
40  
41  
42  
43  
44  
45  
46  
47

|  |  |  |  |  |                                                                                                              |                                                                                                                                                                                                                                                             |  |  |
|--|--|--|--|--|--------------------------------------------------------------------------------------------------------------|-------------------------------------------------------------------------------------------------------------------------------------------------------------------------------------------------------------------------------------------------------------|--|--|
|  |  |  |  |  | management, likely progress and outcome) and subsequent important conversations and giving parents the tapes | forgotten – some mothers who had been sedated had forgotten the conversation had taken place. Relatives were also able to listen to tape & saved parents repeating what doctor had said. Parents found tapes comforting & supportive. No negative comments. |  |  |
|--|--|--|--|--|--------------------------------------------------------------------------------------------------------------|-------------------------------------------------------------------------------------------------------------------------------------------------------------------------------------------------------------------------------------------------------------|--|--|

2h) Interventions to improve information needs of parents

| Author (Year) Country | Study design       | Intervention                                                                                                                                                                                                                                                                                              | Outcome measure                                                                                                                                            | No of cases                         | No. of controls | Statistically significant                                                                                                                 | Quality (SIGN) |
|-----------------------|--------------------|-----------------------------------------------------------------------------------------------------------------------------------------------------------------------------------------------------------------------------------------------------------------------------------------------------------|------------------------------------------------------------------------------------------------------------------------------------------------------------|-------------------------------------|-----------------|-------------------------------------------------------------------------------------------------------------------------------------------|----------------|
| Brown 1994 USA        | Quasi experimental | Booklet, videotape and practical session. for parents of broncho-pulmonary dysplasia discharged from tertiary care centre. Education on physical characteristics of infants on continuous low-flow oxygen & their care. Psychosocial development of infant, parental needs, oxygen equipment, CPR in NICU | Pre-test Post-test study<br>Pre-test of knowledge immediately before and post-test immediately after programme; post-test repeated 6 weeks after discharge | 18 primary caregivers of 10 infants |                 | Post-test scores (immediate mean = 17.33 [SD 3.91]; delayed 17.17 [4.41]) significantly higher than pretest scores (14.38 [3.72], p<0.01) | 2+             |

| Author (Year) Country | Study design    | Objective                                                                                                                             | Setting       | Study design/ outcome measures                                                                                    | Intervention | Results                                                                                                                                                                                                                                                                                                                                                                                                                                                           | Authors Conclusions                                                                                                                            | Sign |
|-----------------------|-----------------|---------------------------------------------------------------------------------------------------------------------------------------|---------------|-------------------------------------------------------------------------------------------------------------------|--------------|-------------------------------------------------------------------------------------------------------------------------------------------------------------------------------------------------------------------------------------------------------------------------------------------------------------------------------------------------------------------------------------------------------------------------------------------------------------------|------------------------------------------------------------------------------------------------------------------------------------------------|------|
| Kowalski 2006,        | Cross-sectional | To determine what information is wanted, who provides information and what expectations parents have regarding obtaining information. | Neonatal unit | A 19-item questionnaire was given to the parents of infants 32 weeks or younger prior to discharge from the NICU. | None         | Out of the 101 parents who consented, almost all of the parents (96%) felt that 'the medical team gave them the information they needed about their baby' and that the 'neonatologist did a good job of communicating' with them (91%). However, the nurse was chosen as 'the person who spent the most time explaining the baby's condition', 'the best source of information,' and the person who told them 'about important changes in their baby's condition' | Although the neonatologist's role in parent education is satisfactory, the parents identified the nurses as the primary source of information. | 3    |

1  
2  
3  
4  
5  
6  
7  
8  
9  
10  
11  
12  
13  
14  
15  
16  
17  
18  
19  
20  
21  
22  
23  
24  
25  
26  
27  
28  
29  
30  
31  
32  
33  
34  
35  
36  
37  
38  
39  
40  
41  
42  
43  
44  
45  
46  
47

|                      |             |                                                                               |                                                        |                                                                                                                                         |                                                                                                                                                                                     |                                                                                                                                                                                                                                                                                                                                                                                                                                                                                                                                                                                                                                                                                                                                                                                                                        |                                                                                                                                                                                                          |   |
|----------------------|-------------|-------------------------------------------------------------------------------|--------------------------------------------------------|-----------------------------------------------------------------------------------------------------------------------------------------|-------------------------------------------------------------------------------------------------------------------------------------------------------------------------------------|------------------------------------------------------------------------------------------------------------------------------------------------------------------------------------------------------------------------------------------------------------------------------------------------------------------------------------------------------------------------------------------------------------------------------------------------------------------------------------------------------------------------------------------------------------------------------------------------------------------------------------------------------------------------------------------------------------------------------------------------------------------------------------------------------------------------|----------------------------------------------------------------------------------------------------------------------------------------------------------------------------------------------------------|---|
| Gannon 2000 USA      | Case series | To evaluate 'Caring one day at a time' book                                   | NICU 5 pilot families                                  | Survey                                                                                                                                  | 'Caring one day at a time' book – three-ring binder book to organise information about child's medical, developmental and financial records from birth until adolescence and beyond | Allows parents to keep all information together, speeding up process when they have to see a new doctor for example & giving parents more confidence; allows parent to see child's progress (giving hope); allows new professionals to see history/ current status/ current medication etc written down                                                                                                                                                                                                                                                                                                                                                                                                                                                                                                                | This family-centred approach with early involvement of families in child's care; enhances communication between families and professionals                                                               | 3 |
| Costello 1998 Canada | Qualitative | To assess mothers' perceptions of Care by Parent programme                    | NICU and Level II nursery 6 mothers of preterm infants | Interviews the day after Care by Parent overnight stay in hospital, and when baby home at least 4 days                                  | Care by Parent programme – mother stays with baby in room near NICU – assumes all care but help at hand if needed.                                                                  | Mothers found Care by Parent reassuring to confirm their own and the baby's readiness for discharge; builds confidence in mother's parenting abilities; feeling more comfortable about bringing baby home; feeling confident in taking responsibility, making the right decisions; feeling more secure that mother would wake when baby cried & be able to respond; reassured that baby medically ready to go home (e.g. not having apnoea spells). Helped mothers learn about infant's pattern of behaviour & responses to infant's cues. Fail-safe opportunity; taking responsibility with a safety net. Opportunity to 'test reality' of parenting – feeling more as though the baby belonged to the mother not the nurses; facilitates transition to parenthood in reality; bridges gap between hospital and home. | Care by Parent gave mothers opportunity to assume full responsibility for baby's care knowing that staff available if necessary. It helped mothers learn caregiving and confirm readiness for discharge. | 3 |
| Drake 1995 USA       |             | To assess a method of prioritising information needs of parents for discharge | NICU Pilot study of 10 parents                         | Q-sort – ranking of topics in order of priority to parents for learning prior to discharge; feedback on how easy Q-sort was to complete | Card sort method of prioritising teaching/learning topics that parents need prior to discharge                                                                                      | Parents sorted 14 topics into most important, important, and least important piles and had opportunity to add in 3 other topics they wanted. Parents' highest priorities were infant CPR, illness and development, with feeding, giving medication & hygiene issues medium priority and use of car seat & getting help at home low priorities.                                                                                                                                                                                                                                                                                                                                                                                                                                                                         | Parents are the best sources to assess their learning needs, and addressing topics parents feel are important helps teaching and learning, especially if nurse does not know family well.                |   |

|  |  |  |  |  |  |                                                                                                                                                                                              |  |  |
|--|--|--|--|--|--|----------------------------------------------------------------------------------------------------------------------------------------------------------------------------------------------|--|--|
|  |  |  |  |  |  | Parents and nurses found it helpful to assess what parents needed to know – better than closed questions to parents like 'Do you know how to give the baby a bath?' which can be threatening |  |  |
|--|--|--|--|--|--|----------------------------------------------------------------------------------------------------------------------------------------------------------------------------------------------|--|--|

## 2) Discharge planning

| Author (Year) Country   | Study design | Intervention                                                                                                                                                                                                                                                                                                                                                                                                     | Outcome measure                 | No of cases | No. of controls | Statistically significant                                                                                                                                                                                                                                                                                                                                                                                                                                                                                                                                                                                     | Quality (SIGN) |
|-------------------------|--------------|------------------------------------------------------------------------------------------------------------------------------------------------------------------------------------------------------------------------------------------------------------------------------------------------------------------------------------------------------------------------------------------------------------------|---------------------------------|-------------|-----------------|---------------------------------------------------------------------------------------------------------------------------------------------------------------------------------------------------------------------------------------------------------------------------------------------------------------------------------------------------------------------------------------------------------------------------------------------------------------------------------------------------------------------------------------------------------------------------------------------------------------|----------------|
| Ortenstrand 2001 Sweden | Cohort       | Early discharge with domiciliary nursing care. Domiciliary nurse made an individual care and discharge plan together with the parents. During these planning sessions, parent's knowledge of how to care for their pre-term infant were checked and supplemented. The nurse was available for home visit/ telephone consultation from Monday to Friday, and at weekends parents could contact the neonatal ward. | STAI                            | 40          | 35              | No differences in mothers' Trait anxiety at 1st or 2nd assessment. State (situational) anxiety lower for EDG mothers at 1st assessment (EDG 30.9 [SD 6.2] vs. CG 36.6 [8.4], $p<0.01$ .<br><br>Fathers showed a significant difference in trait anxiety at both 1st and 2nd study time period (30.1 (5.8) vs 33.5 (7.7), $p<0.05$ , but only a significant difference in state anxiety at the 1st assessment (29.5 [5.4] vs 32.8 [9.1], $p<0.08$ .<br><br>At 1 yr, no difference in recollection of anxiety in caring for the infant or in experiences of mental imbalance related to the birth of the infant | 2+             |
| Barrera 1986 Canada     | RCT          | Teaching developmental care                                                                                                                                                                                                                                                                                                                                                                                      | HOME Parent-infant interactions | 40          | 40              | At 4 mths and 16 mths, mothers in the Parent-Infant intervention group and full term control group were significantly better maternal responsiveness and mother-infant interaction compared to the pre-term baby control group.<br><br>Manova:<br>Maternal responsiveness<br>I-7.32, FTC - 7.44, C- 6.41, $f=6.78$ , $p<0.001$<br>Maternal involvement:<br>I=7.23, FTC-7.16, C-6.26, $f=2.70$ , $p<0.05$                                                                                                                                                                                                      | 1-             |

|  |  |  |  |  |  |  |  |
|--|--|--|--|--|--|--|--|
|  |  |  |  |  |  |  |  |
|--|--|--|--|--|--|--|--|

| Author (Year) Country    | Study design | Objective                                                       | Setting                                                | Study design/ outcome measures                                       | Intervention                                                                                                                                                                                                                                                                                                                 | Results                                                                                                                                                                                                                                                                                                                                                                                                                                                                                                                                                                                                                                                                                                                                                                                                                                                                                                                                                 | Authors Conclusions                                                                                                   | Sign |
|--------------------------|--------------|-----------------------------------------------------------------|--------------------------------------------------------|----------------------------------------------------------------------|------------------------------------------------------------------------------------------------------------------------------------------------------------------------------------------------------------------------------------------------------------------------------------------------------------------------------|---------------------------------------------------------------------------------------------------------------------------------------------------------------------------------------------------------------------------------------------------------------------------------------------------------------------------------------------------------------------------------------------------------------------------------------------------------------------------------------------------------------------------------------------------------------------------------------------------------------------------------------------------------------------------------------------------------------------------------------------------------------------------------------------------------------------------------------------------------------------------------------------------------------------------------------------------------|-----------------------------------------------------------------------------------------------------------------------|------|
| Broedsgaard 2005 Denmark | Qualitative  | To present the parents' experiences of an educational programme | NICU<br>37 families with premature infants (<34 weeks) | Descriptive study<br><br>Semi-structured interviews and focus groups | Educational programme (topic group discussions) for parents during hospitalisation; health visitor coordinator on NICU; visit and orientation about NICU for family's health visitor; multidisciplinary discharge conference; booklets for parents and health care providers; parents' evenings once a month after discharge | Families valued support and guidance from coordinator; having named contact nurse throughout child's stay; continuity of care; felt secure when they went home; NICU personnel and own health visitor collaborated well. They received extra visits from health visitor (most 4-6 extra but some >7 extra) in the first year and this was in accordance with their needs. Frustrated that mothers were on postnatal ward with mothers of full-term infants but they were separated from their infants (NICU on another floor). Felt that their needs not met in maternity unit. Felt assisted and reassured in NICU; the parents needed special care to tackle their situation and needed lots of information (repeated several times, plus written materials to reinforce). Discharge was time of anxiety; shock; needed to adjust; return home helped by meeting health visitor on NICU; 3-4 days rooming-in on NICU helped preparing to return home. | Intervention increased support, contributed to confidence in caring for infant and infant well-being after discharge. | 3    |
| Bennett 2005 UK          | Qualitative  | Evaluation of Rooming in (care by parent)                       | NICU                                                   | Interview                                                            | Rooming in (care by parent)                                                                                                                                                                                                                                                                                                  | Most found it an extremely positive experience (scared but realised the opportunity to know each other more, feel a bit more in charge; promoting breastfeeding, increased bonding & confidence to take baby home).                                                                                                                                                                                                                                                                                                                                                                                                                                                                                                                                                                                                                                                                                                                                     | Most mothers reported 'rooming in' to be a useful, informative time                                                   | 3    |
| Jonsson 2003             | Qualitative  | To report on an early                                           | NICU<br>23 parents (17                                 | Interviews                                                           | Home care programme –                                                                                                                                                                                                                                                                                                        | Becoming a family: do not feel like a family in NICU; shared infant with staff;                                                                                                                                                                                                                                                                                                                                                                                                                                                                                                                                                                                                                                                                                                                                                                                                                                                                         | Parents wanted to come home earlier to feel like a family, but wanted security of access to                           | 3    |

1  
2  
3  
4  
5  
6  
7  
8  
9  
10  
11  
12  
13  
14  
15  
16  
17  
18  
19  
20  
21  
22  
23  
24  
25  
26  
27  
28  
29  
30  
31  
32  
33  
34  
35  
36  
37  
38  
39  
40  
41  
42  
43  
44  
45  
46  
47

|                         |  |                                                            |                                                           |                                                                                                        |                                                                                                                    |                                                                                                                                                                                                                                                                                                                                                                                                                                                                                                                                                                                                                                                                                                                                                                                                                        |                                                                                                                                                                                                          |   |
|-------------------------|--|------------------------------------------------------------|-----------------------------------------------------------|--------------------------------------------------------------------------------------------------------|--------------------------------------------------------------------------------------------------------------------|------------------------------------------------------------------------------------------------------------------------------------------------------------------------------------------------------------------------------------------------------------------------------------------------------------------------------------------------------------------------------------------------------------------------------------------------------------------------------------------------------------------------------------------------------------------------------------------------------------------------------------------------------------------------------------------------------------------------------------------------------------------------------------------------------------------------|----------------------------------------------------------------------------------------------------------------------------------------------------------------------------------------------------------|---|
| Sweden                  |  | discharge & home care programme                            | women + 6 men) of babies on home care programme           |                                                                                                        | home visits at parent request (1 day-1 week apart); counselling & supervision                                      | feeling gradually disappeared when they went home.<br>Being at home: nervous; less conflict between being with infant in hospital and being with other children at home<br>Being reunited as a family; not having to share baby with others<br>Feeling security: important for parents to have access to information and advice: checked with checklist with the neonatal nurses; had questions when they got home<br>Needed accessibility, usually by telephone, with home care team<br>Needed support from health care professionals and relatives                                                                                                                                                                                                                                                                   | staff knowledge & support                                                                                                                                                                                |   |
| Costello 1998<br>Canada |  | To assess mothers' perceptions of Care by Parent programme | NICU and Level II nursery<br>6 mothers of preterm infants | Interviews the day after Care by Parent overnight stay in hospital, and when baby home at least 4 days | Care by Parent programme – mother stays with baby in room near NICU – assumes all care but help at hand if needed. | Mothers found Care by Parent reassuring to confirm their own and the baby's readiness for discharge; builds confidence in mother's parenting abilities; feeling more comfortable about bringing baby home; feeling confident in taking responsibility, making the right decisions; feeling more secure that mother would wake when baby cried & be able to respond; reassured that baby medically ready to go home (e.g. not having apnoea spells). Helped mothers learn about infant's pattern of behaviour & responses to infant's cues. Fail-safe opportunity; taking responsibility with a safety net. Opportunity to 'test reality' of parenting – feeling more as though the baby belonged to the mother not the nurses; facilitates transition to parenthood in reality; bridges gap between hospital and home. | Care by Parent gave mothers opportunity to assume full responsibility for baby's care knowing that staff available if necessary. It helped mothers learn caregiving and confirm readiness for discharge. | 3 |

2j) Home Support Programmes

| Author (Year) | Study design | Intervention | Outcome measure | No of cases | No. of controls | Statistically significant | Quality (SIGN) |
|---------------|--------------|--------------|-----------------|-------------|-----------------|---------------------------|----------------|
|---------------|--------------|--------------|-----------------|-------------|-----------------|---------------------------|----------------|

|    |                      |        |                                                                                                                                                                                                                                                                                                                                                                                 |                                                                                                            |        |                      |                                                                                                                                                                                                                                                                                                                                                                                                                                                                                                                                                                                                  |    |
|----|----------------------|--------|---------------------------------------------------------------------------------------------------------------------------------------------------------------------------------------------------------------------------------------------------------------------------------------------------------------------------------------------------------------------------------|------------------------------------------------------------------------------------------------------------|--------|----------------------|--------------------------------------------------------------------------------------------------------------------------------------------------------------------------------------------------------------------------------------------------------------------------------------------------------------------------------------------------------------------------------------------------------------------------------------------------------------------------------------------------------------------------------------------------------------------------------------------------|----|
| 1  |                      |        |                                                                                                                                                                                                                                                                                                                                                                                 |                                                                                                            |        |                      |                                                                                                                                                                                                                                                                                                                                                                                                                                                                                                                                                                                                  |    |
| 2  |                      |        |                                                                                                                                                                                                                                                                                                                                                                                 |                                                                                                            |        |                      |                                                                                                                                                                                                                                                                                                                                                                                                                                                                                                                                                                                                  |    |
| 3  |                      |        |                                                                                                                                                                                                                                                                                                                                                                                 |                                                                                                            |        |                      |                                                                                                                                                                                                                                                                                                                                                                                                                                                                                                                                                                                                  |    |
| 4  |                      |        |                                                                                                                                                                                                                                                                                                                                                                                 |                                                                                                            |        |                      |                                                                                                                                                                                                                                                                                                                                                                                                                                                                                                                                                                                                  |    |
| 5  | <b>Country</b>       |        |                                                                                                                                                                                                                                                                                                                                                                                 |                                                                                                            |        |                      |                                                                                                                                                                                                                                                                                                                                                                                                                                                                                                                                                                                                  |    |
| 6  | Kurz 2002<br>Austria | Cohort | Home support (Phone call and counselling of parents after returning home) for parents of babies with monitors                                                                                                                                                                                                                                                                   | Questionnaire about monitor use, stress reported by monitor use, and satisfaction                          | 90     | 70                   | Home monitoring considered reassuring for 60% of families. After intensive counselling introduced, parents liked the instruction better (74% vs. 44% very satisfied; 24% vs. 51% satisfied; 2% vs. 5% not satisfied, $p<0.005$ ), were less stressed by the monitor (42% vs. 63% stressed by false alarms, $p<0.05$ ) and reacted less aggressively to monitor alarms (8% vs. 24% reacted by vigorously shaking or lifting baby, $p<0.05$ ); used monitor mainly during sleeping periods; used monitor for less time (6.1 months vs. 7.6 months, $p<0.05$ ). Counselling did not reduce anxiety. | 2+ |
| 7  |                      |        |                                                                                                                                                                                                                                                                                                                                                                                 |                                                                                                            |        |                      |                                                                                                                                                                                                                                                                                                                                                                                                                                                                                                                                                                                                  |    |
| 8  |                      |        |                                                                                                                                                                                                                                                                                                                                                                                 |                                                                                                            |        |                      |                                                                                                                                                                                                                                                                                                                                                                                                                                                                                                                                                                                                  |    |
| 9  |                      |        |                                                                                                                                                                                                                                                                                                                                                                                 |                                                                                                            |        |                      |                                                                                                                                                                                                                                                                                                                                                                                                                                                                                                                                                                                                  |    |
| 10 |                      |        |                                                                                                                                                                                                                                                                                                                                                                                 |                                                                                                            |        |                      |                                                                                                                                                                                                                                                                                                                                                                                                                                                                                                                                                                                                  |    |
| 11 |                      |        |                                                                                                                                                                                                                                                                                                                                                                                 |                                                                                                            |        |                      |                                                                                                                                                                                                                                                                                                                                                                                                                                                                                                                                                                                                  |    |
| 12 |                      |        |                                                                                                                                                                                                                                                                                                                                                                                 |                                                                                                            |        |                      |                                                                                                                                                                                                                                                                                                                                                                                                                                                                                                                                                                                                  |    |
| 13 |                      |        |                                                                                                                                                                                                                                                                                                                                                                                 |                                                                                                            |        |                      |                                                                                                                                                                                                                                                                                                                                                                                                                                                                                                                                                                                                  |    |
| 14 | Spiker 1993<br>USA   | RCT    | Home Support (Infant Health and Development Program (IHDP) – Home visits from discharge up to 36 months                                                                                                                                                                                                                                                                         | Quality of assistance in parenting pre-term baby<br>Supportive presence for parents of pre-term infants    | 271    | 412                  | Intervention group reported significantly better quality of assistance ratings than control group (I: 3.6 [1.5], vs 3.3[1.5], $p<0.05$ ), but no significant difference on supportive presence was reported. Most outcomes in this study were baby outcomes.                                                                                                                                                                                                                                                                                                                                     | 1- |
| 15 |                      |        |                                                                                                                                                                                                                                                                                                                                                                                 |                                                                                                            |        |                      |                                                                                                                                                                                                                                                                                                                                                                                                                                                                                                                                                                                                  |    |
| 16 |                      |        |                                                                                                                                                                                                                                                                                                                                                                                 |                                                                                                            |        |                      |                                                                                                                                                                                                                                                                                                                                                                                                                                                                                                                                                                                                  |    |
| 17 |                      |        |                                                                                                                                                                                                                                                                                                                                                                                 |                                                                                                            |        |                      |                                                                                                                                                                                                                                                                                                                                                                                                                                                                                                                                                                                                  |    |
| 18 |                      |        |                                                                                                                                                                                                                                                                                                                                                                                 |                                                                                                            |        |                      |                                                                                                                                                                                                                                                                                                                                                                                                                                                                                                                                                                                                  |    |
| 19 |                      |        |                                                                                                                                                                                                                                                                                                                                                                                 |                                                                                                            |        |                      |                                                                                                                                                                                                                                                                                                                                                                                                                                                                                                                                                                                                  |    |
| 20 |                      |        |                                                                                                                                                                                                                                                                                                                                                                                 |                                                                                                            |        |                      |                                                                                                                                                                                                                                                                                                                                                                                                                                                                                                                                                                                                  |    |
| 21 | Leonard 1989<br>USA  | Cohort | Educational support programme for infants on home monitors (Infant Apnea Evaluation Programmes (IAEP)L<br>Gp1 – with home monitoring<br>Gp2- no home monitoring<br>Gp3 – healthy term babies                                                                                                                                                                                    | Symptom checklist-90, schedule of recent events, satisfaction - all in interview 2 wks after going home    | Gp1-40 | Gp 2- 30<br>Gp3 - 32 | Psychological symptoms highest in parents of non-monitored premature infants (M - 0.2845 [0 - 0.82] vs , NM - 0.4507 [0-1.3], $p=0.037$ ); particularly fathers of non-monitored infants scoring high on depression (0.6846)).<br><br>Support highest in monitored infants ( $p=0.005$ )<br>NS on family satisfaction                                                                                                                                                                                                                                                                            | 2+ |
| 22 |                      |        |                                                                                                                                                                                                                                                                                                                                                                                 |                                                                                                            |        |                      |                                                                                                                                                                                                                                                                                                                                                                                                                                                                                                                                                                                                  |    |
| 23 |                      |        |                                                                                                                                                                                                                                                                                                                                                                                 |                                                                                                            |        |                      |                                                                                                                                                                                                                                                                                                                                                                                                                                                                                                                                                                                                  |    |
| 24 |                      |        |                                                                                                                                                                                                                                                                                                                                                                                 |                                                                                                            |        |                      |                                                                                                                                                                                                                                                                                                                                                                                                                                                                                                                                                                                                  |    |
| 25 |                      |        |                                                                                                                                                                                                                                                                                                                                                                                 |                                                                                                            |        |                      |                                                                                                                                                                                                                                                                                                                                                                                                                                                                                                                                                                                                  |    |
| 26 |                      |        |                                                                                                                                                                                                                                                                                                                                                                                 |                                                                                                            |        |                      |                                                                                                                                                                                                                                                                                                                                                                                                                                                                                                                                                                                                  |    |
| 27 |                      |        |                                                                                                                                                                                                                                                                                                                                                                                 |                                                                                                            |        |                      |                                                                                                                                                                                                                                                                                                                                                                                                                                                                                                                                                                                                  |    |
| 28 |                      |        |                                                                                                                                                                                                                                                                                                                                                                                 |                                                                                                            |        |                      |                                                                                                                                                                                                                                                                                                                                                                                                                                                                                                                                                                                                  |    |
| 29 | Resnick 1988<br>USA  | Cohort | Educational developmental Intervention Programme at home – teach parents to use: parent's voice tape, massage, passive range of motion, exercises) and twice-monthly interventions at home by child development specialists through 12 months adjusted age (e.g. language and social skills enrichment exercises, cognitive development, motor exercises, parenting activities) | Greenspan-Lieberman Observations System (GLOS) to analyse infant-caregiver interactions at 6 and 12 months | 21     | 20                   | Parent child positive verbal scores significantly higher in treatment than control groups (2.91 vs. 2.08), $p=0.02$ .<br>Intervention group dyads had fewer negative verbal interactions (0.07 vs. 0.17, $p=0.03$ ).<br><br>The developmental intervention benefited the quality of the parent-infant interaction at home, as well as benefiting the infant development.                                                                                                                                                                                                                         | 2- |
| 30 |                      |        |                                                                                                                                                                                                                                                                                                                                                                                 |                                                                                                            |        |                      |                                                                                                                                                                                                                                                                                                                                                                                                                                                                                                                                                                                                  |    |
| 31 |                      |        |                                                                                                                                                                                                                                                                                                                                                                                 |                                                                                                            |        |                      |                                                                                                                                                                                                                                                                                                                                                                                                                                                                                                                                                                                                  |    |
| 32 |                      |        |                                                                                                                                                                                                                                                                                                                                                                                 |                                                                                                            |        |                      |                                                                                                                                                                                                                                                                                                                                                                                                                                                                                                                                                                                                  |    |
| 33 |                      |        |                                                                                                                                                                                                                                                                                                                                                                                 |                                                                                                            |        |                      |                                                                                                                                                                                                                                                                                                                                                                                                                                                                                                                                                                                                  |    |
| 34 |                      |        |                                                                                                                                                                                                                                                                                                                                                                                 |                                                                                                            |        |                      |                                                                                                                                                                                                                                                                                                                                                                                                                                                                                                                                                                                                  |    |
| 35 |                      |        |                                                                                                                                                                                                                                                                                                                                                                                 |                                                                                                            |        |                      |                                                                                                                                                                                                                                                                                                                                                                                                                                                                                                                                                                                                  |    |
| 36 |                      |        |                                                                                                                                                                                                                                                                                                                                                                                 |                                                                                                            |        |                      |                                                                                                                                                                                                                                                                                                                                                                                                                                                                                                                                                                                                  |    |
| 37 | Ross 1984<br>USA     | Cohort | Teaching developmental care at home to lower socio-economic parents                                                                                                                                                                                                                                                                                                             | HOME Maternal Attitudes Scale                                                                              | 44     | 40                   | Intervention group reported significantly higher HOME scores (total score 38.4 vs. 34.9, $p<0.001$ ). No other significant differences reported                                                                                                                                                                                                                                                                                                                                                                                                                                                  | 2+ |
| 38 |                      |        |                                                                                                                                                                                                                                                                                                                                                                                 |                                                                                                            |        |                      |                                                                                                                                                                                                                                                                                                                                                                                                                                                                                                                                                                                                  |    |
| 39 |                      |        |                                                                                                                                                                                                                                                                                                                                                                                 |                                                                                                            |        |                      |                                                                                                                                                                                                                                                                                                                                                                                                                                                                                                                                                                                                  |    |
| 40 |                      |        |                                                                                                                                                                                                                                                                                                                                                                                 |                                                                                                            |        |                      |                                                                                                                                                                                                                                                                                                                                                                                                                                                                                                                                                                                                  |    |
| 41 |                      |        |                                                                                                                                                                                                                                                                                                                                                                                 |                                                                                                            |        |                      |                                                                                                                                                                                                                                                                                                                                                                                                                                                                                                                                                                                                  |    |
| 42 |                      |        |                                                                                                                                                                                                                                                                                                                                                                                 |                                                                                                            |        |                      |                                                                                                                                                                                                                                                                                                                                                                                                                                                                                                                                                                                                  |    |
| 43 |                      |        |                                                                                                                                                                                                                                                                                                                                                                                 |                                                                                                            |        |                      |                                                                                                                                                                                                                                                                                                                                                                                                                                                                                                                                                                                                  |    |
| 44 |                      |        |                                                                                                                                                                                                                                                                                                                                                                                 |                                                                                                            |        |                      |                                                                                                                                                                                                                                                                                                                                                                                                                                                                                                                                                                                                  |    |
| 45 |                      |        |                                                                                                                                                                                                                                                                                                                                                                                 |                                                                                                            |        |                      |                                                                                                                                                                                                                                                                                                                                                                                                                                                                                                                                                                                                  |    |
| 46 |                      |        |                                                                                                                                                                                                                                                                                                                                                                                 |                                                                                                            |        |                      |                                                                                                                                                                                                                                                                                                                                                                                                                                                                                                                                                                                                  |    |
| 47 |                      |        |                                                                                                                                                                                                                                                                                                                                                                                 |                                                                                                            |        |                      |                                                                                                                                                                                                                                                                                                                                                                                                                                                                                                                                                                                                  |    |



1  
2  
3  
4  
5  
6  
7  
8  
9  
10  
11  
12  
13  
14  
15  
16  
17  
18  
19  
20  
21  
22  
23  
24  
25  
26  
27  
28  
29  
30  
31  
32  
33  
34  
35  
36  
37  
38  
39  
40  
41  
42  
43  
44  
45  
46  
47

|  |  |  |                                                                                                             |  |  |  |  |
|--|--|--|-------------------------------------------------------------------------------------------------------------|--|--|--|--|
|  |  |  | Maternal developmental Expectations and child rearing attitudes survey<br>Baby outcomes (not reported here) |  |  |  |  |
|--|--|--|-------------------------------------------------------------------------------------------------------------|--|--|--|--|

| Author (Year) Country | Study design          | Objective                                               | Setting                                                    | Study design/ outcome measures         | Intervention                                                                                                                                | Results                                                                                                                                                                                                                                                                                                                                                                                                                        | Authors Conclusions                                                                                                                     | Sign |
|-----------------------|-----------------------|---------------------------------------------------------|------------------------------------------------------------|----------------------------------------|---------------------------------------------------------------------------------------------------------------------------------------------|--------------------------------------------------------------------------------------------------------------------------------------------------------------------------------------------------------------------------------------------------------------------------------------------------------------------------------------------------------------------------------------------------------------------------------|-----------------------------------------------------------------------------------------------------------------------------------------|------|
| Langley 1999 UK       | Cross-sectional study | To evaluate a home support - Community Neonatal Service | Home                                                       | Questionnaire developed for this study | Home support programme                                                                                                                      | Families reported feeling supported, and appreciated continuity of care after discharge. This benefit was reported more in vulnerable parents (isolated mothers, mothers with babies who had sleeping, crying or feeding problems).                                                                                                                                                                                            | Community Neonatal Service provided important support to families where mothers are vulnerable, or where infant has difficulties.       | 3    |
| Swanson 1997 USA      | Case series           | Evaluation of neonatal integrated home care program     | NICU/ home                                                 | Descriptive                            | Neonatal integrated Home Care Program – follow up care to high risk neonates at home, teaching re specific infant care needs (e.g. feeding) | Program made it possible to bring home baby, nurse provided help, support, instruction & encouragement (e.g. with nasogastric feeding tube)                                                                                                                                                                                                                                                                                    | Families supported to take high risk infants home sooner, ease transition from NICU to home & keep them home (i.e. reduce readmissions) | 3    |
| Isaacs 1980 USA       | Case series           | Evaluation of newborn Intensive Care Coordinator        | Home 40 families of high-risk infants discharged from NICU | Questionnaire                          | Home visits for teaching, guidance and support                                                                                              | More than 2/3 parents felt concerned about infant discharge and had anxiety about caring for infant at home. All families strongly agreed that the coordinator made families feel completely comfortable, they had complete trust in her, she was available, she gave emotional support, felt they could discuss fear & worries with her, and helped them mother infant. Teaching gave support, confidence & necessary skills. | Coordinator met the needs of parents                                                                                                    | 3    |

1  
2  
3  
4  
5  
6  
7  
8  
9  
10  
11  
12  
13  
14  
15  
16  
17  
18  
19  
20  
21  
22  
23  
24  
25  
26  
27  
28  
29  
30  
31  
32  
33  
34  
35  
36  
37  
38  
39  
40  
41  
42  
43  
44  
45  
46  
47

For peer review only

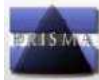

# PRISMA 2009 Checklist

| Section/topic                      | #  | Checklist item                                                                                                                                                                                                                                                                                              | Reported on page #           |
|------------------------------------|----|-------------------------------------------------------------------------------------------------------------------------------------------------------------------------------------------------------------------------------------------------------------------------------------------------------------|------------------------------|
| <b>TITLE</b>                       |    |                                                                                                                                                                                                                                                                                                             |                              |
| Title                              | 1  | Identify the report as a systematic review, meta-analysis, or both.                                                                                                                                                                                                                                         | 1                            |
| <b>ABSTRACT</b>                    |    |                                                                                                                                                                                                                                                                                                             |                              |
| Structured summary                 | 2  | Provide a structured summary including, as applicable: background; objectives; data sources; study eligibility criteria, participants, and interventions; study appraisal and synthesis methods; results; limitations; conclusions and implications of key findings; systematic review registration number. | 2,3,4,5                      |
| <b>INTRODUCTION</b>                |    |                                                                                                                                                                                                                                                                                                             |                              |
| Rationale                          | 3  | Describe the rationale for the review in the context of what is already known.                                                                                                                                                                                                                              | 6                            |
| Objectives                         | 4  | Provide an explicit statement of questions being addressed with reference to participants, interventions, comparisons, outcomes, and study design (PICOS).                                                                                                                                                  | 6                            |
| <b>METHODS</b>                     |    |                                                                                                                                                                                                                                                                                                             |                              |
| Protocol and registration          | 5  | Indicate if a review protocol exists, if and where it can be accessed (e.g., Web address), and, if available, provide registration information including registration number.                                                                                                                               | www.poppy-project.org.uk     |
| Eligibility criteria               | 6  | Specify study characteristics (e.g., PICOS, length of follow-up) and report characteristics (e.g., years considered, language, publication status) used as criteria for eligibility, giving rationale.                                                                                                      | 7                            |
| Information sources                | 7  | Describe all information sources (e.g., databases with dates of coverage, contact with study authors to identify additional studies) in the search and date last searched.                                                                                                                                  | 7                            |
| Search                             | 8  | Present full electronic search strategy for at least one database, including any limits used, such that it could be repeated.                                                                                                                                                                               | Appendix 1                   |
| Study selection                    | 9  | State the process for selecting studies (i.e., screening, eligibility, included in systematic review, and, if applicable, included in the meta-analysis).                                                                                                                                                   | 7                            |
| Data collection process            | 10 | Describe method of data extraction from reports (e.g., piloted forms, independently, in duplicate) and any processes for obtaining and confirming data from investigators.                                                                                                                                  | 7                            |
| Data items                         | 11 | List and define all variables for which data were sought (e.g., PICOS, funding sources) and any assumptions and simplifications made.                                                                                                                                                                       | 7                            |
| Risk of bias in individual studies | 12 | Describe methods used for assessing risk of bias of individual studies (including specification of whether this was done at the study or outcome level), and how this information is to be used in any data synthesis.                                                                                      | N/A Few quantitative studies |
| Summary measures                   | 13 | State the principal summary measures (e.g., risk ratio, difference in means).                                                                                                                                                                                                                               | N/A Few quantitative         |

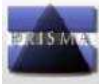

# PRISMA 2009 Checklist

|                      |    |                                                                                                                                                           |         |
|----------------------|----|-----------------------------------------------------------------------------------------------------------------------------------------------------------|---------|
|                      |    |                                                                                                                                                           | studies |
| Synthesis of results | 14 | Describe the methods of handling data and combining results of studies, if done, including measures of consistency (e.g., $I^2$ ) for each meta-analysis. | 7       |

Page 1 of 2

| Section/topic                 | #  | Checklist item                                                                                                                                                                                           | Reported on page #                      |
|-------------------------------|----|----------------------------------------------------------------------------------------------------------------------------------------------------------------------------------------------------------|-----------------------------------------|
| Risk of bias across studies   | 15 | Specify any assessment of risk of bias that may affect the cumulative evidence (e.g., publication bias, selective reporting within studies).                                                             |                                         |
| Additional analyses           | 16 | Describe methods of additional analyses (e.g., sensitivity or subgroup analyses, meta-regression), if done, indicating which were pre-specified.                                                         | Few quantitative studies                |
| <b>RESULTS</b>                |    |                                                                                                                                                                                                          |                                         |
| Study selection               | 17 | Give numbers of studies screened, assessed for eligibility, and included in the review, with reasons for exclusions at each stage, ideally with a flow diagram.                                          | 8                                       |
| Study characteristics         | 18 | For each study, present characteristics for which data were extracted (e.g., study size, PICOS, follow-up period) and provide the citations.                                                             | Table 1                                 |
| Risk of bias within studies   | 19 | Present data on risk of bias of each study and, if available, any outcome level assessment (see item 12).                                                                                                | Discussed in limitations                |
| Results of individual studies | 20 | For all outcomes considered (benefits or harms), present, for each study: (a) simple summary data for each intervention group (b) effect estimates and confidence intervals, ideally with a forest plot. | 18-31                                   |
| Synthesis of results          | 21 | Present results of each meta-analysis done, including confidence intervals and measures of consistency.                                                                                                  | N/A Non-quantitative analysis performed |
| Risk of bias across studies   | 22 | Present results of any assessment of risk of bias across studies (see Item 15).                                                                                                                          | N/A                                     |
| Additional analysis           | 23 | Give results of additional analyses, if done (e.g., sensitivity or subgroup analyses, meta-regression [see Item 16]).                                                                                    | N/A                                     |
| <b>DISCUSSION</b>             |    |                                                                                                                                                                                                          |                                         |
| Summary of evidence           | 24 | Summarize the main findings including the strength of evidence for each main outcome; consider their relevance to key groups (e.g., healthcare providers, users, and policy makers).                     | 30-32                                   |
| Limitations                   | 25 | Discuss limitations at study and outcome level (e.g., risk of bias), and at review-level (e.g., incomplete retrieval of identified research, reporting bias).                                            | 31                                      |

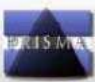

# PRISMA 2009 Checklist

1  
2  
3  
4  
5  
6  
7  
8  
9  
10  
11  
12  
13  
14  
15  
16  
17  
18  
19  
20  
21  
22  
23  
24  
25  
26  
27  
28  
29  
30  
31  
32  
33  
34  
35  
36  
37  
38  
39  
40  
41  
42  
43  
44  
45  
46  
47  
48  
49

|                |    |                                                                                                                                            |             |
|----------------|----|--------------------------------------------------------------------------------------------------------------------------------------------|-------------|
| Conclusions    | 26 | Provide a general interpretation of the results in the context of other evidence, and implications for future research.                    | 32          |
| <b>FUNDING</b> |    |                                                                                                                                            |             |
| Funding        | 27 | Describe sources of funding for the systematic review and other support (e.g., supply of data); role of funders for the systematic review. | Big Lottery |

From: Moher D, Liberati A, Tetzlaff J, Altman DG, The PRISMA Group (2009). Preferred Reporting Items for Systematic Reviews and Meta-Analyses: The PRISMA Statement. PLoS Med 6(6): e1000097. doi:10.1371/journal.pmed1000097

For more information, visit: [www.prisma-statement.org](http://www.prisma-statement.org).

Page 2 of 2

Figure 1. Results from the literature search.

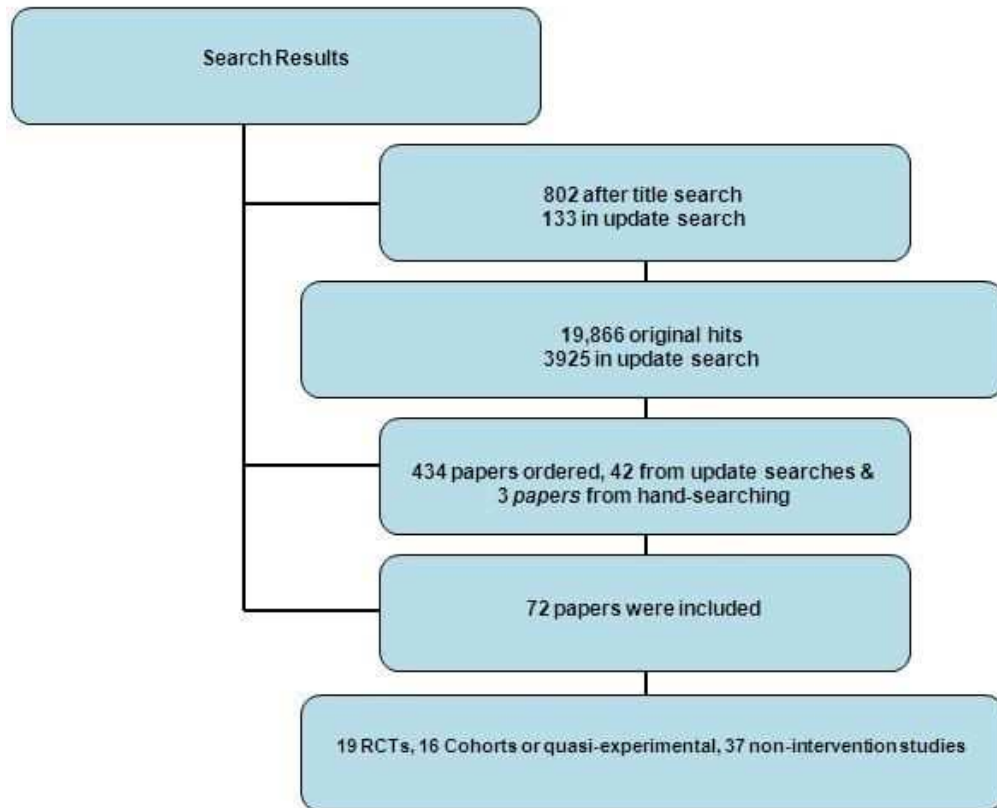

49x44mm (300 x 300 DPI)

1  
2  
3  
4  
5  
6  
7  
8  
9  
10  
11  
12  
13  
14  
15  
16  
17  
18  
19  
20  
21  
22  
23  
24  
25  
26  
27  
28  
29  
30  
31  
32  
33  
34  
35  
36  
37  
38  
39  
40  
41  
42  
43  
44  
45  
46  
47  
48  
49

**Support Groups**

- Parent lead (buddy parent programme)(2++)
- Nurse lead (3)

**Improve Communication**

- Record consultations with doctors (or provide results in writing) (1++)
- Involve Parents in discussions around Infant Progress Chart (2++)
- Video-phone link to unit (2-)
- Baby Link - website information - general and specific to parents (3)

**Individualised developmental and care Programmes**

- COPE (Creating opportunities for Parent empowerment)(1+)
- NIDCAP (Neonatal individualised Developmental Care and Assessment Programme) (1+)
- Mother - Infant Transaction Programme (1+)

**Stress Education Programme**

- COPE (Creating opportunities for Parent empowerment) (1+)
- NIDCAP (Neonatal individualised Developmental Care and Assessment Programme) (1+)
- Mother - Infant Transaction Programme (1+)
- Video tape training: active problem solving focussed coping strategy (1+)
- One off stress reduction programme (2+)

**Care for babies**

- Kangaroo care (1+)
- Baby massage (1+)
- Breast feeding (3)

(ie to improve confidence and competence in caring and

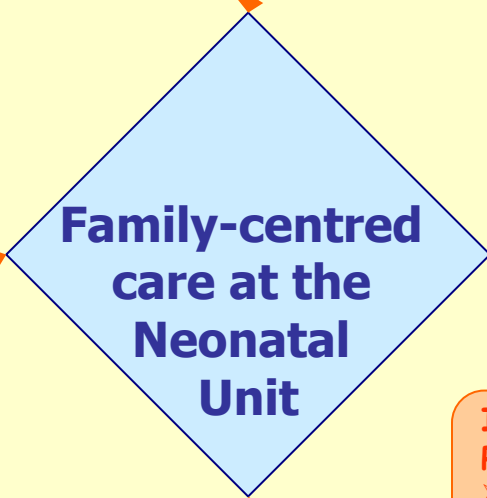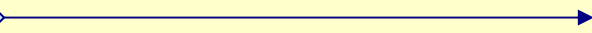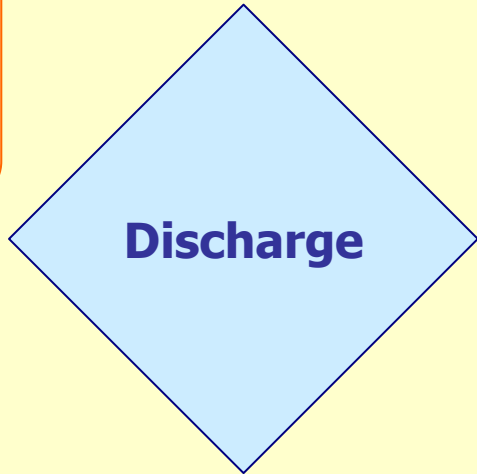

- Discharge**
- (Reduced...  
impro...  
impro...)
1. Parent... (to i...  
inter...  
hom...)
  2. Educa...  
Parent...  
from...  
the...  
cross...  
cont...  
appr...  
for...)
  3. Earl...  
nurs...)
  4. Care...  
stay...  
in th...  
care...  
avail...

1  
2  
3  
4  
5  
6  
7 **Figure 3. Individualised developmental and behavioural care**  
8 **programmes**  
9

10  
11  
12 1) COPE(4) (Creating Opportunities for Parent Empowerment) provides an educational  
13 programme for parents at the neonatal unit on the appearance and behavioural  
14 characteristics of pre-term infants, how parents can participate in their infant's care, and  
15 how parents can make more positive interactions with their infant.  
16

17  
18 2) NIDCAP(11,12,13) (Neonatal Individualised Developmental Care and Assessment  
19 Programme) is an intervention that stimulates pre-term infants and improves the  
20 interaction between mothers and infants

21  
22 3) MITP (Mother-Infant Transaction Programme) (14,15,16) helps to enable the parents to  
23 appreciate their infant's unique characteristics, temperament, and developmental  
24 potential, sensitising parents to their infant's cues so that they can respond appropriately.

25  
26 4) NCATS (Nursing Child Assessment Teaching Scale) NCATS (Nursing Child Assessment  
27 Teaching Scale) (17) : Examines the mother-child relationship in conjunction with teaching  
28 mothers how to interact with the baby, teaching behavioural cues, how to play etc

29  
30 **NB:** While the developmental care programmes are designed to improve the development  
31 of the baby, these interventions give parents psychological support and practical guidance  
32 on how to care for their infants  
33

34  
35 52x43mm (300 x 300 DPI)  
36  
37  
38  
39  
40  
41  
42  
43  
44  
45  
46  
47  
48  
49  
50  
51  
52  
53  
54  
55  
56  
57  
58  
59  
60



Figure 4

## Scottish Intercollegiate Guideline Network (SIGN) Levels of Evidence

|     |                                                                                                                                                          |
|-----|----------------------------------------------------------------------------------------------------------------------------------------------------------|
| 1++ | High quality meta analysis, systematic reviews of RCTs, or RCTs with very low risk of bias                                                               |
| 1+  | Well conducted meta-analysis, systematic review of RCTs or RCTs with low risk of bias                                                                    |
| 1-  | Meta analyses, systematic reviews of RCTs, or RCTs with high risk of bias                                                                                |
| 2++ | High quality systematic reviews of case-control or cohort studies                                                                                        |
| 2+  | High quality case-control studies with a very low risk of confounding bias, or chance and a high probability that the relationship is causal             |
| 2-  | Well conducted case control or cohort studies with a low risk of confounding, bias, or chance and a moderate probability that the relationship is causal |
| 3   | Case control or cohort studies with high risk of confounding, bias, or chance and a significant risk that the relationship is not causal                 |
| 3   | Non-analytical studies, e.g. case series, case reports, qualitative                                                                                      |
| 4   | Expert opinion                                                                                                                                           |

55x59mm (300 x 300 DPI)

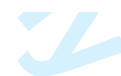

Supplement: bmjopen-2010-000023.draft_revisions.pdf [file bmjopen-2010-000023.draft_revisions.pdf]
