# Supplementary material for: A systematic mapping review of effective interventions for communicating with, supporting and providing information to parents of preterm infants
Source: PubMed Central journal article supplement — BMJ Open. 2011 Jun 2;1(1):e000023. doi: 10.1136/bmjopen-2010-000023 (PMC3191395; doi:10.1136/bmjopen-2010-000023), 2011-06-02
Supplement: bmjopen-2010-000023-s2.pdf [file bmjopen-2010-000023-s2.pdf]

**Table 1: Search terms**

|                                                                             |                                                                                                                                                                                                                                                                                                                                                                                                                                                                                                                                                                                                                                                                                                                                                                                                                                                                                                                                                                                                                                                                                                                                                                                                                                                                                                                                                                                                                                                                                                                                                                                                                                                                                                                                                                                                                  |
|-----------------------------------------------------------------------------|------------------------------------------------------------------------------------------------------------------------------------------------------------------------------------------------------------------------------------------------------------------------------------------------------------------------------------------------------------------------------------------------------------------------------------------------------------------------------------------------------------------------------------------------------------------------------------------------------------------------------------------------------------------------------------------------------------------------------------------------------------------------------------------------------------------------------------------------------------------------------------------------------------------------------------------------------------------------------------------------------------------------------------------------------------------------------------------------------------------------------------------------------------------------------------------------------------------------------------------------------------------------------------------------------------------------------------------------------------------------------------------------------------------------------------------------------------------------------------------------------------------------------------------------------------------------------------------------------------------------------------------------------------------------------------------------------------------------------------------------------------------------------------------------------------------|
| <p>INTERVENTION MEDLINE 1951-2006</p> <p>Search carried out 23 JAN 2006</p> |   <ol style="list-style-type: none"><li>1. SEARCH: INFORMATION-DISSEMINATION#.DE.</li><li>2. SEARCH: INFORMATION OR INFORM\$ OR INFORMATION ADJ SEEKING ADJ BEHAVIOUR OR INFORMATION ADJ NEEDS OR PATIENT ADJ INFORMATION OR (PARENT ADJ INFORMATION).AB.</li><li>3. SEARCH: ACCESS-TO-INFORMATION#.DE.</li><li>4. SEARCH: (INFORMATION ADJ RESOURCES).AB.</li><li>5. SEARCH: PATIENT-EDUCATION#.DE. OR PATIENT-EDUCATION-HANDOUT-PUBLICATION-TYPE#.DE.</li><li>6. SEARCH: PATIENT-CARE-TEAM#.DE.</li><li>7. SEARCH: COLLABORATI\$ OR JOINT ADJ WORKING OR TEAM.AB.</li><li>8. SEARCH: COMMUNICATION#.W..DE. OR COMMUNICATION-BARRIERS#.DE.</li><li>9. SEARCH: COMMUNICATION.AB.</li><li>10. SEARCH: (INFORMATION ADJ SERVICE).AB.</li><li>11. SEARCH: EARLY-INTERVENTION-EDUCATION#.DE.</li><li>12. SEARCH: SELF-HELP-GROUPS#.DE.</li><li>13. SEARCH: SOCIAL-SUPPORT#.DE.</li><li>14. SEARCH: HELPING-BEHAVIOR#.DE.</li><li>15. SEARCH: HELP ADJ SEEKING ADJ BEHAVIOUR OR HELP.AB.</li><li>16. SEARCH: SELF ADJ HELP OR (SELF ADJ HELP ADJ GROUPS).AB.</li><li>17. SEARCH: ADVICE OR ADVISE OR ADVISORY.AB.</li><li>18. SEARCH: INTERNET#.W..DE.</li><li>19. SEARCH: COUNSELING#.W..DE. OR DIRECTIVE-COUNSELING#.DE.</li><li>20. SEARCH: COGNITIVE-THERAPY#.DE. OR THERAPY-COMPUTER-ASSISTED#.DE. OR NONDIRECTIVE-THERAPY#.DE.</li><li>21. SEARCH: PSYCHOTHERAPY#.W..DE. OR PSYCHOTHERAPY-BRIEF#.DE.</li><li>22. SEARCH: INTERNET OR WEB OR COUNSELING OR THERAP\$ OR PYSCHOTHERAPY.AB.</li><li>23. SEARCH: HEALTH-EDUCATION#.DE.</li><li>24. SEARCH: HEALTH ADJ EDUCATION OR PATIENT ADJ EDUCATION OR (PARENT\$ ADJ EDUCATION).AB.</li></ol> |
|-----------------------------------------------------------------------------|------------------------------------------------------------------------------------------------------------------------------------------------------------------------------------------------------------------------------------------------------------------------------------------------------------------------------------------------------------------------------------------------------------------------------------------------------------------------------------------------------------------------------------------------------------------------------------------------------------------------------------------------------------------------------------------------------------------------------------------------------------------------------------------------------------------------------------------------------------------------------------------------------------------------------------------------------------------------------------------------------------------------------------------------------------------------------------------------------------------------------------------------------------------------------------------------------------------------------------------------------------------------------------------------------------------------------------------------------------------------------------------------------------------------------------------------------------------------------------------------------------------------------------------------------------------------------------------------------------------------------------------------------------------------------------------------------------------------------------------------------------------------------------------------------------------|

25. SEARCH: HEALTH ADJ EDUCATION OR PATIENT ADJ EDUCATION OR PARENT ADJ EDUCATION OR PARENTAL ADJ EDUCATION OR (PARENTS ADJ EDUCATION).AB.
26. SEARCH: MEETING OR VISIT OR OUTREACH OR OUTPATIENT OR TALK OR TRAINING OR LECTURE OR GUIDE OR GUIDANCE.AB.
27. SEARCH: LEAFLET OR BOOKLET OR POSTER OR PAMPHLET OR INFORMATION ADJ SHEET OR FREQUENTLY ADJ ASKED ADJ QUESTIONS OR DVD OR CD OR VIDEO OR CDROM OR COMPUTER.AB.
28. SEARCH: RESOURCE-GUIDES-PUBLICATION-TYPE#.DE.
29. SEARCH: AUDIOVISUAL-AIDS#.DE.
30. SEARCH: EDUCATIONAL-TECHNOLOGY#.DE.
31. SEARCH: 1 OR 2 OR 3 OR 4 OR 5 OR 6 OR 7 OR 8 OR 9 OR 10 OR 11 OR 12 OR 13 OR 14 OR 15 OR 16 OR 17 OR 18 OR 19 OR 20 OR 21 OR 22 OR 23 OR 24 OR 25 OR 26 OR 27 OR 28 OR 29 OR 30
32. SEARCH: COMMUNITY-INSTITUTIONAL-RELATIONS#.DE.
33. SEARCH: (HOME ADJ VISIT).AB.
34. SEARCH: GUIDE OR GUIDANCE.AB.
35. SEARCH: 32 OR 33 OR 34
36. SEARCH: 31 OR 35
37. SEARCH: INFANT-PREMATURE#.DE.
38. SEARCH: INFANT-LOW-BIRTH-WEIGHT#.DE.
39. SEARCH: INFANT-VERY-LOW-BIRTH-WEIGHT#.DE.
40. SEARCH: INTENSIVE-CARE-NEONATAL#.DE.
41. SEARCH: INTENSIVE-CARE-UNITS-NEONATAL#.DE.
42. SEARCH: (SPECIAL ADJ CARE ADJ BABY ADJ UNIT).AB.
43. SEARCH: SPECIAL ADJ CARE NEAR BABY.AB.
44. SEARCH: (PRETERM OR PREMATURE) NEAR (BABY OR BIRTH OR INFANT OR CHILD).AB.
45. SEARCH: EARLY NEAR (BABY OR BIRTH OR INFANT OR CHILD).AB.
46. SEARCH: 37 OR 38 OR 39 OR 40 OR 41 OR 42 OR 43 OR 44 OR 45
47. SEARCH: 36 AND 46
48. SEARCH: PARENTS#.W..DE.
49. SEARCH: MOTHERS#.W..DE.

- |  |                                                                                                                                                                                                                                                                                                                                                                                                                                                                                                                                                                                                                                                                                                                                               |
|--|-----------------------------------------------------------------------------------------------------------------------------------------------------------------------------------------------------------------------------------------------------------------------------------------------------------------------------------------------------------------------------------------------------------------------------------------------------------------------------------------------------------------------------------------------------------------------------------------------------------------------------------------------------------------------------------------------------------------------------------------------|
|  | <p>50. SEARCH: FATHERS#.W..DE.</p> <p>51. SEARCH: CAREGIVERS#.W..DE.</p> <p>52. SEARCH: MATERNITY NEXT PATIENT</p> <p>53. SEARCH: FAMILY.AB.</p> <p>54. SEARCH: 48 OR 49 OR 50 OR 51 OR 52 OR 53</p> <p>55. SEARCH: 47 AND 54</p> <p>56. SEARCH: 48 OR 49 OR 50 OR 51 OR 52</p> <p>57. SEARCH: INFORMATION OR INFORM\$ OR<br/>INFORMATION ADJ SEEKING ADJ<br/>BEHAVIOUR OR INFORMATION ADJ<br/>NEEDS OR (PARENT ADJ<br/>INFORMATION).AB.</p> <p>58. SEARCH: INFORMATION OR INFORM.AB.</p> <p>59. SEARCH: 1 OR 3 OR 4 OR 5 OR 6 OR 7 OR 8<br/>OR 9 OR 10 OR 11 OR 12 OR 13 OR<br/>14 OR 15 OR 16 OR 17 OR 18 OR 19<br/>OR 20 OR 21 OR 22 OR 23 OR 24 OR<br/>25 OR 26 OR 27 OR 28 OR 29 OR 30<br/>OR 58</p> <p>60. SEARCH: 46 AND 56 AND 59</p> |
|--|-----------------------------------------------------------------------------------------------------------------------------------------------------------------------------------------------------------------------------------------------------------------------------------------------------------------------------------------------------------------------------------------------------------------------------------------------------------------------------------------------------------------------------------------------------------------------------------------------------------------------------------------------------------------------------------------------------------------------------------------------|
