# Supplementary material for: A systematic mapping review of effective interventions for communicating with, supporting and providing information to parents of preterm infants
Source: PubMed Central journal article supplement — BMJ Open. 2011 Jun 2;1(1):e000023. doi: 10.1136/bmjopen-2010-000023 (PMC3191395; doi:10.1136/bmjopen-2010-000023), 2011-06-02
Supplement: bmjopen-2010-000023-s3.pdf [file bmjopen-2010-000023-s3.pdf]

## Appendix 1

## Search strategies for Electronic Databases

### I. Medline

INTERVENTION  
MEDLINE 1951-2006

Search carried out 23  
JAN 2006

1. SEARCH: INFORMATION-DISSEMINATION#.DE.
2. SEARCH: INFORMATION OR INFORM\$ OR INFORMATION ADJ SEEKING ADJ BEHAVIOUR OR INFORMATION ADJ NEEDS OR PATIENT ADJ INFORMATION OR (PARENT ADJ INFORMATION).AB.
3. SEARCH: ACCESS-TO-INFORMATION#.DE.
4. SEARCH: (INFORMATION ADJ RESOURCES).AB.
5. SEARCH: PATIENT-EDUCATION#.DE. OR PATIENT-EDUCATION-HANDOUT-PUBLICATION-TYPE#.DE.
6. SEARCH: PATIENT-CARE-TEAM#.DE.
7. SEARCH: COLLABORATI\$ OR JOINT ADJ WORKING OR TEAM.AB.
8. SEARCH: COMMUNICATION#.W..DE. OR COMMUNICATION-BARRIERS#.DE.
9. SEARCH: COMMUNICATION.AB.
10. SEARCH: (INFORMATION ADJ SERVICE).AB.
11. SEARCH: EARLY-INTERVENTION-EDUCATION#.DE.
12. SEARCH: SELF-HELP-GROUPS#.DE.
13. SEARCH: SOCIAL-SUPPORT#.DE.
14. SEARCH: HELPING-BEHAVIOR#.DE.
15. SEARCH: HELP ADJ SEEKING ADJ BEHAVIOUR OR HELP.AB.
16. SEARCH: SELF ADJ HELP OR (SELF ADJ HELP ADJ GROUPS).AB.
17. SEARCH: ADVICE OR ADVISE OR ADVISORY.AB.
18. SEARCH: INTERNET#.W..DE.
19. SEARCH: COUNSELING#.W..DE. OR DIRECTIVE-COUNSELING#.DE.
20. SEARCH: COGNITIVE-THERAPY#.DE. OR THERAPY-COMPUTER-ASSISTED#.DE. OR NONDIRECTIVE-THERAPY#.DE.

21. SEARCH: PSYCHOTHERAPY#.W..DE. OR PSYCHOTHERAPY-BRIEF#.DE.
22. SEARCH: INTERNET OR WEB OR COUNSELING OR THERAP\$ OR PYSCHOTHERAPY.AB.
23. SEARCH: HEALTH-EDUCATION#.DE.
24. SEARCH: HEALTH ADJ EDUCATION OR PATIENT ADJ EDUCATION OR (PARENT\$ ADJ EDUCATION).AB.
25. SEARCH: HEALTH ADJ EDUCATION OR PATIENT ADJ EDUCATION OR PARENT ADJ EDUCATION OR PARENTAL ADJ EDUCATION OR (PARENTS ADJ EDUCATION).AB.
26. SEARCH: MEETING OR VISIT OR OUTREACH OR OUTPATIENT OR TALK OR TRAINING OR LECTURE OR GUIDE OR GUIDANCE.AB.
27. SEARCH: LEAFLET OR BOOKLET OR POSTER OR PAMPHLET OR INFORMATION ADJ SHEET OR FREQUENTLY ADJ ASKED ADJ QUESTIONS OR DVD OR CD OR VIDEO OR CDROM OR COMPUTER.AB.
28. SEARCH: RESOURCE-GUIDES-PUBLICATION-TYPE#.DE.
29. SEARCH: AUDIOVISUAL-AIDS#.DE.
30. SEARCH: EDUCATIONAL-TECHNOLOGY#.DE.
31. SEARCH: 1 OR 2 OR 3 OR 4 OR 5 OR 6 OR 7 OR 8 OR 9 OR 10 OR 11 OR 12 OR 13 OR 14 OR 15 OR 16 OR 17 OR 18 OR 19 OR 20 OR 21 OR 22 OR 23 OR 24 OR 25 OR 26 OR 27 OR 28 OR 29 OR 30
32. SEARCH: COMMUNITY-INSTITUTIONAL-RELATIONS#.DE.
33. SEARCH: (HOME ADJ VISIT).AB.
34. SEARCH: GUIDE OR GUIDANCE.AB.
35. SEARCH: 32 OR 33 OR 34
36. SEARCH: 31 OR 35
37. SEARCH: INFANT-PREMATURE#.DE.
38. SEARCH: INFANT-LOW-BIRTH-WEIGHT#.DE.
39. SEARCH: INFANT-VERY-LOW-BIRTH-WEIGHT#.DE.
40. SEARCH: INTENSIVE-CARE-NEONATAL#.DE.
41. SEARCH: INTENSIVE-CARE-UNITS-NEONATAL#.DE.
42. SEARCH: (SPECIAL ADJ CARE ADJ BABY ADJ UNIT).AB.

|  |  |                                                                                                                                                                                                                                                                                                                                                                                                                                                                                                                                                                                                                                                                                                                                                                                                                                                                                                                                                                                                                                                                                                 |
|--|--|-------------------------------------------------------------------------------------------------------------------------------------------------------------------------------------------------------------------------------------------------------------------------------------------------------------------------------------------------------------------------------------------------------------------------------------------------------------------------------------------------------------------------------------------------------------------------------------------------------------------------------------------------------------------------------------------------------------------------------------------------------------------------------------------------------------------------------------------------------------------------------------------------------------------------------------------------------------------------------------------------------------------------------------------------------------------------------------------------|
|  |  | <p>43. SEARCH: SPECIAL ADJ CARE NEAR BABY.AB.</p> <p>44. SEARCH: (PRETERM OR PREMATURE) NEAR (BABY OR BIRTH OR INFANT OR CHILD).AB.</p> <p>45. SEARCH: EARLY NEAR (BABY OR BIRTH OR INFANT OR CHILD).AB.</p> <p>46. SEARCH: 37 OR 38 OR 39 OR 40 OR 41 OR 42 OR 43 OR 44 OR 45</p> <p>47. SEARCH: 36 AND 46</p> <p>48. SEARCH: PARENTS#.W..DE.</p> <p>49. SEARCH: MOTHERS#.W..DE.</p> <p>50. SEARCH: FATHERS#.W..DE.</p> <p>51. SEARCH: CAREGIVERS#.W..DE.</p> <p>52. SEARCH: MATERNITY NEXT PATIENT</p> <p>53. SEARCH: FAMILY.AB.</p> <p>54. SEARCH: 48 OR 49 OR 50 OR 51 OR 52 OR 53</p> <p>55. SEARCH: 47 AND 54</p> <p>56. SEARCH: 48 OR 49 OR 50 OR 51 OR 52</p> <p>57. SEARCH: INFORMATION OR INFORM\$ OR INFORMATION ADJ SEEKING ADJ BEHAVIOUR OR INFORMATION ADJ NEEDS OR (PARENT ADJ INFORMATION).AB.</p> <p>58. SEARCH: INFORMATION OR INFORM.AB.</p> <p>59. SEARCH: 1 OR 3 OR 4 OR 5 OR 6 OR 7 OR 8 OR 9 OR 10 OR 11 OR 12 OR 13 OR 14 OR 15 OR 16 OR 17 OR 18 OR 19 OR 20 OR 21 OR 22 OR 23 OR 24 OR 25 OR 26 OR 27 OR 28 OR 29 OR 30 OR 58</p> <p>60. SEARCH: 46 AND 56 AND 59</p> |
|--|--|-------------------------------------------------------------------------------------------------------------------------------------------------------------------------------------------------------------------------------------------------------------------------------------------------------------------------------------------------------------------------------------------------------------------------------------------------------------------------------------------------------------------------------------------------------------------------------------------------------------------------------------------------------------------------------------------------------------------------------------------------------------------------------------------------------------------------------------------------------------------------------------------------------------------------------------------------------------------------------------------------------------------------------------------------------------------------------------------------|

## II. CINAHL

|                                               |                                                                                     |                                                                                                                                                                                                                                                                                                               |
|-----------------------------------------------|-------------------------------------------------------------------------------------|---------------------------------------------------------------------------------------------------------------------------------------------------------------------------------------------------------------------------------------------------------------------------------------------------------------|
| <p>SUPPORT INTERVENTIONS CINAHL 1982-2006</p> | 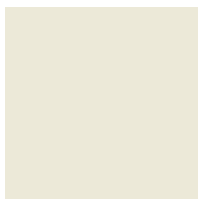 |  <ol style="list-style-type: none"> <li>1. SEARCH: ACCESS-TO-INFORMATION#.DE.</li> <li>2. SEARCH: CONSUMER-HEALTH-INFORMATION#.DE.</li> <li>3. SEARCH: HEALTH-INFORMATION#.DE.</li> <li>4. SEARCH: INFORMATION-</li> </ol> |
|-----------------------------------------------|-------------------------------------------------------------------------------------|---------------------------------------------------------------------------------------------------------------------------------------------------------------------------------------------------------------------------------------------------------------------------------------------------------------|

|  |  |                                                                                                                                                                                                                                                                                                                                                                                                                                                                                                                                                                                                                                                                                                                                                                                                                                                                                                                                                                                                                                                                                                                                                                                                                                                                                                                                                                                                                                                                                    |
|--|--|------------------------------------------------------------------------------------------------------------------------------------------------------------------------------------------------------------------------------------------------------------------------------------------------------------------------------------------------------------------------------------------------------------------------------------------------------------------------------------------------------------------------------------------------------------------------------------------------------------------------------------------------------------------------------------------------------------------------------------------------------------------------------------------------------------------------------------------------------------------------------------------------------------------------------------------------------------------------------------------------------------------------------------------------------------------------------------------------------------------------------------------------------------------------------------------------------------------------------------------------------------------------------------------------------------------------------------------------------------------------------------------------------------------------------------------------------------------------------------|
|  |  | <p>RESOURCES#.DE.</p> <p>5. SEARCH: INFORMATION-NEEDS#.DE.</p> <p>6. SEARCH: INFORMATION-SEEKING-BEHAVIOR#.DE.</p> <p>7. SEARCH: MULTIDISCIPLINARY-CARE-TEAM#.DE.</p> <p>8. SEARCH: COMMUNITY-NETWORKS#.DE.</p> <p>9. SEARCH: SUPPORT-GROUPS#.DE.</p> <p>10. SEARCH: CAREGIVER-SUPPORT#.DE.</p> <p>11. SEARCH: SOCIAL-SUPPORT-INDEX#.DE. OR DECISION-MAKING-SUPPORT-IOWA-NIC#.DE. OR EMOTIONAL-SUPPORT-IOWA-NIC#.DE. OR SPIRITUAL-SUPPORT-IOWA-NIC#.DE. OR SUPPORT-PSYCHOSOCIAL#.DE. OR COPING-SUPPORT-SABA-HHCC#.DE.</p> <p>12. SEARCH: HELP-SEEKING-BEHAVIOR#.DE.</p> <p>13. SEARCH: COUNSELING#.W..DE.</p> <p>14. SEARCH: COGNITIVE-THERAPY#.DE.</p> <p>15. SEARCH: INTERNET#.W..DE.</p> <p>16. SEARCH: HEALTH-EDUCATION#.DE.</p> <p>17. SEARCH: DECISION-MAKING#.DE.</p> <p>18. SEARCH: DECISION-MAKING#.DE. OR DECISION-MAKING-FAMILY#.DE.</p> <p>19. SEARCH: EARLY-CHILDHOOD-INTERVENTION#.DE.</p> <p>20. SEARCH: PAMPHLETS OR PAMPLETS OR LEAFLETS OR BOOKLET OR POSTER OR GUIDE OR GUIDANCE OR DVD OR COMPUTER OR WEB OR CD OR CDROM OR TV OR TALK OR VISIT OR ADVICE OR ADVISORY OR OUTREACH OR HOME.AB.</p> <p>21. SEARCH: 1 OR 2 OR 3 OR 4 OR 5 OR 6 OR 7 OR 8 OR 9 OR 10 OR 11 OR 12 OR 13 OR 14 OR 15 OR 16 OR 17 OR 18 OR 19 OR 20</p> <p>22. SEARCH: CHILDBIRTH-PREMATURE#.DE. OR INFANT-PREMATURE#.DE.</p> <p>23. SEARCH: INFANT-LOW-BIRTH-WEIGHT#.DE.</p> <p>24. SEARCH: INFANT-VERY-LOW-BIRTH-WEIGHT#.DE.</p> <p>25. SEARCH: INTENSIVE-CARE-NEONATAL#.DE. OR</p> |
|--|--|------------------------------------------------------------------------------------------------------------------------------------------------------------------------------------------------------------------------------------------------------------------------------------------------------------------------------------------------------------------------------------------------------------------------------------------------------------------------------------------------------------------------------------------------------------------------------------------------------------------------------------------------------------------------------------------------------------------------------------------------------------------------------------------------------------------------------------------------------------------------------------------------------------------------------------------------------------------------------------------------------------------------------------------------------------------------------------------------------------------------------------------------------------------------------------------------------------------------------------------------------------------------------------------------------------------------------------------------------------------------------------------------------------------------------------------------------------------------------------|

|  |  |                                                                                                                                                                                                                                                                                                                                                                                                                                                                                                                                                                                                                                                                                                                                                                                                                            |
|--|--|----------------------------------------------------------------------------------------------------------------------------------------------------------------------------------------------------------------------------------------------------------------------------------------------------------------------------------------------------------------------------------------------------------------------------------------------------------------------------------------------------------------------------------------------------------------------------------------------------------------------------------------------------------------------------------------------------------------------------------------------------------------------------------------------------------------------------|
|  |  | <p>NEONATAL-INTENSIVE-CARE-NURSING.DE. OR INTENSIVE-CARE-UNITS-NEONATAL#.DE.</p> <p>26. SEARCH: SPECIAL ADJ CARE ADJ BABY ADJ UNIT</p> <p>27. SEARCH: SPECIAL ADJ CARE NEXT BABY</p> <p>28. SEARCH: (PRETERM OR PREMATURE OR EARLY) NEAR (BABY OR BIRTH OR INFANT OR CHILD).AB.</p> <p>29. SEARCH: 22 OR 23 OR 24 OR 25 OR 26 OR 27 OR 28</p> <p>30. SEARCH: 21 AND 29</p> <p>31. SEARCH: PARENTS#.W..DE.</p> <p>32. SEARCH: PARENTS#.W..DE. OR ADOLESCENT-PARENTS#.DE.</p> <p>33. SEARCH: MOTHERS#.W..DE. OR ADOLESCENT-MOTHERS#.DE.</p> <p>34. SEARCH: FATHERS#.W..DE. OR ADOLESCENT-FATHERS#.DE.</p> <p>35. SEARCH: CAREGIVERS#.W..DE.</p> <p>36. SEARCH: 31 OR 32 OR 33 OR 34 OR 35</p> <p>37. SEARCH: PARENT OR MOTHER OR FATHER OR CAREGIVER.AB.</p> <p>38. SEARCH: 36 OR 37</p> <p>39. SEARCH: 21 AND 29 AND 38</p> |
|--|--|----------------------------------------------------------------------------------------------------------------------------------------------------------------------------------------------------------------------------------------------------------------------------------------------------------------------------------------------------------------------------------------------------------------------------------------------------------------------------------------------------------------------------------------------------------------------------------------------------------------------------------------------------------------------------------------------------------------------------------------------------------------------------------------------------------------------------|

### III. EMBASE

SUPPORT  
INTERVENTIONS EMBASE  
1974-2006

1. SEARCH: INFORMATION-SERVICE#.DE.
2. SEARCH: CONSUMER-HEALTH-INFORMATION#.DE.
3. SEARCH: PATIENT-INFORMATION#.DE.
4. SEARCH: SUPPORT-GROUP#.DE.
5. SEARCH: SOCIAL-SUPPORT#.DE.
6. SEARCH: COUNSELING#.W..DE.
7. SEARCH: PATIENT-COUNSELING#.DE.
8. SEARCH: HELP-SEEKING-BEHAVIOR#.DE.
9. SEARCH: COGNITIVE-THERAPY#.DE.
10. SEARCH: INTERNET#.W..DE.
11. SEARCH: HEALTH-EDUCATION#.DE.
12. SEARCH: PAMPHLETS OR PAMPLETS OR BOOKLET OR LEAFLET OR POSTER OR GUIDE OR GUIDANCE OR VIDEO OR TV OR TELEVISION OR CD OR CDROM OR TALK OR VISIT OR ADVICE OR ADVISORY OR OUTREACH OR HOME.AB.
13. SEARCH: INFORMATION OR COMMUNICATION OR SUPPORT OR HELP OR DECISION OR WEB OR COMPUTER OR TRAINING OR LECTURE OR TALK OR MEETING.AB.
14. SEARCH: 1 OR 2 OR 3 OR 4 OR 5 OR 6 OR 7 OR 8 OR 9 OR 10 OR 11 OR 12 OR 13
15. SEARCH: PREMATURITY#.W..DE.
16. SEARCH: PRETERM
17. SEARCH: LOW-BIRTH-WEIGHT#.DE.
18. SEARCH: VERY-LOW-BIRTH-WEIGHT#.DE.
19. SEARCH: NEWBORN-INTENSIVE-CARE#.DE.
20. SEARCH: SPECIAL ADJ CARE ADJ BABY ADJ UNIT
21. SEARCH: NEONATAL ADJ INTENSIVE ADJ CARE ADJ UNITS

|  |  |                                                                                                                                                                                                                                                                                                                                                                                                                                                                                                                                                                      |
|--|--|----------------------------------------------------------------------------------------------------------------------------------------------------------------------------------------------------------------------------------------------------------------------------------------------------------------------------------------------------------------------------------------------------------------------------------------------------------------------------------------------------------------------------------------------------------------------|
|  |  | <p>22. SEARCH: (PRETERM OR PREMATURE OR EARLY) NEAR (BIRTH OR BABY OR INFANT OR CHILD).AB.</p> <p>23. SEARCH: 15 OR 17 OR 18 OR 19 OR 20 OR 21 OR 22</p> <p>24. SEARCH: PARENT#.W..DE.</p> <p>25. SEARCH: MOTHER#.W..DE.</p> <p>26. SEARCH: FATHER#.W..DE.</p> <p>27. SEARCH: FATHER-CHILD-RELATION#.DE.</p> <p>28. SEARCH: MOTHER-CHILD-RELATION#.DE.</p> <p>29. SEARCH: CAREGIVER#.W..DE.</p> <p>30. SEARCH: MATERNITY NEXT PATIENT</p> <p>31. SEARCH: 24 OR 25 OR 26 OR 27 OR 28 OR 29 OR 30</p> <p>32. SEARCH: 14 AND 23 AND 31</p> <p>33. SEARCH: 14 AND 23</p> |
|--|--|----------------------------------------------------------------------------------------------------------------------------------------------------------------------------------------------------------------------------------------------------------------------------------------------------------------------------------------------------------------------------------------------------------------------------------------------------------------------------------------------------------------------------------------------------------------------|

#### IV. Psych-Info

|                                                     |                                                                                     |                                                                                                                                                                                                                                                                                                                                                                                                                                                                                                                                                                                                                                                                          |
|-----------------------------------------------------|-------------------------------------------------------------------------------------|--------------------------------------------------------------------------------------------------------------------------------------------------------------------------------------------------------------------------------------------------------------------------------------------------------------------------------------------------------------------------------------------------------------------------------------------------------------------------------------------------------------------------------------------------------------------------------------------------------------------------------------------------------------------------|
| <p>SUPPORT INTERVENTIONS<br/>PSYCINFO 1970-2006</p> |  |  <p>1. SEARCH: PREMATURE-BIRTH#.DE.</p> <p>2. SEARCH: BIRTH-WEIGHT#.DE.</p> <p>3. SEARCH: (PRETERM OR PREMATURE OR EARLY) NEAR (BIRTH OR BABY OR INFANT OR CHILD)</p> <p>4. SEARCH: 3.AB.</p> <p>5. SEARCH: (PRETERM OR PREMATURE OR EARLY) NEAR (DELIVERY OR BIRTH OR BABY OR INFANT OR CHILD).AB.</p> <p>6. SEARCH: SPECIAL ADJ CARE NEAR BABY</p> <p>7. SEARCH: SPECIAL ADJ CARE NEAR BABY.AB.</p> <p>8. SEARCH: 1 OR 2 OR 3 OR 5 OR 7</p> <p>9. SEARCH: INFORMATION NEAR (PARENT OR MOTHER OR FATHER OR CAREGIVER).AB.</p> <p>10. SEARCH: INFORMATION#.W..MJ. OR INFORMATION-</p> |
|-----------------------------------------------------|-------------------------------------------------------------------------------------|--------------------------------------------------------------------------------------------------------------------------------------------------------------------------------------------------------------------------------------------------------------------------------------------------------------------------------------------------------------------------------------------------------------------------------------------------------------------------------------------------------------------------------------------------------------------------------------------------------------------------------------------------------------------------|

|  |  |                                                                                                                                                                                                                                                                                                                                                                                                                                                                                                                                                                                                                                                                                                                                                                                                                                                                                                                                                                                                                                                                                                                                                                                                                                                                                                                                                                                                                                                                                                                                    |
|--|--|------------------------------------------------------------------------------------------------------------------------------------------------------------------------------------------------------------------------------------------------------------------------------------------------------------------------------------------------------------------------------------------------------------------------------------------------------------------------------------------------------------------------------------------------------------------------------------------------------------------------------------------------------------------------------------------------------------------------------------------------------------------------------------------------------------------------------------------------------------------------------------------------------------------------------------------------------------------------------------------------------------------------------------------------------------------------------------------------------------------------------------------------------------------------------------------------------------------------------------------------------------------------------------------------------------------------------------------------------------------------------------------------------------------------------------------------------------------------------------------------------------------------------------|
|  |  | <p>SEEKING#.MJ. OR<br/>INFORMATION-<br/>SERVICES#.MJ.</p> <p>11. SEARCH: CLIENT-EDUCATION#.DE.<br/>12. SEARCH: COUNSELING#.W..DE.<br/>13. SEARCH: INDIVIDUAL-<br/>PSYCHOTHERAPY#.DE.<br/>14. SEARCH: ONLINE-THERAPY#.DE.<br/>15. SEARCH: INTERNET#.W..DE.<br/>16. SEARCH: COGNITIVE-THERAPY#.DE.<br/>17. SEARCH: SUPPORT-GROUPS#.DE.<br/>18. SEARCH: SOCIAL-SUPPORT#.DE.<br/>19. SEARCH: SUPPORTIVE-<br/>PSYCHOTHERAPY#.DE.<br/>20. SEARCH: CRISIS-INTERVENTION#.DE.<br/>OR EARLY-<br/>INTERVENTION#.DE. OR<br/>FAMILY-INTERVENTION#.DE.<br/>21. SEARCH: SCHOOL-BASED-<br/>INTERVENTION#.DE.<br/>22. SEARCH: OUTREACH-<br/>PROGRAMS#.DE.<br/>23. SEARCH: HOME-VISITING-<br/>PROGRAMS#.DE.<br/>24. SEARCH: ADVICE OR ADVISORY OR<br/>GUIDE OR GUIDANCE OR<br/>LEAFLET OR PAMPHLET OR<br/>PAMPHLET OR POSTER OR<br/>TELEVISION OR DVD OR<br/>VIDEO OR CDROM OR CD<br/>OR TALK OR TRAINING OR<br/>LECTURE OR WEB OR<br/>COMPUTER OR SUPPORT<br/>OR HELP.AB.<br/>25. SEARCH: PARENT-CHILD-<br/>RELATIONS#.DE. OR<br/>PARENT-TRAINING#.DE. OR<br/>PARENTAL-<br/>INVOLVEMENT#.DE. OR<br/>PARENTAL-ROLE#.DE. OR<br/>PARENTS#.W..DE.<br/>26. SEARCH: MOTHER-CHILD-<br/>RELATIONS#.DE. OR<br/>MOTHERS#.W..DE. OR<br/>ADOLESCENT-<br/>MOTHERS#.DE.<br/>27. SEARCH: FATHER-CHILD-<br/>RELATIONS#.DE. OR<br/>FATHERS#.W..DE. OR<br/>ADOLESCENT-<br/>FATHERS#.DE.<br/>28. SEARCH: CAREGIVERS#.W..MJ.<br/>29. SEARCH: 25 OR 26 OR 27 OR 28<br/>30. SEARCH: 9 OR 10 OR 11 OR 12 OR 13<br/>OR 14 OR 15 OR 16 OR 17<br/>OR 18 OR 19 OR 20 OR 21</p> |
|--|--|------------------------------------------------------------------------------------------------------------------------------------------------------------------------------------------------------------------------------------------------------------------------------------------------------------------------------------------------------------------------------------------------------------------------------------------------------------------------------------------------------------------------------------------------------------------------------------------------------------------------------------------------------------------------------------------------------------------------------------------------------------------------------------------------------------------------------------------------------------------------------------------------------------------------------------------------------------------------------------------------------------------------------------------------------------------------------------------------------------------------------------------------------------------------------------------------------------------------------------------------------------------------------------------------------------------------------------------------------------------------------------------------------------------------------------------------------------------------------------------------------------------------------------|



|  |  |                                                                                                                                                                                            |
|--|--|--------------------------------------------------------------------------------------------------------------------------------------------------------------------------------------------|
|  |  | <p>OR 22 OR 23 OR 24</p> <p>31. SEARCH: 8 AND 29 AND 30</p> <p>32. SEARCH: 30 NEAR (PARENT OR MOTHER OR FATHER OR CAREGIVER)</p> <p>33. SEARCH: 29 NEAR 30</p> <p>34. SEARCH: 33 AND 8</p> |
|--|--|--------------------------------------------------------------------------------------------------------------------------------------------------------------------------------------------|
